# Supplementary material for: Exploring the bioactives and the mechanism of Aegle marmelos in the treatment of Inflammatory bowel disease through network pharmacology and molecular docking approach
Source: Research Square preprint supplement (doi:10.21203/rs.3.rs-3421028/v1), 2023-10-13
Supplement: Supplementary file 1 [file 3d0bec8d80fd80fca315ee8c.xlsx]

## Sheet: Details of all worksheet
KEGG ENRICHMENT USING DAVID AND INPUT
Worksheet name	Details
AM_KEGG	KEGG pathways enriched with the hub targets of AM
AM_BP	Biological processes enriched with the hub targets of AM
AM_CC	Cellular components enriched with the hub targets of AM
AM_MF	Molecular functions enriched with the hub targets of AM
GO Numbers	Number of specific genes involved in enrichement of AM
GO and KEGG (Details of fig 7)	Gene Ontology enriched with the hub targets of AM.

## Sheet:  AM_KEGG 
Category	Term	Count	%	P-Value	Fold Enrichment	Bonferroni	Benjamini	FDR
KEGG_PATHWAY	Pathways in cancer	40	58	7.9e-30	9.2	1.7e-27	1.7e-27	5.4e-28
KEGG_PATHWAY	PI3K-Akt signaling pathway	29	42	1.8e-21	10.1	3.8e-19	6.4e-20	2e-20
KEGG_PATHWAY	Lipid and atherosclerosis	28	40.6	4.4e-26	16	9.3e-24	4.7e-24	1.5e-24
KEGG_PATHWAY	Hepatitis B	25	36.2	7.3e-25	18.9	1.6e-22	5.2e-23	1.7e-23
KEGG_PATHWAY	Proteoglycans in cancer	25	36.2	2.4e-22	15	5.2e-20	1.3e-20	4.1e-21
KEGG_PATHWAY	Human immunodeficiency virus 1 infection	21	30.4	1e-16	12.2	2.4e-14	2.2e-15	7.1e-16
KEGG_PATHWAY	MAPK signaling pathway	21	30.4	1e-13	8.5	2.2e-11	9.7e-13	3.1e-13
KEGG_PATHWAY	Kaposi sarcoma-associated herpesvirus infection	20	29	3.4e-16	12.6	7.1e-14	4.9e-15	1.6e-15
KEGG_PATHWAY	Epstein-Barr virus infection	20	29	7.3e-16	12.1	1.7e-13	9.8e-15	3.1e-15
KEGG_PATHWAY	Chemical carcinogenesis - receptor activation	20	29	1.9e-15	11.6	4e-13	2.4e-14	7.6e-15
KEGG_PATHWAY	Human papillomavirus infection	20	29	6.3e-12	7.4	1.3e-09	3.3e-11	1e-11
KEGG_PATHWAY	EGFR tyrosine kinase inhibitor resistance	19	27.5	3.2e-22	29.5	6.8e-20	1.4e-20	4.3e-21
KEGG_PATHWAY	Prostate cancer	19	27.5	1.7e-20	24	3.7e-18	5.3e-19	1.7e-19
KEGG_PATHWAY	Human cytomegalovirus infection	19	27.5	8.7e-14	10.4	1.9e-11	8.5e-13	2.7e-13
KEGG_PATHWAY	Salmonella infection	19	27.5	5.1e-13	9.4	1.1e-10	3.5e-12	1.1e-12
KEGG_PATHWAY	Endocrine resistance	18	26.1	7.7e-19	22.5	1.7e-16	2.1e-17	6.6e-18
KEGG_PATHWAY	MicroRNAs in cancer	18	26.1	2e-10	7.1	4.4e-08	7.3e-10	2.3e-10
KEGG_PATHWAY	Th17 cell differentiation	17	24.6	1.3e-16	19.3	2.4e-14	2.5e-15	8e-16
KEGG_PATHWAY	HIF-1 signaling pathway	17	24.6	1.5e-16	19.1	2.4e-14	2.7e-15	8.5e-16
KEGG_PATHWAY	Toxoplasmosis	17	24.6	2.4e-16	18.6	4.8e-14	3.6e-15	1.1e-15
KEGG_PATHWAY	Yersinia infection	17	24.6	6.6e-15	15.2	1.4e-12	7.1e-14	2.2e-14
KEGG_PATHWAY	Influenza A	17	24.6	2.2e-13	12.2	4.8e-11	1.8e-12	5.7e-13
KEGG_PATHWAY	Focal adhesion	17	24.6	3.3e-12	10.3	7e-10	1.8e-11	5.8e-12
KEGG_PATHWAY	Human T-cell leukemia virus 1 infection	17	24.6	1.3e-11	9.4	2.7e-09	6.1e-11	1.9e-11
KEGG_PATHWAY	Ras signaling pathway	17	24.6	3.2e-11	8.8	6.9e-09	1.3e-10	4.2e-11
KEGG_PATHWAY	ErbB signaling pathway	16	23.2	8.3e-17	23.1	2.4e-14	2e-15	6.2e-16
KEGG_PATHWAY	PD-L1 expression and PD-1 checkpoint pathway in cancer	16	23.2	1.7e-16	22.1	4.8e-14	2.8e-15	8.9e-16
KEGG_PATHWAY	C-type lectin receptor signaling pathway	16	23.2	2.1e-15	18.9	4.5e-13	2.4e-14	7.8e-15
KEGG_PATHWAY	Measles	16	23.2	1.7e-13	14.1	3.6e-11	1.4e-12	4.6e-13
KEGG_PATHWAY	Fluid shear stress and atherosclerosis	16	23.2	1.7e-13	14.1	3.6e-11	1.4e-12	4.6e-13
KEGG_PATHWAY	Gastric cancer	16	23.2	4.7e-13	13.2	1e-10	3.4e-12	1.1e-12
KEGG_PATHWAY	JAK-STAT signaling pathway	16	23.2	2.3e-12	11.8	5e-10	1.4e-11	4.4e-12
KEGG_PATHWAY	Tuberculosis	16	23.2	7.6e-12	10.9	1.6e-09	3.8e-11	1.2e-11
KEGG_PATHWAY	Viral carcinogenesis	16	23.2	4.6e-11	9.6	9.9e-09	1.8e-10	5.7e-11
KEGG_PATHWAY	Chemical carcinogenesis - reactive oxygen species	16	23.2	1.6e-10	8.8	3.5e-08	6e-10	1.9e-10
KEGG_PATHWAY	Coronavirus disease - COVID-19	16	23.2	2.9e-10	8.5	6.2e-08	9.8e-10	3.1e-10
KEGG_PATHWAY	Herpes simplex virus 1 infection	16	23.2	9.7e-06	3.8	0.0021	1.9e-05	9.7e-06
KEGG_PATHWAY	AGE-RAGE signaling pathway in diabetic complications	15	21.7	3e-14	18.4	6.3e-12	3e-13	9.6e-14
KEGG_PATHWAY	TNF signaling pathway	15	21.7	1.9e-13	16.1	4.1e-11	1.6e-12	5e-13
KEGG_PATHWAY	Thyroid hormone signaling pathway	15	21.7	4.5e-13	15.2	9.5e-11	3.3e-12	1e-12
KEGG_PATHWAY	Osteoclast differentiation	15	21.7	9.8e-13	14.4	2.1e-10	6.4e-12	2e-12
KEGG_PATHWAY	Relaxin signaling pathway	15	21.7	1.1e-12	14.3	2.3e-10	6.9e-12	2.2e-12
KEGG_PATHWAY	Estrogen signaling pathway	15	21.7	2.8e-12	13.3	6e-10	1.6e-11	5.1e-12
KEGG_PATHWAY	Hepatitis C	15	21.7	1.7e-11	11.7	3.5e-09	7.7e-11	2.4e-11
KEGG_PATHWAY	Chemokine signaling pathway	15	21.7	2.5e-10	9.6	5.4e-08	8.8e-10	2.8e-10
KEGG_PATHWAY	Pathogenic Escherichia coli infection	15	21.7	3.5e-10	9.3	7.5e-08	1.2e-09	3.7e-10
KEGG_PATHWAY	Shigellosis	15	21.7	6.8e-09	7.5	1.5e-06	1.9e-08	6.8e-09
KEGG_PATHWAY	Alzheimer disease	15	21.7	1.6e-06	4.8	0.00035	3.4e-06	1.6e-06
KEGG_PATHWAY	Pathways of neurodegeneration - multiple diseases	15	21.7	1.9e-05	3.9	0.0041	3.7e-05	1.9e-05
KEGG_PATHWAY	Fc epsilon RI signaling pathway	14	20.3	3.9e-15	25.3	8.3e-13	4.4e-14	1.4e-14
KEGG_PATHWAY	T cell receptor signaling pathway	14	20.3	1.2e-12	16.5	2.6e-10	7.4e-12	2.4e-12
KEGG_PATHWAY	Growth hormone synthesis, secretion and action	14	20.3	7.9e-12	14.3	1.7e-09	3.8e-11	1.2e-11
KEGG_PATHWAY	FoxO signaling pathway	14	20.3	2.4e-11	13.1	5.2e-09	1.1e-10	3.4e-11
KEGG_PATHWAY	Neutrophil extracellular trap formation	14	20.3	2.8e-09	9	5.9e-07	8.6e-09	2.8e-09
KEGG_PATHWAY	Rap1 signaling pathway	14	20.3	8.8e-09	8.2	1.9e-06	2.4e-08	8.8e-09
KEGG_PATHWAY	Non-small cell lung cancer	13	18.8	2.8e-13	22.2	5.9e-11	2.1e-12	6.7e-13
KEGG_PATHWAY	Pancreatic cancer	13	18.8	5.4e-13	21	1.2e-10	3.6e-12	1.2e-12
KEGG_PATHWAY	Small cell lung cancer	13	18.8	5.8e-12	17.3	1.2e-09	3.1e-11	9.8e-12
KEGG_PATHWAY	IL-17 signaling pathway	13	18.8	7.5e-12	17	1.6e-09	3.8e-11	1.2e-11
KEGG_PATHWAY	Progesterone-mediated oocyte maturation	13	18.8	2e-11	15.6	4.3e-09	9e-11	2.9e-11
KEGG_PATHWAY	Chagas disease	13	18.8	2e-11	15.6	4.3e-09	9e-11	2.9e-11
KEGG_PATHWAY	Toll-like receptor signaling pathway	13	18.8	2.5e-11	15.3	5.5e-09	1.1e-10	3.5e-11
KEGG_PATHWAY	Insulin resistance	13	18.8	4e-11	14.8	8.6e-09	1.6e-10	5.1e-11
KEGG_PATHWAY	Neurotrophin signaling pathway	13	18.8	1.3e-10	13.4	2.7e-08	4.9e-10	1.5e-10
KEGG_PATHWAY	Sphingolipid signaling pathway	13	18.8	1.6e-10	13.2	3.3e-08	5.7e-10	1.8e-10
KEGG_PATHWAY	Natural killer cell mediated cytotoxicity	13	18.8	2.7e-10	12.6	5.9e-08	9.5e-10	3e-10
KEGG_PATHWAY	Cellular senescence	13	18.8	3e-09	10.2	6.4e-07	9.2e-09	3e-09
KEGG_PATHWAY	NOD-like receptor signaling pathway	13	18.8	2.2e-08	8.6	4.7e-06	5.8e-08	2.2e-08
KEGG_PATHWAY	Prolactin signaling pathway	12	17.4	5.8e-12	21	1.2e-09	3.1e-11	9.8e-12
KEGG_PATHWAY	B cell receptor signaling pathway	12	17.4	4.5e-11	17.5	9.7e-09	1.8e-10	5.7e-11
KEGG_PATHWAY	Apoptosis	12	17.4	8.6e-09	10.8	1.8e-06	2.4e-08	8.6e-09
KEGG_PATHWAY	Phospholipase D signaling pathway	12	17.4	2.1e-08	9.9	4.5e-06	5.6e-08	2.1e-08
KEGG_PATHWAY	Non-alcoholic fatty liver disease	12	17.4	3.4e-08	9.5	7.3e-06	8.7e-08	3.4e-08
KEGG_PATHWAY	mTOR signaling pathway	12	17.4	3.6e-08	9.4	7.8e-06	9.1e-08	3.6e-08
KEGG_PATHWAY	Hepatocellular carcinoma	12	17.4	7.8e-08	8.8	1.7e-05	1.9e-07	7.8e-08
KEGG_PATHWAY	Diabetic cardiomyopathy	12	17.4	5.3e-07	7.3	0.00011	1.2e-06	5.3e-07
KEGG_PATHWAY	Prion disease	12	17.4	9.6e-06	5.4	0.0021	1.9e-05	9.6e-06
KEGG_PATHWAY	VEGF signaling pathway	11	15.9	2.6e-11	22.9	5.6e-09	1.1e-10	3.5e-11
KEGG_PATHWAY	Adipocytokine signaling pathway	11	15.9	1.3e-10	19.6	2.8e-08	5e-10	1.6e-10
KEGG_PATHWAY	Chronic myeloid leukemia	11	15.9	3.5e-10	17.8	7.6e-08	1.2e-09	3.7e-10
KEGG_PATHWAY	Colorectal cancer	11	15.9	1.2e-09	15.7	2.6e-07	4e-09	1.3e-09
KEGG_PATHWAY	Th1 and Th2 cell differentiation	11	15.9	2.4e-09	14.7	5.2e-07	7.6e-09	2.4e-09
KEGG_PATHWAY	Fc gamma R-mediated phagocytosis	11	15.9	4.1e-09	13.9	8.8e-07	1.2e-08	4.1e-09
KEGG_PATHWAY	Choline metabolism in cancer	11	15.9	4.5e-09	13.8	9.7e-07	1.3e-08	4.5e-09
KEGG_PATHWAY	Insulin signaling pathway	11	15.9	1.2e-07	9.9	2.5e-05	2.7e-07	1.2e-07
KEGG_PATHWAY	Autophagy - animal	11	15.9	1.5e-07	9.6	3.3e-05	3.5e-07	1.5e-07
KEGG_PATHWAY	Signaling pathways regulating pluripotency of stem cells	11	15.9	1.7e-07	9.4	3.7e-05	3.9e-07	1.7e-07
KEGG_PATHWAY	Breast cancer	11	15.9	2.3e-07	9.2	4.8e-05	5e-07	2.3e-07
KEGG_PATHWAY	Axon guidance	11	15.9	1.6e-06	7.4	0.00035	3.4e-06	1.6e-06
KEGG_PATHWAY	cAMP signaling pathway	11	15.9	1.1e-05	6	0.0023	2.1e-05	1.1e-05
KEGG_PATHWAY	Acute myeloid leukemia	10	14.5	2.4e-09	18.3	5.1e-07	7.6e-09	2.4e-09
KEGG_PATHWAY	Renal cell carcinoma	10	14.5	3.1e-09	17.8	6.7e-07	9.4e-09	3.1e-09
KEGG_PATHWAY	Epithelial cell signaling in Helicobacter pylori infection	10	14.5	3.6e-09	17.5	7.6e-07	1e-08	3.6e-09
KEGG_PATHWAY	Central carbon metabolism in cancer	10	14.5	3.6e-09	17.5	7.6e-07	1e-08	3.6e-09
KEGG_PATHWAY	Glioma	10	14.5	6.7e-09	16.4	1.4e-06	1.9e-08	6.7e-09
KEGG_PATHWAY	GnRH signaling pathway	10	14.5	4.6e-08	13.2	9.7e-06	1.1e-07	4.6e-08
KEGG_PATHWAY	Adherens junction	10	14.5	4.6e-08	13.2	9.7e-06	1.1e-07	4.6e-08
KEGG_PATHWAY	Platelet activation	10	14.5	5.5e-07	9.9	0.00012	1.2e-06	5.5e-07
KEGG_PATHWAY	Alcoholic liver disease	10	14.5	1.7e-06	8.6	0.00037	3.6e-06	1.7e-06
KEGG_PATHWAY	Regulation of actin cytoskeleton	10	14.5	8.1e-05	5.4	0.017	0.00015	8.1e-05
KEGG_PATHWAY	Longevity regulating pathway - multiple species	9	13	2.7e-08	17.8	5.8e-06	7.1e-08	2.7e-08
KEGG_PATHWAY	Melanoma	9	13	9.1e-08	15.3	1.9e-05	2.2e-07	9.1e-08
KEGG_PATHWAY	Pertussis	9	13	1.4e-07	14.5	3e-05	3.2e-07	1.4e-07
KEGG_PATHWAY	Leishmaniasis	9	13	1.5e-07	14.3	3.3e-05	3.5e-07	1.5e-07
KEGG_PATHWAY	Amoebiasis	9	13	1.4e-06	10.8	0.00029	3e-06	1.4e-06
KEGG_PATHWAY	Cholinergic synapse	9	13	3e-06	9.8	0.00064	6.1e-06	3e-06
KEGG_PATHWAY	Leukocyte transendothelial migration	9	13	3.2e-06	9.7	0.00068	6.5e-06	3.2e-06
KEGG_PATHWAY	Necroptosis	9	13	3.7e-05	6.9	0.0079	7e-05	3.7e-05
KEGG_PATHWAY	Transcriptional misregulation in cancer	9	13	0.00014	5.7	0.031	0.00026	0.00014
KEGG_PATHWAY	Amyotrophic lateral sclerosis	9	13	0.0084	3	0.84	0.013	0.0084
KEGG_PATHWAY	Bladder cancer	8	11.6	2.9e-08	23.9	6.1e-06	7.4e-08	2.9e-08
KEGG_PATHWAY	Type II diabetes mellitus	8	11.6	6.6e-08	21.3	1.4e-05	1.6e-07	6.6e-08
KEGG_PATHWAY	Platinum drug resistance	8	11.6	1.7e-06	13.4	0.00036	3.5e-06	1.7e-06
KEGG_PATHWAY	Oocyte meiosis	8	11.6	8e-05	7.5	0.017	0.00015	8e-05
KEGG_PATHWAY	Calcium signaling pathway	8	11.6	0.004	3.9	0.58	0.0064	0.004
KEGG_PATHWAY	Legionellosis	7	10.1	5.6e-06	15.1	0.0012	1.1e-05	5.6e-06
KEGG_PATHWAY	Endometrial cancer	7	10.1	6.3e-06	14.8	0.0013	1.3e-05	6.3e-06
KEGG_PATHWAY	GnRH secretion	7	10.1	1.1e-05	13.4	0.0024	2.2e-05	1.1e-05
KEGG_PATHWAY	Gap junction	7	10.1	6.9e-05	9.8	0.015	0.00013	6.9e-05
KEGG_PATHWAY	Longevity regulating pathway	7	10.1	7.4e-05	9.6	0.016	0.00014	7.4e-05
KEGG_PATHWAY	Inflammatory mediator regulation of TRP channels	7	10.1	0.00013	8.8	0.027	0.00023	0.00013
KEGG_PATHWAY	NF-kappa B signaling pathway	7	10.1	0.00018	8.3	0.037	0.00031	0.00018
KEGG_PATHWAY	Parathyroid hormone synthesis, secretion and action	7	10.1	0.0002	8.1	0.041	0.00034	0.0002
KEGG_PATHWAY	Apelin signaling pathway	7	10.1	0.00084	6.2	0.16	0.0014	0.00084
KEGG_PATHWAY	Protein processing in endoplasmic reticulum	7	10.1	0.0026	4.9	0.43	0.0043	0.0026
KEGG_PATHWAY	Long-term depression	6	8.7	0.00011	12.3	0.024	0.0002	0.00011
KEGG_PATHWAY	Antigen processing and presentation	6	8.7	0.00039	9.4	0.079	0.00066	0.00039
KEGG_PATHWAY	TGF-beta signaling pathway	6	8.7	0.0017	6.8	0.3	0.0029	0.0017
KEGG_PATHWAY	AMPK signaling pathway	6	8.7	0.0028	6.1	0.45	0.0045	0.0028
KEGG_PATHWAY	Spinocerebellar ataxia	6	8.7	0.0057	5.1	0.71	0.009	0.0057
KEGG_PATHWAY	Adrenergic signaling in cardiomyocytes	6	8.7	0.0078	4.8	0.81	0.012	0.0078
KEGG_PATHWAY	Aldosterone-regulated sodium reabsorption	5	7.2	0.00021	16.6	0.043	0.00036	0.00021
KEGG_PATHWAY	Thyroid cancer	5	7.2	0.00021	16.6	0.043	0.00036	0.00021
KEGG_PATHWAY	Long-term potentiation	5	7.2	0.002	9.2	0.35	0.0033	0.002
KEGG_PATHWAY	RIG-I-like receptor signaling pathway	5	7.2	0.0025	8.6	0.41	0.0041	0.0025
KEGG_PATHWAY	Bacterial invasion of epithelial cells	5	7.2	0.0033	8	0.51	0.0053	0.0033
KEGG_PATHWAY	Melanogenesis	5	7.2	0.0087	6.1	0.84	0.013	0.0087
KEGG_PATHWAY	Serotonergic synapse	5	7.2	0.014	5.3	0.95	0.021	0.014
KEGG_PATHWAY	Retrograde endocannabinoid signaling	5	7.2	0.031	4.1	1	0.046	0.031
KEGG_PATHWAY	Oxytocin signaling pathway	5	7.2	0.035	4	1	0.051	0.035
KEGG_PATHWAY	Cell cycle	5	7.2	0.037	3.9	1	0.054	0.037
KEGG_PATHWAY	Alcoholism	5	7.2	0.064	3.3	1	0.09	0.064
KEGG_PATHWAY	Antifolate resistance	4	5.8	0.0017	16.4	0.31	0.0029	0.0017
KEGG_PATHWAY	Inflammatory bowel disease	4	5.8	0.015	7.5	0.96	0.023	0.015
KEGG_PATHWAY	p53 signaling pathway	4	5.8	0.021	6.6	0.99	0.033	0.021
KEGG_PATHWAY	PPAR signaling pathway	4	5.8	0.022	6.5	0.99	0.033	0.022
KEGG_PATHWAY	Cytosolic DNA-sensing pathway	4	5.8	0.022	6.5	0.99	0.033	0.022
KEGG_PATHWAY	Dopaminergic synapse	4	5.8	0.09	3.7	1	0.12	0.09
KEGG_PATHWAY	Vascular smooth muscle contraction	4	5.8	0.093	3.7	1	0.13	0.093
KEGG_PATHWAY	Apoptosis - multiple species	3	4.3	0.027	11.5	1	0.04	0.027
KEGG_PATHWAY	African trypanosomiasis	3	4.3	0.035	9.9	1	0.051	0.035
KEGG_PATHWAY	Graft-versus-host disease	3	4.3	0.045	8.8	1	0.064	0.045
KEGG_PATHWAY	Carbohydrate digestion and absorption	3	4.3	0.055	7.8	1	0.078	0.055
KEGG_PATHWAY	Malaria	3	4.3	0.061	7.4	1	0.086	0.061
KEGG_PATHWAY	Regulation of lipolysis in adipocytes	3	4.3	0.079	6.3	1	0.11	0.079

## Sheet: AM_BP
Category	Term	Count	%	P-Value	Fold Enrichment	Bonferroni	Benjamini	FDR	Fisher Exact
GOTERM_BP_DIRECT	negative regulation of apoptotic process	26	37.7	2.7e-22	14	4.7e-19	4.5e-19	3.9e-19	1.8e-23
GOTERM_BP_DIRECT	protein phosphorylation	26	37.7	5.1e-22	13.6	9e-19	4.5e-19	3.9e-19	3.6e-23
GOTERM_BP_DIRECT	peptidyl-tyrosine phosphorylation	14	20.3	1.4e-19	56.3	2.5e-16	8.3e-17	7.1e-17	2.1e-21
GOTERM_BP_DIRECT	protein autophosphorylation	16	23.2	4.6e-17	25.1	8.1e-14	2e-14	1.7e-14	1.7e-18
GOTERM_BP_DIRECT	transmembrane receptor protein tyrosine kinase signaling pathway	13	18.8	4.1e-14	27.1	7.1e-11	1.4e-11	1.2e-11	1.3e-15
GOTERM_BP_DIRECT	positive regulation of smooth muscle cell proliferation	10	14.5	4.3e-13	48.5	7.5e-10	1.1e-10	9.2e-11	7.4e-15
GOTERM_BP_DIRECT	positive regulation of protein phosphorylation	14	20.3	4.3e-13	18.5	7.5e-10	1.1e-10	9.2e-11	2.2e-14
GOTERM_BP_DIRECT	peptidyl-serine phosphorylation	13	18.8	1.8e-12	19.8	3.1e-09	3.9e-10	3.4e-10	8.5e-14
GOTERM_BP_DIRECT	positive regulation of cell proliferation	18	26.1	3.5e-12	9.4	6.1e-09	6.1e-10	5.3e-10	3.6e-13
GOTERM_BP_DIRECT	intracellular signal transduction	17	24.6	3.5e-12	10.4	6.1e-09	6.1e-10	5.3e-10	3.2e-13
GOTERM_BP_DIRECT	positive regulation of transcription from RNA polymerase II promoter	24	34.8	1e-11	5.5	1.8e-08	1.6e-09	1.4e-09	1.8e-12
GOTERM_BP_DIRECT	positive regulation of gene expression	17	24.6	1.8e-11	9.3	3.2e-08	2.6e-09	2.3e-09	1.9e-12
GOTERM_BP_DIRECT	Fc-gamma receptor signaling pathway involved in phagocytosis	7	10.1	7.7e-11	93.8	1.3e-07	1e-08	8.9e-09	5.9e-13
GOTERM_BP_DIRECT	peptidyl-tyrosine autophosphorylation	7	10.1	1.1e-10	89.5	1.8e-07	1.2e-08	1.1e-08	8.6e-13
GOTERM_BP_DIRECT	positive regulation of cell migration	13	18.8	1.1e-10	14	1.9e-07	1.2e-08	1.1e-08	7.2e-12
GOTERM_BP_DIRECT	JAK-STAT cascade involved in growth hormone signaling pathway	6	8.7	1.1e-10	168.8	2e-07	1.2e-08	1.1e-08	3.4e-13
GOTERM_BP_DIRECT	cell migration	13	18.8	1.8e-10	13.3	3.2e-07	1.9e-08	1.6e-08	1.3e-11
GOTERM_BP_DIRECT	signal transduction	23	33.3	2e-10	5	3.4e-07	1.9e-08	1.6e-08	3.8e-11
GOTERM_BP_DIRECT	positive regulation of transcription, DNA-templated	18	26.1	3.3e-10	7	5.8e-07	3e-08	2.6e-08	4.6e-11
GOTERM_BP_DIRECT	epidermal growth factor receptor signaling pathway	8	11.6	4.8e-10	44.1	8.5e-07	4e-08	3.5e-08	9.4e-12
GOTERM_BP_DIRECT	ephrin receptor signaling pathway	8	11.6	4.8e-10	44.1	8.5e-07	4e-08	3.5e-08	9.4e-12
GOTERM_BP_DIRECT	positive regulation of phosphatidylinositol 3-kinase signaling	9	13	6.3e-10	29.4	1.1e-06	5e-08	4.3e-08	2e-11
GOTERM_BP_DIRECT	positive regulation of peptidyl-tyrosine phosphorylation	9	13	1e-09	27.8	1.8e-06	7.4e-08	6.3e-08	3.3e-11
GOTERM_BP_DIRECT	insulin-like growth factor receptor signaling pathway	7	10.1	1e-09	63.5	1.8e-06	7.4e-08	6.3e-08	1.3e-11
GOTERM_BP_DIRECT	cellular response to lipopolysaccharide	11	15.9	1.1e-09	16.3	2e-06	7.9e-08	6.8e-08	6.6e-11
GOTERM_BP_DIRECT	response to xenobiotic stimulus	12	17.4	1.2e-09	13.3	2.1e-06	7.9e-08	6.8e-08	8.4e-11
GOTERM_BP_DIRECT	T cell costimulation	7	10.1	5.2e-09	49.2	9e-06	3.3e-07	2.9e-07	8.9e-11
GOTERM_BP_DIRECT	positive regulation of ERK1 and ERK2 cascade	11	15.9	5.8e-09	13.8	1e-05	3.6e-07	3.1e-07	4e-10
GOTERM_BP_DIRECT	negative regulation of gene expression	12	17.4	9.5e-09	10.9	1.7e-05	5.7e-07	4.9e-07	8.4e-10
GOTERM_BP_DIRECT	cell differentiation	16	23.2	1.2e-08	6.5	2.1e-05	7e-07	6e-07	1.8e-09
GOTERM_BP_DIRECT	positive regulation of nitric oxide biosynthetic process	7	10.1	1.2e-08	42.8	2.2e-05	7e-07	6e-07	2.5e-10
GOTERM_BP_DIRECT	positive regulation of protein kinase B signaling	9	13	1.6e-08	19.6	2.8e-05	8.8e-07	7.6e-07	7.7e-10
GOTERM_BP_DIRECT	cellular response to reactive oxygen species	7	10.1	2.1e-08	39.4	3.6e-05	1.1e-06	9.5e-07	4.6e-10
GOTERM_BP_DIRECT	positive regulation of nitric-oxide synthase activity	6	8.7	2.3e-08	67.5	4e-05	1.2e-06	1e-06	2.7e-10
GOTERM_BP_DIRECT	positive regulation of peptidyl-serine phosphorylation	8	11.6	3.3e-08	24.5	5.7e-05	1.6e-06	1.4e-06	1.2e-09
GOTERM_BP_DIRECT	cellular senescence	7	10.1	3.7e-08	35.8	6.5e-05	1.8e-06	1.6e-06	9.3e-10
GOTERM_BP_DIRECT	Bergmann glial cell differentiation	5	7.2	4.5e-08	127.9	7.8e-05	2.1e-06	1.8e-06	2.2e-10
GOTERM_BP_DIRECT	positive regulation of phosphatidylinositol 3-kinase activity	6	8.7	8.5e-08	52.8	0.00015	3.9e-06	3.4e-06	1.4e-09
GOTERM_BP_DIRECT	response to ethanol	8	11.6	9.3e-08	21	0.00016	4.2e-06	3.6e-06	4.1e-09
GOTERM_BP_DIRECT	positive regulation of MAPK cascade	9	13	9.6e-08	15.6	0.00017	4.2e-06	3.6e-06	5.8e-09
GOTERM_BP_DIRECT	platelet activation	7	10.1	1.4e-07	29	0.00024	5.7e-06	4.9e-06	4.3e-09
GOTERM_BP_DIRECT	positive regulation of tyrosine phosphorylation of STAT protein	7	10.1	1.4e-07	29	0.00024	5.7e-06	4.9e-06	4.3e-09
GOTERM_BP_DIRECT	peptidyl-threonine phosphorylation	7	10.1	1.6e-07	28.1	0.00028	6.6e-06	5.7e-06	5.3e-09
GOTERM_BP_DIRECT	cellular response to cadmium ion	6	8.7	1.8e-07	45.6	0.00032	7.2e-06	6.1e-06	3.4e-09
GOTERM_BP_DIRECT	apoptotic process	14	20.3	1.8e-07	6.4	0.00032	7.2e-06	6.1e-06	2.8e-08
GOTERM_BP_DIRECT	positive regulation of apoptotic process	11	15.9	2e-07	9.5	0.00034	7.5e-06	6.4e-06	2e-08
GOTERM_BP_DIRECT	positive regulation of protein localization to nucleus	6	8.7	2.1e-07	44.4	0.00036	7.8e-06	6.7e-06	4.1e-09
GOTERM_BP_DIRECT	lipopolysaccharide-mediated signaling pathway	6	8.7	3.5e-07	40.2	0.00061	1.3e-05	1.1e-05	7.7e-09
GOTERM_BP_DIRECT	positive regulation of protein import into nucleus	6	8.7	3.9e-07	39.3	0.00069	1.4e-05	1.2e-05	8.9e-09
GOTERM_BP_DIRECT	regulation of type I interferon-mediated signaling pathway	4	5.8	4.1e-07	225.1	0.00072	1.4e-05	1.2e-05	7.3e-10
GOTERM_BP_DIRECT	B cell receptor signaling pathway	8	11.6	4.8e-07	16.6	0.00084	1.7e-05	1.4e-05	2.8e-08
GOTERM_BP_DIRECT	negative regulation of cell proliferation	12	17.4	5e-07	7.4	0.00087	1.7e-05	1.4e-05	6.6e-08
GOTERM_BP_DIRECT	stress-activated MAPK cascade	5	7.2	5.1e-07	74	0.0009	1.7e-05	1.5e-05	5.5e-09
GOTERM_BP_DIRECT	stimulatory C-type lectin receptor signaling pathway	6	8.7	5.6e-07	36.7	0.00097	1.8e-05	1.6e-05	1.4e-08
GOTERM_BP_DIRECT	response to activity	6	8.7	6.2e-07	35.9	0.0011	2e-05	1.7e-05	1.5e-08
GOTERM_BP_DIRECT	cellular response to virus	7	10.1	7.3e-07	21.9	0.0013	2.3e-05	2e-05	3.1e-08
GOTERM_BP_DIRECT	cytokine-mediated signaling pathway	8	11.6	1.1e-06	14.6	0.002	3.4e-05	2.9e-05	7.2e-08
GOTERM_BP_DIRECT	positive regulation of vascular smooth muscle cell proliferation	6	8.7	1.1e-06	31.9	0.002	3.5e-05	3e-05	3.2e-08
GOTERM_BP_DIRECT	negative regulation of transcription from RNA polymerase II promoter	16	23.2	1.3e-06	4.6	0.0022	3.7e-05	3.2e-05	2.7e-07
GOTERM_BP_DIRECT	MAPK cascade	8	11.6	1.3e-06	14.3	0.0022	3.7e-05	3.2e-05	8.4e-08
GOTERM_BP_DIRECT	ERK1 and ERK2 cascade	6	8.7	1.4e-06	30.7	0.0024	4e-05	3.4e-05	4.1e-08
GOTERM_BP_DIRECT	neuron differentiation	8	11.6	2.2e-06	13.2	0.0038	6.1e-05	5.2e-05	1.6e-07
GOTERM_BP_DIRECT	cellular response to unfolded protein	5	7.2	2.6e-06	50.2	0.0046	7.2e-05	6.2e-05	4.5e-08
GOTERM_BP_DIRECT	negative regulation of intrinsic apoptotic signaling pathway	5	7.2	2.6e-06	50.2	0.0046	7.2e-05	6.2e-05	4.5e-08
GOTERM_BP_DIRECT	I-kappaB kinase/NF-kappaB signaling	6	8.7	2.9e-06	26.4	0.0052	7.9e-05	6.8e-05	1e-07
GOTERM_BP_DIRECT	angiogenesis	9	13	3e-06	9.9	0.0052	7.9e-05	6.8e-05	2.9e-07
GOTERM_BP_DIRECT	regulation of early endosome to late endosome transport	4	5.8	3.4e-06	125	0.0059	8.9e-05	7.6e-05	1.8e-08
GOTERM_BP_DIRECT	vascular endothelial growth factor receptor signaling pathway	5	7.2	3.5e-06	46.9	0.0062	9.1e-05	7.8e-05	6.5e-08
GOTERM_BP_DIRECT	positive regulation of endothelial cell migration	6	8.7	3.7e-06	25.2	0.0065	9.3e-05	8e-05	1.4e-07
GOTERM_BP_DIRECT	insulin receptor signaling pathway	6	8.7	3.7e-06	25.2	0.0065	9.3e-05	8e-05	1.4e-07
GOTERM_BP_DIRECT	negative regulation of inflammatory response to antigenic stimulus	5	7.2	4.6e-06	44	0.008	0.00011	9.7e-05	9.1e-08
GOTERM_BP_DIRECT	positive regulation of kinase activity	6	8.7	4.9e-06	23.8	0.0086	0.00012	0.0001	1.9e-07
GOTERM_BP_DIRECT	positive regulation of mitotic cell cycle	5	7.2	5.2e-06	42.6	0.0091	0.00013	0.00011	1.1e-07
GOTERM_BP_DIRECT	negative regulation of extrinsic apoptotic signaling pathway in absence of ligand	5	7.2	8.3e-06	38	0.014	0.0002	0.00017	2e-07
GOTERM_BP_DIRECT	heart development	8	11.6	9.2e-06	10.6	0.016	0.00022	0.00019	8.4e-07
GOTERM_BP_DIRECT	response to nicotine	5	7.2	1.1e-05	35.2	0.02	0.00026	0.00023	2.9e-07
GOTERM_BP_DIRECT	cellular response to fluid shear stress	4	5.8	1.5e-05	80.4	0.025	0.00032	0.00028	1.4e-07
GOTERM_BP_DIRECT	tyrosine phosphorylation of STAT protein	4	5.8	1.5e-05	80.4	0.025	0.00032	0.00028	1.4e-07
GOTERM_BP_DIRECT	interleukin-6-mediated signaling pathway	4	5.8	1.5e-05	80.4	0.025	0.00032	0.00028	1.4e-07
GOTERM_BP_DIRECT	positive regulation of JUN kinase activity	5	7.2	1.5e-05	32.7	0.026	0.00033	0.00028	4.2e-07
GOTERM_BP_DIRECT	response to hydrogen peroxide	5	7.2	1.5e-05	32.7	0.026	0.00033	0.00028	4.2e-07
GOTERM_BP_DIRECT	negative regulation of neuron apoptotic process	7	10.1	1.6e-05	12.8	0.028	0.00035	0.0003	1.2e-06
GOTERM_BP_DIRECT	positive regulation of cell growth	6	8.7	1.8e-05	18.3	0.03	0.00037	0.00032	9.1e-07
GOTERM_BP_DIRECT	positive regulation of JAK-STAT cascade	5	7.2	1.8e-05	31.3	0.032	0.00038	0.00033	5.4e-07
GOTERM_BP_DIRECT	hormone-mediated signaling pathway	5	7.2	1.8e-05	31.3	0.032	0.00038	0.00033	5.4e-07
GOTERM_BP_DIRECT	phosphatidylinositol 3-kinase signaling	5	7.2	2e-05	30.6	0.035	0.00041	0.00035	6e-07
GOTERM_BP_DIRECT	chromatin remodeling	9	13	2e-05	7.6	0.035	0.00041	0.00035	2.6e-06
GOTERM_BP_DIRECT	regulation of protein stability	6	8.7	2.1e-05	17.8	0.035	0.00041	0.00035	1.1e-06
GOTERM_BP_DIRECT	response to hypoxia	7	10.1	2.1e-05	12.2	0.036	0.00042	0.00036	1.7e-06
GOTERM_BP_DIRECT	thymus development	5	7.2	2.2e-05	29.9	0.038	0.00042	0.00036	6.7e-07
GOTERM_BP_DIRECT	positive regulation of phosphoprotein phosphatase activity	4	5.8	2.2e-05	70.3	0.038	0.00042	0.00036	2.6e-07
GOTERM_BP_DIRECT	cellular response to steroid hormone stimulus	4	5.8	2.2e-05	70.3	0.038	0.00042	0.00036	2.6e-07
GOTERM_BP_DIRECT	phosphatidylinositol-mediated signaling	5	7.2	2.4e-05	29.3	0.041	0.00044	0.00038	7.4e-07
GOTERM_BP_DIRECT	Fc-epsilon receptor signaling pathway	5	7.2	2.4e-05	29.3	0.041	0.00044	0.00038	7.4e-07
GOTERM_BP_DIRECT	positive regulation of blood vessel endothelial cell migration	5	7.2	2.6e-05	28.7	0.044	0.00048	0.00041	8.3e-07
GOTERM_BP_DIRECT	cellular response to heat	5	7.2	2.8e-05	28.1	0.048	0.00051	0.00044	9.2e-07
GOTERM_BP_DIRECT	positive regulation of interleukin-6 production	6	8.7	3e-05	16.4	0.052	0.00055	0.00047	1.8e-06
GOTERM_BP_DIRECT	positive regulation of DNA biosynthetic process	4	5.8	3.2e-05	62.5	0.055	0.00057	0.00049	4.3e-07
GOTERM_BP_DIRECT	positive regulation of nitric-oxide synthase biosynthetic process	4	5.8	3.2e-05	62.5	0.055	0.00057	0.00049	4.3e-07
GOTERM_BP_DIRECT	protein kinase B signaling	5	7.2	3.5e-05	26.5	0.06	0.00062	0.00053	1.2e-06
GOTERM_BP_DIRECT	positive regulation of cyclase activity	3	4.3	3.6e-05	281.4	0.061	0.00063	0.00054	4.3e-08
GOTERM_BP_DIRECT	negative regulation of anoikis	4	5.8	3.8e-05	59.2	0.065	0.00066	0.00056	5.4e-07
GOTERM_BP_DIRECT	erythrocyte differentiation	5	7.2	4.1e-05	25.6	0.069	0.0007	0.0006	1.5e-06
GOTERM_BP_DIRECT	integrin-mediated signaling pathway	6	8.7	4.4e-05	15.2	0.074	0.00074	0.00063	2.7e-06
GOTERM_BP_DIRECT	response to mechanical stimulus	5	7.2	4.7e-05	24.7	0.079	0.00079	0.00068	1.8e-06
GOTERM_BP_DIRECT	positive regulation of protein localization to cell surface	4	5.8	5.2e-05	53.6	0.087	0.00086	0.00074	8.4e-07
GOTERM_BP_DIRECT	positive regulation of sequence-specific DNA binding transcription factor activity	6	8.7	5.9e-05	14.3	0.097	0.00096	0.00082	3.9e-06
GOTERM_BP_DIRECT	positive regulation of smooth muscle cell migration	4	5.8	6e-05	51.2	0.1	0.00098	0.00084	1e-06
GOTERM_BP_DIRECT	cellular response to DNA damage stimulus	8	11.6	7.2e-05	7.7	0.12	0.0012	0.00099	9e-06
GOTERM_BP_DIRECT	regulation of Golgi inheritance	3	4.3	7.2e-05	211	0.12	0.0012	0.00099	1.7e-07
GOTERM_BP_DIRECT	glucose metabolic process	5	7.2	7.5e-05	22	0.12	0.0012	0.001	3.2e-06
GOTERM_BP_DIRECT	regulation of circadian rhythm	5	7.2	7.5e-05	22	0.12	0.0012	0.001	3.2e-06
GOTERM_BP_DIRECT	positive regulation of interleukin-8 production	5	7.2	7.9e-05	21.6	0.13	0.0012	0.001	3.4e-06
GOTERM_BP_DIRECT	cellular response to hydrogen peroxide	5	7.2	7.9e-05	21.6	0.13	0.0012	0.001	3.4e-06
GOTERM_BP_DIRECT	cellular response to platelet-derived growth factor stimulus	4	5.8	8.9e-05	45	0.15	0.0013	0.0011	1.7e-06
GOTERM_BP_DIRECT	response to amino acid	4	5.8	8.9e-05	45	0.15	0.0013	0.0011	1.7e-06
GOTERM_BP_DIRECT	protein refolding	4	5.8	8.9e-05	45	0.15	0.0013	0.0011	1.7e-06
GOTERM_BP_DIRECT	steroid hormone mediated signaling pathway	4	5.8	8.9e-05	45	0.15	0.0013	0.0011	1.7e-06
GOTERM_BP_DIRECT	positive regulation of interleukin-17 production	4	5.8	0.0001	43.3	0.16	0.0015	0.0013	2.1e-06
GOTERM_BP_DIRECT	T cell receptor signaling pathway	6	8.7	0.00012	12.3	0.19	0.0017	0.0015	9.2e-06
GOTERM_BP_DIRECT	cellular response to tumor necrosis factor	6	8.7	0.00012	12.3	0.19	0.0017	0.0015	9.2e-06
GOTERM_BP_DIRECT	leukocyte migration	4	5.8	0.00013	40.2	0.2	0.0018	0.0015	2.8e-06
GOTERM_BP_DIRECT	regulation of ERK1 and ERK2 cascade	4	5.8	0.00013	40.2	0.2	0.0018	0.0015	2.8e-06
GOTERM_BP_DIRECT	peptidyl-tyrosine dephosphorylation	4	5.8	0.00014	38.8	0.22	0.002	0.0017	3.2e-06
GOTERM_BP_DIRECT	cellular response to dexamethasone stimulus	4	5.8	0.00014	38.8	0.22	0.002	0.0017	3.2e-06
GOTERM_BP_DIRECT	response to toxic substance	5	7.2	0.00015	18.5	0.23	0.002	0.0017	7.4e-06
GOTERM_BP_DIRECT	multicellular organism development	6	8.7	0.00015	11.7	0.23	0.0021	0.0018	1.2e-05
GOTERM_BP_DIRECT	response to cocaine	4	5.8	0.00016	37.5	0.24	0.0021	0.0018	3.7e-06
GOTERM_BP_DIRECT	neuron apoptotic process	5	7.2	0.00016	18	0.25	0.0022	0.0019	8.5e-06
GOTERM_BP_DIRECT	positive regulation of interferon-gamma production	5	7.2	0.00017	17.8	0.26	0.0023	0.002	9e-06
GOTERM_BP_DIRECT	platelet-derived growth factor receptor-beta signaling pathway	3	4.3	0.00018	140.7	0.27	0.0024	0.0021	8.5e-07
GOTERM_BP_DIRECT	phosphorylation	6	8.7	0.00019	11.2	0.28	0.0025	0.0021	1.6e-05
GOTERM_BP_DIRECT	platelet-derived growth factor receptor signaling pathway	4	5.8	0.00019	35.2	0.28	0.0025	0.0021	4.9e-06
GOTERM_BP_DIRECT	positive regulation of cytosolic calcium ion concentration	6	8.7	0.0002	11	0.29	0.0026	0.0022	1.7e-05
GOTERM_BP_DIRECT	regulation of apoptotic process	7	10.1	0.00021	8.1	0.3	0.0027	0.0023	2.5e-05
GOTERM_BP_DIRECT	response to antibiotic	4	5.8	0.00021	34.1	0.31	0.0027	0.0023	5.5e-06
GOTERM_BP_DIRECT	positive regulation of translation	5	7.2	0.00022	16.7	0.31	0.0028	0.0024	1.2e-05
GOTERM_BP_DIRECT	cellular response to vascular endothelial growth factor stimulus	4	5.8	0.00023	33.1	0.33	0.0029	0.0025	6.3e-06
GOTERM_BP_DIRECT	positive regulation of telomerase activity	4	5.8	0.00023	33.1	0.33	0.0029	0.0025	6.3e-06
GOTERM_BP_DIRECT	positive regulation of apoptotic DNA fragmentation	3	4.3	0.00025	120.6	0.36	0.0031	0.0026	1.5e-06
GOTERM_BP_DIRECT	enzyme linked receptor protein signaling pathway	3	4.3	0.00025	120.6	0.36	0.0031	0.0026	1.5e-06
GOTERM_BP_DIRECT	regulation of platelet aggregation	3	4.3	0.00025	120.6	0.36	0.0031	0.0026	1.5e-06
GOTERM_BP_DIRECT	trachea formation	3	4.3	0.00025	120.6	0.36	0.0031	0.0026	1.5e-06
GOTERM_BP_DIRECT	establishment of cell polarity	4	5.8	0.00027	31.3	0.38	0.0033	0.0028	7.9e-06
GOTERM_BP_DIRECT	positive regulation of glucose import	4	5.8	0.00029	30.4	0.4	0.0035	0.003	8.8e-06
GOTERM_BP_DIRECT	innate immune response	10	14.5	0.00032	4.5	0.43	0.0039	0.0033	7e-05
GOTERM_BP_DIRECT	wound healing	5	7.2	0.00033	15	0.44	0.0039	0.0033	2.1e-05
GOTERM_BP_DIRECT	regulation of cell proliferation	6	8.7	0.00033	9.9	0.44	0.0039	0.0033	3.2e-05
GOTERM_BP_DIRECT	interleukin-2-mediated signaling pathway	3	4.3	0.00033	105.5	0.44	0.0039	0.0033	2.4e-06
GOTERM_BP_DIRECT	signal complex assembly	3	4.3	0.00033	105.5	0.44	0.0039	0.0033	2.4e-06
GOTERM_BP_DIRECT	cellular response to estradiol stimulus	4	5.8	0.00037	28.1	0.48	0.0043	0.0037	1.2e-05
GOTERM_BP_DIRECT	negative regulation of lipid storage	3	4.3	0.00043	93.8	0.53	0.0049	0.0042	3.6e-06
GOTERM_BP_DIRECT	JAK-STAT cascade	4	5.8	0.00046	26.2	0.55	0.0053	0.0045	1.6e-05
GOTERM_BP_DIRECT	cellular response to epidermal growth factor stimulus	4	5.8	0.00049	25.6	0.58	0.0056	0.0048	1.8e-05
GOTERM_BP_DIRECT	positive regulation of tumor necrosis factor production	5	7.2	0.00052	13.3	0.6	0.0059	0.0051	3.8e-05
GOTERM_BP_DIRECT	negative regulation of MAP kinase activity	4	5.8	0.00052	25	0.6	0.0059	0.0051	2e-05
GOTERM_BP_DIRECT	regulation of stress-activated MAPK cascade	3	4.3	0.00053	84.4	0.61	0.006	0.0051	5.1e-06
GOTERM_BP_DIRECT	extracellular matrix disassembly	4	5.8	0.00056	24.5	0.63	0.0062	0.0053	2.1e-05
GOTERM_BP_DIRECT	cellular response to amino acid starvation	4	5.8	0.00056	24.5	0.63	0.0062	0.0053	2.1e-05
GOTERM_BP_DIRECT	response to salt stress	3	4.3	0.00065	76.7	0.68	0.007	0.006	6.9e-06
GOTERM_BP_DIRECT	cellular response to UV-A	3	4.3	0.00065	76.7	0.68	0.007	0.006	6.9e-06
GOTERM_BP_DIRECT	negative regulation of production of miRNAs involved in gene silencing by miRNA	3	4.3	0.00065	76.7	0.68	0.007	0.006	6.9e-06
GOTERM_BP_DIRECT	response to nutrient levels	4	5.8	0.00067	23	0.69	0.0072	0.0062	2.7e-05
GOTERM_BP_DIRECT	response to retinoic acid	4	5.8	0.00067	23	0.69	0.0072	0.0062	2.7e-05
GOTERM_BP_DIRECT	inflammatory response	8	11.6	0.00073	5.3	0.72	0.0078	0.0067	0.00013
GOTERM_BP_DIRECT	response to heat	4	5.8	0.00076	22.1	0.74	0.008	0.0069	3.2e-05
GOTERM_BP_DIRECT	anoikis	3	4.3	0.00078	70.3	0.75	0.0082	0.007	9.2e-06
GOTERM_BP_DIRECT	glucose homeostasis	5	7.2	0.00081	11.8	0.76	0.0084	0.0072	6.5e-05
GOTERM_BP_DIRECT	positive regulation of pri-miRNA transcription from RNA polymerase II promoter	4	5.8	0.00085	21.2	0.77	0.0088	0.0076	3.8e-05
GOTERM_BP_DIRECT	chemotaxis	5	7.2	0.00091	11.4	0.8	0.0093	0.008	7.6e-05
GOTERM_BP_DIRECT	neurotrophin TRK receptor signaling pathway	3	4.3	0.00092	64.9	0.8	0.0093	0.008	1.2e-05
GOTERM_BP_DIRECT	regulation of cell adhesion mediated by integrin	3	4.3	0.00092	64.9	0.8	0.0093	0.008	1.2e-05
GOTERM_BP_DIRECT	intracellular steroid hormone receptor signaling pathway	3	4.3	0.00092	64.9	0.8	0.0093	0.008	1.2e-05
GOTERM_BP_DIRECT	cell surface receptor signaling pathway	7	10.1	0.00093	6.1	0.8	0.0094	0.0081	0.00015
GOTERM_BP_DIRECT	regulation of macroautophagy	4	5.8	0.00095	20.5	0.81	0.0095	0.0081	4.3e-05
GOTERM_BP_DIRECT	positive regulation of neuron apoptotic process	4	5.8	0.0011	19.7	0.84	0.01	0.0089	5e-05
GOTERM_BP_DIRECT	response to glucocorticoid	4	5.8	0.0011	19.7	0.84	0.01	0.0089	5e-05
GOTERM_BP_DIRECT	striated muscle cell differentiation	3	4.3	0.0011	60.3	0.85	0.011	0.009	1.5e-05
GOTERM_BP_DIRECT	response to unfolded protein	4	5.8	0.0011	19.4	0.86	0.011	0.0093	5.4e-05
GOTERM_BP_DIRECT	response to ischemia	4	5.8	0.0012	19.1	0.87	0.011	0.0096	5.7e-05
GOTERM_BP_DIRECT	response to estrogen	4	5.8	0.0012	19.1	0.87	0.011	0.0096	5.7e-05
GOTERM_BP_DIRECT	negative regulation of autophagy	4	5.8	0.0012	19.1	0.87	0.011	0.0096	5.7e-05
GOTERM_BP_DIRECT	regulation of cell adhesion	4	5.8	0.0012	18.8	0.88	0.012	0.01	6.1e-05
GOTERM_BP_DIRECT	sphingosine-1-phosphate signaling pathway	3	4.3	0.0012	56.3	0.88	0.012	0.01	1.9e-05
GOTERM_BP_DIRECT	cellular response to angiotensin	3	4.3	0.0012	56.3	0.88	0.012	0.01	1.9e-05
GOTERM_BP_DIRECT	negative regulation of macroautophagy	3	4.3	0.0012	56.3	0.88	0.012	0.01	1.9e-05
GOTERM_BP_DIRECT	positive regulation of protein kinase activity	4	5.8	0.0013	18.2	0.9	0.012	0.011	7e-05
GOTERM_BP_DIRECT	response to organic cyclic compound	4	5.8	0.0013	18.2	0.9	0.012	0.011	7e-05
GOTERM_BP_DIRECT	negative regulation of cell-cell adhesion	3	4.3	0.0014	52.8	0.91	0.013	0.011	2.3e-05
GOTERM_BP_DIRECT	regulation of ossification	3	4.3	0.0014	52.8	0.91	0.013	0.011	2.3e-05
GOTERM_BP_DIRECT	cellular response to dopamine	3	4.3	0.0014	52.8	0.91	0.013	0.011	2.3e-05
GOTERM_BP_DIRECT	transcription from RNA polymerase II promoter	6	8.7	0.0015	7.1	0.92	0.013	0.012	0.0002
GOTERM_BP_DIRECT	signal transduction in response to DNA damage	3	4.3	0.0016	49.7	0.94	0.014	0.012	2.8e-05
GOTERM_BP_DIRECT	regulation of cellular response to heat	3	4.3	0.0016	49.7	0.94	0.014	0.012	2.8e-05
GOTERM_BP_DIRECT	positive regulation of cellular protein metabolic process	3	4.3	0.0016	49.7	0.94	0.014	0.012	2.8e-05
GOTERM_BP_DIRECT	response to lipopolysaccharide	5	7.2	0.0016	9.8	0.94	0.014	0.012	0.00016
GOTERM_BP_DIRECT	cellular response to transforming growth factor beta stimulus	4	5.8	0.0017	16.8	0.95	0.015	0.013	9.5e-05
GOTERM_BP_DIRECT	positive regulation of T cell proliferation	4	5.8	0.0017	16.8	0.95	0.015	0.013	9.5e-05
GOTERM_BP_DIRECT	response to glucose	4	5.8	0.0018	16.6	0.95	0.015	0.013	0.0001
GOTERM_BP_DIRECT	mammary gland alveolus development	3	4.3	0.0018	46.9	0.96	0.016	0.013	3.4e-05
GOTERM_BP_DIRECT	cellular response to retinoic acid	4	5.8	0.0019	16.1	0.96	0.017	0.014	0.00011
GOTERM_BP_DIRECT	circadian regulation of gene expression	4	5.8	0.002	15.9	0.97	0.017	0.014	0.00012
GOTERM_BP_DIRECT	regulation of protein ubiquitination	3	4.3	0.002	44.4	0.97	0.017	0.014	4e-05
GOTERM_BP_DIRECT	positive regulation of glial cell proliferation	3	4.3	0.002	44.4	0.97	0.017	0.014	4e-05
GOTERM_BP_DIRECT	retinoic acid receptor signaling pathway	3	4.3	0.002	44.4	0.97	0.017	0.014	4e-05
GOTERM_BP_DIRECT	positive regulation of macrophage chemotaxis	3	4.3	0.002	44.4	0.97	0.017	0.014	4e-05
GOTERM_BP_DIRECT	regulation of release of sequestered calcium ion into cytosol	3	4.3	0.002	44.4	0.97	0.017	0.014	4e-05
GOTERM_BP_DIRECT	negative regulation of B cell proliferation	3	4.3	0.002	44.4	0.97	0.017	0.014	4e-05
GOTERM_BP_DIRECT	positive regulation of bone resorption	3	4.3	0.002	44.4	0.97	0.017	0.014	4e-05
GOTERM_BP_DIRECT	labyrinthine layer blood vessel development	3	4.3	0.0022	42.2	0.98	0.018	0.016	4.7e-05
GOTERM_BP_DIRECT	response to muscle stretch	3	4.3	0.0022	42.2	0.98	0.018	0.016	4.7e-05
GOTERM_BP_DIRECT	platelet formation	3	4.3	0.0022	42.2	0.98	0.018	0.016	4.7e-05
GOTERM_BP_DIRECT	response to insulin	4	5.8	0.0023	15	0.98	0.019	0.016	0.00015
GOTERM_BP_DIRECT	cellular response to mechanical stimulus	4	5.8	0.0024	14.8	0.99	0.02	0.017	0.00015
GOTERM_BP_DIRECT	protein catabolic process	4	5.8	0.0024	14.8	0.99	0.02	0.017	0.00015
GOTERM_BP_DIRECT	face development	3	4.3	0.0024	40.2	0.99	0.02	0.017	5.5e-05
GOTERM_BP_DIRECT	positive regulation of MAP kinase activity	4	5.8	0.0025	14.6	0.99	0.02	0.017	0.00016
GOTERM_BP_DIRECT	tumor necrosis factor-mediated signaling pathway	4	5.8	0.0026	14.4	0.99	0.021	0.018	0.00017
GOTERM_BP_DIRECT	rhythmic process	4	5.8	0.0026	14.4	0.99	0.021	0.018	0.00017
GOTERM_BP_DIRECT	TOR signaling	3	4.3	0.0027	38.4	0.99	0.021	0.018	6.3e-05
GOTERM_BP_DIRECT	chaperone-mediated protein complex assembly	3	4.3	0.0027	38.4	0.99	0.021	0.018	6.3e-05
GOTERM_BP_DIRECT	telomere maintenance via telomerase	3	4.3	0.0027	38.4	0.99	0.021	0.018	6.3e-05
GOTERM_BP_DIRECT	positive regulation of NF-kappaB transcription factor activity	5	7.2	0.0027	8.5	0.99	0.021	0.018	0.0003
GOTERM_BP_DIRECT	regulation of protein complex assembly	3	4.3	0.0029	36.7	0.99	0.023	0.019	7.2e-05
GOTERM_BP_DIRECT	positive regulation of lipid biosynthetic process	3	4.3	0.0029	36.7	0.99	0.023	0.019	7.2e-05
GOTERM_BP_DIRECT	negative regulation of ERK1 and ERK2 cascade	4	5.8	0.0031	13.6	1	0.024	0.021	0.00022
GOTERM_BP_DIRECT	regulation of sequence-specific DNA binding transcription factor activity	3	4.3	0.0034	33.8	1	0.026	0.023	9.3e-05
GOTERM_BP_DIRECT	regulation of cytoskeleton organization	3	4.3	0.0034	33.8	1	0.026	0.023	9.3e-05
GOTERM_BP_DIRECT	skeletal muscle contraction	3	4.3	0.0037	32.5	1	0.028	0.024	0.00011
GOTERM_BP_DIRECT	B cell homeostasis	3	4.3	0.0037	32.5	1	0.028	0.024	0.00011
GOTERM_BP_DIRECT	regulation of protein localization	4	5.8	0.004	12.4	1	0.03	0.026	0.00031
GOTERM_BP_DIRECT	positive regulation of immunoglobulin production	3	4.3	0.004	31.3	1	0.03	0.026	0.00012
GOTERM_BP_DIRECT	interferon-gamma-mediated signaling pathway	3	4.3	0.004	31.3	1	0.03	0.026	0.00012
GOTERM_BP_DIRECT	multicellular organism growth	4	5.8	0.0041	12.2	1	0.031	0.027	0.00032
GOTERM_BP_DIRECT	response to radiation	3	4.3	0.0043	30.1	1	0.032	0.028	0.00013
GOTERM_BP_DIRECT	regulation of actin cytoskeleton organization	4	5.8	0.0044	12	1	0.033	0.028	0.00035
GOTERM_BP_DIRECT	cell proliferation	5	7.2	0.0044	7.4	1	0.033	0.028	0.00058
GOTERM_BP_DIRECT	focal adhesion assembly	3	4.3	0.0046	29.1	1	0.034	0.029	0.00015
GOTERM_BP_DIRECT	thyroid gland development	3	4.3	0.0046	29.1	1	0.034	0.029	0.00015
GOTERM_BP_DIRECT	positive regulation of lamellipodium assembly	3	4.3	0.0049	28.1	1	0.036	0.031	0.00016
GOTERM_BP_DIRECT	cellular response to interferon-gamma	4	5.8	0.0051	11.4	1	0.037	0.032	0.00043
GOTERM_BP_DIRECT	positive regulation of cardiac muscle cell proliferation	3	4.3	0.0053	27.2	1	0.038	0.033	0.00018
GOTERM_BP_DIRECT	endodermal cell differentiation	3	4.3	0.0053	27.2	1	0.038	0.033	0.00018
GOTERM_BP_DIRECT	negative regulation of transforming growth factor beta receptor signaling pathway	4	5.8	0.0054	11.1	1	0.038	0.033	0.00046
GOTERM_BP_DIRECT	positive regulation of reactive oxygen species metabolic process	3	4.3	0.006	25.6	1	0.043	0.037	0.00022
GOTERM_BP_DIRECT	chaperone mediated protein folding requiring cofactor	3	4.3	0.0063	24.8	1	0.045	0.039	0.00024
GOTERM_BP_DIRECT	male gonad development	4	5.8	0.0066	10.3	1	0.047	0.04	0.00061
GOTERM_BP_DIRECT	oligodendrocyte differentiation	3	4.3	0.0067	24.1	1	0.047	0.04	0.00026
GOTERM_BP_DIRECT	regulation of hepatocyte growth factor receptor signaling pathway	2	2.9	0.007	281.4	1	0.049	0.042	1.2e-05
GOTERM_BP_DIRECT	abortive mitotic cell cycle	2	2.9	0.007	281.4	1	0.049	0.042	1.2e-05
GOTERM_BP_DIRECT	response to tumor necrosis factor	3	4.3	0.0071	23.4	1	0.049	0.042	0.00028
GOTERM_BP_DIRECT	negative regulation of endothelial cell apoptotic process	3	4.3	0.0071	23.4	1	0.049	0.042	0.00028
GOTERM_BP_DIRECT	T cell homeostasis	3	4.3	0.0074	22.8	1	0.051	0.044	0.00031
GOTERM_BP_DIRECT	regulation of angiogenesis	3	4.3	0.0074	22.8	1	0.051	0.044	0.00031
GOTERM_BP_DIRECT	negative regulation of extrinsic apoptotic signaling pathway	3	4.3	0.0074	22.8	1	0.051	0.044	0.00031
GOTERM_BP_DIRECT	placenta development	3	4.3	0.0078	22.2	1	0.053	0.046	0.00033
GOTERM_BP_DIRECT	negative regulation of protein complex assembly	3	4.3	0.0078	22.2	1	0.053	0.046	0.00033
GOTERM_BP_DIRECT	adaptive immune response	7	10.1	0.0084	3.9	1	0.057	0.049	0.0021
GOTERM_BP_DIRECT	negative regulation of insulin receptor signaling pathway	3	4.3	0.0087	21.1	1	0.059	0.05	0.00039
GOTERM_BP_DIRECT	response to hormone	3	4.3	0.0091	20.6	1	0.061	0.052	0.00042
GOTERM_BP_DIRECT	ovarian follicle development	3	4.3	0.0091	20.6	1	0.061	0.052	0.00042
GOTERM_BP_DIRECT	collagen catabolic process	3	4.3	0.0091	20.6	1	0.061	0.052	0.00042
GOTERM_BP_DIRECT	positive regulation of protein serine/threonine kinase activity	3	4.3	0.0095	20.1	1	0.063	0.054	0.00045
GOTERM_BP_DIRECT	cardiac muscle contraction	3	4.3	0.0095	20.1	1	0.063	0.054	0.00045
GOTERM_BP_DIRECT	germ cell development	3	4.3	0.01	19.2	1	0.069	0.059	0.00051
GOTERM_BP_DIRECT	cardiac neural crest cell development involved in heart development	2	2.9	0.01	187.6	1	0.069	0.059	3.7e-05
GOTERM_BP_DIRECT	cerebellar cortex formation	2	2.9	0.01	187.6	1	0.069	0.059	3.7e-05
GOTERM_BP_DIRECT	regulation of insulin secretion	3	4.3	0.011	18.3	1	0.074	0.063	0.00058
GOTERM_BP_DIRECT	cellular response to organic cyclic compound	3	4.3	0.011	18.3	1	0.074	0.063	0.00058
GOTERM_BP_DIRECT	positive regulation of B cell proliferation	3	4.3	0.011	18.3	1	0.074	0.063	0.00058
GOTERM_BP_DIRECT	cellular response to hypoxia	4	5.8	0.012	8.4	1	0.075	0.065	0.0013
GOTERM_BP_DIRECT	positive regulation of cysteine-type endopeptidase activity involved in apoptotic process	3	4.3	0.014	16.6	1	0.086	0.074	0.00079
GOTERM_BP_DIRECT	intrinsic apoptotic signaling pathway in response to DNA damage	3	4.3	0.014	16.6	1	0.086	0.074	0.00079
GOTERM_BP_DIRECT	regulation of B cell apoptotic process	2	2.9	0.014	140.7	1	0.086	0.074	7.4e-05
GOTERM_BP_DIRECT	positive regulation of synoviocyte proliferation	2	2.9	0.014	140.7	1	0.086	0.074	7.4e-05
GOTERM_BP_DIRECT	response to leucine	2	2.9	0.014	140.7	1	0.086	0.074	7.4e-05
GOTERM_BP_DIRECT	ERBB signaling pathway	2	2.9	0.014	140.7	1	0.086	0.074	7.4e-05
GOTERM_BP_DIRECT	regulation of interferon-gamma-mediated signaling pathway	2	2.9	0.014	140.7	1	0.086	0.074	7.4e-05
GOTERM_BP_DIRECT	insulin receptor recycling	2	2.9	0.014	140.7	1	0.086	0.074	7.4e-05
GOTERM_BP_DIRECT	positive regulation of microtubule binding	2	2.9	0.014	140.7	1	0.086	0.074	7.4e-05
GOTERM_BP_DIRECT	leukocyte activation involved in immune response	2	2.9	0.014	140.7	1	0.086	0.074	7.4e-05
GOTERM_BP_DIRECT	telomerase holoenzyme complex assembly	2	2.9	0.014	140.7	1	0.086	0.074	7.4e-05
GOTERM_BP_DIRECT	cellular response to molecule of fungal origin	2	2.9	0.014	140.7	1	0.086	0.074	7.4e-05
GOTERM_BP_DIRECT	response to epidermal growth factor	2	2.9	0.014	140.7	1	0.086	0.074	7.4e-05
GOTERM_BP_DIRECT	negative regulation of inflammatory response	4	5.8	0.014	7.8	1	0.088	0.076	0.0018
GOTERM_BP_DIRECT	positive regulation of stress fiber assembly	3	4.3	0.015	15.9	1	0.091	0.078	0.00089
GOTERM_BP_DIRECT	macromolecular complex assembly	4	5.8	0.015	7.6	1	0.093	0.079	0.0019
GOTERM_BP_DIRECT	positive regulation of epithelial to mesenchymal transition	3	4.3	0.015	15.6	1	0.093	0.08	0.00094
GOTERM_BP_DIRECT	positive regulation of protein complex assembly	3	4.3	0.015	15.6	1	0.093	0.08	0.00094
GOTERM_BP_DIRECT	positive regulation of fibroblast proliferation	3	4.3	0.016	15.3	1	0.096	0.083	0.00099
GOTERM_BP_DIRECT	protein dephosphorylation	4	5.8	0.016	7.5	1	0.096	0.083	0.0021
GOTERM_BP_DIRECT	negative regulation of cysteine-type endopeptidase activity involved in apoptotic process	3	4.3	0.016	15.1	1	0.099	0.085	0.001
GOTERM_BP_DIRECT	NIK/NF-kappaB signaling	3	4.3	0.016	15.1	1	0.099	0.085	0.001
GOTERM_BP_DIRECT	negative regulation of transcription, DNA-templated	7	10.1	0.017	3.3	1	0.1	0.086	0.0048
GOTERM_BP_DIRECT	negative regulation of I-kappaB kinase/NF-kappaB signaling	3	4.3	0.017	14.8	1	0.1	0.087	0.0011
GOTERM_BP_DIRECT	positive regulation of protein complex disassembly	2	2.9	0.017	112.5	1	0.1	0.087	0.00012
GOTERM_BP_DIRECT	ERBB2-ERBB4 signaling pathway	2	2.9	0.017	112.5	1	0.1	0.087	0.00012
GOTERM_BP_DIRECT	caveolin-mediated endocytosis	2	2.9	0.017	112.5	1	0.1	0.087	0.00012
GOTERM_BP_DIRECT	negative regulation of muscle cell apoptotic process	2	2.9	0.017	112.5	1	0.1	0.087	0.00012
GOTERM_BP_DIRECT	negative regulation of myosin-light-chain-phosphatase activity	2	2.9	0.017	112.5	1	0.1	0.087	0.00012
GOTERM_BP_DIRECT	histamine secretion by mast cell	2	2.9	0.017	112.5	1	0.1	0.087	0.00012
GOTERM_BP_DIRECT	positive regulation of protein transport	2	2.9	0.017	112.5	1	0.1	0.087	0.00012
GOTERM_BP_DIRECT	response to nutrient	3	4.3	0.018	14.6	1	0.1	0.087	0.0012
GOTERM_BP_DIRECT	positive regulation of cell differentiation	3	4.3	0.018	14.6	1	0.1	0.087	0.0012
GOTERM_BP_DIRECT	cell fate commitment	3	4.3	0.018	14.6	1	0.1	0.087	0.0012
GOTERM_BP_DIRECT	actin cytoskeleton reorganization	3	4.3	0.018	14.3	1	0.1	0.089	0.0012
GOTERM_BP_DIRECT	positive regulation of cell adhesion	3	4.3	0.018	14.3	1	0.1	0.089	0.0012
GOTERM_BP_DIRECT	cellular response to amino acid stimulus	3	4.3	0.018	14.3	1	0.1	0.089	0.0012
GOTERM_BP_DIRECT	JNK cascade	3	4.3	0.019	14.1	1	0.11	0.091	0.0013
GOTERM_BP_DIRECT	negative regulation of neuron death	3	4.3	0.019	13.8	1	0.11	0.093	0.0013
GOTERM_BP_DIRECT	humoral immune response	3	4.3	0.019	13.8	1	0.11	0.093	0.0013
GOTERM_BP_DIRECT	neurogenesis	3	4.3	0.019	13.8	1	0.11	0.093	0.0013
GOTERM_BP_DIRECT	positive regulation of angiogenesis	4	5.8	0.02	6.9	1	0.11	0.095	0.0028
GOTERM_BP_DIRECT	interleukin-5-mediated signaling pathway	2	2.9	0.021	93.8	1	0.11	0.097	0.00019
GOTERM_BP_DIRECT	regulation of epithelial cell migration	2	2.9	0.021	93.8	1	0.11	0.097	0.00019
GOTERM_BP_DIRECT	positive regulation of killing of cells of other organism	2	2.9	0.021	93.8	1	0.11	0.097	0.00019
GOTERM_BP_DIRECT	response to stress	2	2.9	0.021	93.8	1	0.11	0.097	0.00019
GOTERM_BP_DIRECT	negative regulation of leukocyte cell-cell adhesion	2	2.9	0.021	93.8	1	0.11	0.097	0.00019
GOTERM_BP_DIRECT	positive regulation of vitamin D receptor signaling pathway	2	2.9	0.021	93.8	1	0.11	0.097	0.00019
GOTERM_BP_DIRECT	negative regulation of bicellular tight junction assembly	2	2.9	0.021	93.8	1	0.11	0.097	0.00019
GOTERM_BP_DIRECT	activation of Janus kinase activity	2	2.9	0.021	93.8	1	0.11	0.097	0.00019
GOTERM_BP_DIRECT	negative regulation of mitochondrial depolarization	2	2.9	0.021	93.8	1	0.11	0.097	0.00019
GOTERM_BP_DIRECT	positive regulation of interleukin-1 beta production	3	4.3	0.021	13.2	1	0.11	0.099	0.0015
GOTERM_BP_DIRECT	G1/S transition of mitotic cell cycle	3	4.3	0.022	12.8	1	0.12	0.1	0.0017
GOTERM_BP_DIRECT	positive regulation of cytokine production	3	4.3	0.022	12.8	1	0.12	0.1	0.0017
GOTERM_BP_DIRECT	learning or memory	3	4.3	0.022	12.8	1	0.12	0.1	0.0017
GOTERM_BP_DIRECT	cellular response to xenobiotic stimulus	3	4.3	0.023	12.6	1	0.12	0.11	0.0017
GOTERM_BP_DIRECT	interleukin-9-mediated signaling pathway	2	2.9	0.024	80.4	1	0.12	0.11	0.00026
GOTERM_BP_DIRECT	interleukin-3-mediated signaling pathway	2	2.9	0.024	80.4	1	0.12	0.11	0.00026
GOTERM_BP_DIRECT	inflammatory response to wounding	2	2.9	0.024	80.4	1	0.12	0.11	0.00026
GOTERM_BP_DIRECT	interleukin-4-mediated signaling pathway	2	2.9	0.024	80.4	1	0.12	0.11	0.00026
GOTERM_BP_DIRECT	cellular response to progesterone stimulus	2	2.9	0.024	80.4	1	0.12	0.11	0.00026
GOTERM_BP_DIRECT	luteolysis	2	2.9	0.024	80.4	1	0.12	0.11	0.00026
GOTERM_BP_DIRECT	negative regulation of hepatocyte apoptotic process	2	2.9	0.024	80.4	1	0.12	0.11	0.00026
GOTERM_BP_DIRECT	positive regulation of I-kappaB phosphorylation	2	2.9	0.024	80.4	1	0.12	0.11	0.00026
GOTERM_BP_DIRECT	vascular endothelial growth factor production	2	2.9	0.024	80.4	1	0.12	0.11	0.00026
GOTERM_BP_DIRECT	regulation of cellular pH	2	2.9	0.024	80.4	1	0.12	0.11	0.00026
GOTERM_BP_DIRECT	regulation of cellular respiration	2	2.9	0.024	80.4	1	0.12	0.11	0.00026
GOTERM_BP_DIRECT	chaperone-mediated autophagy	2	2.9	0.024	80.4	1	0.12	0.11	0.00026
GOTERM_BP_DIRECT	central nervous system neuron axonogenesis	2	2.9	0.024	80.4	1	0.12	0.11	0.00026
GOTERM_BP_DIRECT	circadian rhythm	3	4.3	0.024	12.2	1	0.12	0.11	0.0019
GOTERM_BP_DIRECT	hippocampus development	3	4.3	0.024	12.2	1	0.12	0.11	0.0019
GOTERM_BP_DIRECT	post-embryonic development	3	4.3	0.025	12.1	1	0.13	0.11	0.002
GOTERM_BP_DIRECT	phagocytosis	3	4.3	0.025	12.1	1	0.13	0.11	0.002
GOTERM_BP_DIRECT	apoptotic signaling pathway	3	4.3	0.026	11.9	1	0.13	0.11	0.0021
GOTERM_BP_DIRECT	post-translational protein modification	3	4.3	0.027	11.6	1	0.14	0.12	0.0022
GOTERM_BP_DIRECT	extracellular matrix organization	4	5.8	0.028	6.1	1	0.14	0.12	0.0043
GOTERM_BP_DIRECT	prostate gland epithelium morphogenesis	2	2.9	0.028	70.3	1	0.14	0.12	0.00034
GOTERM_BP_DIRECT	outer ear morphogenesis	2	2.9	0.028	70.3	1	0.14	0.12	0.00034
GOTERM_BP_DIRECT	blood vessel maturation	2	2.9	0.028	70.3	1	0.14	0.12	0.00034
GOTERM_BP_DIRECT	positive regulation of microtubule nucleation	2	2.9	0.028	70.3	1	0.14	0.12	0.00034
GOTERM_BP_DIRECT	DNA damage induced protein phosphorylation	2	2.9	0.028	70.3	1	0.14	0.12	0.00034
GOTERM_BP_DIRECT	response to fluid shear stress	2	2.9	0.028	70.3	1	0.14	0.12	0.00034
GOTERM_BP_DIRECT	cellular response to nicotine	2	2.9	0.028	70.3	1	0.14	0.12	0.00034
GOTERM_BP_DIRECT	activated T cell proliferation	2	2.9	0.028	70.3	1	0.14	0.12	0.00034
GOTERM_BP_DIRECT	positive regulation of endothelial cell proliferation	3	4.3	0.028	11.3	1	0.14	0.12	0.0024
GOTERM_BP_DIRECT	cellular response to starvation	3	4.3	0.028	11.3	1	0.14	0.12	0.0024
GOTERM_BP_DIRECT	negative regulation of protein binding	3	4.3	0.029	11.1	1	0.14	0.12	0.0025
GOTERM_BP_DIRECT	tissue remodeling	2	2.9	0.031	62.5	1	0.15	0.13	0.00044
GOTERM_BP_DIRECT	interleukin-12-mediated signaling pathway	2	2.9	0.031	62.5	1	0.15	0.13	0.00044
GOTERM_BP_DIRECT	positive regulation of tau-protein kinase activity	2	2.9	0.031	62.5	1	0.15	0.13	0.00044
GOTERM_BP_DIRECT	regulation of establishment of endothelial barrier	2	2.9	0.031	62.5	1	0.15	0.13	0.00044
GOTERM_BP_DIRECT	negative regulation of heart contraction	2	2.9	0.031	62.5	1	0.15	0.13	0.00044
GOTERM_BP_DIRECT	positive regulation of NK T cell proliferation	2	2.9	0.031	62.5	1	0.15	0.13	0.00044
GOTERM_BP_DIRECT	hepatocyte growth factor receptor signaling pathway	2	2.9	0.031	62.5	1	0.15	0.13	0.00044
GOTERM_BP_DIRECT	T-helper 17 cell lineage commitment	2	2.9	0.031	62.5	1	0.15	0.13	0.00044
GOTERM_BP_DIRECT	negative regulation of protein metabolic process	2	2.9	0.031	62.5	1	0.15	0.13	0.00044
GOTERM_BP_DIRECT	hematopoietic progenitor cell differentiation	3	4.3	0.032	10.6	1	0.15	0.13	0.0029
GOTERM_BP_DIRECT	positive regulation of I-kappaB kinase/NF-kappaB signaling	4	5.8	0.033	5.7	1	0.16	0.13	0.0055
GOTERM_BP_DIRECT	negative regulation of inclusion body assembly	2	2.9	0.034	56.3	1	0.16	0.14	0.00055
GOTERM_BP_DIRECT	positive regulation of glucose metabolic process	2	2.9	0.034	56.3	1	0.16	0.14	0.00055
GOTERM_BP_DIRECT	positive regulation of phospholipase C activity	2	2.9	0.034	56.3	1	0.16	0.14	0.00055
GOTERM_BP_DIRECT	histone H4 deacetylation	2	2.9	0.034	56.3	1	0.16	0.14	0.00055
GOTERM_BP_DIRECT	negative regulation of receptor activity	2	2.9	0.034	56.3	1	0.16	0.14	0.00055
GOTERM_BP_DIRECT	regulation of bone resorption	2	2.9	0.034	56.3	1	0.16	0.14	0.00055
GOTERM_BP_DIRECT	lymph vessel development	2	2.9	0.034	56.3	1	0.16	0.14	0.00055
GOTERM_BP_DIRECT	modulation of synaptic transmission	3	4.3	0.035	10	1	0.16	0.14	0.0033
GOTERM_BP_DIRECT	regulation of transcription from RNA polymerase II promoter	12	17.4	0.037	1.9	1	0.17	0.15	0.018
GOTERM_BP_DIRECT	regulation of cytokine production involved in inflammatory response	2	2.9	0.038	51.2	1	0.17	0.15	0.00067
GOTERM_BP_DIRECT	regulation of biological quality	2	2.9	0.038	51.2	1	0.17	0.15	0.00067
GOTERM_BP_DIRECT	progesterone receptor signaling pathway	2	2.9	0.038	51.2	1	0.17	0.15	0.00067
GOTERM_BP_DIRECT	positive regulation of podosome assembly	2	2.9	0.038	51.2	1	0.17	0.15	0.00067
GOTERM_BP_DIRECT	positive regulation of cell size	2	2.9	0.038	51.2	1	0.17	0.15	0.00067
GOTERM_BP_DIRECT	cellular response to testosterone stimulus	2	2.9	0.038	51.2	1	0.17	0.15	0.00067
GOTERM_BP_DIRECT	interleukin-15-mediated signaling pathway	2	2.9	0.038	51.2	1	0.17	0.15	0.00067
GOTERM_BP_DIRECT	type III interferon signaling pathway	2	2.9	0.038	51.2	1	0.17	0.15	0.00067
GOTERM_BP_DIRECT	response to amine	2	2.9	0.038	51.2	1	0.17	0.15	0.00067
GOTERM_BP_DIRECT	B cell differentiation	3	4.3	0.04	9.4	1	0.18	0.15	0.004
GOTERM_BP_DIRECT	response to estradiol	3	4.3	0.041	9.3	1	0.18	0.16	0.0042
GOTERM_BP_DIRECT	positive regulation of positive chemotaxis	2	2.9	0.041	46.9	1	0.18	0.16	0.0008
GOTERM_BP_DIRECT	cellular response to granulocyte macrophage colony-stimulating factor stimulus	2	2.9	0.041	46.9	1	0.18	0.16	0.0008
GOTERM_BP_DIRECT	p38MAPK cascade	2	2.9	0.041	46.9	1	0.18	0.16	0.0008
GOTERM_BP_DIRECT	stress-activated protein kinase signaling cascade	2	2.9	0.041	46.9	1	0.18	0.16	0.0008
GOTERM_BP_DIRECT	positive regulation of keratinocyte migration	2	2.9	0.041	46.9	1	0.18	0.16	0.0008
GOTERM_BP_DIRECT	positive regulation of production of miRNAs involved in gene silencing by miRNA	2	2.9	0.041	46.9	1	0.18	0.16	0.0008
GOTERM_BP_DIRECT	negative regulation of B cell apoptotic process	2	2.9	0.041	46.9	1	0.18	0.16	0.0008
GOTERM_BP_DIRECT	positive regulation of receptor activity	2	2.9	0.041	46.9	1	0.18	0.16	0.0008
GOTERM_BP_DIRECT	calcium-mediated signaling	3	4.3	0.041	9.2	1	0.18	0.16	0.0043
GOTERM_BP_DIRECT	cellular response to oxidative stress	3	4.3	0.042	9.1	1	0.19	0.16	0.0044
GOTERM_BP_DIRECT	negative regulation of sequence-specific DNA binding transcription factor activity	3	4.3	0.043	9	1	0.19	0.16	0.0046
GOTERM_BP_DIRECT	positive regulation of osteoblast proliferation	2	2.9	0.045	43.3	1	0.19	0.16	0.00095
GOTERM_BP_DIRECT	positive regulation of intracellular estrogen receptor signaling pathway	2	2.9	0.045	43.3	1	0.19	0.16	0.00095
GOTERM_BP_DIRECT	positive regulation of leukocyte adhesion to vascular endothelial cell	2	2.9	0.045	43.3	1	0.19	0.16	0.00095
GOTERM_BP_DIRECT	lung morphogenesis	2	2.9	0.045	43.3	1	0.19	0.16	0.00095
GOTERM_BP_DIRECT	regulation of osteoclast differentiation	2	2.9	0.045	43.3	1	0.19	0.16	0.00095
GOTERM_BP_DIRECT	transcytosis	2	2.9	0.045	43.3	1	0.19	0.16	0.00095
GOTERM_BP_DIRECT	negative regulation of hippo signaling	2	2.9	0.045	43.3	1	0.19	0.16	0.00095
GOTERM_BP_DIRECT	regulation of vascular permeability	2	2.9	0.045	43.3	1	0.19	0.16	0.00095
GOTERM_BP_DIRECT	myoblast proliferation	2	2.9	0.045	43.3	1	0.19	0.16	0.00095
GOTERM_BP_DIRECT	positive regulation of platelet aggregation	2	2.9	0.045	43.3	1	0.19	0.16	0.00095
GOTERM_BP_DIRECT	positive regulation of natural killer cell proliferation	2	2.9	0.045	43.3	1	0.19	0.16	0.00095
GOTERM_BP_DIRECT	growth hormone receptor signaling pathway	2	2.9	0.045	43.3	1	0.19	0.16	0.00095
GOTERM_BP_DIRECT	positive regulation of T-helper 17 type immune response	2	2.9	0.045	43.3	1	0.19	0.16	0.00095
GOTERM_BP_DIRECT	protein stabilization	4	5.8	0.045	5	1	0.19	0.16	0.0087
GOTERM_BP_DIRECT	regulation of JAK-STAT cascade	2	2.9	0.048	40.2	1	0.2	0.17	0.0011
GOTERM_BP_DIRECT	response to beta-amyloid	2	2.9	0.048	40.2	1	0.2	0.17	0.0011
GOTERM_BP_DIRECT	regulation of cell-matrix adhesion	2	2.9	0.048	40.2	1	0.2	0.17	0.0011
GOTERM_BP_DIRECT	mammary gland epithelial cell differentiation	2	2.9	0.048	40.2	1	0.2	0.17	0.0011
GOTERM_BP_DIRECT	positive regulation of B cell differentiation	2	2.9	0.048	40.2	1	0.2	0.17	0.0011
GOTERM_BP_DIRECT	axonogenesis	3	4.3	0.048	8.4	1	0.2	0.17	0.0054
GOTERM_BP_DIRECT	cellular response to insulin stimulus	3	4.3	0.049	8.4	1	0.2	0.17	0.0056
GOTERM_BP_DIRECT	positive regulation of fibroblast migration	2	2.9	0.051	37.5	1	0.21	0.18	0.0013
GOTERM_BP_DIRECT	protein deacetylation	2	2.9	0.051	37.5	1	0.21	0.18	0.0013
GOTERM_BP_DIRECT	macrophage activation involved in immune response	2	2.9	0.051	37.5	1	0.21	0.18	0.0013
GOTERM_BP_DIRECT	response to hyperoxia	2	2.9	0.051	37.5	1	0.21	0.18	0.0013
GOTERM_BP_DIRECT	positive regulation of myotube differentiation	2	2.9	0.051	37.5	1	0.21	0.18	0.0013
GOTERM_BP_DIRECT	histone H3 deacetylation	2	2.9	0.051	37.5	1	0.21	0.18	0.0013
GOTERM_BP_DIRECT	behavioral response to pain	2	2.9	0.055	35.2	1	0.22	0.19	0.0014
GOTERM_BP_DIRECT	neurotransmitter receptor localization to postsynaptic specialization membrane	2	2.9	0.055	35.2	1	0.22	0.19	0.0014
GOTERM_BP_DIRECT	endothelial cell differentiation	2	2.9	0.055	35.2	1	0.22	0.19	0.0014
GOTERM_BP_DIRECT	positive regulation of macrophage differentiation	2	2.9	0.055	35.2	1	0.22	0.19	0.0014
GOTERM_BP_DIRECT	embryonic digestive tract development	2	2.9	0.055	35.2	1	0.22	0.19	0.0014
GOTERM_BP_DIRECT	vascular endothelial growth factor signaling pathway	2	2.9	0.055	35.2	1	0.22	0.19	0.0014
GOTERM_BP_DIRECT	positive regulation of cell adhesion mediated by integrin	2	2.9	0.055	35.2	1	0.22	0.19	0.0014
GOTERM_BP_DIRECT	positive regulation of inflammatory response	3	4.3	0.056	7.7	1	0.23	0.19	0.0069
GOTERM_BP_DIRECT	response to virus	3	4.3	0.057	7.7	1	0.23	0.2	0.0071
GOTERM_BP_DIRECT	intrinsic apoptotic signaling pathway in response to oxidative stress	2	2.9	0.058	33.1	1	0.23	0.2	0.0016
GOTERM_BP_DIRECT	axon regeneration	2	2.9	0.058	33.1	1	0.23	0.2	0.0016
GOTERM_BP_DIRECT	negative regulation of protein serine/threonine kinase activity	2	2.9	0.058	33.1	1	0.23	0.2	0.0016
GOTERM_BP_DIRECT	positive regulation of telomere capping	2	2.9	0.058	33.1	1	0.23	0.2	0.0016
GOTERM_BP_DIRECT	proteolysis	5	7.2	0.061	3.3	1	0.24	0.21	0.017
GOTERM_BP_DIRECT	stress fiber assembly	2	2.9	0.061	31.3	1	0.24	0.21	0.0018
GOTERM_BP_DIRECT	uterus development	2	2.9	0.061	31.3	1	0.24	0.21	0.0018
GOTERM_BP_DIRECT	protein metabolic process	2	2.9	0.061	31.3	1	0.24	0.21	0.0018
GOTERM_BP_DIRECT	positive regulation of neuron projection development	3	4.3	0.063	7.2	1	0.25	0.21	0.0084
GOTERM_BP_DIRECT	negative regulation of endoplasmic reticulum stress-induced intrinsic apoptotic signaling pathway	2	2.9	0.065	29.6	1	0.25	0.22	0.002
GOTERM_BP_DIRECT	epithelial cell apoptotic process	2	2.9	0.065	29.6	1	0.25	0.22	0.002
GOTERM_BP_DIRECT	negative regulation of interleukin-12 production	2	2.9	0.065	29.6	1	0.25	0.22	0.002
GOTERM_BP_DIRECT	positive regulation of transcription from RNA polymerase III promoter	2	2.9	0.068	28.1	1	0.26	0.23	0.0023
GOTERM_BP_DIRECT	positive regulation of protein ubiquitination involved in ubiquitin-dependent protein catabolic process	2	2.9	0.068	28.1	1	0.26	0.23	0.0023
GOTERM_BP_DIRECT	positive regulation of NLRP3 inflammasome complex assembly	2	2.9	0.068	28.1	1	0.26	0.23	0.0023
GOTERM_BP_DIRECT	response to oxidative stress	3	4.3	0.068	6.9	1	0.26	0.23	0.0094
GOTERM_BP_DIRECT	regulation of myelination	2	2.9	0.071	26.8	1	0.27	0.23	0.0025
GOTERM_BP_DIRECT	organ growth	2	2.9	0.071	26.8	1	0.27	0.23	0.0025
GOTERM_BP_DIRECT	cellular protein metabolic process	2	2.9	0.071	26.8	1	0.27	0.23	0.0025
GOTERM_BP_DIRECT	cell migration involved in sprouting angiogenesis	2	2.9	0.071	26.8	1	0.27	0.23	0.0025
GOTERM_BP_DIRECT	phosphatidylinositol-3-phosphate biosynthetic process	2	2.9	0.071	26.8	1	0.27	0.23	0.0025
GOTERM_BP_DIRECT	cellular response to estrogen stimulus	2	2.9	0.071	26.8	1	0.27	0.23	0.0025
GOTERM_BP_DIRECT	regulation of tumor necrosis factor-mediated signaling pathway	2	2.9	0.071	26.8	1	0.27	0.23	0.0025
GOTERM_BP_DIRECT	positive regulation of gluconeogenesis	2	2.9	0.071	26.8	1	0.27	0.23	0.0025
GOTERM_BP_DIRECT	positive regulation of beta-amyloid formation	2	2.9	0.071	26.8	1	0.27	0.23	0.0025
GOTERM_BP_DIRECT	regulation of actin cytoskeleton reorganization	2	2.9	0.071	26.8	1	0.27	0.23	0.0025
GOTERM_BP_DIRECT	neuron projection development	3	4.3	0.072	6.7	1	0.27	0.23	0.01
GOTERM_BP_DIRECT	gene expression	3	4.3	0.074	6.6	1	0.28	0.24	0.011
GOTERM_BP_DIRECT	intracellular estrogen receptor signaling pathway	2	2.9	0.074	25.6	1	0.28	0.24	0.0027
GOTERM_BP_DIRECT	positive regulation of translational initiation	2	2.9	0.074	25.6	1	0.28	0.24	0.0027
GOTERM_BP_DIRECT	execution phase of apoptosis	2	2.9	0.074	25.6	1	0.28	0.24	0.0027
GOTERM_BP_DIRECT	positive regulation of insulin receptor signaling pathway	2	2.9	0.074	25.6	1	0.28	0.24	0.0027
GOTERM_BP_DIRECT	response to cadmium ion	2	2.9	0.074	25.6	1	0.28	0.24	0.0027
GOTERM_BP_DIRECT	branching morphogenesis of an epithelial tube	2	2.9	0.078	24.5	1	0.29	0.25	0.003
GOTERM_BP_DIRECT	nitric oxide biosynthetic process	2	2.9	0.078	24.5	1	0.29	0.25	0.003
GOTERM_BP_DIRECT	regulation of bone mineralization	2	2.9	0.078	24.5	1	0.29	0.25	0.003
GOTERM_BP_DIRECT	androgen receptor signaling pathway	2	2.9	0.078	24.5	1	0.29	0.25	0.003
GOTERM_BP_DIRECT	negative regulation of chondrocyte differentiation	2	2.9	0.078	24.5	1	0.29	0.25	0.003
GOTERM_BP_DIRECT	megakaryocyte development	2	2.9	0.078	24.5	1	0.29	0.25	0.003
GOTERM_BP_DIRECT	chromatin organization	4	5.8	0.078	4	1	0.29	0.25	0.018
GOTERM_BP_DIRECT	cellular response to nutrient levels	2	2.9	0.081	23.4	1	0.3	0.25	0.0033
GOTERM_BP_DIRECT	negative regulation of neurogenesis	2	2.9	0.081	23.4	1	0.3	0.25	0.0033
GOTERM_BP_DIRECT	positive regulation of protein metabolic process	2	2.9	0.081	23.4	1	0.3	0.25	0.0033
GOTERM_BP_DIRECT	negative regulation of interleukin-10 production	2	2.9	0.084	22.5	1	0.3	0.26	0.0035
GOTERM_BP_DIRECT	cell aging	2	2.9	0.084	22.5	1	0.3	0.26	0.0035
GOTERM_BP_DIRECT	cellular response to interleukin-4	2	2.9	0.084	22.5	1	0.3	0.26	0.0035
GOTERM_BP_DIRECT	negative regulation of pri-miRNA transcription from RNA polymerase II promoter	2	2.9	0.084	22.5	1	0.3	0.26	0.0035
GOTERM_BP_DIRECT	positive regulation of oligodendrocyte differentiation	2	2.9	0.087	21.6	1	0.31	0.27	0.0038
GOTERM_BP_DIRECT	bone resorption	2	2.9	0.087	21.6	1	0.31	0.27	0.0038
GOTERM_BP_DIRECT	regulation of multicellular organism growth	2	2.9	0.087	21.6	1	0.31	0.27	0.0038
GOTERM_BP_DIRECT	positive regulation of focal adhesion assembly	2	2.9	0.087	21.6	1	0.31	0.27	0.0038
GOTERM_BP_DIRECT	negative regulation of T cell receptor signaling pathway	2	2.9	0.09	20.8	1	0.32	0.28	0.0041
GOTERM_BP_DIRECT	aging	3	4.3	0.092	5.8	1	0.33	0.28	0.015
GOTERM_BP_DIRECT	negative regulation of cellular senescence	2	2.9	0.094	20.1	1	0.33	0.29	0.0044
GOTERM_BP_DIRECT	immune response	5	7.2	0.097	2.8	1	0.34	0.29	0.032
GOTERM_BP_DIRECT	positive regulation of activated T cell proliferation	2	2.9	0.097	19.4	1	0.34	0.29	0.0048
GOTERM_BP_DIRECT	microglial cell activation	2	2.9	0.097	19.4	1	0.34	0.29	0.0048
GOTERM_BP_DIRECT	negative regulation of blood pressure	2	2.9	0.097	19.4	1	0.34	0.29	0.0048
GOTERM_BP_DIRECT	positive regulation of microtubule polymerization	2	2.9	0.097	19.4	1	0.34	0.29	0.0048
GOTERM_BP_DIRECT	response to electrical stimulus	2	2.9	0.097	19.4	1	0.34	0.29	0.0048
GOTERM_BP_DIRECT	regulation of cell shape	3	4.3	0.097	5.6	1	0.34	0.29	0.016
GOTERM_BP_DIRECT	cellular response to gamma radiation	2	2.9	0.1	18.8	1	0.35	0.3	0.0051
GOTERM_BP_DIRECT	positive regulation of mitotic nuclear division	2	2.9	0.1	18.8	1	0.35	0.3	0.0051
GOTERM_BP_DIRECT	behavioral fear response	2	2.9	0.1	18.8	1	0.35	0.3	0.0051
GOTERM_BP_DIRECT	homeostasis of number of cells within a tissue	2	2.9	0.1	18.8	1	0.35	0.3	0.0051
GOTERM_BP_DIRECT	negative regulation of mitotic cell cycle	2	2.9	0.1	18.8	1	0.35	0.3	0.0051

## Sheet: AM_CC
Category	Term	Count	%	P-Value	Fold Enrichment	Bonferroni	Benjamini	FDR	Fisher Exact
GOTERM_CC_DIRECT	cytoplasm	54	78.3	6.8e-18	2.8	1.5e-15	1.5e-15	1.2e-15	2.4e-18
GOTERM_CC_DIRECT	cytosol	53	76.8	2.8e-17	2.8	6.3e-15	3.1e-15	2.5e-15	9.7e-18
GOTERM_CC_DIRECT	nucleus	54	78.3	1.1e-16	2.7	2.5e-14	8.4e-15	6.7e-15	4.1e-17
GOTERM_CC_DIRECT	nucleoplasm	43	62.3	2.6e-14	3.2	6e-12	1.5e-12	1.2e-12	8.2e-15
GOTERM_CC_DIRECT	extrinsic component of cytoplasmic side of plasma membrane	10	14.5	2.2e-12	40.9	5e-10	9.9e-11	7.9e-11	4.7e-14
GOTERM_CC_DIRECT	macromolecular complex	18	26.1	5.5e-11	7.9	1.3e-08	2.1e-09	1.7e-09	6.9e-12
GOTERM_CC_DIRECT	focal adhesion	14	20.3	1.2e-09	9.8	2.8e-07	4e-08	3.2e-08	1.2e-10
GOTERM_CC_DIRECT	perinuclear region of cytoplasm	17	24.6	1.5e-09	6.9	3.4e-07	4.3e-08	3.4e-08	2.1e-10
GOTERM_CC_DIRECT	mitochondrion	21	30.4	2.6e-08	4.3	6e-06	6.6e-07	5.3e-07	6e-09
GOTERM_CC_DIRECT	membrane raft	10	14.5	1.1e-07	12.2	2.5e-05	2.5e-06	2e-06	8.6e-09
GOTERM_CC_DIRECT	plasma membrane	39	56.5	1.4e-07	2.2	3.2e-05	2.9e-06	2.3e-06	6.3e-08
GOTERM_CC_DIRECT	glutamatergic synapse	11	15.9	9.2e-07	8	0.00021	1.7e-05	1.4e-05	1.1e-07
GOTERM_CC_DIRECT	ficolin-1-rich granule lumen	7	10.1	3.4e-06	16.9	0.00077	5.9e-05	4.7e-05	1.9e-07
GOTERM_CC_DIRECT	extrinsic component of plasma membrane	5	7.2	4.1e-06	45.3	0.00093	6.7e-05	5.3e-05	8e-08
GOTERM_CC_DIRECT	neuronal cell body	9	13	2.7e-05	7.3	0.0061	0.00041	0.00033	3.6e-06
GOTERM_CC_DIRECT	receptor complex	7	10.1	8.7e-05	9.5	0.02	0.0012	0.00099	8.8e-06
GOTERM_CC_DIRECT	caveola	5	7.2	0.00011	19.9	0.025	0.0015	0.0012	5.2e-06
GOTERM_CC_DIRECT	dendritic growth cone	3	4.3	0.00038	99.6	0.083	0.0048	0.0038	3e-06
GOTERM_CC_DIRECT	secretory granule lumen	5	7.2	0.00057	13	0.12	0.0065	0.0052	4.2e-05
GOTERM_CC_DIRECT	extracellular region	18	26.1	0.00057	2.5	0.12	0.0065	0.0052	0.00023
GOTERM_CC_DIRECT	chromatin	12	17.4	0.00062	3.4	0.13	0.0067	0.0053	0.00018
GOTERM_CC_DIRECT	membrane	24	34.8	0.001	2	0.21	0.011	0.0085	0.00051
GOTERM_CC_DIRECT	cell surface	9	13	0.0014	4.1	0.26	0.013	0.011	0.00032
GOTERM_CC_DIRECT	late endosome	5	7.2	0.0017	9.7	0.32	0.016	0.013	0.00017
GOTERM_CC_DIRECT	microtubule organizing center	5	7.2	0.0019	9.3	0.36	0.018	0.014	0.0002
GOTERM_CC_DIRECT	endosome lumen	3	4.3	0.0022	42.7	0.39	0.018	0.015	4.6e-05
GOTERM_CC_DIRECT	cytoskeleton	8	11.6	0.0022	4.4	0.39	0.018	0.015	0.00048
GOTERM_CC_DIRECT	cytoplasmic side of plasma membrane	4	5.8	0.0023	15.1	0.4	0.018	0.015	0.00014
GOTERM_CC_DIRECT	early endosome	6	8.7	0.0036	5.8	0.56	0.028	0.023	0.00061
GOTERM_CC_DIRECT	melanosome	4	5.8	0.0049	11.5	0.67	0.036	0.029	0.00041
GOTERM_CC_DIRECT	myelin sheath	3	4.3	0.005	28	0.68	0.036	0.029	0.00017
GOTERM_CC_DIRECT	intracellular membrane-bounded organelle	10	14.5	0.0055	3	0.71	0.039	0.031	0.0018
GOTERM_CC_DIRECT	postsynapse	4	5.8	0.0093	9.1	0.88	0.064	0.051	0.00098
GOTERM_CC_DIRECT	extracellular exosome	15	21.7	0.012	2	0.94	0.083	0.066	0.0059
GOTERM_CC_DIRECT	interleukin-12 receptor complex	2	2.9	0.013	149.4	0.95	0.083	0.066	6.6e-05
GOTERM_CC_DIRECT	postsynaptic specialization, intracellular component	2	2.9	0.013	149.4	0.95	0.083	0.066	6.6e-05
GOTERM_CC_DIRECT	interleukin-23 receptor complex	2	2.9	0.016	119.6	0.98	0.1	0.081	0.00011
GOTERM_CC_DIRECT	euchromatin	3	4.3	0.017	14.7	0.98	0.1	0.083	0.0011
GOTERM_CC_DIRECT	sorting endosome	2	2.9	0.02	99.6	0.99	0.11	0.091	0.00016
GOTERM_CC_DIRECT	basal plasma membrane	3	4.3	0.02	13.6	0.99	0.11	0.091	0.0014
GOTERM_CC_DIRECT	endosome	5	7.2	0.021	4.7	0.99	0.12	0.095	0.0044
GOTERM_CC_DIRECT	ribonucleoprotein complex	4	5.8	0.024	6.4	1	0.13	0.11	0.0036
GOTERM_CC_DIRECT	lamellipodium	4	5.8	0.026	6.2	1	0.13	0.11	0.0039
GOTERM_CC_DIRECT	plasma membrane region	2	2.9	0.026	74.7	1	0.13	0.11	0.0003
GOTERM_CC_DIRECT	mitochondrial crista	2	2.9	0.026	74.7	1	0.13	0.11	0.0003
GOTERM_CC_DIRECT	phosphatidylinositol 3-kinase complex, class IA	2	2.9	0.029	66.4	1	0.14	0.12	0.00039
GOTERM_CC_DIRECT	Golgi apparatus	9	13	0.034	2.3	1	0.16	0.13	0.014
GOTERM_CC_DIRECT	endoplasmic reticulum	9	13	0.036	2.3	1	0.17	0.14	0.015
GOTERM_CC_DIRECT	actin filament	3	4.3	0.041	9.2	1	0.19	0.15	0.0042
GOTERM_CC_DIRECT	transcription factor complex	4	5.8	0.041	5.2	1	0.19	0.15	0.0075
GOTERM_CC_DIRECT	lysosomal lumen	3	4.3	0.042	9.1	1	0.19	0.15	0.0043
GOTERM_CC_DIRECT	ruffle membrane	3	4.3	0.044	8.9	1	0.19	0.15	0.0047
GOTERM_CC_DIRECT	PML body	3	4.3	0.048	8.5	1	0.21	0.16	0.0054
GOTERM_CC_DIRECT	basolateral plasma membrane	4	5.8	0.05	4.8	1	0.21	0.17	0.01
GOTERM_CC_DIRECT	nuclear membrane	4	5.8	0.054	4.6	1	0.22	0.18	0.011
GOTERM_CC_DIRECT	nuclear speck	5	7.2	0.055	3.4	1	0.22	0.18	0.015
GOTERM_CC_DIRECT	pseudopodium	2	2.9	0.058	33.2	1	0.23	0.18	0.0016
GOTERM_CC_DIRECT	dendrite	5	7.2	0.06	3.3	1	0.24	0.19	0.017
GOTERM_CC_DIRECT	phosphatidylinositol 3-kinase complex	2	2.9	0.07	27.2	1	0.27	0.21	0.0024
GOTERM_CC_DIRECT	inclusion body	2	2.9	0.07	27.2	1	0.27	0.21	0.0024
GOTERM_CC_DIRECT	endoplasmic reticulum lumen	4	5.8	0.081	3.9	1	0.29	0.24	0.02
GOTERM_CC_DIRECT	mitotic spindle	3	4.3	0.081	6.3	1	0.29	0.24	0.012
GOTERM_CC_DIRECT	axonal growth cone	2	2.9	0.082	23	1	0.29	0.24	0.0034
GOTERM_CC_DIRECT	blood microparticle	3	4.3	0.083	6.2	1	0.29	0.24	0.013
GOTERM_CC_DIRECT	chaperone complex	2	2.9	0.094	19.9	1	0.33	0.26	0.0045

## Sheet: AM_MF 
Category	Term	Count	%	P-Value	Fold Enrichment	Bonferroni	Benjamini	FDR	Fisher Exact
GOTERM_MF_DIRECT	protein serine/threonine/tyrosine kinase activity	32	46.4	7.5e-33	20	2.4e-30	2.4e-30	1.7e-30	3.5e-34
GOTERM_MF_DIRECT	protein tyrosine kinase activity	20	29	2.9e-27	48.6	9.4e-25	4.7e-25	3.3e-25	5e-29
GOTERM_MF_DIRECT	ATP binding	39	56.5	4e-24	6.9	1.3e-21	4.3e-22	3.1e-22	5.6e-25
GOTERM_MF_DIRECT	enzyme binding	21	30.4	2.2e-18	15.2	7.1e-16	1.8e-16	1.3e-16	1.4e-19
GOTERM_MF_DIRECT	non-membrane spanning protein tyrosine kinase activity	12	17.4	5e-18	73.2	1.6e-15	3.2e-16	2.3e-16	5.2e-20
GOTERM_MF_DIRECT	protein kinase activity	19	27.5	8.2e-16	13.8	2.5e-13	4.4e-14	3.1e-14	5.7e-17
GOTERM_MF_DIRECT	protein serine/threonine kinase activity	16	23.2	8.5e-12	11	2.8e-09	3.9e-10	2.8e-10	7.4e-13
GOTERM_MF_DIRECT	protein kinase binding	16	23.2	3.8e-10	8.4	1.2e-07	1.5e-08	1.1e-08	4.4e-11
GOTERM_MF_DIRECT	kinase activity	12	17.4	5.3e-10	14.4	1.7e-07	1.9e-08	1.4e-08	3.5e-11
GOTERM_MF_DIRECT	protein binding	67	97.1	6.7e-10	1.5	2.2e-07	2.2e-08	1.5e-08	4.6e-10
GOTERM_MF_DIRECT	identical protein binding	25	36.2	2e-09	4	6.6e-07	6e-08	4.3e-08	5e-10
GOTERM_MF_DIRECT	phosphotyrosine binding	7	10.1	1.9e-08	40	6e-06	5e-07	3.6e-07	4.1e-10
GOTERM_MF_DIRECT	protein phosphatase binding	8	11.6	3.3e-08	24.4	1.1e-05	8.2e-07	5.8e-07	1.2e-09
GOTERM_MF_DIRECT	RNA polymerase II transcription factor activity, ligand-activated sequence-specific DNA binding	7	10.1	3.8e-08	35.6	1.2e-05	8.9e-07	6.3e-07	9.6e-10
GOTERM_MF_DIRECT	SH2 domain binding	6	8.7	3.5e-07	40.2	0.00011	7.5e-06	5.3e-06	7.6e-09
GOTERM_MF_DIRECT	MAP kinase kinase activity	5	7.2	4.5e-07	76.3	0.00014	9.1e-06	6.4e-06	4.6e-09
GOTERM_MF_DIRECT	transcription coactivator binding	6	8.7	6.3e-07	35.8	0.0002	1.2e-05	8.5e-06	1.6e-08
GOTERM_MF_DIRECT	transmembrane receptor protein tyrosine kinase activity	6	8.7	1.3e-06	31.1	0.00042	2.3e-05	1.6e-05	3.8e-08
GOTERM_MF_DIRECT	receptor binding	11	15.9	1.8e-06	7.4	0.00059	3.1e-05	2.2e-05	2.4e-07
GOTERM_MF_DIRECT	nitric-oxide synthase regulator activity	4	5.8	2.4e-06	137.3	0.00079	4e-05	2.8e-05	1.1e-08
GOTERM_MF_DIRECT	scaffold protein binding	6	8.7	4.2e-06	24.6	0.0014	6.4e-05	4.6e-05	1.6e-07
GOTERM_MF_DIRECT	growth hormone receptor binding	4	5.8	7.1e-06	99.8	0.0023	0.00011	7.5e-05	5.2e-08
GOTERM_MF_DIRECT	non-membrane spanning protein tyrosine phosphatase activity	4	5.8	9.5e-06	91.5	0.0031	0.00013	9.5e-05	7.8e-08
GOTERM_MF_DIRECT	insulin receptor substrate binding	4	5.8	1.2e-05	84.5	0.004	0.00017	0.00012	1.1e-07
GOTERM_MF_DIRECT	ubiquitin protein ligase binding	9	13	1.6e-05	7.9	0.005	0.0002	0.00014	1.9e-06
GOTERM_MF_DIRECT	integrin binding	7	10.1	2.2e-05	12.2	0.0071	0.00027	0.00019	1.7e-06
GOTERM_MF_DIRECT	MAP kinase activity	4	5.8	2.4e-05	68.6	0.0077	0.00029	0.0002	2.8e-07
GOTERM_MF_DIRECT	protein binding involved in protein folding	5	7.2	3.3e-05	26.9	0.011	0.00039	0.00027	1.1e-06
GOTERM_MF_DIRECT	zinc ion binding	13	18.8	5.7e-05	4.1	0.018	0.00064	0.00045	1.4e-05
GOTERM_MF_DIRECT	protein C-terminus binding	7	10.1	6.3e-05	10.1	0.02	0.00068	0.00048	6e-06
GOTERM_MF_DIRECT	heat shock protein binding	5	7.2	7.2e-05	22.1	0.023	0.00073	0.00052	3e-06
GOTERM_MF_DIRECT	steroid hormone receptor activity	4	5.8	7.4e-05	47.8	0.024	0.00073	0.00052	1.4e-06
GOTERM_MF_DIRECT	insulin receptor binding	4	5.8	7.4e-05	47.8	0.024	0.00073	0.00052	1.4e-06
GOTERM_MF_DIRECT	histone deacetylase binding	6	8.7	0.00011	12.6	0.034	0.001	0.00073	8.2e-06
GOTERM_MF_DIRECT	cadherin binding	8	11.6	0.00014	6.9	0.044	0.0013	0.00091	1.9e-05
GOTERM_MF_DIRECT	ephrin receptor binding	4	5.8	0.00018	35.4	0.058	0.0017	0.0012	4.7e-06
GOTERM_MF_DIRECT	sequence-specific DNA binding	8	11.6	0.00022	6.4	0.069	0.0019	0.0014	3.3e-05
GOTERM_MF_DIRECT	disordered domain specific binding	4	5.8	0.00031	29.7	0.097	0.0027	0.0019	9.7e-06
GOTERM_MF_DIRECT	enzyme inhibitor activity	4	5.8	0.00053	25	0.16	0.0044	0.0031	2e-05
GOTERM_MF_DIRECT	protein tyrosine phosphatase activity	5	7.2	0.00066	12.5	0.19	0.0053	0.0038	5e-05
GOTERM_MF_DIRECT	estrogen response element binding	3	4.3	0.00068	74.9	0.2	0.0054	0.0038	7.5e-06
GOTERM_MF_DIRECT	phosphatase binding	4	5.8	0.00077	22	0.22	0.0059	0.0042	3.3e-05
GOTERM_MF_DIRECT	unfolded protein binding	5	7.2	0.0012	10.6	0.33	0.0093	0.0066	0.00011
GOTERM_MF_DIRECT	transcription regulatory region sequence-specific DNA binding	6	8.7	0.0015	7	0.39	0.011	0.008	0.00021
GOTERM_MF_DIRECT	ion channel binding	5	7.2	0.0016	9.8	0.41	0.012	0.0082	0.00016
GOTERM_MF_DIRECT	protein domain specific binding	6	8.7	0.0019	6.7	0.47	0.014	0.0097	0.00028
GOTERM_MF_DIRECT	phosphatidylinositol 3-kinase binding	3	4.3	0.0021	43.4	0.49	0.014	0.01	4.3e-05
GOTERM_MF_DIRECT	endopeptidase activity	4	5.8	0.0027	14.3	0.58	0.018	0.013	0.00018
GOTERM_MF_DIRECT	phospholipase binding	3	4.3	0.0031	35.8	0.63	0.02	0.014	7.8e-05
GOTERM_MF_DIRECT	transcription factor activity, sequence-specific DNA binding	8	11.6	0.004	3.9	0.73	0.026	0.018	0.00098
GOTERM_MF_DIRECT	MHC class II protein complex binding	3	4.3	0.0045	29.4	0.77	0.029	0.02	0.00014
GOTERM_MF_DIRECT	protein homodimerization activity	9	13	0.0047	3.4	0.78	0.029	0.021	0.0014
GOTERM_MF_DIRECT	misfolded protein binding	3	4.3	0.0048	28.4	0.79	0.03	0.021	0.00016
GOTERM_MF_DIRECT	steroid binding	3	4.3	0.0052	27.5	0.81	0.031	0.022	0.00017
GOTERM_MF_DIRECT	protein phosphatase 2A binding	3	4.3	0.0055	26.6	0.83	0.033	0.023	0.00019
GOTERM_MF_DIRECT	transcription corepressor activity	5	7.2	0.0058	6.9	0.85	0.034	0.024	0.00081
GOTERM_MF_DIRECT	protein N-terminus binding	4	5.8	0.0067	10.3	0.89	0.037	0.026	0.00063
GOTERM_MF_DIRECT	cyclin binding	3	4.3	0.007	23.5	0.9	0.037	0.026	0.00028
GOTERM_MF_DIRECT	chaperone binding	4	5.8	0.0071	10.1	0.9	0.037	0.026	0.00067
GOTERM_MF_DIRECT	dATP binding	2	2.9	0.0072	274.6	0.9	0.037	0.026	1.3e-05
GOTERM_MF_DIRECT	CTP binding	2	2.9	0.0072	274.6	0.9	0.037	0.026	1.3e-05
GOTERM_MF_DIRECT	cyclin-dependent protein kinase activity	2	2.9	0.0072	274.6	0.9	0.037	0.026	1.3e-05
GOTERM_MF_DIRECT	transcriptional activator activity, RNA polymerase II transcription regulatory region sequence-specific binding	7	10.1	0.0072	4	0.91	0.037	0.026	0.0017
GOTERM_MF_DIRECT	protease binding	4	5.8	0.0074	9.9	0.91	0.038	0.027	0.00072
GOTERM_MF_DIRECT	growth factor binding	3	4.3	0.0078	22.3	0.92	0.039	0.028	0.00033
GOTERM_MF_DIRECT	phosphoprotein binding	3	4.3	0.0082	21.7	0.93	0.04	0.029	0.00036
GOTERM_MF_DIRECT	protein kinase activator activity	3	4.3	0.01	19.6	0.96	0.048	0.034	0.00048
GOTERM_MF_DIRECT	UTP binding	2	2.9	0.011	183	0.97	0.05	0.036	3.9e-05
GOTERM_MF_DIRECT	sulfonylurea receptor binding	2	2.9	0.011	183	0.97	0.05	0.036	3.9e-05
GOTERM_MF_DIRECT	Hsp90 protein binding	3	4.3	0.011	18.7	0.97	0.05	0.036	0.00055
GOTERM_MF_DIRECT	transcription corepressor binding	3	4.3	0.012	17.5	0.98	0.056	0.04	0.00067
GOTERM_MF_DIRECT	death receptor agonist activity	2	2.9	0.014	137.3	0.99	0.064	0.046	7.8e-05
GOTERM_MF_DIRECT	sequence-specific double-stranded DNA binding	7	10.1	0.015	3.4	0.99	0.067	0.047	0.0042
GOTERM_MF_DIRECT	vascular endothelial growth factor binding	2	2.9	0.018	109.8	1	0.075	0.053	0.00013
GOTERM_MF_DIRECT	histone kinase activity	2	2.9	0.018	109.8	1	0.075	0.053	0.00013
GOTERM_MF_DIRECT	glycosphingolipid binding	2	2.9	0.018	109.8	1	0.075	0.053	0.00013
GOTERM_MF_DIRECT	phosphatidylinositol 3-kinase activity	2	2.9	0.018	109.8	1	0.075	0.053	0.00013
GOTERM_MF_DIRECT	NFAT protein binding	2	2.9	0.021	91.5	1	0.084	0.06	0.00019
GOTERM_MF_DIRECT	TPR domain binding	2	2.9	0.021	91.5	1	0.084	0.06	0.00019
GOTERM_MF_DIRECT	retinoic acid-responsive element binding	2	2.9	0.021	91.5	1	0.084	0.06	0.00019
GOTERM_MF_DIRECT	type 1 angiotensin receptor binding	2	2.9	0.021	91.5	1	0.084	0.06	0.00019
GOTERM_MF_DIRECT	C3HC4-type RING finger domain binding	2	2.9	0.021	91.5	1	0.084	0.06	0.00019
GOTERM_MF_DIRECT	receptor tyrosine kinase binding	3	4.3	0.022	12.9	1	0.087	0.061	0.0016
GOTERM_MF_DIRECT	peptide binding	3	4.3	0.025	12.1	1	0.094	0.066	0.002
GOTERM_MF_DIRECT	phosphatidylinositol-4,5-bisphosphate 3-kinase activity	2	2.9	0.025	78.4	1	0.094	0.066	0.00027
GOTERM_MF_DIRECT	1-phosphatidylinositol-4-phosphate 3-kinase activity	2	2.9	0.025	78.4	1	0.094	0.066	0.00027
GOTERM_MF_DIRECT	chromatin binding	6	8.7	0.027	3.5	1	0.099	0.07	0.0072
GOTERM_MF_DIRECT	G-protein coupled receptor binding	3	4.3	0.027	11.6	1	0.099	0.07	0.0022
GOTERM_MF_DIRECT	RNA polymerase II sequence-specific DNA binding transcription factor binding	4	5.8	0.028	6	1	0.1	0.072	0.0044
GOTERM_MF_DIRECT	protein self-association	3	4.3	0.029	11.1	1	0.1	0.073	0.0025
GOTERM_MF_DIRECT	RNA polymerase II core promoter proximal region sequence-specific DNA binding	10	14.5	0.029	2.3	1	0.1	0.073	0.012
GOTERM_MF_DIRECT	DNA binding	11	15.9	0.03	2.1	1	0.1	0.073	0.013
GOTERM_MF_DIRECT	binding, bridging	4	5.8	0.03	5.9	1	0.1	0.073	0.0048
GOTERM_MF_DIRECT	serine-type endopeptidase activity	4	5.8	0.03	5.8	1	0.1	0.074	0.0049
GOTERM_MF_DIRECT	peptide hormone receptor binding	2	2.9	0.032	61	1	0.11	0.076	0.00046
GOTERM_MF_DIRECT	phosphatidylinositol-3,4-bisphosphate 5-kinase activity	2	2.9	0.032	61	1	0.11	0.076	0.00046
GOTERM_MF_DIRECT	1-phosphatidylinositol-3-kinase activity	2	2.9	0.035	54.9	1	0.12	0.084	0.00058
GOTERM_MF_DIRECT	chromatin DNA binding	3	4.3	0.036	9.9	1	0.12	0.084	0.0035
GOTERM_MF_DIRECT	ATPase binding	3	4.3	0.038	9.6	1	0.12	0.088	0.0038
GOTERM_MF_DIRECT	phospholipase activator activity	2	2.9	0.039	49.9	1	0.12	0.088	0.0007
GOTERM_MF_DIRECT	protein serine/threonine kinase inhibitor activity	2	2.9	0.039	49.9	1	0.12	0.088	0.0007
GOTERM_MF_DIRECT	phosphatidylinositol kinase activity	2	2.9	0.042	45.8	1	0.13	0.093	0.00084
GOTERM_MF_DIRECT	STAT family protein binding	2	2.9	0.042	45.8	1	0.13	0.093	0.00084
GOTERM_MF_DIRECT	NAD-dependent histone deacetylase activity (H3-K14 specific)	2	2.9	0.042	45.8	1	0.13	0.093	0.00084
GOTERM_MF_DIRECT	protein deacetylase activity	2	2.9	0.042	45.8	1	0.13	0.093	0.00084
GOTERM_MF_DIRECT	RNA polymerase II carboxy-terminal domain kinase activity	2	2.9	0.046	42.2	1	0.14	0.099	0.00099
GOTERM_MF_DIRECT	platelet-derived growth factor receptor binding	2	2.9	0.049	39.2	1	0.15	0.11	0.0012
GOTERM_MF_DIRECT	kinase binding	3	4.3	0.053	8	1	0.16	0.11	0.0063
GOTERM_MF_DIRECT	peptidase activity	3	4.3	0.055	7.8	1	0.16	0.12	0.0066
GOTERM_MF_DIRECT	metalloendopeptidase activity	3	4.3	0.061	7.4	1	0.18	0.13	0.0079
GOTERM_MF_DIRECT	core promoter sequence-specific DNA binding	2	2.9	0.063	30.5	1	0.18	0.13	0.0019
GOTERM_MF_DIRECT	ATPase activity	5	7.2	0.064	3.3	1	0.18	0.13	0.018
GOTERM_MF_DIRECT	histone deacetylase activity	2	2.9	0.069	27.5	1	0.2	0.14	0.0024
GOTERM_MF_DIRECT	SH3 domain binding	3	4.3	0.075	6.5	1	0.21	0.15	0.011
GOTERM_MF_DIRECT	DNA polymerase binding	2	2.9	0.076	25	1	0.21	0.15	0.0029
GOTERM_MF_DIRECT	RNA polymerase II transcription factor activity, sequence-specific DNA binding	9	13	0.088	1.9	1	0.25	0.17	0.042

## Sheet: GO NUMBERS
	ID	Gene symbol	Numbers related KEGG	Numbers related BP	Numbers related MF
on	1	IGF1R	27/164	152/2481	13/224
on	2	ERBB2	20/164	104/2481	10/224
on	3	PLG	1/164	45/2481	5/224
on	4	JAK2	22/164	339/2481	16/224
on	5	MAP2K3	20/164	44/2481	5/224
on	6	NR3C1	0/164	62/2481	13/224
on	7	AKT1	97/164	411/2481	9/224
on	8	RXRB	12/164	19/2481	6/224
on	9	PRKCB	62/164	68/2481	14/224
on	10	PTK2	23/164	137/2481	11/224
on	11	TNF	57/164	649/2481	6/224
on	12	LYN	12/164	283/2481	17/224
on	13	HDAC3	4/164	47/2481	13/224
on	14	PAK1	18/164	97/2481	5/224
on	15	CREBBP	22/164	55/2481	8/224
on	16	HSP90AB1	14/164	137/2481	28/224
on	17	GAPDH	5/164	52/2481	2/224
on	18	CASP8	35/164	75/2481	12/224
on	19	HSF1	1/164	150/2481	13/224
on	20	EGFR	47/164	190/2481	23/224
on	21	IL6	44/164	363/2481	5/224
on	22	PTK2B	10/164	286/2481	7/224
on	23	MAPK3	115/164	173/2481	9/224
on	24	HSP90AA1	14/164	142/2481	28/224
on	25	CDK2	18/164	49/2481	6/224
on	26	PIK3CA	102/164	162/2481	15/224
on	27	AR	3/164	104/2481	15/224
on	28	PTPN6	9/164	174/2481	11/224
on	29	PPARA	9/164	213/2481	13/224
on	30	MAPK8	68/164	99/2481	9/224
on	31	ABL1	10/164	400/2481	14/224
on	32	FGF2	14/164	271/2481	8/224
on	33	RXRA	15/164	47/2481	19/224
on	34	IL2	13/164	186/2481	12/224
on	35	MAPK1	115/164	170/2481	10/224
on	36	MMP1	7/164	20/2481	5/224
on	37	MAP2K1	87/164	98/2481	13/224
on	38	RPS6KB1	29/164	120/2481	8/224
on	39	RARA	4/164	193/2481	16/224
on	40	NOS2	14/164	92/2481	6/224
on	41	PIK3CB	102/164	110/2481	10/224
on	42	MDM2	23/164	92/2481	6/224
on	43	JAK3	13/164	148/2481	7/224
on	44	IKBKB	57/164	77/2481	5/224
on	45	CASP3	42/164	156/2481	12/224
on	46	TLR4	30/164	277/2481	4/224
on	47	PDGFRB	18/164	171/2481	10/224
on	48	HDAC1	14/164	113/2481	17/224
on	49	PTPN1	4/164	96/2481	13/224
on	50	PRKCA	63/164	109/2481	9/224
on	51	PTPN2	1/164	197/2481	11/224
on	52	MMP9	15/164	105/2481	5/224
on	53	SYK	16/164	283/2481	12/224
on	54	VEGFA	23/164	321/2481	9/224
on	55	MAPK14	61/164	178/2481	11/224
on	56	NFKB1	73/164	111/2481	5/224
on	57	MET	22/164	107/2481	6/224
on	58	RARB	3/164	64/2481	2/224
on	59	SRC	38/164	401/2481	23/224
on	60	S1PR1	2/164	70/2481	2/224
on	61	BTK	6/164	174/2481	6/224
on	62	HSPA1A	11/164	169/2481	21/224
on	63	MTOR	47/164	290/2481	9/224
on	64	PPARG	9/164	257/2481	23/224
on	65	MMP2	10/164	113/2481	6/224
on	66	HSPA5	7/164	102/2481	10/224
on	67	YES1	1/164	52/2481	6/224
on	68	JAK1	25/164	44/2481	10/224
on	69	NR0B2	0/164	42/2481	8/224
on	70	BCL2	40/164	355/2481	11/224
on	71	PTPN11	18/164	188/2481	15/224
on	72	TERT	4/164	130/2481	6/224
on	73	ESR1	8/164	110/2481	20/224
on	74	RARG	0/164	89/2481	7/224
on	75	TYK2	15/164	80/2481	8/224
on	76	KDR	10/164	174/2481	9/224
on	77	ERBB4	6/164	88/2481	11/224
on	78	CDK1	8/164	123/2481	10/224
on	79	HSPA8	11/164	47/2481	17/224

## Sheet: GO
	MOLECULAR FUNCTION					BIOLOGICAL PROCESS
GO:0004707	MAP kinase activity	(GO:0004707)				GO:0043410	positive regulation of MAPK cascade	GO:0043410
GO:0004674	protein serine/threonine kinase activity	GO:0004674				GO:0009410	RESPONSE TO XENOBIOTIC STIMULUS	GO:0009410
GO:0019103	pyrimidine nucleotide binding	GO:0019103				GO:0018108	PEPTIDYL-TYROSINE PHOSPHORYLATION	GO:0018108
GO:0030235	nitric-oxide synthase regulator activity	GO:0030235				GO:0018105	PEPTIDYL SERINE PHOSPHORYLATION	GO:0018105
GO:0043274	phospholipase binding Gene	GO:0043274
GO:0051117	ATPase binding	GO:0051117
GO:0070851	growth factor receptor binding	GO:0070851
GO:0005126	cytokine receptor binding	GO:0005126
GO:0002020	protease binding	GO:0002020
	CELLULAR COMPONENTS
GO:0009898	cytoplasmic side of plasma membrane	GO:0009898
GO:0098978	glutamatergic synapse	GO:0098978
GO:0045121	membrane raft	GO:0045121
GO:0043025	neuronal cell body	GO:0043025
GO:0005788	endoplasmic reticulum lumen	GO:0005788
GO:0044294	dendritic growth cone	GO:0044294
GO:0031983	vesicle lumen	GO:0031983
GO:0045178	basal part of cell	GO:0045178
GO:0016324	apical plasma membrane	GO:0016324
