# Supplementary material for: Exploring the bioactives and the mechanism of Aegle marmelos in the treatment of Inflammatory bowel disease through network pharmacology and molecular docking approach
Source: Research Square preprint supplement (doi:10.21203/rs.3.rs-3421028/v1), 2023-10-13
Supplement: Supplementary file 2 [file 61cbff51f1dcd6c0de4cdead.xlsx]

## Sheet: Details of worksheets
Target fishing of IBD(Inflammatory bowel disease) using DisGeNet and GeneCards
Worksheet Name	Details
UC_genecards	Targets of Ulcerative colitis fetched from GeneCards database
CD_genecards	Targets of Crohn's Disease fetched from GeneCards database
UC_DisGeNet	Targets of Ulcerative colitis fetched from DisGenet database
CD_DisGeNet	Targets of Crohn's Disease fetched from DisGenet database
IBD_genecards	Targets of Inflammatory bowel disease fetched from GeneCards database
IBD_DisGeNet	Targets of Inflammatory bowel disease fetched from DisGenet database

## Sheet: UC_genecards
Disease	GENE	Description	Category	Gifts	GC Id	Relevance score	GeneCards Link
Ulcerative colitis	NOD2	Nucleotide Binding Oligomerization Domain Containing 2	Protein Coding	55	GC16P050693	64.1864	https://www.genecards.org/cgi-bin/carddisp.pl?gene=NOD2
Ulcerative colitis	IL6	Interleukin 6	Protein Coding	58	GC07P022725	47.9796	https://www.genecards.org/cgi-bin/carddisp.pl?gene=IL6
Ulcerative colitis	IL10	Interleukin 10	Protein Coding	55	GC01M206767	47.217	https://www.genecards.org/cgi-bin/carddisp.pl?gene=IL10
Ulcerative colitis	TNF	Tumor Necrosis Factor	Protein Coding	59	GC06P092154	42.5483	https://www.genecards.org/cgi-bin/carddisp.pl?gene=TNF
Ulcerative colitis	IL23R	Interleukin 23 Receptor	Protein Coding	52	GC01P067138	38.9857	https://www.genecards.org/cgi-bin/carddisp.pl?gene=IL23R
Ulcerative colitis	IL1B	Interleukin 1 Beta	Protein Coding	54	GC02M112829	36.5032	https://www.genecards.org/cgi-bin/carddisp.pl?gene=IL1B
Ulcerative colitis	TLR4	Toll Like Receptor 4	Protein Coding	58	GC09P117704	34.2858	https://www.genecards.org/cgi-bin/carddisp.pl?gene=TLR4
Ulcerative colitis	HLA-DRB1	Major Histocompatibility Complex, Class II, DR Beta 1	Protein Coding	53	GC06M071772	33.0404	https://www.genecards.org/cgi-bin/carddisp.pl?gene=HLA-DRB1
Ulcerative colitis	ABCB1	ATP Binding Cassette Subfamily B Member 1	Protein Coding	57	GC07M087504	29.4449	https://www.genecards.org/cgi-bin/carddisp.pl?gene=ABCB1
Ulcerative colitis	CXCL8	C-X-C Motif Chemokine Ligand 8	Protein Coding	50	GC04P073740	29.2132	https://www.genecards.org/cgi-bin/carddisp.pl?gene=CXCL8
Ulcerative colitis	TGFB1	Transforming Growth Factor Beta 1	Protein Coding	60	GC19M041301	29.1369	https://www.genecards.org/cgi-bin/carddisp.pl?gene=TGFB1
Ulcerative colitis	INAVA	Innate Immunity Activator	Protein Coding	40	GC01P200892	28.8808	https://www.genecards.org/cgi-bin/carddisp.pl?gene=INAVA
Ulcerative colitis	MPO	Myeloperoxidase	Protein Coding	59	GC17M058269	28.2594	https://www.genecards.org/cgi-bin/carddisp.pl?gene=MPO
Ulcerative colitis	TLR2	Toll Like Receptor 2	Protein Coding	59	GC04P153684	28.0615	https://www.genecards.org/cgi-bin/carddisp.pl?gene=TLR2
Ulcerative colitis	IL10RA	Interleukin 10 Receptor Subunit Alpha	Protein Coding	53	GC11P117987	27.9898	https://www.genecards.org/cgi-bin/carddisp.pl?gene=IL10RA
Ulcerative colitis	IL1RN	Interleukin 1 Receptor Antagonist	Protein Coding	57	GC02P123802	27.5909	https://www.genecards.org/cgi-bin/carddisp.pl?gene=IL1RN
Ulcerative colitis	HLA-B	Major Histocompatibility Complex, Class I, B	Protein Coding	52	GC06M071682	27.0214	https://www.genecards.org/cgi-bin/carddisp.pl?gene=HLA-B
Ulcerative colitis	IFNG	Interferon Gamma	Protein Coding	57	GC12M068154	26.4098	https://www.genecards.org/cgi-bin/carddisp.pl?gene=IFNG
Ulcerative colitis	CRP	C-Reactive Protein	Protein Coding	53	GC01M159729	25.7483	https://www.genecards.org/cgi-bin/carddisp.pl?gene=CRP
Ulcerative colitis	SYK	Spleen Associated Tyrosine Kinase	Protein Coding	56	GC09P092704	25.5131	https://www.genecards.org/cgi-bin/carddisp.pl?gene=SYK
Ulcerative colitis	IL2	Interleukin 2	Protein Coding	53	GC04M122451	25.4976	https://www.genecards.org/cgi-bin/carddisp.pl?gene=IL2
Ulcerative colitis	ATG16L1	Autophagy Related 16 Like 1	Protein Coding	48	GC02P233260	25.4138	https://www.genecards.org/cgi-bin/carddisp.pl?gene=ATG16L1
Ulcerative colitis	IL37	Interleukin 37	Protein Coding	46	GC02P123799	25.2815	https://www.genecards.org/cgi-bin/carddisp.pl?gene=IL37
Ulcerative colitis	CTLA4	Cytotoxic T-Lymphocyte Associated Protein 4	Protein Coding	54	GC02P203854	24.9712	https://www.genecards.org/cgi-bin/carddisp.pl?gene=CTLA4
Ulcerative colitis	PRKCQ	Protein Kinase C Theta	Protein Coding	55	GC10M006591	24.8076	https://www.genecards.org/cgi-bin/carddisp.pl?gene=PRKCQ
Ulcerative colitis	IRF5	Interferon Regulatory Factor 5	Protein Coding	53	GC07P128937	24.3521	https://www.genecards.org/cgi-bin/carddisp.pl?gene=IRF5
Ulcerative colitis	FOXP3	Forkhead Box P3	Protein Coding	53	GC0XM049250	23.9597	https://www.genecards.org/cgi-bin/carddisp.pl?gene=FOXP3
Ulcerative colitis	RELA	RELA Proto-Oncogene, NF-KB Subunit	Protein Coding	59	GC11M065653	23.8173	https://www.genecards.org/cgi-bin/carddisp.pl?gene=RELA
Ulcerative colitis	NFKB1	Nuclear Factor Kappa B Subunit 1	Protein Coding	60	GC04P102501	23.7118	https://www.genecards.org/cgi-bin/carddisp.pl?gene=NFKB1
Ulcerative colitis	IL17A	Interleukin 17A	Protein Coding	50	GC06P052186	23.2084	https://www.genecards.org/cgi-bin/carddisp.pl?gene=IL17A
Ulcerative colitis	PLA2G4A	Phospholipase A2 Group IVA	Protein Coding	55	GC01P186798	23.1546	https://www.genecards.org/cgi-bin/carddisp.pl?gene=PLA2G4A
Ulcerative colitis	IRGM	Immunity Related GTPase M	Protein Coding	42	GC05P150846	22.9456	https://www.genecards.org/cgi-bin/carddisp.pl?gene=IRGM
Ulcerative colitis	CCR6	C-C Motif Chemokine Receptor 6	Protein Coding	51	GC06P167111	22.7146	https://www.genecards.org/cgi-bin/carddisp.pl?gene=CCR6
Ulcerative colitis	MLH1	MutL Homolog 1	Protein Coding	55	GC03P036993	22.5261	https://www.genecards.org/cgi-bin/carddisp.pl?gene=MLH1
Ulcerative colitis	IL4	Interleukin 4	Protein Coding	53	GC05P132673	22.497	https://www.genecards.org/cgi-bin/carddisp.pl?gene=IL4
Ulcerative colitis	FAS	Fas Cell Surface Death Receptor	Protein Coding	57	GC10P094616	22.2829	https://www.genecards.org/cgi-bin/carddisp.pl?gene=FAS
Ulcerative colitis	TP53	Tumor Protein P53	Protein Coding	60	GC17M007661	21.7287	https://www.genecards.org/cgi-bin/carddisp.pl?gene=TP53
Ulcerative colitis	CTNNB1	Catenin Beta 1	Protein Coding	60	GC03P041194	21.3194	https://www.genecards.org/cgi-bin/carddisp.pl?gene=CTNNB1
Ulcerative colitis	IL10RB	Interleukin 10 Receptor Subunit Beta	Protein Coding	51	GC21P033266	21.1156	https://www.genecards.org/cgi-bin/carddisp.pl?gene=IL10RB
Ulcerative colitis	MEFV	MEFV Innate Immunity Regulator, Pyrin	Protein Coding	51	GC16M008228	19.8298	https://www.genecards.org/cgi-bin/carddisp.pl?gene=MEFV
Ulcerative colitis	AKT1	AKT Serine/Threonine Kinase 1	Protein Coding	61	GC14M104769	19.7517	https://www.genecards.org/cgi-bin/carddisp.pl?gene=AKT1
Ulcerative colitis	MST1	Macrophage Stimulating 1	Protein Coding	53	GC03M049683	19.6679	https://www.genecards.org/cgi-bin/carddisp.pl?gene=MST1
Ulcerative colitis	ELANE	Elastase, Neutrophil Expressed	Protein Coding	58	GC19P003656	19.5773	https://www.genecards.org/cgi-bin/carddisp.pl?gene=ELANE
Ulcerative colitis	BTNL2	Butyrophilin Like 2	Protein Coding	45	GC06M032393	19.4282	https://www.genecards.org/cgi-bin/carddisp.pl?gene=BTNL2
Ulcerative colitis	TNFAIP3	TNF Alpha Induced Protein 3	Protein Coding	55	GC06P137866	19.3619	https://www.genecards.org/cgi-bin/carddisp.pl?gene=TNFAIP3
Ulcerative colitis	PTGS2	Prostaglandin-Endoperoxide Synthase 2	Protein Coding	56	GC01M186671	19.0209	https://www.genecards.org/cgi-bin/carddisp.pl?gene=PTGS2
Ulcerative colitis	IL13	Interleukin 13	Protein Coding	50	GC05P132656	18.9572	https://www.genecards.org/cgi-bin/carddisp.pl?gene=IL13
Ulcerative colitis	STAT3	Signal Transducer And Activator Of Transcription 3	Protein Coding	61	GC17M042313	18.9447	https://www.genecards.org/cgi-bin/carddisp.pl?gene=STAT3
Ulcerative colitis	PRTN3	Proteinase 3	Protein Coding	52	GC19P000840	18.8452	https://www.genecards.org/cgi-bin/carddisp.pl?gene=PRTN3
Ulcerative colitis	SLC11A1	Solute Carrier Family 11 Member 1	Protein Coding	53	GC02P218382	18.823	https://www.genecards.org/cgi-bin/carddisp.pl?gene=SLC11A1
Ulcerative colitis	TNFSF15	TNF Superfamily Member 15	Protein Coding	51	GC09M114784	18.6249	https://www.genecards.org/cgi-bin/carddisp.pl?gene=TNFSF15
Ulcerative colitis	SMAD4	SMAD Family Member 4	Protein Coding	59	GC18P051028	18.5291	https://www.genecards.org/cgi-bin/carddisp.pl?gene=SMAD4
Ulcerative colitis	CD4	CD4 Molecule	Protein Coding	57	GC12P006786	18.4605	https://www.genecards.org/cgi-bin/carddisp.pl?gene=CD4
Ulcerative colitis	SMAD7	SMAD Family Member 7	Protein Coding	51	GC18M048919	18.3435	https://www.genecards.org/cgi-bin/carddisp.pl?gene=SMAD7
Ulcerative colitis	GAST	Gastrin	Protein Coding	46	GC17P041712	18.2406	https://www.genecards.org/cgi-bin/carddisp.pl?gene=GAST
Ulcerative colitis	MUC2	Mucin 2, Oligomeric Mucus/Gel-Forming	Protein Coding	44	GC11P001074	18.1456	https://www.genecards.org/cgi-bin/carddisp.pl?gene=MUC2
Ulcerative colitis	PPARG	Peroxisome Proliferator Activated Receptor Gamma	Protein Coding	60	GC03P012287	17.8705	https://www.genecards.org/cgi-bin/carddisp.pl?gene=PPARG
Ulcerative colitis	IL22	Interleukin 22	Protein Coding	49	GC12M068248	17.7771	https://www.genecards.org/cgi-bin/carddisp.pl?gene=IL22
Ulcerative colitis	STAT4	Signal Transducer And Activator Of Transcription 4	Protein Coding	53	GC02M191029	17.6843	https://www.genecards.org/cgi-bin/carddisp.pl?gene=STAT4
Ulcerative colitis	IL5	Interleukin 5	Protein Coding	52	GC05M132541	17.6687	https://www.genecards.org/cgi-bin/carddisp.pl?gene=IL5
Ulcerative colitis	LTF	Lactotransferrin	Protein Coding	52	GC03M046435	17.6414	https://www.genecards.org/cgi-bin/carddisp.pl?gene=LTF
Ulcerative colitis	MSH2	MutS Homolog 2	Protein Coding	56	GC02P047403	17.6401	https://www.genecards.org/cgi-bin/carddisp.pl?gene=MSH2
Ulcerative colitis	IL1R1	Interleukin 1 Receptor Type 1	Protein Coding	53	GC02P102136	17.4958	https://www.genecards.org/cgi-bin/carddisp.pl?gene=IL1R1
Ulcerative colitis	NOS2	Nitric Oxide Synthase 2	Protein Coding	56	GC17M027756	17.1533	https://www.genecards.org/cgi-bin/carddisp.pl?gene=NOS2
Ulcerative colitis	ALB	Albumin	Protein Coding	56	GC04P073397	17.0335	https://www.genecards.org/cgi-bin/carddisp.pl?gene=ALB
Ulcerative colitis	TNFRSF1A	TNF Receptor Superfamily Member 1A	Protein Coding	57	GC12M006328	16.9661	https://www.genecards.org/cgi-bin/carddisp.pl?gene=TNFRSF1A
Ulcerative colitis	MIR21	MicroRNA 21	RNA Gene	26	GC17P063092	16.8524	https://www.genecards.org/cgi-bin/carddisp.pl?gene=MIR21
Ulcerative colitis	MSH6	MutS Homolog 6	Protein Coding	55	GC02P047695	16.8425	https://www.genecards.org/cgi-bin/carddisp.pl?gene=MSH6
Ulcerative colitis	NLRP3	NLR Family Pyrin Domain Containing 3	Protein Coding	55	GC01P247415	16.766	https://www.genecards.org/cgi-bin/carddisp.pl?gene=NLRP3
Ulcerative colitis	PSTPIP1	Proline-Serine-Threonine Phosphatase Interacting Protein 1	Protein Coding	50	GC15P076993	16.6368	https://www.genecards.org/cgi-bin/carddisp.pl?gene=PSTPIP1
Ulcerative colitis	FASLG	Fas Ligand	Protein Coding	55	GC01P172628	16.6187	https://www.genecards.org/cgi-bin/carddisp.pl?gene=FASLG
Ulcerative colitis	CHEK2	Checkpoint Kinase 2	Protein Coding	61	GC22M028687	16.4164	https://www.genecards.org/cgi-bin/carddisp.pl?gene=CHEK2
Ulcerative colitis	VEGFA	Vascular Endothelial Growth Factor A	Protein Coding	56	GC06P043770	16.4029	https://www.genecards.org/cgi-bin/carddisp.pl?gene=VEGFA
Ulcerative colitis	MYO9B	Myosin IXB	Protein Coding	50	GC19P072400	16.3717	https://www.genecards.org/cgi-bin/carddisp.pl?gene=MYO9B
Ulcerative colitis	MMP1	Matrix Metallopeptidase 1	Protein Coding	57	GC11M102810	16.0541	https://www.genecards.org/cgi-bin/carddisp.pl?gene=MMP1
Ulcerative colitis	STAT6	Signal Transducer And Activator Of Transcription 6	Protein Coding	57	GC12M057095	16.0043	https://www.genecards.org/cgi-bin/carddisp.pl?gene=STAT6
Ulcerative colitis	REL	REL Proto-Oncogene, NF-KB Subunit	Protein Coding	53	GC02P060881	15.9459	https://www.genecards.org/cgi-bin/carddisp.pl?gene=REL
Ulcerative colitis	CCR3	C-C Motif Chemokine Receptor 3	Protein Coding	52	GC03P047610	15.8892	https://www.genecards.org/cgi-bin/carddisp.pl?gene=CCR3
Ulcerative colitis	REG4	Regenerating Family Member 4	Protein Coding	47	GC01M119794	15.8859	https://www.genecards.org/cgi-bin/carddisp.pl?gene=REG4
Ulcerative colitis	GPR35	G Protein-Coupled Receptor 35	Protein Coding	50	GC02P240605	15.8513	https://www.genecards.org/cgi-bin/carddisp.pl?gene=GPR35
Ulcerative colitis	ST6GALNAC1	ST6 N-Acetylgalactosaminide Alpha-2,6-Sialyltransferase 1	Protein Coding	46	GC17M076624	15.8505	https://www.genecards.org/cgi-bin/carddisp.pl?gene=ST6GALNAC1
Ulcerative colitis	ZFP90	ZFP90 Zinc Finger Protein	Protein Coding	40	GC16P068530	15.7423	https://www.genecards.org/cgi-bin/carddisp.pl?gene=ZFP90
Ulcerative colitis	S100A8	S100 Calcium Binding Protein A8	Protein Coding	48	GC01M153391	15.6714	https://www.genecards.org/cgi-bin/carddisp.pl?gene=S100A8
Ulcerative colitis	HSPA4	Heat Shock Protein Family A (Hsp70) Member 4	Protein Coding	49	GC05P133054	15.5418	https://www.genecards.org/cgi-bin/carddisp.pl?gene=HSPA4
Ulcerative colitis	TPMT	Thiopurine S-Methyltransferase	Protein Coding	53	GC06M018128	15.5347	https://www.genecards.org/cgi-bin/carddisp.pl?gene=TPMT
Ulcerative colitis	PTPN22	Protein Tyrosine Phosphatase Non-Receptor Type 22	Protein Coding	54	GC01M113813	15.465	https://www.genecards.org/cgi-bin/carddisp.pl?gene=PTPN22
Ulcerative colitis	S100A12	S100 Calcium Binding Protein A12	Protein Coding	44	GC01M153373	15.1578	https://www.genecards.org/cgi-bin/carddisp.pl?gene=S100A12
Ulcerative colitis	HRH2	Histamine Receptor H2	Protein Coding	50	GC05P175659	15.0656	https://www.genecards.org/cgi-bin/carddisp.pl?gene=HRH2
Ulcerative colitis	LACC1	Laccase Domain Containing 1	Protein Coding	42	GC13P043879	15.0063	https://www.genecards.org/cgi-bin/carddisp.pl?gene=LACC1
Ulcerative colitis	PIK3CA	Phosphatidylinositol-4,5-Bisphosphate 3-Kinase Catalytic Subunit Alpha	Protein Coding	59	GC03P179148	14.9404	https://www.genecards.org/cgi-bin/carddisp.pl?gene=PIK3CA
Ulcerative colitis	CYBC1	Cytochrome B-245 Chaperone 1	Protein Coding	41	GC17M082443	14.8503	https://www.genecards.org/cgi-bin/carddisp.pl?gene=CYBC1
Ulcerative colitis	PTGS1	Prostaglandin-Endoperoxide Synthase 1	Protein Coding	53	GC09P122370	14.81	https://www.genecards.org/cgi-bin/carddisp.pl?gene=PTGS1
Ulcerative colitis	NCF4	Neutrophil Cytosolic Factor 4	Protein Coding	54	GC22P036860	14.8005	https://www.genecards.org/cgi-bin/carddisp.pl?gene=NCF4
Ulcerative colitis	APC	APC Regulator Of WNT Signaling Pathway	Protein Coding	56	GC05P112707	14.7596	https://www.genecards.org/cgi-bin/carddisp.pl?gene=APC
Ulcerative colitis	IL18	Interleukin 18	Protein Coding	50	GC11M112143	14.7239	https://www.genecards.org/cgi-bin/carddisp.pl?gene=IL18
Ulcerative colitis	CYP2C19	Cytochrome P450 Family 2 Subfamily C Member 19	Protein Coding	52	GC10P094762	14.6558	https://www.genecards.org/cgi-bin/carddisp.pl?gene=CYP2C19
Ulcerative colitis	CLDN18	Claudin 18	Protein Coding	50	GC03P137998	14.3987	https://www.genecards.org/cgi-bin/carddisp.pl?gene=CLDN18
Ulcerative colitis	CDH1	Cadherin 1	Protein Coding	56	GC16P068737	14.3953	https://www.genecards.org/cgi-bin/carddisp.pl?gene=CDH1
Ulcerative colitis	SMAD3	SMAD Family Member 3	Protein Coding	59	GC15P067063	14.2012	https://www.genecards.org/cgi-bin/carddisp.pl?gene=SMAD3
Ulcerative colitis	TCF4	Transcription Factor 4	Protein Coding	54	GC18M055222	14.1877	https://www.genecards.org/cgi-bin/carddisp.pl?gene=TCF4
Ulcerative colitis	ATP4A	ATPase H+/K+ Transporting Subunit Alpha	Protein Coding	47	GC19M071326	13.8229	https://www.genecards.org/cgi-bin/carddisp.pl?gene=ATP4A
Ulcerative colitis	IFNGR1	Interferon Gamma Receptor 1	Protein Coding	57	GC06M137197	13.7542	https://www.genecards.org/cgi-bin/carddisp.pl?gene=IFNGR1
Ulcerative colitis	CLDN2	Claudin 2	Protein Coding	48	GC0XP106900	13.7446	https://www.genecards.org/cgi-bin/carddisp.pl?gene=CLDN2
Ulcerative colitis	SST	Somatostatin	Protein Coding	47	GC03M187668	13.7131	https://www.genecards.org/cgi-bin/carddisp.pl?gene=SST
Ulcerative colitis	SLC22A4	Solute Carrier Family 22 Member 4	Protein Coding	52	GC05P132294	13.6345	https://www.genecards.org/cgi-bin/carddisp.pl?gene=SLC22A4
Ulcerative colitis	IL12A	Interleukin 12A	Protein Coding	51	GC03P159988	13.5224	https://www.genecards.org/cgi-bin/carddisp.pl?gene=IL12A
Ulcerative colitis	XIAP	X-Linked Inhibitor Of Apoptosis	Protein Coding	59	GC0XP123859	13.5095	https://www.genecards.org/cgi-bin/carddisp.pl?gene=XIAP
Ulcerative colitis	ADA2	Adenosine Deaminase 2	Protein Coding	47	GC22M017214	13.4223	https://www.genecards.org/cgi-bin/carddisp.pl?gene=ADA2
Ulcerative colitis	CCL2	C-C Motif Chemokine Ligand 2	Protein Coding	56	GC17P034255	13.4207	https://www.genecards.org/cgi-bin/carddisp.pl?gene=CCL2
Ulcerative colitis	CD8A	CD8a Molecule	Protein Coding	54	GC02M086784	13.3757	https://www.genecards.org/cgi-bin/carddisp.pl?gene=CD8A
Ulcerative colitis	MUC12	Mucin 12, Cell Surface Associated	Protein Coding	40	GC07P100969	13.3594	https://www.genecards.org/cgi-bin/carddisp.pl?gene=MUC12
Ulcerative colitis	CAT	Catalase	Protein Coding	58	GC11P034460	13.2962	https://www.genecards.org/cgi-bin/carddisp.pl?gene=CAT
Ulcerative colitis	GATA3	GATA Binding Protein 3	Protein Coding	56	GC10P008045	13.2379	https://www.genecards.org/cgi-bin/carddisp.pl?gene=GATA3
Ulcerative colitis	MET	MET Proto-Oncogene, Receptor Tyrosine Kinase	Protein Coding	61	GC07P116672	13.2183	https://www.genecards.org/cgi-bin/carddisp.pl?gene=MET
Ulcerative colitis	CARD9	Caspase Recruitment Domain Family Member 9	Protein Coding	51	GC09M136364	13.1345	https://www.genecards.org/cgi-bin/carddisp.pl?gene=CARD9
Ulcerative colitis	MMP9	Matrix Metallopeptidase 9	Protein Coding	61	GC20P046008	13.0577	https://www.genecards.org/cgi-bin/carddisp.pl?gene=MMP9
Ulcerative colitis	FGF2	Fibroblast Growth Factor 2	Protein Coding	52	GC04P122826	13.0324	https://www.genecards.org/cgi-bin/carddisp.pl?gene=FGF2
Ulcerative colitis	CD40LG	CD40 Ligand	Protein Coding	57	GC0XP136649	12.9922	https://www.genecards.org/cgi-bin/carddisp.pl?gene=CD40LG
Ulcerative colitis	FGFR2	Fibroblast Growth Factor Receptor 2	Protein Coding	63	GC10M121478	12.8743	https://www.genecards.org/cgi-bin/carddisp.pl?gene=FGFR2
Ulcerative colitis	C4A	Complement C4A (Rodgers Blood Group)	Protein Coding	50	GC06P092175	12.8315	https://www.genecards.org/cgi-bin/carddisp.pl?gene=C4A
Ulcerative colitis	EGF	Epidermal Growth Factor	Protein Coding	58	GC04P109912	12.8299	https://www.genecards.org/cgi-bin/carddisp.pl?gene=EGF
Ulcerative colitis	NOD1	Nucleotide Binding Oligomerization Domain Containing 1	Protein Coding	50	GC07M030424	12.7659	https://www.genecards.org/cgi-bin/carddisp.pl?gene=NOD1
Ulcerative colitis	CCR1	C-C Motif Chemokine Receptor 1	Protein Coding	52	GC03M046218	12.7566	https://www.genecards.org/cgi-bin/carddisp.pl?gene=CCR1
Ulcerative colitis	SOCS1	Suppressor Of Cytokine Signaling 1	Protein Coding	52	GC16M012467	12.6426	https://www.genecards.org/cgi-bin/carddisp.pl?gene=SOCS1
Ulcerative colitis	RIPK1	Receptor Interacting Serine/Threonine Kinase 1	Protein Coding	56	GC06P003333	12.6381	https://www.genecards.org/cgi-bin/carddisp.pl?gene=RIPK1
Ulcerative colitis	DUOX2	Dual Oxidase 2	Protein Coding	51	GC15M045092	12.5243	https://www.genecards.org/cgi-bin/carddisp.pl?gene=DUOX2
Ulcerative colitis	NCF1	Neutrophil Cytosolic Factor 1	Protein Coding	53	GC07P076426	12.497	https://www.genecards.org/cgi-bin/carddisp.pl?gene=NCF1
Ulcerative colitis	CARD8	Caspase Recruitment Domain Family Member 8	Protein Coding	46	GC19M070832	12.4448	https://www.genecards.org/cgi-bin/carddisp.pl?gene=CARD8
Ulcerative colitis	VDR	Vitamin D Receptor	Protein Coding	56	GC12M047841	12.3972	https://www.genecards.org/cgi-bin/carddisp.pl?gene=VDR
Ulcerative colitis	UCN	Urocortin	Protein Coding	42	GC02M027308	12.3739	https://www.genecards.org/cgi-bin/carddisp.pl?gene=UCN
Ulcerative colitis	BRAF	B-Raf Proto-Oncogene, Serine/Threonine Kinase	Protein Coding	60	GC07M140742	12.3002	https://www.genecards.org/cgi-bin/carddisp.pl?gene=BRAF
Ulcerative colitis	KRAS	KRAS Proto-Oncogene, GTPase	Protein Coding	59	GC12M025204	12.2751	https://www.genecards.org/cgi-bin/carddisp.pl?gene=KRAS
Ulcerative colitis	HLA-DQB1	Major Histocompatibility Complex, Class II, DQ Beta 1	Protein Coding	48	GC06M071781	12.2603	https://www.genecards.org/cgi-bin/carddisp.pl?gene=HLA-DQB1
Ulcerative colitis	SLC22A5	Solute Carrier Family 22 Member 5	Protein Coding	53	GC05P132369	12.2081	https://www.genecards.org/cgi-bin/carddisp.pl?gene=SLC22A5
Ulcerative colitis	F2	Coagulation Factor II, Thrombin	Protein Coding	56	GC11P046720	12.181	https://www.genecards.org/cgi-bin/carddisp.pl?gene=F2
Ulcerative colitis	IL12B	Interleukin 12B	Protein Coding	51	GC05M159314	12.1667	https://www.genecards.org/cgi-bin/carddisp.pl?gene=IL12B
Ulcerative colitis	ERAP1	Endoplasmic Reticulum Aminopeptidase 1	Protein Coding	53	GC05M096760	12.1364	https://www.genecards.org/cgi-bin/carddisp.pl?gene=ERAP1
Ulcerative colitis	KLRC4	Killer Cell Lectin Like Receptor C4	Protein Coding	43	GC12M022631	12.1347	https://www.genecards.org/cgi-bin/carddisp.pl?gene=KLRC4
Ulcerative colitis	ICAM1	Intercellular Adhesion Molecule 1	Protein Coding	57	GC19P010749	12.1331	https://www.genecards.org/cgi-bin/carddisp.pl?gene=ICAM1
Ulcerative colitis	CDKN1A	Cyclin Dependent Kinase Inhibitor 1A	Protein Coding	55	GC06P092294	12.1203	https://www.genecards.org/cgi-bin/carddisp.pl?gene=CDKN1A
Ulcerative colitis	WAS	WASP Actin Nucleation Promoting Factor	Protein Coding	55	GC0XP048676	12.0164	https://www.genecards.org/cgi-bin/carddisp.pl?gene=WAS
Ulcerative colitis	JAK2	Janus Kinase 2	Protein Coding	60	GC09P004985	11.9289	https://www.genecards.org/cgi-bin/carddisp.pl?gene=JAK2
Ulcerative colitis	DEFB4A	Defensin Beta 4A	Protein Coding	42	GC08P007900	11.8553	https://www.genecards.org/cgi-bin/carddisp.pl?gene=DEFB4A
Ulcerative colitis	IL21	Interleukin 21	Protein Coding	51	GC04M122612	11.834	https://www.genecards.org/cgi-bin/carddisp.pl?gene=IL21
Ulcerative colitis	MIR126	MicroRNA 126	RNA Gene	25	GC09P136670	11.6953	https://www.genecards.org/cgi-bin/carddisp.pl?gene=MIR126
Ulcerative colitis	ICOSLG	Inducible T Cell Costimulator Ligand	Protein Coding	48	GC21M044222	11.6854	https://www.genecards.org/cgi-bin/carddisp.pl?gene=ICOSLG
Ulcerative colitis	SLC37A4	Solute Carrier Family 37 Member 4	Protein Coding	48	GC11M119266	11.6707	https://www.genecards.org/cgi-bin/carddisp.pl?gene=SLC37A4
Ulcerative colitis	IL2RA	Interleukin 2 Receptor Subunit Alpha	Protein Coding	57	GC10M006010	11.6539	https://www.genecards.org/cgi-bin/carddisp.pl?gene=IL2RA
Ulcerative colitis	CHGA	Chromogranin A	Protein Coding	50	GC14P092950	11.6198	https://www.genecards.org/cgi-bin/carddisp.pl?gene=CHGA
Ulcerative colitis	H19	H19 Imprinted Maternally Expressed Transcript	RNA Gene	30	GC11M001995	11.5817	https://www.genecards.org/cgi-bin/carddisp.pl?gene=H19
Ulcerative colitis	NTRK1	Neurotrophic Receptor Tyrosine Kinase 1	Protein Coding	57	GC01P156815	11.5379	https://www.genecards.org/cgi-bin/carddisp.pl?gene=NTRK1
Ulcerative colitis	HLA-A	Major Histocompatibility Complex, Class I, A	Protein Coding	52	GC06P092113	11.4777	https://www.genecards.org/cgi-bin/carddisp.pl?gene=HLA-A
Ulcerative colitis	NGF	Nerve Growth Factor	Protein Coding	58	GC01M115285	11.3422	https://www.genecards.org/cgi-bin/carddisp.pl?gene=NGF
Ulcerative colitis	IL23A	Interleukin 23 Subunit Alpha	Protein Coding	46	GC12P057557	11.3268	https://www.genecards.org/cgi-bin/carddisp.pl?gene=IL23A
Ulcerative colitis	ATP12A	ATPase H+/K+ Transporting Non-Gastric Alpha2 Subunit	Protein Coding	49	GC13P024680	11.3116	https://www.genecards.org/cgi-bin/carddisp.pl?gene=ATP12A
Ulcerative colitis	TFF2	Trefoil Factor 2	Protein Coding	48	GC21M042346	11.268	https://www.genecards.org/cgi-bin/carddisp.pl?gene=TFF2
Ulcerative colitis	IL7R	Interleukin 7 Receptor	Protein Coding	52	GC05P035852	11.2466	https://www.genecards.org/cgi-bin/carddisp.pl?gene=IL7R
Ulcerative colitis	CP	Ceruloplasmin	Protein Coding	55	GC03M149162	11.1579	https://www.genecards.org/cgi-bin/carddisp.pl?gene=CP
Ulcerative colitis	CARMIL2	Capping Protein Regulator And Myosin 1 Linker 2	Protein Coding	42	GC16P067644	11.1442	https://www.genecards.org/cgi-bin/carddisp.pl?gene=CARMIL2
Ulcerative colitis	STAT1	Signal Transducer And Activator Of Transcription 1	Protein Coding	60	GC02M190908	11.0862	https://www.genecards.org/cgi-bin/carddisp.pl?gene=STAT1
Ulcerative colitis	UBAC2	UBA Domain Containing 2	Protein Coding	44	GC13P099200	11.0763	https://www.genecards.org/cgi-bin/carddisp.pl?gene=UBAC2
Ulcerative colitis	S100A9	S100 Calcium Binding Protein A9	Protein Coding	50	GC01P153357	11.0763	https://www.genecards.org/cgi-bin/carddisp.pl?gene=S100A9
Ulcerative colitis	CCND1	Cyclin D1	Protein Coding	60	GC11P069641	11.0219	https://www.genecards.org/cgi-bin/carddisp.pl?gene=CCND1
Ulcerative colitis	FGFR3	Fibroblast Growth Factor Receptor 3	Protein Coding	63	GC04P001795	11.0182	https://www.genecards.org/cgi-bin/carddisp.pl?gene=FGFR3
Ulcerative colitis	TLR5	Toll Like Receptor 5	Protein Coding	53	GC01M223109	10.9913	https://www.genecards.org/cgi-bin/carddisp.pl?gene=TLR5
Ulcerative colitis	BAX	BCL2 Associated X, Apoptosis Regulator	Protein Coding	57	GC19P048954	10.9888	https://www.genecards.org/cgi-bin/carddisp.pl?gene=BAX
Ulcerative colitis	IFNG-AS1	IFNG Antisense RNA 1	RNA Gene	21	GC12P067989	10.9706	https://www.genecards.org/cgi-bin/carddisp.pl?gene=IFNG-AS1
Ulcerative colitis	BACH2	BTB Domain And CNC Homolog 2	Protein Coding	50	GC06M089926	10.9564	https://www.genecards.org/cgi-bin/carddisp.pl?gene=BACH2
Ulcerative colitis	CSF2	Colony Stimulating Factor 2	Protein Coding	51	GC05P132073	10.9435	https://www.genecards.org/cgi-bin/carddisp.pl?gene=CSF2
Ulcerative colitis	TYK2	Tyrosine Kinase 2	Protein Coding	60	GC19M010350	10.9077	https://www.genecards.org/cgi-bin/carddisp.pl?gene=TYK2
Ulcerative colitis	SEMA4D	Semaphorin 4D	Protein Coding	53	GC09M089360	10.8876	https://www.genecards.org/cgi-bin/carddisp.pl?gene=SEMA4D
Ulcerative colitis	TNFRSF1B	TNF Receptor Superfamily Member 1B	Protein Coding	56	GC01P012301	10.8542	https://www.genecards.org/cgi-bin/carddisp.pl?gene=TNFRSF1B
Ulcerative colitis	MTHFR	Methylenetetrahydrofolate Reductase	Protein Coding	54	GC01M011785	10.8356	https://www.genecards.org/cgi-bin/carddisp.pl?gene=MTHFR
Ulcerative colitis	F3	Coagulation Factor III, Tissue Factor	Protein Coding	52	GC01M094610	10.7993	https://www.genecards.org/cgi-bin/carddisp.pl?gene=F3
Ulcerative colitis	TIMP1	TIMP Metallopeptidase Inhibitor 1	Protein Coding	52	GC0XP047711	10.6809	https://www.genecards.org/cgi-bin/carddisp.pl?gene=TIMP1
Ulcerative colitis	PALB2	Partner And Localizer Of BRCA2	Protein Coding	51	GC16M023603	10.6081	https://www.genecards.org/cgi-bin/carddisp.pl?gene=PALB2
Ulcerative colitis	CCL11	C-C Motif Chemokine Ligand 11	Protein Coding	52	GC17P034285	10.5798	https://www.genecards.org/cgi-bin/carddisp.pl?gene=CCL11
Ulcerative colitis	MIF	Macrophage Migration Inhibitory Factor	Protein Coding	55	GC22P023894	10.5561	https://www.genecards.org/cgi-bin/carddisp.pl?gene=MIF
Ulcerative colitis	IL17F	Interleukin 17F	Protein Coding	50	GC06M072074	10.5007	https://www.genecards.org/cgi-bin/carddisp.pl?gene=IL17F
Ulcerative colitis	POLD1	DNA Polymerase Delta 1, Catalytic Subunit	Protein Coding	52	GC19P073291	10.4919	https://www.genecards.org/cgi-bin/carddisp.pl?gene=POLD1
Ulcerative colitis	CD14	CD14 Molecule	Protein Coding	53	GC05M140631	10.424	https://www.genecards.org/cgi-bin/carddisp.pl?gene=CD14
Ulcerative colitis	CDKN1B	Cyclin Dependent Kinase Inhibitor 1B	Protein Coding	54	GC12P023759	10.4105	https://www.genecards.org/cgi-bin/carddisp.pl?gene=CDKN1B
Ulcerative colitis	LTA	Lymphotoxin Alpha	Protein Coding	49	GC06P092152	10.4042	https://www.genecards.org/cgi-bin/carddisp.pl?gene=LTA
Ulcerative colitis	TFF3	Trefoil Factor 3	Protein Coding	47	GC21M042311	10.3697	https://www.genecards.org/cgi-bin/carddisp.pl?gene=TFF3
Ulcerative colitis	F5	Coagulation Factor V	Protein Coding	53	GC01M169511	10.3684	https://www.genecards.org/cgi-bin/carddisp.pl?gene=F5
Ulcerative colitis	SERPINC1	Serpin Family C Member 1	Protein Coding	56	GC01M174653	10.3139	https://www.genecards.org/cgi-bin/carddisp.pl?gene=SERPINC1
Ulcerative colitis	ELF4	E74 Like ETS Transcription Factor 4	Protein Coding	47	GC0XM130064	10.3101	https://www.genecards.org/cgi-bin/carddisp.pl?gene=ELF4
Ulcerative colitis	HLA-DQA1	Major Histocompatibility Complex, Class II, DQ Alpha 1	Protein Coding	48	GC06P092182	10.2885	https://www.genecards.org/cgi-bin/carddisp.pl?gene=HLA-DQA1
Ulcerative colitis	HP	Haptoglobin	Protein Coding	52	GC16P072372	10.2848	https://www.genecards.org/cgi-bin/carddisp.pl?gene=HP
Ulcerative colitis	PLG	Plasminogen	Protein Coding	56	GC06P160702	10.2623	https://www.genecards.org/cgi-bin/carddisp.pl?gene=PLG
Ulcerative colitis	PEPD	Peptidase D	Protein Coding	52	GC19M033386	10.2565	https://www.genecards.org/cgi-bin/carddisp.pl?gene=PEPD
Ulcerative colitis	RNASE3	Ribonuclease A Family Member 3	Protein Coding	46	GC14P020891	10.2387	https://www.genecards.org/cgi-bin/carddisp.pl?gene=RNASE3
Ulcerative colitis	MVK	Mevalonate Kinase	Protein Coding	54	GC12P109573	10.2071	https://www.genecards.org/cgi-bin/carddisp.pl?gene=MVK
Ulcerative colitis	RTEL1	Regulator Of Telomere Elongation Helicase 1	Protein Coding	48	GC20P063658	10.116	https://www.genecards.org/cgi-bin/carddisp.pl?gene=RTEL1
Ulcerative colitis	CIITA	Class II Major Histocompatibility Complex Transactivator	Protein Coding	51	GC16P013730	10.0612	https://www.genecards.org/cgi-bin/carddisp.pl?gene=CIITA
Ulcerative colitis	KIT	KIT Proto-Oncogene, Receptor Tyrosine Kinase	Protein Coding	60	GC04P054657	10.0461	https://www.genecards.org/cgi-bin/carddisp.pl?gene=KIT
Ulcerative colitis	MMP3	Matrix Metallopeptidase 3	Protein Coding	57	GC11M102835	10.0422	https://www.genecards.org/cgi-bin/carddisp.pl?gene=MMP3
Ulcerative colitis	TLR9	Toll Like Receptor 9	Protein Coding	53	GC03M052222	10.0237	https://www.genecards.org/cgi-bin/carddisp.pl?gene=TLR9
Ulcerative colitis	PTPRC	Protein Tyrosine Phosphatase Receptor Type C	Protein Coding	59	GC01P198607	9.97652	https://www.genecards.org/cgi-bin/carddisp.pl?gene=PTPRC
Ulcerative colitis	FCGR2A	Fc Gamma Receptor IIa	Protein Coding	55	GC01P161505	9.93769	https://www.genecards.org/cgi-bin/carddisp.pl?gene=FCGR2A
Ulcerative colitis	PLCG2	Phospholipase C Gamma 2	Protein Coding	58	GC16P081773	9.93094	https://www.genecards.org/cgi-bin/carddisp.pl?gene=PLCG2
Ulcerative colitis	PDGFB	Platelet Derived Growth Factor Subunit B	Protein Coding	58	GC22M062326	9.89605	https://www.genecards.org/cgi-bin/carddisp.pl?gene=PDGFB
Ulcerative colitis	ZAP70	Zeta Chain Of T Cell Receptor Associated Protein Kinase 70	Protein Coding	59	GC02P097773	9.8657	https://www.genecards.org/cgi-bin/carddisp.pl?gene=ZAP70
Ulcerative colitis	IBD3	Inflammatory Bowel Disease 3	Genetic Locus	3	GC06U990223	9.84254	https://www.genecards.org/cgi-bin/carddisp.pl?gene=IBD3
Ulcerative colitis	ERBB2	Erb-B2 Receptor Tyrosine Kinase 2	Protein Coding	62	GC17P039687	9.84119	https://www.genecards.org/cgi-bin/carddisp.pl?gene=ERBB2
Ulcerative colitis	SPP1	Secreted Phosphoprotein 1	Protein Coding	53	GC04P087975	9.80219	https://www.genecards.org/cgi-bin/carddisp.pl?gene=SPP1
Ulcerative colitis	TP63	Tumor Protein P63	Protein Coding	53	GC03P189598	9.7207	https://www.genecards.org/cgi-bin/carddisp.pl?gene=TP63
Ulcerative colitis	LOC106029312	Williams-Beuren Syndrome Medial Block B Recombination Region	Functional Element	4	GC07P074733	9.71981	https://www.genecards.org/cgi-bin/carddisp.pl?gene=LOC106029312
Ulcerative colitis	MAP3K7	Mitogen-Activated Protein Kinase Kinase Kinase 7	Protein Coding	57	GC06M090513	9.68186	https://www.genecards.org/cgi-bin/carddisp.pl?gene=MAP3K7
Ulcerative colitis	CDKN2A	Cyclin Dependent Kinase Inhibitor 2A	Protein Coding	57	GC09M021967	9.6646	https://www.genecards.org/cgi-bin/carddisp.pl?gene=CDKN2A
Ulcerative colitis	INS	Insulin	Protein Coding	55	GC11M002159	9.64115	https://www.genecards.org/cgi-bin/carddisp.pl?gene=INS
Ulcerative colitis	CALCA	Calcitonin Related Polypeptide Alpha	Protein Coding	50	GC11M014945	9.62271	https://www.genecards.org/cgi-bin/carddisp.pl?gene=CALCA
Ulcerative colitis	TFF1	Trefoil Factor 1	Protein Coding	49	GC21M042362	9.58057	https://www.genecards.org/cgi-bin/carddisp.pl?gene=TFF1
Ulcerative colitis	FERMT1	FERM Domain Containing Kindlin 1	Protein Coding	50	GC20M006074	9.56296	https://www.genecards.org/cgi-bin/carddisp.pl?gene=FERMT1
Ulcerative colitis	ITGB2	Integrin Subunit Beta 2	Protein Coding	57	GC21M044885	9.52508	https://www.genecards.org/cgi-bin/carddisp.pl?gene=ITGB2
Ulcerative colitis	HPS1	HPS1 Biogenesis Of Lysosomal Organelles Complex 3 Subunit 1	Protein Coding	48	GC10M098410	9.48039	https://www.genecards.org/cgi-bin/carddisp.pl?gene=HPS1
Ulcerative colitis	HLA-C	Major Histocompatibility Complex, Class I, C	Protein Coding	51	GC06M071681	9.40002	https://www.genecards.org/cgi-bin/carddisp.pl?gene=HLA-C
Ulcerative colitis	MADCAM1	Mucosal Vascular Addressin Cell Adhesion Molecule 1	Protein Coding	47	GC19P003487	9.38698	https://www.genecards.org/cgi-bin/carddisp.pl?gene=MADCAM1
Ulcerative colitis	CYP3A4	Cytochrome P450 Family 3 Subfamily A Member 4	Protein Coding	56	GC07M099759	9.34684	https://www.genecards.org/cgi-bin/carddisp.pl?gene=CYP3A4
Ulcerative colitis	PDCD1	Programmed Cell Death 1	Protein Coding	55	GC02M241849	9.34523	https://www.genecards.org/cgi-bin/carddisp.pl?gene=PDCD1
Ulcerative colitis	FGF7	Fibroblast Growth Factor 7	Protein Coding	50	GC15P049423	9.32022	https://www.genecards.org/cgi-bin/carddisp.pl?gene=FGF7
Ulcerative colitis	PLA2G2A	Phospholipase A2 Group IIA	Protein Coding	53	GC01M019975	9.29602	https://www.genecards.org/cgi-bin/carddisp.pl?gene=PLA2G2A
Ulcerative colitis	ITGAM	Integrin Subunit Alpha M	Protein Coding	55	GC16P042850	9.28179	https://www.genecards.org/cgi-bin/carddisp.pl?gene=ITGAM
Ulcerative colitis	CXCL10	C-X-C Motif Chemokine Ligand 10	Protein Coding	51	GC04M076021	9.26665	https://www.genecards.org/cgi-bin/carddisp.pl?gene=CXCL10
Ulcerative colitis	HGF	Hepatocyte Growth Factor	Protein Coding	58	GC07M081699	9.24064	https://www.genecards.org/cgi-bin/carddisp.pl?gene=HGF
Ulcerative colitis	CYLD	CYLD Lysine 63 Deubiquitinase	Protein Coding	55	GC16P050742	9.21288	https://www.genecards.org/cgi-bin/carddisp.pl?gene=CYLD
Ulcerative colitis	CSF3	Colony Stimulating Factor 3	Protein Coding	47	GC17P040015	9.15326	https://www.genecards.org/cgi-bin/carddisp.pl?gene=CSF3
Ulcerative colitis	FOXD2-AS1	FOXD2 Adjacent Opposite Strand RNA 1	RNA Gene	19	GC01M047432	9.14663	https://www.genecards.org/cgi-bin/carddisp.pl?gene=FOXD2-AS1
Ulcerative colitis	IL1A	Interleukin 1 Alpha	Protein Coding	52	GC02M112773	9.0741	https://www.genecards.org/cgi-bin/carddisp.pl?gene=IL1A
Ulcerative colitis	MIR34A	MicroRNA 34a	RNA Gene	25	GC01M009154	9.06023	https://www.genecards.org/cgi-bin/carddisp.pl?gene=MIR34A
Ulcerative colitis	MASP2	MBL Associated Serine Protease 2	Protein Coding	53	GC01M011026	9.05783	https://www.genecards.org/cgi-bin/carddisp.pl?gene=MASP2
Ulcerative colitis	NCF4-AS1	NCF4 Antisense RNA 1	RNA Gene	18	GC22M061453	9.03864	https://www.genecards.org/cgi-bin/carddisp.pl?gene=NCF4-AS1
Ulcerative colitis	EP300	E1A Binding Protein P300	Protein Coding	59	GC22P045272	9.01679	https://www.genecards.org/cgi-bin/carddisp.pl?gene=EP300
Ulcerative colitis	CDKN2B	Cyclin Dependent Kinase Inhibitor 2B	Protein Coding	53	GC09M022002	9.003	https://www.genecards.org/cgi-bin/carddisp.pl?gene=CDKN2B
Ulcerative colitis	MIR145	MicroRNA 145	RNA Gene	26	GC05P149430	8.99196	https://www.genecards.org/cgi-bin/carddisp.pl?gene=MIR145
Ulcerative colitis	MIR143	MicroRNA 143	RNA Gene	26	GC05P149414	8.97274	https://www.genecards.org/cgi-bin/carddisp.pl?gene=MIR143
Ulcerative colitis	ITGA4	Integrin Subunit Alpha 4	Protein Coding	55	GC02P181456	8.94413	https://www.genecards.org/cgi-bin/carddisp.pl?gene=ITGA4
Ulcerative colitis	RET	Ret Proto-Oncogene	Protein Coding	61	GC10P043237	8.8905	https://www.genecards.org/cgi-bin/carddisp.pl?gene=RET
Ulcerative colitis	BCL10	BCL10 Immune Signaling Adaptor	Protein Coding	51	GC01M085265	8.87744	https://www.genecards.org/cgi-bin/carddisp.pl?gene=BCL10
Ulcerative colitis	IGF2	Insulin Like Growth Factor 2	Protein Coding	55	GC11M004506	8.84536	https://www.genecards.org/cgi-bin/carddisp.pl?gene=IGF2
Ulcerative colitis	MMP2	Matrix Metallopeptidase 2	Protein Coding	60	GC16P055390	8.80491	https://www.genecards.org/cgi-bin/carddisp.pl?gene=MMP2
Ulcerative colitis	EGFR	Epidermal Growth Factor Receptor	Protein Coding	62	GC07P055019	8.78639	https://www.genecards.org/cgi-bin/carddisp.pl?gene=EGFR
Ulcerative colitis	NPM1	Nucleophosmin 1	Protein Coding	57	GC05P171387	8.77427	https://www.genecards.org/cgi-bin/carddisp.pl?gene=NPM1
Ulcerative colitis	MICA	MHC Class I Polypeptide-Related Sequence A	Protein Coding	46	GC06P031399	8.76631	https://www.genecards.org/cgi-bin/carddisp.pl?gene=MICA
Ulcerative colitis	CD40	CD40 Molecule	Protein Coding	57	GC20P046118	8.724	https://www.genecards.org/cgi-bin/carddisp.pl?gene=CD40
Ulcerative colitis	ATM	ATM Serine/Threonine Kinase	Protein Coding	60	GC11P108222	8.71384	https://www.genecards.org/cgi-bin/carddisp.pl?gene=ATM
Ulcerative colitis	LCN2	Lipocalin 2	Protein Coding	52	GC09P128149	8.71374	https://www.genecards.org/cgi-bin/carddisp.pl?gene=LCN2
Ulcerative colitis	CCK	Cholecystokinin	Protein Coding	48	GC03M042274	8.68843	https://www.genecards.org/cgi-bin/carddisp.pl?gene=CCK
Ulcerative colitis	G6PC3	Glucose-6-Phosphatase Catalytic Subunit 3	Protein Coding	48	GC17P044070	8.68679	https://www.genecards.org/cgi-bin/carddisp.pl?gene=G6PC3
Ulcerative colitis	VCAM1	Vascular Cell Adhesion Molecule 1	Protein Coding	52	GC01P100719	8.66875	https://www.genecards.org/cgi-bin/carddisp.pl?gene=VCAM1
Ulcerative colitis	CTSG	Cathepsin G	Protein Coding	52	GC14M024573	8.61791	https://www.genecards.org/cgi-bin/carddisp.pl?gene=CTSG
Ulcerative colitis	IBD21	Inflammatory Bowel Disease-21	Genetic Locus	2	GC18U900466	8.56527	https://www.genecards.org/cgi-bin/carddisp.pl?gene=IBD21
Ulcerative colitis	CD80	CD80 Molecule	Protein Coding	51	GC03M119524	8.5521	https://www.genecards.org/cgi-bin/carddisp.pl?gene=CD80
Ulcerative colitis	PTPN2	Protein Tyrosine Phosphatase Non-Receptor Type 2	Protein Coding	54	GC18M027584	8.48683	https://www.genecards.org/cgi-bin/carddisp.pl?gene=PTPN2
Ulcerative colitis	MIR141	MicroRNA 141	RNA Gene	24	GC12P023565	8.43878	https://www.genecards.org/cgi-bin/carddisp.pl?gene=MIR141
Ulcerative colitis	EPCAM	Epithelial Cell Adhesion Molecule	Protein Coding	56	GC02P047345	8.43147	https://www.genecards.org/cgi-bin/carddisp.pl?gene=EPCAM
Ulcerative colitis	MIR192	MicroRNA 192	RNA Gene	24	GC11M064891	8.42037	https://www.genecards.org/cgi-bin/carddisp.pl?gene=MIR192
Ulcerative colitis	KRT7	Keratin 7	Protein Coding	48	GC12P052232	8.4084	https://www.genecards.org/cgi-bin/carddisp.pl?gene=KRT7
Ulcerative colitis	APOH	Apolipoprotein H	Protein Coding	51	GC17M066212	8.33927	https://www.genecards.org/cgi-bin/carddisp.pl?gene=APOH
Ulcerative colitis	CASP1	Caspase 1	Protein Coding	56	GC11M105025	8.32324	https://www.genecards.org/cgi-bin/carddisp.pl?gene=CASP1
Ulcerative colitis	NFATC1	Nuclear Factor Of Activated T Cells 1	Protein Coding	55	GC18P079395	8.28775	https://www.genecards.org/cgi-bin/carddisp.pl?gene=NFATC1
Ulcerative colitis	SELE	Selectin E	Protein Coding	50	GC01M169722	8.28471	https://www.genecards.org/cgi-bin/carddisp.pl?gene=SELE
Ulcerative colitis	DEFA5	Defensin Alpha 5	Protein Coding	43	GC08M007057	8.28096	https://www.genecards.org/cgi-bin/carddisp.pl?gene=DEFA5
Ulcerative colitis	COL7A1	Collagen Type VII Alpha 1 Chain	Protein Coding	50	GC03M048564	8.26204	https://www.genecards.org/cgi-bin/carddisp.pl?gene=COL7A1
Ulcerative colitis	PTEN	Phosphatase And Tensin Homolog	Protein Coding	59	GC10P094594	8.25138	https://www.genecards.org/cgi-bin/carddisp.pl?gene=PTEN
Ulcerative colitis	IBD5	Inflammatory Bowel Disease 5	Genetic Locus	5	GC05U990104	8.19628	https://www.genecards.org/cgi-bin/carddisp.pl?gene=IBD5
Ulcerative colitis	IL26	Interleukin 26	Protein Coding	42	GC12M068201	8.1903	https://www.genecards.org/cgi-bin/carddisp.pl?gene=IL26
Ulcerative colitis	TAC1	Tachykinin Precursor 1	Protein Coding	48	GC07P097731	8.17944	https://www.genecards.org/cgi-bin/carddisp.pl?gene=TAC1
Ulcerative colitis	SCT	Secretin	Protein Coding	39	GC11M000626	8.17632	https://www.genecards.org/cgi-bin/carddisp.pl?gene=SCT
Ulcerative colitis	MUC5AC	Mucin 5AC, Oligomeric Mucus/Gel-Forming	Protein Coding	46	GC11P002129	8.16336	https://www.genecards.org/cgi-bin/carddisp.pl?gene=MUC5AC
Ulcerative colitis	MICB	MHC Class I Polypeptide-Related Sequence B	Protein Coding	47	GC06P092149	8.12611	https://www.genecards.org/cgi-bin/carddisp.pl?gene=MICB
Ulcerative colitis	TLR7	Toll Like Receptor 7	Protein Coding	55	GC0XP012867	8.12162	https://www.genecards.org/cgi-bin/carddisp.pl?gene=TLR7
Ulcerative colitis	PRKCD	Protein Kinase C Delta	Protein Coding	59	GC03P053156	8.08579	https://www.genecards.org/cgi-bin/carddisp.pl?gene=PRKCD
Ulcerative colitis	IL11	Interleukin 11	Protein Coding	47	GC19M055364	8.07469	https://www.genecards.org/cgi-bin/carddisp.pl?gene=IL11
Ulcerative colitis	PYY	Peptide YY	Protein Coding	49	GC17M043952	8.07161	https://www.genecards.org/cgi-bin/carddisp.pl?gene=PYY
Ulcerative colitis	IGF1	Insulin Like Growth Factor 1	Protein Coding	55	GC12M102395	8.06983	https://www.genecards.org/cgi-bin/carddisp.pl?gene=IGF1
Ulcerative colitis	CCT5	Chaperonin Containing TCP1 Subunit 5	Protein Coding	51	GC05P010236	8.0333	https://www.genecards.org/cgi-bin/carddisp.pl?gene=CCT5
Ulcerative colitis	LRBA	LPS Responsive Beige-Like Anchor Protein	Protein Coding	47	GC04M150264	8.02549	https://www.genecards.org/cgi-bin/carddisp.pl?gene=LRBA
Ulcerative colitis	TAP2	Transporter 2, ATP Binding Cassette Subfamily B Member	Protein Coding	51	GC06M032821	8.01356	https://www.genecards.org/cgi-bin/carddisp.pl?gene=TAP2
Ulcerative colitis	CASP10	Caspase 10	Protein Coding	55	GC02P201182	7.99149	https://www.genecards.org/cgi-bin/carddisp.pl?gene=CASP10
Ulcerative colitis	HMOX1	Heme Oxygenase 1	Protein Coding	59	GC22P035380	7.98971	https://www.genecards.org/cgi-bin/carddisp.pl?gene=HMOX1
Ulcerative colitis	H2AC18	H2A Clustered Histone 18	Protein Coding	35	GC01M152688	7.95689	https://www.genecards.org/cgi-bin/carddisp.pl?gene=H2AC18
Ulcerative colitis	GRP	Gastrin Releasing Peptide	Protein Coding	47	GC18P059220	7.95069	https://www.genecards.org/cgi-bin/carddisp.pl?gene=GRP
Ulcerative colitis	TLR8	Toll Like Receptor 8	Protein Coding	56	GC0XP012924	7.90655	https://www.genecards.org/cgi-bin/carddisp.pl?gene=TLR8
Ulcerative colitis	DLG5	Discs Large MAGUK Scaffold Protein 5	Protein Coding	45	GC10M077790	7.89663	https://www.genecards.org/cgi-bin/carddisp.pl?gene=DLG5
Ulcerative colitis	SRC	SRC Proto-Oncogene, Non-Receptor Tyrosine Kinase	Protein Coding	58	GC20P037344	7.89215	https://www.genecards.org/cgi-bin/carddisp.pl?gene=SRC
Ulcerative colitis	GSTP1	Glutathione S-Transferase Pi 1	Protein Coding	57	GC11P067583	7.89177	https://www.genecards.org/cgi-bin/carddisp.pl?gene=GSTP1
Ulcerative colitis	SH2D1A	SH2 Domain Containing 1A	Protein Coding	53	GC0XP124227	7.87178	https://www.genecards.org/cgi-bin/carddisp.pl?gene=SH2D1A
Ulcerative colitis	RIPK2	Receptor Interacting Serine/Threonine Kinase 2	Protein Coding	53	GC08P089823	7.84219	https://www.genecards.org/cgi-bin/carddisp.pl?gene=RIPK2
Ulcerative colitis	TERT	Telomerase Reverse Transcriptase	Protein Coding	58	GC05M001253	7.83684	https://www.genecards.org/cgi-bin/carddisp.pl?gene=TERT
Ulcerative colitis	LAMA3	Laminin Subunit Alpha 3	Protein Coding	51	GC18P023689	7.80287	https://www.genecards.org/cgi-bin/carddisp.pl?gene=LAMA3
Ulcerative colitis	SERPINE1	Serpin Family E Member 1	Protein Coding	57	GC07P101127	7.79966	https://www.genecards.org/cgi-bin/carddisp.pl?gene=SERPINE1
Ulcerative colitis	CLDN4	Claudin 4	Protein Coding	46	GC07P073799	7.79058	https://www.genecards.org/cgi-bin/carddisp.pl?gene=CLDN4
Ulcerative colitis	PSC	Cholangitis, Primary Sclerosing	Genetic Locus	2	GC03U901834	7.78592	https://www.genecards.org/cgi-bin/carddisp.pl?gene=PSC
Ulcerative colitis	ARID1A	AT-Rich Interaction Domain 1A	Protein Coding	52	GC01P026693	7.7252	https://www.genecards.org/cgi-bin/carddisp.pl?gene=ARID1A
Ulcerative colitis	CCL20	C-C Motif Chemokine Ligand 20	Protein Coding	49	GC02P227846	7.65749	https://www.genecards.org/cgi-bin/carddisp.pl?gene=CCL20
Ulcerative colitis	TJP1	Tight Junction Protein 1	Protein Coding	51	GC15M029699	7.65229	https://www.genecards.org/cgi-bin/carddisp.pl?gene=TJP1
Ulcerative colitis	IBD2	Inflammatory Bowel Disease 2	Genetic Locus	5	GC12U990041	7.63794	https://www.genecards.org/cgi-bin/carddisp.pl?gene=IBD2
Ulcerative colitis	CCL5	C-C Motif Chemokine Ligand 5	Protein Coding	51	GC17M035871	7.62665	https://www.genecards.org/cgi-bin/carddisp.pl?gene=CCL5
Ulcerative colitis	CDX2	Caudal Type Homeobox 2	Protein Coding	48	GC13M027962	7.62624	https://www.genecards.org/cgi-bin/carddisp.pl?gene=CDX2
Ulcerative colitis	SOD1	Superoxide Dismutase 1	Protein Coding	60	GC21P031659	7.62467	https://www.genecards.org/cgi-bin/carddisp.pl?gene=SOD1
Ulcerative colitis	XDH	Xanthine Dehydrogenase	Protein Coding	54	GC02M031334	7.58477	https://www.genecards.org/cgi-bin/carddisp.pl?gene=XDH
Ulcerative colitis	CCL3	C-C Motif Chemokine Ligand 3	Protein Coding	46	GC17M036088	7.58088	https://www.genecards.org/cgi-bin/carddisp.pl?gene=CCL3
Ulcerative colitis	CYP2D6	Cytochrome P450 Family 2 Subfamily D Member 6	Protein Coding	53	GC22M042126	7.57442	https://www.genecards.org/cgi-bin/carddisp.pl?gene=CYP2D6
Ulcerative colitis	HPS4	HPS4 Biogenesis Of Lysosomal Organelles Complex 3 Subunit 2	Protein Coding	46	GC22M026443	7.57261	https://www.genecards.org/cgi-bin/carddisp.pl?gene=HPS4
Ulcerative colitis	HLA-DRA	Major Histocompatibility Complex, Class II, DR Alpha	Protein Coding	51	GC06P032439	7.56608	https://www.genecards.org/cgi-bin/carddisp.pl?gene=HLA-DRA
Ulcerative colitis	CXCL12	C-X-C Motif Chemokine Ligand 12	Protein Coding	51	GC10M044370	7.56204	https://www.genecards.org/cgi-bin/carddisp.pl?gene=CXCL12
Ulcerative colitis	STXBP2	Syntaxin Binding Protein 2	Protein Coding	51	GC19P007948	7.55129	https://www.genecards.org/cgi-bin/carddisp.pl?gene=STXBP2
Ulcerative colitis	BCL2	BCL2 Apoptosis Regulator	Protein Coding	57	GC18M063123	7.54779	https://www.genecards.org/cgi-bin/carddisp.pl?gene=BCL2
Ulcerative colitis	SLC26A3	Solute Carrier Family 26 Member 3	Protein Coding	51	GC07M107765	7.53919	https://www.genecards.org/cgi-bin/carddisp.pl?gene=SLC26A3
Ulcerative colitis	TGFA	Transforming Growth Factor Alpha	Protein Coding	53	GC02M070447	7.53377	https://www.genecards.org/cgi-bin/carddisp.pl?gene=TGFA
Ulcerative colitis	SOCS3	Suppressor Of Cytokine Signaling 3	Protein Coding	50	GC17M078356	7.531	https://www.genecards.org/cgi-bin/carddisp.pl?gene=SOCS3
Ulcerative colitis	JAK1	Janus Kinase 1	Protein Coding	60	GC01M064833	7.52346	https://www.genecards.org/cgi-bin/carddisp.pl?gene=JAK1
Ulcerative colitis	CXCL1	C-X-C Motif Chemokine Ligand 1	Protein Coding	50	GC04P073869	7.51588	https://www.genecards.org/cgi-bin/carddisp.pl?gene=CXCL1
Ulcerative colitis	NAT2	N-Acetyltransferase 2	Protein Coding	47	GC08P018391	7.47131	https://www.genecards.org/cgi-bin/carddisp.pl?gene=NAT2
Ulcerative colitis	MBL2	Mannose Binding Lectin 2	Protein Coding	53	GC10M052760	7.45263	https://www.genecards.org/cgi-bin/carddisp.pl?gene=MBL2
Ulcerative colitis	POLA1	DNA Polymerase Alpha 1, Catalytic Subunit	Protein Coding	53	GC0XP024693	7.44894	https://www.genecards.org/cgi-bin/carddisp.pl?gene=POLA1
Ulcerative colitis	VWF	Von Willebrand Factor	Protein Coding	55	GC12M005949	7.41283	https://www.genecards.org/cgi-bin/carddisp.pl?gene=VWF
Ulcerative colitis	CD55	CD55 Molecule (Cromer Blood Group)	Protein Coding	56	GC01P207321	7.40711	https://www.genecards.org/cgi-bin/carddisp.pl?gene=CD55
Ulcerative colitis	IL1RAPL2	Interleukin 1 Receptor Accessory Protein Like 2	Protein Coding	46	GC0XP104566	7.40681	https://www.genecards.org/cgi-bin/carddisp.pl?gene=IL1RAPL2
Ulcerative colitis	WRN	WRN RecQ Like Helicase	Protein Coding	53	GC08P031033	7.39369	https://www.genecards.org/cgi-bin/carddisp.pl?gene=WRN
Ulcerative colitis	TREX1	Three Prime Repair Exonuclease 1	Protein Coding	49	GC03P049976	7.39307	https://www.genecards.org/cgi-bin/carddisp.pl?gene=TREX1
Ulcerative colitis	PIK3R1	Phosphoinositide-3-Kinase Regulatory Subunit 1	Protein Coding	57	GC05P068215	7.38418	https://www.genecards.org/cgi-bin/carddisp.pl?gene=PIK3R1
Ulcerative colitis	ACE	Angiotensin I Converting Enzyme	Protein Coding	59	GC17P063477	7.37862	https://www.genecards.org/cgi-bin/carddisp.pl?gene=ACE
Ulcerative colitis	CXCR1	C-X-C Motif Chemokine Receptor 1	Protein Coding	50	GC02M218162	7.36902	https://www.genecards.org/cgi-bin/carddisp.pl?gene=CXCR1
Ulcerative colitis	CD79A	CD79a Molecule	Protein Coding	55	GC19P041877	7.36505	https://www.genecards.org/cgi-bin/carddisp.pl?gene=CD79A
Ulcerative colitis	TCN2	Transcobalamin 2	Protein Coding	50	GC22P044849	7.33776	https://www.genecards.org/cgi-bin/carddisp.pl?gene=TCN2
Ulcerative colitis	IL15	Interleukin 15	Protein Coding	49	GC04P141636	7.33572	https://www.genecards.org/cgi-bin/carddisp.pl?gene=IL15
Ulcerative colitis	PTGER4	Prostaglandin E Receptor 4	Protein Coding	52	GC05P040679	7.33565	https://www.genecards.org/cgi-bin/carddisp.pl?gene=PTGER4
Ulcerative colitis	NFE2L2	NFE2 Like BZIP Transcription Factor 2	Protein Coding	57	GC02M177227	7.3212	https://www.genecards.org/cgi-bin/carddisp.pl?gene=NFE2L2
Ulcerative colitis	GHRL	Ghrelin And Obestatin Prepropeptide	Protein Coding	49	GC03M010285	7.31964	https://www.genecards.org/cgi-bin/carddisp.pl?gene=GHRL
Ulcerative colitis	TOR1A	Torsin Family 1 Member A	Protein Coding	52	GC09M129812	7.3142	https://www.genecards.org/cgi-bin/carddisp.pl?gene=TOR1A
Ulcerative colitis	BRINP3	BMP/Retinoic Acid Inducible Neural Specific 3	Protein Coding	38	GC01M190067	7.27094	https://www.genecards.org/cgi-bin/carddisp.pl?gene=BRINP3
Ulcerative colitis	FGF10	Fibroblast Growth Factor 10	Protein Coding	53	GC05M044340	7.26397	https://www.genecards.org/cgi-bin/carddisp.pl?gene=FGF10
Ulcerative colitis	STAT5B	Signal Transducer And Activator Of Transcription 5B	Protein Coding	56	GC17M042199	7.25992	https://www.genecards.org/cgi-bin/carddisp.pl?gene=STAT5B
Ulcerative colitis	GSTM1	Glutathione S-Transferase Mu 1	Protein Coding	49	GC01P109687	7.25455	https://www.genecards.org/cgi-bin/carddisp.pl?gene=GSTM1
Ulcerative colitis	BRCA2	BRCA2 DNA Repair Associated	Protein Coding	53	GC13P032315	7.25299	https://www.genecards.org/cgi-bin/carddisp.pl?gene=BRCA2
Ulcerative colitis	BLM	BLM RecQ Like Helicase	Protein Coding	56	GC15P090717	7.24273	https://www.genecards.org/cgi-bin/carddisp.pl?gene=BLM
Ulcerative colitis	HPS3	HPS3 Biogenesis Of Lysosomal Organelles Complex 2 Subunit 1	Protein Coding	46	GC03P149129	7.23754	https://www.genecards.org/cgi-bin/carddisp.pl?gene=HPS3
Ulcerative colitis	BPI	Bactericidal Permeability Increasing Protein	Protein Coding	48	GC20P038304	7.23672	https://www.genecards.org/cgi-bin/carddisp.pl?gene=BPI
Ulcerative colitis	LGALS3	Galectin 3	Protein Coding	52	GC14P055124	7.23456	https://www.genecards.org/cgi-bin/carddisp.pl?gene=LGALS3
Ulcerative colitis	RTEL1-TNFRSF6B	RTEL1-TNFRSF6B Readthrough (NMD Candidate)	RNA Gene	22	GC20P063657	7.2302	https://www.genecards.org/cgi-bin/carddisp.pl?gene=RTEL1-TNFRSF6B
Ulcerative colitis	PECAM1	Platelet And Endothelial Cell Adhesion Molecule 1	Protein Coding	47	GC17M064319	7.22977	https://www.genecards.org/cgi-bin/carddisp.pl?gene=PECAM1
Ulcerative colitis	OCLN	Occludin	Protein Coding	51	GC05P069492	7.16842	https://www.genecards.org/cgi-bin/carddisp.pl?gene=OCLN
Ulcerative colitis	CLEC7A	C-Type Lectin Domain Containing 7A	Protein Coding	52	GC12M022628	7.14528	https://www.genecards.org/cgi-bin/carddisp.pl?gene=CLEC7A
Ulcerative colitis	PI4KA	Phosphatidylinositol 4-Kinase Alpha	Protein Coding	55	GC22M020707	7.12764	https://www.genecards.org/cgi-bin/carddisp.pl?gene=PI4KA
Ulcerative colitis	CCR5	C-C Motif Chemokine Receptor 5	Protein Coding	53	GC03P047615	7.12119	https://www.genecards.org/cgi-bin/carddisp.pl?gene=CCR5
Ulcerative colitis	POLE	DNA Polymerase Epsilon, Catalytic Subunit	Protein Coding	55	GC12M132700	7.08833	https://www.genecards.org/cgi-bin/carddisp.pl?gene=POLE
Ulcerative colitis	CXCL2	C-X-C Motif Chemokine Ligand 2	Protein Coding	46	GC04M074097	7.08115	https://www.genecards.org/cgi-bin/carddisp.pl?gene=CXCL2
Ulcerative colitis	TACR1	Tachykinin Receptor 1	Protein Coding	51	GC02M075203	7.0787	https://www.genecards.org/cgi-bin/carddisp.pl?gene=TACR1
Ulcerative colitis	MIR140	MicroRNA 140	RNA Gene	26	GC16P069934	7.06725	https://www.genecards.org/cgi-bin/carddisp.pl?gene=MIR140
Ulcerative colitis	PDGFRB	Platelet Derived Growth Factor Receptor Beta	Protein Coding	60	GC05M150113	7.06425	https://www.genecards.org/cgi-bin/carddisp.pl?gene=PDGFRB
Ulcerative colitis	TAPBP	TAP Binding Protein	Protein Coding	51	GC06M033299	7.04746	https://www.genecards.org/cgi-bin/carddisp.pl?gene=TAPBP
Ulcerative colitis	TLR3	Toll Like Receptor 3	Protein Coding	58	GC04P186059	7.0155	https://www.genecards.org/cgi-bin/carddisp.pl?gene=TLR3
Ulcerative colitis	RAB7A	RAB7A, Member RAS Oncogene Family	Protein Coding	55	GC03P134973	6.99208	https://www.genecards.org/cgi-bin/carddisp.pl?gene=RAB7A
Ulcerative colitis	MT-CO1	Mitochondrially Encoded Cytochrome C Oxidase I	Protein Coding	38	GCMTP005906	6.98995	https://www.genecards.org/cgi-bin/carddisp.pl?gene=MT-CO1
Ulcerative colitis	FCGR3A	Fc Gamma Receptor IIIa	Protein Coding	53	GC01M161541	6.98268	https://www.genecards.org/cgi-bin/carddisp.pl?gene=FCGR3A
Ulcerative colitis	RASGRP1	RAS Guanyl Releasing Protein 1	Protein Coding	54	GC15M038488	6.95317	https://www.genecards.org/cgi-bin/carddisp.pl?gene=RASGRP1
Ulcerative colitis	CD28	CD28 Molecule	Protein Coding	55	GC02P203706	6.95208	https://www.genecards.org/cgi-bin/carddisp.pl?gene=CD28
Ulcerative colitis	CHI3L1	Chitinase 3 Like 1	Protein Coding	51	GC01M203148	6.94146	https://www.genecards.org/cgi-bin/carddisp.pl?gene=CHI3L1
Ulcerative colitis	HNF4A	Hepatocyte Nuclear Factor 4 Alpha	Protein Coding	56	GC20P044355	6.93921	https://www.genecards.org/cgi-bin/carddisp.pl?gene=HNF4A
Ulcerative colitis	CTNNA1	Catenin Alpha 1	Protein Coding	52	GC05P138613	6.91019	https://www.genecards.org/cgi-bin/carddisp.pl?gene=CTNNA1
Ulcerative colitis	MIR215	MicroRNA 215	RNA Gene	22	GC01M220117	6.90841	https://www.genecards.org/cgi-bin/carddisp.pl?gene=MIR215
Ulcerative colitis	RUNX3	RUNX Family Transcription Factor 3	Protein Coding	50	GC01M024899	6.90687	https://www.genecards.org/cgi-bin/carddisp.pl?gene=RUNX3
Ulcerative colitis	NKX2-3	NK2 Homeobox 3	Protein Coding	43	GC10P099532	6.8945	https://www.genecards.org/cgi-bin/carddisp.pl?gene=NKX2-3
Ulcerative colitis	LAMC2	Laminin Subunit Gamma 2	Protein Coding	54	GC01P183186	6.89189	https://www.genecards.org/cgi-bin/carddisp.pl?gene=LAMC2
Ulcerative colitis	CYP2C9	Cytochrome P450 Family 2 Subfamily C Member 9	Protein Coding	53	GC10P094938	6.88852	https://www.genecards.org/cgi-bin/carddisp.pl?gene=CYP2C9
Ulcerative colitis	MYO1B	Myosin IB	Protein Coding	45	GC02P191246	6.88586	https://www.genecards.org/cgi-bin/carddisp.pl?gene=MYO1B
Ulcerative colitis	HBB	Hemoglobin Subunit Beta	Protein Coding	51	GC11M006827	6.88242	https://www.genecards.org/cgi-bin/carddisp.pl?gene=HBB
Ulcerative colitis	THBD	Thrombomodulin	Protein Coding	53	GC20M023026	6.86779	https://www.genecards.org/cgi-bin/carddisp.pl?gene=THBD
Ulcerative colitis	F2RL1	F2R Like Trypsin Receptor 1	Protein Coding	51	GC05P076818	6.85765	https://www.genecards.org/cgi-bin/carddisp.pl?gene=F2RL1
Ulcerative colitis	NLRP1	NLR Family Pyrin Domain Containing 1	Protein Coding	50	GC17M005499	6.85718	https://www.genecards.org/cgi-bin/carddisp.pl?gene=NLRP1
Ulcerative colitis	MLN	Motilin	Protein Coding	40	GC06M033794	6.82312	https://www.genecards.org/cgi-bin/carddisp.pl?gene=MLN
Ulcerative colitis	IL12RB2	Interleukin 12 Receptor Subunit Beta 2	Protein Coding	51	GC01P067307	6.81114	https://www.genecards.org/cgi-bin/carddisp.pl?gene=IL12RB2
Ulcerative colitis	MUC1	Mucin 1, Cell Surface Associated	Protein Coding	55	GC01M155185	6.81032	https://www.genecards.org/cgi-bin/carddisp.pl?gene=MUC1
Ulcerative colitis	CXCL5	C-X-C Motif Chemokine Ligand 5	Protein Coding	47	GC04M073995	6.81006	https://www.genecards.org/cgi-bin/carddisp.pl?gene=CXCL5
Ulcerative colitis	ALOX5	Arachidonate 5-Lipoxygenase	Protein Coding	54	GC10P045374	6.78879	https://www.genecards.org/cgi-bin/carddisp.pl?gene=ALOX5
Ulcerative colitis	AURKA	Aurora Kinase A	Protein Coding	57	GC20M056370	6.76684	https://www.genecards.org/cgi-bin/carddisp.pl?gene=AURKA
Ulcerative colitis	INPP5D	Inositol Polyphosphate-5-Phosphatase D	Protein Coding	51	GC02P233059	6.76606	https://www.genecards.org/cgi-bin/carddisp.pl?gene=INPP5D
Ulcerative colitis	GNAS	GNAS Complex Locus	Protein Coding	56	GC20P058839	6.75218	https://www.genecards.org/cgi-bin/carddisp.pl?gene=GNAS
Ulcerative colitis	F12	Coagulation Factor XII	Protein Coding	56	GC05M177402	6.74545	https://www.genecards.org/cgi-bin/carddisp.pl?gene=F12
Ulcerative colitis	NR1I2	Nuclear Receptor Subfamily 1 Group I Member 2	Protein Coding	51	GC03P119780	6.73349	https://www.genecards.org/cgi-bin/carddisp.pl?gene=NR1I2
Ulcerative colitis	DEFB103B	Defensin Beta 103B	Protein Coding	32	GC08M007430	6.72667	https://www.genecards.org/cgi-bin/carddisp.pl?gene=DEFB103B
Ulcerative colitis	PMS2	PMS1 Homolog 2, Mismatch Repair System Component	Protein Coding	55	GC07M005973	6.72627	https://www.genecards.org/cgi-bin/carddisp.pl?gene=PMS2
Ulcerative colitis	ADA	Adenosine Deaminase	Protein Coding	57	GC20M044620	6.72256	https://www.genecards.org/cgi-bin/carddisp.pl?gene=ADA
Ulcerative colitis	FUT2	Fucosyltransferase 2	Protein Coding	52	GC19P048695	6.7199	https://www.genecards.org/cgi-bin/carddisp.pl?gene=FUT2
Ulcerative colitis	AQP8	Aquaporin 8	Protein Coding	44	GC16P028323	6.7064	https://www.genecards.org/cgi-bin/carddisp.pl?gene=AQP8
Ulcerative colitis	MLH3	MutL Homolog 3	Protein Coding	48	GC14M075013	6.68401	https://www.genecards.org/cgi-bin/carddisp.pl?gene=MLH3
Ulcerative colitis	CXCR2	C-X-C Motif Chemokine Receptor 2	Protein Coding	57	GC02P218125	6.67861	https://www.genecards.org/cgi-bin/carddisp.pl?gene=CXCR2
Ulcerative colitis	SELP	Selectin P	Protein Coding	52	GC01M169558	6.6763	https://www.genecards.org/cgi-bin/carddisp.pl?gene=SELP
Ulcerative colitis	ACSM3	Acyl-CoA Synthetase Medium Chain Family Member 3	Protein Coding	46	GC16P020610	6.67586	https://www.genecards.org/cgi-bin/carddisp.pl?gene=ACSM3
Ulcerative colitis	EPX	Eosinophil Peroxidase	Protein Coding	50	GC17P058192	6.66751	https://www.genecards.org/cgi-bin/carddisp.pl?gene=EPX
Ulcerative colitis	GCG	Glucagon	Protein Coding	48	GC02M162142	6.66509	https://www.genecards.org/cgi-bin/carddisp.pl?gene=GCG
Ulcerative colitis	CD36	CD36 Molecule	Protein Coding	56	GC07P080369	6.65681	https://www.genecards.org/cgi-bin/carddisp.pl?gene=CD36
Ulcerative colitis	ITGAX	Integrin Subunit Alpha X	Protein Coding	53	GC16P042860	6.63312	https://www.genecards.org/cgi-bin/carddisp.pl?gene=ITGAX
Ulcerative colitis	MUTYH	MutY DNA Glycosylase	Protein Coding	52	GC01M045329	6.63188	https://www.genecards.org/cgi-bin/carddisp.pl?gene=MUTYH
Ulcerative colitis	ITGAL	Integrin Subunit Alpha L	Protein Coding	53	GC16P030472	6.62761	https://www.genecards.org/cgi-bin/carddisp.pl?gene=ITGAL
Ulcerative colitis	ODC1	Ornithine Decarboxylase 1	Protein Coding	55	GC02M010432	6.62553	https://www.genecards.org/cgi-bin/carddisp.pl?gene=ODC1
Ulcerative colitis	DNMT1	DNA Methyltransferase 1	Protein Coding	59	GC19M010133	6.60582	https://www.genecards.org/cgi-bin/carddisp.pl?gene=DNMT1
Ulcerative colitis	TAP1	Transporter 1, ATP Binding Cassette Subfamily B Member	Protein Coding	55	GC06M071788	6.60509	https://www.genecards.org/cgi-bin/carddisp.pl?gene=TAP1
Ulcerative colitis	FN1	Fibronectin 1	Protein Coding	57	GC02M215360	6.5892	https://www.genecards.org/cgi-bin/carddisp.pl?gene=FN1
Ulcerative colitis	VIP	Vasoactive Intestinal Peptide	Protein Coding	51	GC06P152750	6.53255	https://www.genecards.org/cgi-bin/carddisp.pl?gene=VIP
Ulcerative colitis	RNF186	Ring Finger Protein 186	Protein Coding	38	GC01M019814	6.52819	https://www.genecards.org/cgi-bin/carddisp.pl?gene=RNF186
Ulcerative colitis	CD27	CD27 Molecule	Protein Coding	54	GC12P023523	6.46859	https://www.genecards.org/cgi-bin/carddisp.pl?gene=CD27
Ulcerative colitis	IL18RAP	Interleukin 18 Receptor Accessory Protein	Protein Coding	46	GC02P102418	6.45611	https://www.genecards.org/cgi-bin/carddisp.pl?gene=IL18RAP
Ulcerative colitis	MIR203A	MicroRNA 203a	RNA Gene	23	GC14P110640	6.45058	https://www.genecards.org/cgi-bin/carddisp.pl?gene=MIR203A
Ulcerative colitis	KRT20	Keratin 20	Protein Coding	46	GC17M040875	6.42608	https://www.genecards.org/cgi-bin/carddisp.pl?gene=KRT20
Ulcerative colitis	IL19	Interleukin 19	Protein Coding	47	GC01P206770	6.41812	https://www.genecards.org/cgi-bin/carddisp.pl?gene=IL19
Ulcerative colitis	MIR100	MicroRNA 100	RNA Gene	24	GC11M122152	6.41442	https://www.genecards.org/cgi-bin/carddisp.pl?gene=MIR100
Ulcerative colitis	NRAS	NRAS Proto-Oncogene, GTPase	Protein Coding	57	GC01M114704	6.4082	https://www.genecards.org/cgi-bin/carddisp.pl?gene=NRAS
Ulcerative colitis	TBX21	T-Box Transcription Factor 21	Protein Coding	52	GC17P047733	6.3988	https://www.genecards.org/cgi-bin/carddisp.pl?gene=TBX21
Ulcerative colitis	PDGFRA	Platelet Derived Growth Factor Receptor Alpha	Protein Coding	60	GC04P054229	6.39186	https://www.genecards.org/cgi-bin/carddisp.pl?gene=PDGFRA
Ulcerative colitis	PDGFRL	Platelet Derived Growth Factor Receptor Like	Protein Coding	50	GC08P017576	6.3669	https://www.genecards.org/cgi-bin/carddisp.pl?gene=PDGFRL
Ulcerative colitis	HLA-DPB1	Major Histocompatibility Complex, Class II, DP Beta 1	Protein Coding	51	GC06P092189	6.36223	https://www.genecards.org/cgi-bin/carddisp.pl?gene=HLA-DPB1
Ulcerative colitis	TET2	Tet Methylcytosine Dioxygenase 2	Protein Coding	52	GC04P105145	6.35643	https://www.genecards.org/cgi-bin/carddisp.pl?gene=TET2
Ulcerative colitis	GSDMB	Gasdermin B	Protein Coding	40	GC17M039904	6.34865	https://www.genecards.org/cgi-bin/carddisp.pl?gene=GSDMB
Ulcerative colitis	FOXC2	Forkhead Box C2	Protein Coding	49	GC16P086593	6.34436	https://www.genecards.org/cgi-bin/carddisp.pl?gene=FOXC2
Ulcerative colitis	IL33	Interleukin 33	Protein Coding	46	GC09P007685	6.34374	https://www.genecards.org/cgi-bin/carddisp.pl?gene=IL33
Ulcerative colitis	MIR451A	MicroRNA 451a	RNA Gene	19	GC17M028861	6.32521	https://www.genecards.org/cgi-bin/carddisp.pl?gene=MIR451A
Ulcerative colitis	DCLRE1C	DNA Cross-Link Repair 1C	Protein Coding	51	GC10M014897	6.32088	https://www.genecards.org/cgi-bin/carddisp.pl?gene=DCLRE1C
Ulcerative colitis	TEK	TEK Receptor Tyrosine Kinase	Protein Coding	58	GC09P027109	6.31276	https://www.genecards.org/cgi-bin/carddisp.pl?gene=TEK
Ulcerative colitis	TTC7A	Tetratricopeptide Repeat Domain 7A	Protein Coding	45	GC02P046906	6.30391	https://www.genecards.org/cgi-bin/carddisp.pl?gene=TTC7A
Ulcerative colitis	CYP3A5	Cytochrome P450 Family 3 Subfamily A Member 5	Protein Coding	51	GC07M099648	6.30216	https://www.genecards.org/cgi-bin/carddisp.pl?gene=CYP3A5
Ulcerative colitis	BRCA1	BRCA1 DNA Repair Associated	Protein Coding	56	GC17M043044	6.2948	https://www.genecards.org/cgi-bin/carddisp.pl?gene=BRCA1
Ulcerative colitis	PUS10	Pseudouridine Synthase 10	Protein Coding	43	GC02M060940	6.28641	https://www.genecards.org/cgi-bin/carddisp.pl?gene=PUS10
Ulcerative colitis	PRF1	Perforin 1	Protein Coding	53	GC10M070597	6.2845	https://www.genecards.org/cgi-bin/carddisp.pl?gene=PRF1
Ulcerative colitis	LGALS1	Galectin 1	Protein Coding	50	GC22P037675	6.27368	https://www.genecards.org/cgi-bin/carddisp.pl?gene=LGALS1
Ulcerative colitis	HIF1A	Hypoxia Inducible Factor 1 Subunit Alpha	Protein Coding	54	GC14P061695	6.26805	https://www.genecards.org/cgi-bin/carddisp.pl?gene=HIF1A
Ulcerative colitis	CCN2	Cellular Communication Network Factor 2	Protein Coding	53	GC06M131948	6.2649	https://www.genecards.org/cgi-bin/carddisp.pl?gene=CCN2
Ulcerative colitis	CSF1	Colony Stimulating Factor 1	Protein Coding	51	GC01P109911	6.25854	https://www.genecards.org/cgi-bin/carddisp.pl?gene=CSF1
Ulcerative colitis	IBD8	Inflammatory Bowel Disease 8	Genetic Locus	3	GC16U990238	6.25232	https://www.genecards.org/cgi-bin/carddisp.pl?gene=IBD8
Ulcerative colitis	HMGB1	High Mobility Group Box 1	Protein Coding	54	GC13M030456	6.19289	https://www.genecards.org/cgi-bin/carddisp.pl?gene=HMGB1
Ulcerative colitis	CD86	CD86 Molecule	Protein Coding	51	GC03P122055	6.16896	https://www.genecards.org/cgi-bin/carddisp.pl?gene=CD86
Ulcerative colitis	OTUD3	OTU Deubiquitinase 3	Protein Coding	39	GC01P019881	6.16822	https://www.genecards.org/cgi-bin/carddisp.pl?gene=OTUD3
Ulcerative colitis	MUC6	Mucin 6, Oligomeric Mucus/Gel-Forming	Protein Coding	46	GC11M001012	6.16346	https://www.genecards.org/cgi-bin/carddisp.pl?gene=MUC6
Ulcerative colitis	FCGR3B	Fc Gamma Receptor IIIb	Protein Coding	50	GC01M161623	6.13936	https://www.genecards.org/cgi-bin/carddisp.pl?gene=FCGR3B
Ulcerative colitis	INS-IGF2	INS-IGF2 Readthrough	Protein Coding	31	GC11M004508	6.13867	https://www.genecards.org/cgi-bin/carddisp.pl?gene=INS-IGF2
Ulcerative colitis	MIR34C	MicroRNA 34c	RNA Gene	24	GC11P111985	6.12449	https://www.genecards.org/cgi-bin/carddisp.pl?gene=MIR34C
Ulcerative colitis	IL27	Interleukin 27	Protein Coding	44	GC16M038243	6.12186	https://www.genecards.org/cgi-bin/carddisp.pl?gene=IL27
Ulcerative colitis	CDH3	Cadherin 3	Protein Coding	54	GC16P068637	6.12177	https://www.genecards.org/cgi-bin/carddisp.pl?gene=CDH3
Ulcerative colitis	STING1	Stimulator Of Interferon Response CGAMP Interactor 1	Protein Coding	48	GC05M139476	6.10505	https://www.genecards.org/cgi-bin/carddisp.pl?gene=STING1
Ulcerative colitis	AGER	Advanced Glycosylation End-Product Specific Receptor	Protein Coding	53	GC06M032180	6.07694	https://www.genecards.org/cgi-bin/carddisp.pl?gene=AGER
Ulcerative colitis	ECM1	Extracellular Matrix Protein 1	Protein Coding	51	GC01P150508	6.06525	https://www.genecards.org/cgi-bin/carddisp.pl?gene=ECM1
Ulcerative colitis	RFX5	Regulatory Factor X5	Protein Coding	50	GC01M151340	6.06279	https://www.genecards.org/cgi-bin/carddisp.pl?gene=RFX5
Ulcerative colitis	SKIC2	SKI2 Subunit Of Superkiller Complex	Protein Coding	48	GC06P095839	6.05557	https://www.genecards.org/cgi-bin/carddisp.pl?gene=SKIC2
Ulcerative colitis	IKZF1	IKAROS Family Zinc Finger 1	Protein Coding	56	GC07P050303	6.02873	https://www.genecards.org/cgi-bin/carddisp.pl?gene=IKZF1
Ulcerative colitis	NOS3	Nitric Oxide Synthase 3	Protein Coding	56	GC07P150990	6.02842	https://www.genecards.org/cgi-bin/carddisp.pl?gene=NOS3
Ulcerative colitis	HRAS	HRas Proto-Oncogene, GTPase	Protein Coding	59	GC11M004421	6.01749	https://www.genecards.org/cgi-bin/carddisp.pl?gene=HRAS
Ulcerative colitis	CD274	CD274 Molecule	Protein Coding	52	GC09P005450	6.01105	https://www.genecards.org/cgi-bin/carddisp.pl?gene=CD274
Ulcerative colitis	AXIN2	Axin 2	Protein Coding	55	GC17M065528	5.98729	https://www.genecards.org/cgi-bin/carddisp.pl?gene=AXIN2
Ulcerative colitis	SELL	Selectin L	Protein Coding	50	GC01M169690	5.97283	https://www.genecards.org/cgi-bin/carddisp.pl?gene=SELL
Ulcerative colitis	CYBA	Cytochrome B-245 Alpha Chain	Protein Coding	54	GC16M088643	5.97058	https://www.genecards.org/cgi-bin/carddisp.pl?gene=CYBA
Ulcerative colitis	FNDC4	Fibronectin Type III Domain Containing 4	Protein Coding	42	GC02M027491	5.96223	https://www.genecards.org/cgi-bin/carddisp.pl?gene=FNDC4
Ulcerative colitis	NLRP12	NLR Family Pyrin Domain Containing 12	Protein Coding	51	GC19M053793	5.96098	https://www.genecards.org/cgi-bin/carddisp.pl?gene=NLRP12
Ulcerative colitis	LEP	Leptin	Protein Coding	53	GC07P128241	5.95872	https://www.genecards.org/cgi-bin/carddisp.pl?gene=LEP
Ulcerative colitis	ADAM17	ADAM Metallopeptidase Domain 17	Protein Coding	58	GC02M009488	5.95562	https://www.genecards.org/cgi-bin/carddisp.pl?gene=ADAM17
Ulcerative colitis	IBD7	Inflammatory Bowel Disease 7	Genetic Locus	3	GC01U990338	5.93071	https://www.genecards.org/cgi-bin/carddisp.pl?gene=IBD7
Ulcerative colitis	DCC	DCC Netrin 1 Receptor	Protein Coding	53	GC18P052340	5.92854	https://www.genecards.org/cgi-bin/carddisp.pl?gene=DCC
Ulcerative colitis	IL6R	Interleukin 6 Receptor	Protein Coding	57	GC01P154405	5.91735	https://www.genecards.org/cgi-bin/carddisp.pl?gene=IL6R
Ulcerative colitis	SRP54	Signal Recognition Particle 54	Protein Coding	50	GC14P034981	5.91446	https://www.genecards.org/cgi-bin/carddisp.pl?gene=SRP54
Ulcerative colitis	GPT	Glutamic--Pyruvic Transaminase	Protein Coding	48	GC08P144502	5.90495	https://www.genecards.org/cgi-bin/carddisp.pl?gene=GPT
Ulcerative colitis	MKI67	Marker Of Proliferation Ki-67	Protein Coding	51	GC10M128096	5.89992	https://www.genecards.org/cgi-bin/carddisp.pl?gene=MKI67
Ulcerative colitis	MIR31	MicroRNA 31	RNA Gene	22	GC09M021837	5.89466	https://www.genecards.org/cgi-bin/carddisp.pl?gene=MIR31
Ulcerative colitis	DEFB1	Defensin Beta 1	Protein Coding	46	GC08M006870	5.89424	https://www.genecards.org/cgi-bin/carddisp.pl?gene=DEFB1
Ulcerative colitis	HPGD	15-Hydroxyprostaglandin Dehydrogenase	Protein Coding	53	GC04M174490	5.88302	https://www.genecards.org/cgi-bin/carddisp.pl?gene=HPGD
Ulcerative colitis	LAMB1	Laminin Subunit Beta 1	Protein Coding	57	GC07M107923	5.87619	https://www.genecards.org/cgi-bin/carddisp.pl?gene=LAMB1
Ulcerative colitis	SLC9A3	Solute Carrier Family 9 Member A3	Protein Coding	54	GC05M000472	5.86977	https://www.genecards.org/cgi-bin/carddisp.pl?gene=SLC9A3
Ulcerative colitis	BGLAP	Bone Gamma-Carboxyglutamate Protein	Protein Coding	46	GC01P156242	5.86475	https://www.genecards.org/cgi-bin/carddisp.pl?gene=BGLAP
Ulcerative colitis	PTPN11	Protein Tyrosine Phosphatase Non-Receptor Type 11	Protein Coding	61	GC12P112418	5.85993	https://www.genecards.org/cgi-bin/carddisp.pl?gene=PTPN11
Ulcerative colitis	F13A1	Coagulation Factor XIII A Chain	Protein Coding	53	GC06M006144	5.85584	https://www.genecards.org/cgi-bin/carddisp.pl?gene=F13A1
Ulcerative colitis	EDN1	Endothelin 1	Protein Coding	55	GC06P012256	5.85277	https://www.genecards.org/cgi-bin/carddisp.pl?gene=EDN1
Ulcerative colitis	ATRIP	ATR Interacting Protein	Protein Coding	49	GC03P049971	5.84684	https://www.genecards.org/cgi-bin/carddisp.pl?gene=ATRIP
Ulcerative colitis	GBA1	Glucosylceramidase Beta 1	Protein Coding	55	GC01M155375	5.83886	https://www.genecards.org/cgi-bin/carddisp.pl?gene=GBA1
Ulcerative colitis	ELP1	Elongator Acetyltransferase Complex Subunit 1	Protein Coding	51	GC09M108868	5.83627	https://www.genecards.org/cgi-bin/carddisp.pl?gene=ELP1
Ulcerative colitis	WIPF1	WAS/WASL Interacting Protein Family Member 1	Protein Coding	50	GC02M174559	5.82131	https://www.genecards.org/cgi-bin/carddisp.pl?gene=WIPF1
Ulcerative colitis	MIR155	MicroRNA 155	RNA Gene	23	GC21P025573	5.81076	https://www.genecards.org/cgi-bin/carddisp.pl?gene=MIR155
Ulcerative colitis	MIR142	MicroRNA 142	RNA Gene	24	GC17M058331	5.80866	https://www.genecards.org/cgi-bin/carddisp.pl?gene=MIR142
Ulcerative colitis	LMNA	Lamin A/C	Protein Coding	56	GC01P156082	5.80045	https://www.genecards.org/cgi-bin/carddisp.pl?gene=LMNA
Ulcerative colitis	NFKBIA	NFKB Inhibitor Alpha	Protein Coding	57	GC14M035401	5.79374	https://www.genecards.org/cgi-bin/carddisp.pl?gene=NFKBIA
Ulcerative colitis	MIRLET7A1	MicroRNA Let-7a-1	RNA Gene	23	GC09P094175	5.78991	https://www.genecards.org/cgi-bin/carddisp.pl?gene=MIRLET7A1
Ulcerative colitis	FABP2	Fatty Acid Binding Protein 2	Protein Coding	48	GC04M119317	5.77343	https://www.genecards.org/cgi-bin/carddisp.pl?gene=FABP2
Ulcerative colitis	AOC1	Amine Oxidase Copper Containing 1	Protein Coding	49	GC07P150824	5.76867	https://www.genecards.org/cgi-bin/carddisp.pl?gene=AOC1
Ulcerative colitis	POMC	Proopiomelanocortin	Protein Coding	55	GC02M025160	5.76149	https://www.genecards.org/cgi-bin/carddisp.pl?gene=POMC
Ulcerative colitis	ITGAE	Integrin Subunit Alpha E	Protein Coding	47	GC17M006905	5.75504	https://www.genecards.org/cgi-bin/carddisp.pl?gene=ITGAE
Ulcerative colitis	MMP7	Matrix Metallopeptidase 7	Protein Coding	53	GC11M102425	5.74915	https://www.genecards.org/cgi-bin/carddisp.pl?gene=MMP7
Ulcerative colitis	IFNA2	Interferon Alpha 2	Protein Coding	50	GC09M021384	5.7258	https://www.genecards.org/cgi-bin/carddisp.pl?gene=IFNA2
Ulcerative colitis	MYC	MYC Proto-Oncogene, BHLH Transcription Factor	Protein Coding	59	GC08P127735	5.72489	https://www.genecards.org/cgi-bin/carddisp.pl?gene=MYC
Ulcerative colitis	ERCC6	ERCC Excision Repair 6, Chromatin Remodeling Factor	Protein Coding	52	GC10M049454	5.72441	https://www.genecards.org/cgi-bin/carddisp.pl?gene=ERCC6
Ulcerative colitis	IL17RA	Interleukin 17 Receptor A	Protein Coding	53	GC22P044251	5.72336	https://www.genecards.org/cgi-bin/carddisp.pl?gene=IL17RA
Ulcerative colitis	HLA-DRB9	Major Histocompatibility Complex, Class II, DR Beta 9 (Pseudogene)	Pseudogene	14	GC06M071767	5.72152	https://www.genecards.org/cgi-bin/carddisp.pl?gene=HLA-DRB9
Ulcerative colitis	NR1H4	Nuclear Receptor Subfamily 1 Group H Member 4	Protein Coding	55	GC12P100473	5.72061	https://www.genecards.org/cgi-bin/carddisp.pl?gene=NR1H4
Ulcerative colitis	MIR127	MicroRNA 127	RNA Gene	23	GC14P110568	5.71547	https://www.genecards.org/cgi-bin/carddisp.pl?gene=MIR127
Ulcerative colitis	MIR342	MicroRNA 342	RNA Gene	22	GC14P100109	5.71547	https://www.genecards.org/cgi-bin/carddisp.pl?gene=MIR342
Ulcerative colitis	GALNT12	Polypeptide N-Acetylgalactosaminyltransferase 12	Protein Coding	47	GC09P098807	5.71083	https://www.genecards.org/cgi-bin/carddisp.pl?gene=GALNT12
Ulcerative colitis	MIR125A	MicroRNA 125a	RNA Gene	23	GC19P073357	5.69796	https://www.genecards.org/cgi-bin/carddisp.pl?gene=MIR125A
Ulcerative colitis	PLAU	Plasminogen Activator, Urokinase	Protein Coding	59	GC10P073909	5.68078	https://www.genecards.org/cgi-bin/carddisp.pl?gene=PLAU
Ulcerative colitis	NOTCH1	Notch Receptor 1	Protein Coding	60	GC09M137729	5.68027	https://www.genecards.org/cgi-bin/carddisp.pl?gene=NOTCH1
Ulcerative colitis	ITGB4	Integrin Subunit Beta 4	Protein Coding	56	GC17P075721	5.67889	https://www.genecards.org/cgi-bin/carddisp.pl?gene=ITGB4
Ulcerative colitis	SOD2	Superoxide Dismutase 2	Protein Coding	53	GC06M159669	5.67431	https://www.genecards.org/cgi-bin/carddisp.pl?gene=SOD2
Ulcerative colitis	HSPD1	Heat Shock Protein Family D (Hsp60) Member 1	Protein Coding	55	GC02M197486	5.66372	https://www.genecards.org/cgi-bin/carddisp.pl?gene=HSPD1
Ulcerative colitis	IFIH1	Interferon Induced With Helicase C Domain 1	Protein Coding	55	GC02M162267	5.66203	https://www.genecards.org/cgi-bin/carddisp.pl?gene=IFIH1
Ulcerative colitis	ABCG2	ATP Binding Cassette Subfamily G Member 2 (Junior Blood Group)	Protein Coding	56	GC04M088090	5.6605	https://www.genecards.org/cgi-bin/carddisp.pl?gene=ABCG2
Ulcerative colitis	PLA2G2E	Phospholipase A2 Group IIE	Protein Coding	43	GC01M019920	5.65519	https://www.genecards.org/cgi-bin/carddisp.pl?gene=PLA2G2E
Ulcerative colitis	CEP43	Centrosomal Protein 43	Protein Coding	45	GC06P167001	5.65246	https://www.genecards.org/cgi-bin/carddisp.pl?gene=CEP43
Ulcerative colitis	MIR193A	MicroRNA 193a	RNA Gene	22	GC17P031559	5.62664	https://www.genecards.org/cgi-bin/carddisp.pl?gene=MIR193A
Ulcerative colitis	FBXW7	F-Box And WD Repeat Domain Containing 7	Protein Coding	51	GC04M152321	5.62475	https://www.genecards.org/cgi-bin/carddisp.pl?gene=FBXW7
Ulcerative colitis	PTPN12	Protein Tyrosine Phosphatase Non-Receptor Type 12	Protein Coding	55	GC07P077537	5.62394	https://www.genecards.org/cgi-bin/carddisp.pl?gene=PTPN12
Ulcerative colitis	MUC3A	Mucin 3A, Cell Surface Associated	Protein Coding	40	GC07P100949	5.61456	https://www.genecards.org/cgi-bin/carddisp.pl?gene=MUC3A
Ulcerative colitis	RAC1	Rac Family Small GTPase 1	Protein Coding	55	GC07P006377	5.59989	https://www.genecards.org/cgi-bin/carddisp.pl?gene=RAC1
Ulcerative colitis	RBFOX1	RNA Binding Fox-1 Homolog 1	Protein Coding	46	GC16P013626	5.59581	https://www.genecards.org/cgi-bin/carddisp.pl?gene=RBFOX1
Ulcerative colitis	IBD6	Inflammatory Bowel Disease 6	Genetic Locus	3	GC19U990206	5.59581	https://www.genecards.org/cgi-bin/carddisp.pl?gene=IBD6
Ulcerative colitis	HSPA2	Heat Shock Protein Family A (Hsp70) Member 2	Protein Coding	51	GC14P064535	5.59493	https://www.genecards.org/cgi-bin/carddisp.pl?gene=HSPA2
Ulcerative colitis	KRT1	Keratin 1	Protein Coding	53	GC12M052674	5.58999	https://www.genecards.org/cgi-bin/carddisp.pl?gene=KRT1
Ulcerative colitis	BRIP1	BRCA1 Interacting Helicase 1	Protein Coding	54	GC17M061679	5.58912	https://www.genecards.org/cgi-bin/carddisp.pl?gene=BRIP1
Ulcerative colitis	TNFRSF6B	TNF Receptor Superfamily Member 6b	Protein Coding	48	GC20P063696	5.58288	https://www.genecards.org/cgi-bin/carddisp.pl?gene=TNFRSF6B
Ulcerative colitis	BIRC5	Baculoviral IAP Repeat Containing 5	Protein Coding	52	GC17P078214	5.55622	https://www.genecards.org/cgi-bin/carddisp.pl?gene=BIRC5
Ulcerative colitis	SERPINA1	Serpin Family A Member 1	Protein Coding	56	GC14M094376	5.55001	https://www.genecards.org/cgi-bin/carddisp.pl?gene=SERPINA1
Ulcerative colitis	PTGES	Prostaglandin E Synthase	Protein Coding	48	GC09M129738	5.54349	https://www.genecards.org/cgi-bin/carddisp.pl?gene=PTGES
Ulcerative colitis	MMP13	Matrix Metallopeptidase 13	Protein Coding	57	GC11M102942	5.54226	https://www.genecards.org/cgi-bin/carddisp.pl?gene=MMP13
Ulcerative colitis	UNC13D	Unc-13 Homolog D	Protein Coding	51	GC17M075827	5.53644	https://www.genecards.org/cgi-bin/carddisp.pl?gene=UNC13D
Ulcerative colitis	ESR1	Estrogen Receptor 1	Protein Coding	61	GC06P151656	5.5234	https://www.genecards.org/cgi-bin/carddisp.pl?gene=ESR1
Ulcerative colitis	WDR1	WD Repeat Domain 1	Protein Coding	46	GC04M010073	5.51986	https://www.genecards.org/cgi-bin/carddisp.pl?gene=WDR1
Ulcerative colitis	PMS1	PMS1 Homolog 1, Mismatch Repair System Component	Protein Coding	48	GC02P189784	5.51211	https://www.genecards.org/cgi-bin/carddisp.pl?gene=PMS1
Ulcerative colitis	LGR5	Leucine Rich Repeat Containing G Protein-Coupled Receptor 5	Protein Coding	51	GC12P071439	5.48901	https://www.genecards.org/cgi-bin/carddisp.pl?gene=LGR5
Ulcerative colitis	CCNY	Cyclin Y	Protein Coding	44	GC10P035254	5.48143	https://www.genecards.org/cgi-bin/carddisp.pl?gene=CCNY
Ulcerative colitis	IL3	Interleukin 3	Protein Coding	52	GC05P132060	5.47914	https://www.genecards.org/cgi-bin/carddisp.pl?gene=IL3
Ulcerative colitis	SOX9	SRY-Box Transcription Factor 9	Protein Coding	52	GC17P072121	5.45844	https://www.genecards.org/cgi-bin/carddisp.pl?gene=SOX9
Ulcerative colitis	MIR146A	MicroRNA 146a	RNA Gene	25	GC05P160485	5.44047	https://www.genecards.org/cgi-bin/carddisp.pl?gene=MIR146A
Ulcerative colitis	IDO1	Indoleamine 2,3-Dioxygenase 1	Protein Coding	53	GC08P039891	5.43626	https://www.genecards.org/cgi-bin/carddisp.pl?gene=IDO1
Ulcerative colitis	CDC42	Cell Division Cycle 42	Protein Coding	57	GC01P022052	5.41339	https://www.genecards.org/cgi-bin/carddisp.pl?gene=CDC42
Ulcerative colitis	TMEM201	Transmembrane Protein 201	Protein Coding	39	GC01P009588	5.38486	https://www.genecards.org/cgi-bin/carddisp.pl?gene=TMEM201
Ulcerative colitis	GZMB	Granzyme B	Protein Coding	54	GC14M024630	5.37087	https://www.genecards.org/cgi-bin/carddisp.pl?gene=GZMB
Ulcerative colitis	TNFRSF25	TNF Receptor Superfamily Member 25	Protein Coding	50	GC01M006460	5.36105	https://www.genecards.org/cgi-bin/carddisp.pl?gene=TNFRSF25
Ulcerative colitis	CRHR2	Corticotropin Releasing Hormone Receptor 2	Protein Coding	50	GC07M030651	5.34346	https://www.genecards.org/cgi-bin/carddisp.pl?gene=CRHR2
Ulcerative colitis	PIK3CG	Phosphatidylinositol-4,5-Bisphosphate 3-Kinase Catalytic Subunit Gamma	Protein Coding	55	GC07P106865	5.32972	https://www.genecards.org/cgi-bin/carddisp.pl?gene=PIK3CG
Ulcerative colitis	HLA-E	Major Histocompatibility Complex, Class I, E	Protein Coding	48	GC06P092129	5.30477	https://www.genecards.org/cgi-bin/carddisp.pl?gene=HLA-E
Ulcerative colitis	MMP8	Matrix Metallopeptidase 8	Protein Coding	55	GC11M102712	5.30363	https://www.genecards.org/cgi-bin/carddisp.pl?gene=MMP8
Ulcerative colitis	PTH	Parathyroid Hormone	Protein Coding	52	GC11M013492	5.29067	https://www.genecards.org/cgi-bin/carddisp.pl?gene=PTH
Ulcerative colitis	CYP1A1	Cytochrome P450 Family 1 Subfamily A Member 1	Protein Coding	55	GC15M074719	5.28903	https://www.genecards.org/cgi-bin/carddisp.pl?gene=CYP1A1
Ulcerative colitis	IRF8	Interferon Regulatory Factor 8	Protein Coding	52	GC16P085898	5.28467	https://www.genecards.org/cgi-bin/carddisp.pl?gene=IRF8
Ulcerative colitis	STX11	Syntaxin 11	Protein Coding	47	GC06P144196	5.27796	https://www.genecards.org/cgi-bin/carddisp.pl?gene=STX11
Ulcerative colitis	GSTT1	Glutathione S-Transferase Theta 1	Protein Coding	38	GC22Mi00270	5.27508	https://www.genecards.org/cgi-bin/carddisp.pl?gene=GSTT1
Ulcerative colitis	CAV1	Caveolin 1	Protein Coding	55	GC07P116524	5.27455	https://www.genecards.org/cgi-bin/carddisp.pl?gene=CAV1
Ulcerative colitis	TYMS	Thymidylate Synthetase	Protein Coding	56	GC18P000657	5.25593	https://www.genecards.org/cgi-bin/carddisp.pl?gene=TYMS
Ulcerative colitis	CD44	CD44 Molecule (Indian Blood Group)	Protein Coding	55	GC11P035139	5.25169	https://www.genecards.org/cgi-bin/carddisp.pl?gene=CD44
Ulcerative colitis	DOCK8	Dedicator Of Cytokinesis 8	Protein Coding	52	GC09P000214	5.24616	https://www.genecards.org/cgi-bin/carddisp.pl?gene=DOCK8
Ulcerative colitis	ACADS	Acyl-CoA Dehydrogenase Short Chain	Protein Coding	52	GC12P126959	5.24315	https://www.genecards.org/cgi-bin/carddisp.pl?gene=ACADS
Ulcerative colitis	MCL1	MCL1 Apoptosis Regulator, BCL2 Family Member	Protein Coding	55	GC01M152731	5.23917	https://www.genecards.org/cgi-bin/carddisp.pl?gene=MCL1
Ulcerative colitis	GPX1	Glutathione Peroxidase 1	Protein Coding	52	GC03M051566	5.21244	https://www.genecards.org/cgi-bin/carddisp.pl?gene=GPX1
Ulcerative colitis	CDKAL1	CDK5 Regulatory Subunit Associated Protein 1 Like 1	Protein Coding	46	GC06P020534	5.2032	https://www.genecards.org/cgi-bin/carddisp.pl?gene=CDKAL1
Ulcerative colitis	IRF1	Interferon Regulatory Factor 1	Protein Coding	53	GC05M132440	5.19096	https://www.genecards.org/cgi-bin/carddisp.pl?gene=IRF1
Ulcerative colitis	DMD	Dystrophin	Protein Coding	52	GC0XM031097	5.19058	https://www.genecards.org/cgi-bin/carddisp.pl?gene=DMD
Ulcerative colitis	BUB1	BUB1 Mitotic Checkpoint Serine/Threonine Kinase	Protein Coding	56	GC02M110637	5.17688	https://www.genecards.org/cgi-bin/carddisp.pl?gene=BUB1
Ulcerative colitis	TCERG1	Transcription Elongation Regulator 1	Protein Coding	46	GC05P146447	5.17688	https://www.genecards.org/cgi-bin/carddisp.pl?gene=TCERG1
Ulcerative colitis	MIR34B	MicroRNA 34b	RNA Gene	23	GC11P111982	5.17688	https://www.genecards.org/cgi-bin/carddisp.pl?gene=MIR34B
Ulcerative colitis	IKBKG	Inhibitor Of Nuclear Factor Kappa B Kinase Regulatory Subunit Gamma	Protein Coding	55	GC0XP154541	5.16824	https://www.genecards.org/cgi-bin/carddisp.pl?gene=IKBKG
Ulcerative colitis	RHOA	Ras Homolog Family Member A	Protein Coding	57	GC03M049359	5.16492	https://www.genecards.org/cgi-bin/carddisp.pl?gene=RHOA
Ulcerative colitis	ICAM3	Intercellular Adhesion Molecule 3	Protein Coding	50	GC19M010421	5.14286	https://www.genecards.org/cgi-bin/carddisp.pl?gene=ICAM3
Ulcerative colitis	CASP3	Caspase 3	Protein Coding	57	GC04M184627	5.13087	https://www.genecards.org/cgi-bin/carddisp.pl?gene=CASP3
Ulcerative colitis	IL4R	Interleukin 4 Receptor	Protein Coding	55	GC16P042490	5.12954	https://www.genecards.org/cgi-bin/carddisp.pl?gene=IL4R
Ulcerative colitis	NR3C1	Nuclear Receptor Subfamily 3 Group C Member 1	Protein Coding	56	GC05M143277	5.12616	https://www.genecards.org/cgi-bin/carddisp.pl?gene=NR3C1
Ulcerative colitis	HLA-G	Major Histocompatibility Complex, Class I, G	Protein Coding	50	GC06P092102	5.12501	https://www.genecards.org/cgi-bin/carddisp.pl?gene=HLA-G
Ulcerative colitis	ORMDL3	ORMDL Sphingolipid Biosynthesis Regulator 3	Protein Coding	45	GC17M039921	5.11934	https://www.genecards.org/cgi-bin/carddisp.pl?gene=ORMDL3
Ulcerative colitis	TGM2	Transglutaminase 2	Protein Coding	54	GC20M038127	5.11411	https://www.genecards.org/cgi-bin/carddisp.pl?gene=TGM2
Ulcerative colitis	JAK3	Janus Kinase 3	Protein Coding	58	GC19M017824	5.11265	https://www.genecards.org/cgi-bin/carddisp.pl?gene=JAK3
Ulcerative colitis	PLEC	Plectin	Protein Coding	50	GC08M144275	5.10089	https://www.genecards.org/cgi-bin/carddisp.pl?gene=PLEC
Ulcerative colitis	IBD4	Inflammatory Bowel Disease 4	Genetic Locus	3	GC14U990396	5.09523	https://www.genecards.org/cgi-bin/carddisp.pl?gene=IBD4
Ulcerative colitis	IBD9	Inflammatory Bowel Disease 9	Genetic Locus	3	GC03U900016	5.09523	https://www.genecards.org/cgi-bin/carddisp.pl?gene=IBD9
Ulcerative colitis	ARPC2	Actin Related Protein 2/3 Complex Subunit 2	Protein Coding	50	GC02P218217	5.07962	https://www.genecards.org/cgi-bin/carddisp.pl?gene=ARPC2
Ulcerative colitis	PIK3CD	Phosphatidylinositol-4,5-Bisphosphate 3-Kinase Catalytic Subunit Delta	Protein Coding	60	GC01P009628	5.07528	https://www.genecards.org/cgi-bin/carddisp.pl?gene=PIK3CD
Ulcerative colitis	CXCR3	C-X-C Motif Chemokine Receptor 3	Protein Coding	51	GC0XM071615	5.07446	https://www.genecards.org/cgi-bin/carddisp.pl?gene=CXCR3
Ulcerative colitis	TNIP1	TNFAIP3 Interacting Protein 1	Protein Coding	46	GC05M151029	5.07086	https://www.genecards.org/cgi-bin/carddisp.pl?gene=TNIP1
Ulcerative colitis	XRCC1	X-Ray Repair Cross Complementing 1	Protein Coding	51	GC19M043543	5.07005	https://www.genecards.org/cgi-bin/carddisp.pl?gene=XRCC1
Ulcerative colitis	INSL6	Insulin Like 6	Protein Coding	40	GC09M004991	5.06477	https://www.genecards.org/cgi-bin/carddisp.pl?gene=INSL6
Ulcerative colitis	MTR	5-Methyltetrahydrofolate-Homocysteine Methyltransferase	Protein Coding	54	GC01P236795	5.06323	https://www.genecards.org/cgi-bin/carddisp.pl?gene=MTR
Ulcerative colitis	MIR214	MicroRNA 214	RNA Gene	25	GC01M172234	5.04237	https://www.genecards.org/cgi-bin/carddisp.pl?gene=MIR214
Ulcerative colitis	COL1A1	Collagen Type I Alpha 1 Chain	Protein Coding	56	GC17M052191	5.03129	https://www.genecards.org/cgi-bin/carddisp.pl?gene=COL1A1
Ulcerative colitis	MIR24-1	MicroRNA 24-1	RNA Gene	21	GC09P095086	5.01146	https://www.genecards.org/cgi-bin/carddisp.pl?gene=MIR24-1
Ulcerative colitis	EPHB4	EPH Receptor B4	Protein Coding	60	GC07M102433	5.0039	https://www.genecards.org/cgi-bin/carddisp.pl?gene=EPHB4
Ulcerative colitis	HBEGF	Heparin Binding EGF Like Growth Factor	Protein Coding	50	GC05M140332	4.99797	https://www.genecards.org/cgi-bin/carddisp.pl?gene=HBEGF
Ulcerative colitis	MIR26A1	MicroRNA 26a-1	RNA Gene	23	GC03P037969	4.99704	https://www.genecards.org/cgi-bin/carddisp.pl?gene=MIR26A1
Ulcerative colitis	PI3	Peptidase Inhibitor 3	Protein Coding	44	GC20P045174	4.99277	https://www.genecards.org/cgi-bin/carddisp.pl?gene=PI3
Ulcerative colitis	NOTCH4	Notch Receptor 4	Protein Coding	53	GC06M071755	4.98147	https://www.genecards.org/cgi-bin/carddisp.pl?gene=NOTCH4
Ulcerative colitis	NQO1	NAD(P)H Quinone Dehydrogenase 1	Protein Coding	55	GC16M069706	4.9806	https://www.genecards.org/cgi-bin/carddisp.pl?gene=NQO1
Ulcerative colitis	PCNA	Proliferating Cell Nuclear Antigen	Protein Coding	57	GC20M005114	4.95536	https://www.genecards.org/cgi-bin/carddisp.pl?gene=PCNA
Ulcerative colitis	VIM	Vimentin	Protein Coding	57	GC10P017227	4.95512	https://www.genecards.org/cgi-bin/carddisp.pl?gene=VIM
Ulcerative colitis	BSN	Bassoon Presynaptic Cytomatrix Protein	Protein Coding	43	GC03P049554	4.95084	https://www.genecards.org/cgi-bin/carddisp.pl?gene=BSN
Ulcerative colitis	KIF21B	Kinesin Family Member 21B	Protein Coding	42	GC01M200938	4.95075	https://www.genecards.org/cgi-bin/carddisp.pl?gene=KIF21B
Ulcerative colitis	FCGR2B	Fc Gamma Receptor IIb	Protein Coding	56	GC01P161823	4.95021	https://www.genecards.org/cgi-bin/carddisp.pl?gene=FCGR2B
Ulcerative colitis	BCL2L1	BCL2 Like 1	Protein Coding	55	GC20M031664	4.93753	https://www.genecards.org/cgi-bin/carddisp.pl?gene=BCL2L1
Ulcerative colitis	CYBB	Cytochrome B-245 Beta Chain	Protein Coding	56	GC0XP037780	4.93615	https://www.genecards.org/cgi-bin/carddisp.pl?gene=CYBB
Ulcerative colitis	JUN	Jun Proto-Oncogene, AP-1 Transcription Factor Subunit	Protein Coding	55	GC01M058780	4.93146	https://www.genecards.org/cgi-bin/carddisp.pl?gene=JUN
Ulcerative colitis	ACTA2	Actin Alpha 2, Smooth Muscle	Protein Coding	53	GC10M088935	4.93085	https://www.genecards.org/cgi-bin/carddisp.pl?gene=ACTA2
Ulcerative colitis	CEACAM6	CEA Cell Adhesion Molecule 6	Protein Coding	48	GC19P041750	4.92697	https://www.genecards.org/cgi-bin/carddisp.pl?gene=CEACAM6
Ulcerative colitis	IL1R2	Interleukin 1 Receptor Type 2	Protein Coding	53	GC02P101991	4.92182	https://www.genecards.org/cgi-bin/carddisp.pl?gene=IL1R2
Ulcerative colitis	LBR	Lamin B Receptor	Protein Coding	54	GC01M225401	4.92094	https://www.genecards.org/cgi-bin/carddisp.pl?gene=LBR
Ulcerative colitis	SMAD2	SMAD Family Member 2	Protein Coding	59	GC18M047809	4.92024	https://www.genecards.org/cgi-bin/carddisp.pl?gene=SMAD2
Ulcerative colitis	IGF1R	Insulin Like Growth Factor 1 Receptor	Protein Coding	61	GC15P098648	4.90693	https://www.genecards.org/cgi-bin/carddisp.pl?gene=IGF1R
Ulcerative colitis	KNG1	Kininogen 1	Protein Coding	55	GC03P186717	4.90497	https://www.genecards.org/cgi-bin/carddisp.pl?gene=KNG1
Ulcerative colitis	BUB1B	BUB1 Mitotic Checkpoint Serine/Threonine Kinase B	Protein Coding	56	GC15P040161	4.89908	https://www.genecards.org/cgi-bin/carddisp.pl?gene=BUB1B
Ulcerative colitis	PTPRJ	Protein Tyrosine Phosphatase Receptor Type J	Protein Coding	55	GC11P048002	4.89908	https://www.genecards.org/cgi-bin/carddisp.pl?gene=PTPRJ
Ulcerative colitis	DLC1	DLC1 Rho GTPase Activating Protein	Protein Coding	51	GC08M013083	4.89908	https://www.genecards.org/cgi-bin/carddisp.pl?gene=DLC1
Ulcerative colitis	FZD3	Frizzled Class Receptor 3	Protein Coding	50	GC08P028494	4.89908	https://www.genecards.org/cgi-bin/carddisp.pl?gene=FZD3
Ulcerative colitis	RAD54B	RAD54 Homolog B	Protein Coding	49	GC08M094371	4.89908	https://www.genecards.org/cgi-bin/carddisp.pl?gene=RAD54B
Ulcerative colitis	FLCN	Folliculin	Protein Coding	48	GC17M017212	4.89908	https://www.genecards.org/cgi-bin/carddisp.pl?gene=FLCN
Ulcerative colitis	MCC	MCC Regulator Of WNT Signaling Pathway	Protein Coding	47	GC05M113022	4.89908	https://www.genecards.org/cgi-bin/carddisp.pl?gene=MCC
Ulcerative colitis	SLC9A9	Solute Carrier Family 9 Member A9	Protein Coding	46	GC03M143265	4.89908	https://www.genecards.org/cgi-bin/carddisp.pl?gene=SLC9A9
Ulcerative colitis	PKHD1	PKHD1 Ciliary IPT Domain Containing Fibrocystin/Polyductin	Protein Coding	45	GC06M072064	4.89908	https://www.genecards.org/cgi-bin/carddisp.pl?gene=PKHD1
Ulcerative colitis	AMER1	APC Membrane Recruitment Protein 1	Protein Coding	43	GC0XM064185	4.89908	https://www.genecards.org/cgi-bin/carddisp.pl?gene=AMER1
Ulcerative colitis	C11orf65	Chromosome 11 Open Reading Frame 65	Protein Coding	36	GC11M108308	4.89908	https://www.genecards.org/cgi-bin/carddisp.pl?gene=C11orf65
Ulcerative colitis	MT-ND1	Mitochondrially Encoded NADH:Ubiquinone Oxidoreductase Core Subunit 1	Protein Coding	36	GCMTP003309	4.89908	https://www.genecards.org/cgi-bin/carddisp.pl?gene=MT-ND1
Ulcerative colitis	CRCS11	Colorectal Cancer, Susceptibility To, 11	Genetic Locus	2	GC20U900444	4.89908	https://www.genecards.org/cgi-bin/carddisp.pl?gene=CRCS11
Ulcerative colitis	CRCS2	Colorectal Cancer, Susceptibility To, 2	Genetic Locus	2	GC08U901124	4.89908	https://www.genecards.org/cgi-bin/carddisp.pl?gene=CRCS2
Ulcerative colitis	CRCS5	Colorectal Cancer, Susceptibility To, 5	Genetic Locus	2	GC10U901096	4.89908	https://www.genecards.org/cgi-bin/carddisp.pl?gene=CRCS5
Ulcerative colitis	CRCS6	Colorectal Cancer, Susceptibility To, 6	Genetic Locus	2	GC08U901098	4.89908	https://www.genecards.org/cgi-bin/carddisp.pl?gene=CRCS6
Ulcerative colitis	CRCS7	Colorectal Cancer, Susceptibility To, 7	Genetic Locus	2	GC11U901214	4.89908	https://www.genecards.org/cgi-bin/carddisp.pl?gene=CRCS7
Ulcerative colitis	CRCS8	Colorectal Cancer, Susceptibility To, 8	Genetic Locus	2	GC14U900916	4.89908	https://www.genecards.org/cgi-bin/carddisp.pl?gene=CRCS8
Ulcerative colitis	CRCS9	Colorectal Cancer, Susceptibility To, 9	Genetic Locus	2	GC16U901133	4.89908	https://www.genecards.org/cgi-bin/carddisp.pl?gene=CRCS9
Ulcerative colitis	IBD11	Inflammatory Bowel Disease 11	Genetic Locus	2	GC07U903153	4.89908	https://www.genecards.org/cgi-bin/carddisp.pl?gene=IBD11
Ulcerative colitis	IBD12	Inflammatory Bowel Disease 12	Genetic Locus	2	GC03U901153	4.89908	https://www.genecards.org/cgi-bin/carddisp.pl?gene=IBD12
Ulcerative colitis	IBD15	Inflammatory Bowel Disease-15	Genetic Locus	2	GC10U901075	4.89908	https://www.genecards.org/cgi-bin/carddisp.pl?gene=IBD15
Ulcerative colitis	IBD16	Inflammatory Bowel Disease-16	Genetic Locus	2	GC09U901202	4.89908	https://www.genecards.org/cgi-bin/carddisp.pl?gene=IBD16
Ulcerative colitis	IBD18	Inflammatory Bowel Disease-18	Genetic Locus	2	GC05U901053	4.89908	https://www.genecards.org/cgi-bin/carddisp.pl?gene=IBD18
Ulcerative colitis	IBD20	Inflammatory Bowel Disease-20	Genetic Locus	2	GC10U901067	4.89908	https://www.genecards.org/cgi-bin/carddisp.pl?gene=IBD20
Ulcerative colitis	IBD22	Inflammatory Bowel Disease-22	Genetic Locus	2	GC17U901173	4.89908	https://www.genecards.org/cgi-bin/carddisp.pl?gene=IBD22
Ulcerative colitis	IBD23	Inflammatory Bowel Disease-23	Genetic Locus	2	GC01U902305	4.89908	https://www.genecards.org/cgi-bin/carddisp.pl?gene=IBD23
Ulcerative colitis	IBD24	Inflammatory Bowel Disease-24	Genetic Locus	2	GC20U900442	4.89908	https://www.genecards.org/cgi-bin/carddisp.pl?gene=IBD24
Ulcerative colitis	IBD26	Inflammatory Bowel Disease-26	Genetic Locus	2	GC12U901067	4.89908	https://www.genecards.org/cgi-bin/carddisp.pl?gene=IBD26
Ulcerative colitis	IBD27	Inflammatory Bowel Disease-27	Genetic Locus	2	GC13U900664	4.89908	https://www.genecards.org/cgi-bin/carddisp.pl?gene=IBD27
Ulcerative colitis	MIR222	MicroRNA 222	RNA Gene	23	GC0XM045747	4.89663	https://www.genecards.org/cgi-bin/carddisp.pl?gene=MIR222
Ulcerative colitis	BMP6	Bone Morphogenetic Protein 6	Protein Coding	50	GC06P007726	4.87627	https://www.genecards.org/cgi-bin/carddisp.pl?gene=BMP6
Ulcerative colitis	EBI3	Epstein-Barr Virus Induced 3	Protein Coding	46	GC19P004232	4.87019	https://www.genecards.org/cgi-bin/carddisp.pl?gene=EBI3
Ulcerative colitis	MAPK14	Mitogen-Activated Protein Kinase 14	Protein Coding	58	GC06P092286	4.86422	https://www.genecards.org/cgi-bin/carddisp.pl?gene=MAPK14
Ulcerative colitis	NAT1	N-Acetyltransferase 1	Protein Coding	50	GC08P018183	4.86377	https://www.genecards.org/cgi-bin/carddisp.pl?gene=NAT1
Ulcerative colitis	ARPC1B	Actin Related Protein 2/3 Complex Subunit 1B	Protein Coding	50	GC07P099374	4.86357	https://www.genecards.org/cgi-bin/carddisp.pl?gene=ARPC1B
Ulcerative colitis	SIAE	Sialic Acid Acetylesterase	Protein Coding	44	GC11M124633	4.84388	https://www.genecards.org/cgi-bin/carddisp.pl?gene=SIAE
Ulcerative colitis	IL1RL2	Interleukin 1 Receptor Like 2	Protein Coding	50	GC02P102186	4.83973	https://www.genecards.org/cgi-bin/carddisp.pl?gene=IL1RL2
Ulcerative colitis	RFXANK	Regulatory Factor X Associated Ankyrin Containing Protein	Protein Coding	47	GC19P019192	4.83509	https://www.genecards.org/cgi-bin/carddisp.pl?gene=RFXANK
Ulcerative colitis	RFXAP	Regulatory Factor X Associated Protein	Protein Coding	43	GC13P036819	4.83509	https://www.genecards.org/cgi-bin/carddisp.pl?gene=RFXAP
Ulcerative colitis	CYP1A2	Cytochrome P450 Family 1 Subfamily A Member 2	Protein Coding	52	GC15P074748	4.8339	https://www.genecards.org/cgi-bin/carddisp.pl?gene=CYP1A2
Ulcerative colitis	MYD88	MYD88 Innate Immune Signal Transduction Adaptor	Protein Coding	56	GC03P038152	4.82713	https://www.genecards.org/cgi-bin/carddisp.pl?gene=MYD88
Ulcerative colitis	DPYD	Dihydropyrimidine Dehydrogenase	Protein Coding	59	GC01M097015	4.80726	https://www.genecards.org/cgi-bin/carddisp.pl?gene=DPYD
Ulcerative colitis	PON1	Paraoxonase 1	Protein Coding	55	GC07M095297	4.80542	https://www.genecards.org/cgi-bin/carddisp.pl?gene=PON1
Ulcerative colitis	ETS1	ETS Proto-Oncogene 1, Transcription Factor	Protein Coding	53	GC11M128458	4.79628	https://www.genecards.org/cgi-bin/carddisp.pl?gene=ETS1
Ulcerative colitis	HLA-DRB5	Major Histocompatibility Complex, Class II, DR Beta 5	Protein Coding	46	GC06M071768	4.78812	https://www.genecards.org/cgi-bin/carddisp.pl?gene=HLA-DRB5
Ulcerative colitis	BLTP1	Bridge-Like Lipid Transfer Protein Family Member 1	Protein Coding	39	GC04P122154	4.78702	https://www.genecards.org/cgi-bin/carddisp.pl?gene=BLTP1
Ulcerative colitis	CCKBR	Cholecystokinin B Receptor	Protein Coding	51	GC11P006259	4.78395	https://www.genecards.org/cgi-bin/carddisp.pl?gene=CCKBR
Ulcerative colitis	C4B	Complement C4B (Chido Blood Group)	Protein Coding	48	GC06P032014	4.78387	https://www.genecards.org/cgi-bin/carddisp.pl?gene=C4B
Ulcerative colitis	B2M	Beta-2-Microglobulin	Protein Coding	56	GC15P044711	4.77604	https://www.genecards.org/cgi-bin/carddisp.pl?gene=B2M
Ulcerative colitis	TIMP2	TIMP Metallopeptidase Inhibitor 2	Protein Coding	48	GC17M078852	4.77215	https://www.genecards.org/cgi-bin/carddisp.pl?gene=TIMP2
Ulcerative colitis	MGMT	O-6-Methylguanine-DNA Methyltransferase	Protein Coding	56	GC10P129467	4.76947	https://www.genecards.org/cgi-bin/carddisp.pl?gene=MGMT
Ulcerative colitis	HTR3A	5-Hydroxytryptamine Receptor 3A	Protein Coding	53	GC11P113975	4.76552	https://www.genecards.org/cgi-bin/carddisp.pl?gene=HTR3A
Ulcerative colitis	CD59	CD59 Molecule (CD59 Blood Group)	Protein Coding	53	GC11M033704	4.75628	https://www.genecards.org/cgi-bin/carddisp.pl?gene=CD59
Ulcerative colitis	PSMB9	Proteasome 20S Subunit Beta 9	Protein Coding	52	GC06P092185	4.75599	https://www.genecards.org/cgi-bin/carddisp.pl?gene=PSMB9
Ulcerative colitis	DLD	Dihydrolipoamide Dehydrogenase	Protein Coding	56	GC07P107890	4.75371	https://www.genecards.org/cgi-bin/carddisp.pl?gene=DLD
Ulcerative colitis	MAP2K1	Mitogen-Activated Protein Kinase Kinase 1	Protein Coding	60	GC15P066386	4.75309	https://www.genecards.org/cgi-bin/carddisp.pl?gene=MAP2K1
Ulcerative colitis	CX3CR1	C-X3-C Motif Chemokine Receptor 1	Protein Coding	50	GC03M039279	4.74238	https://www.genecards.org/cgi-bin/carddisp.pl?gene=CX3CR1
Ulcerative colitis	MYB	MYB Proto-Oncogene, Transcription Factor	Protein Coding	55	GC06P135180	4.73395	https://www.genecards.org/cgi-bin/carddisp.pl?gene=MYB
Ulcerative colitis	DST	Dystonin	Protein Coding	49	GC06M056457	4.72672	https://www.genecards.org/cgi-bin/carddisp.pl?gene=DST
Ulcerative colitis	IL17REL	Interleukin 17 Receptor E Like	Protein Coding	34	GC22M061613	4.71735	https://www.genecards.org/cgi-bin/carddisp.pl?gene=IL17REL
Ulcerative colitis	KLF6	KLF Transcription Factor 6	Protein Coding	50	GC10M003779	4.70683	https://www.genecards.org/cgi-bin/carddisp.pl?gene=KLF6
Ulcerative colitis	HAVCR2	Hepatitis A Virus Cellular Receptor 2	Protein Coding	52	GC05M157063	4.7044	https://www.genecards.org/cgi-bin/carddisp.pl?gene=HAVCR2
Ulcerative colitis	CDKN2B-AS1	CDKN2B Antisense RNA 1	RNA Gene	26	GC09P021994	4.70437	https://www.genecards.org/cgi-bin/carddisp.pl?gene=CDKN2B-AS1
Ulcerative colitis	COL3A1	Collagen Type III Alpha 1 Chain	Protein Coding	54	GC02P188974	4.69346	https://www.genecards.org/cgi-bin/carddisp.pl?gene=COL3A1
Ulcerative colitis	CFLAR	CASP8 And FADD Like Apoptosis Regulator	Protein Coding	51	GC02P201122	4.67137	https://www.genecards.org/cgi-bin/carddisp.pl?gene=CFLAR
Ulcerative colitis	TF	Transferrin	Protein Coding	57	GC03P135056	4.65144	https://www.genecards.org/cgi-bin/carddisp.pl?gene=TF
Ulcerative colitis	FOS	Fos Proto-Oncogene, AP-1 Transcription Factor Subunit	Protein Coding	57	GC14P075278	4.63142	https://www.genecards.org/cgi-bin/carddisp.pl?gene=FOS
Ulcerative colitis	CAMP	Cathelicidin Antimicrobial Peptide	Protein Coding	46	GC03P049961	4.63021	https://www.genecards.org/cgi-bin/carddisp.pl?gene=CAMP
Ulcerative colitis	IGHE	Immunoglobulin Heavy Constant Epsilon	Protein Coding	36	GC14M113319	4.63002	https://www.genecards.org/cgi-bin/carddisp.pl?gene=IGHE
Ulcerative colitis	CCRL2	C-C Motif Chemokine Receptor Like 2	Protein Coding	46	GC03P046407	4.62559	https://www.genecards.org/cgi-bin/carddisp.pl?gene=CCRL2
Ulcerative colitis	CYP2E1	Cytochrome P450 Family 2 Subfamily E Member 1	Protein Coding	52	GC10P133520	4.6112	https://www.genecards.org/cgi-bin/carddisp.pl?gene=CYP2E1
Ulcerative colitis	KRT18	Keratin 18	Protein Coding	56	GC12P052948	4.60702	https://www.genecards.org/cgi-bin/carddisp.pl?gene=KRT18
Ulcerative colitis	IL6ST	Interleukin 6 Cytokine Family Signal Transducer	Protein Coding	56	GC05M055935	4.59782	https://www.genecards.org/cgi-bin/carddisp.pl?gene=IL6ST
Ulcerative colitis	CASR	Calcium Sensing Receptor	Protein Coding	57	GC03P122183	4.59199	https://www.genecards.org/cgi-bin/carddisp.pl?gene=CASR
Ulcerative colitis	HLA-DPA1	Major Histocompatibility Complex, Class II, DP Alpha 1	Protein Coding	48	GC06M033064	4.58626	https://www.genecards.org/cgi-bin/carddisp.pl?gene=HLA-DPA1
Ulcerative colitis	PLAUR	Plasminogen Activator, Urokinase Receptor	Protein Coding	52	GC19M043646	4.58172	https://www.genecards.org/cgi-bin/carddisp.pl?gene=PLAUR
Ulcerative colitis	CCL7	C-C Motif Chemokine Ligand 7	Protein Coding	50	GC17P034270	4.57878	https://www.genecards.org/cgi-bin/carddisp.pl?gene=CCL7
Ulcerative colitis	BIRC3	Baculoviral IAP Repeat Containing 3	Protein Coding	53	GC11P102317	4.57488	https://www.genecards.org/cgi-bin/carddisp.pl?gene=BIRC3
Ulcerative colitis	ACE2	Angiotensin Converting Enzyme 2	Protein Coding	56	GC0XM015494	4.56649	https://www.genecards.org/cgi-bin/carddisp.pl?gene=ACE2
Ulcerative colitis	SLC44A4	Solute Carrier Family 44 Member 4	Protein Coding	48	GC06M031863	4.56246	https://www.genecards.org/cgi-bin/carddisp.pl?gene=SLC44A4
Ulcerative colitis	CLDN1	Claudin 1	Protein Coding	53	GC03M190305	4.55886	https://www.genecards.org/cgi-bin/carddisp.pl?gene=CLDN1
Ulcerative colitis	MIR221	MicroRNA 221	RNA Gene	23	GC0XM045746	4.55727	https://www.genecards.org/cgi-bin/carddisp.pl?gene=MIR221
Ulcerative colitis	MIR200C	MicroRNA 200c	RNA Gene	25	GC12P023564	4.54943	https://www.genecards.org/cgi-bin/carddisp.pl?gene=MIR200C
Ulcerative colitis	AHR	Aryl Hydrocarbon Receptor	Protein Coding	54	GC07P016916	4.54627	https://www.genecards.org/cgi-bin/carddisp.pl?gene=AHR
Ulcerative colitis	PDE4A	Phosphodiesterase 4A	Protein Coding	51	GC19P010416	4.53154	https://www.genecards.org/cgi-bin/carddisp.pl?gene=PDE4A
Ulcerative colitis	ITGB1	Integrin Subunit Beta 1	Protein Coding	57	GC10M033645	4.52658	https://www.genecards.org/cgi-bin/carddisp.pl?gene=ITGB1
Ulcerative colitis	KLRK1	Killer Cell Lectin Like Receptor K1	Protein Coding	48	GC12M022630	4.52517	https://www.genecards.org/cgi-bin/carddisp.pl?gene=KLRK1
Ulcerative colitis	HSPA1B	Heat Shock Protein Family A (Hsp70) Member 1B	Protein Coding	47	GC06P092170	4.52075	https://www.genecards.org/cgi-bin/carddisp.pl?gene=HSPA1B
Ulcerative colitis	TNFSF10	TNF Superfamily Member 10	Protein Coding	51	GC03M172505	4.51791	https://www.genecards.org/cgi-bin/carddisp.pl?gene=TNFSF10
Ulcerative colitis	APOE	Apolipoprotein E	Protein Coding	57	GC19P073055	4.51448	https://www.genecards.org/cgi-bin/carddisp.pl?gene=APOE
Ulcerative colitis	EPO	Erythropoietin	Protein Coding	49	GC07P100720	4.51321	https://www.genecards.org/cgi-bin/carddisp.pl?gene=EPO
Ulcerative colitis	WNT4	Wnt Family Member 4	Protein Coding	53	GC01M022190	4.51126	https://www.genecards.org/cgi-bin/carddisp.pl?gene=WNT4
Ulcerative colitis	FGF19	Fibroblast Growth Factor 19	Protein Coding	49	GC11M099882	4.48961	https://www.genecards.org/cgi-bin/carddisp.pl?gene=FGF19
Ulcerative colitis	MIR200B	MicroRNA 200b	RNA Gene	24	GC01P001167	4.48688	https://www.genecards.org/cgi-bin/carddisp.pl?gene=MIR200B
Ulcerative colitis	LINC01475	Long Intergenic Non-Protein Coding RNA 1475	RNA Gene	14	GC10M099526	4.48674	https://www.genecards.org/cgi-bin/carddisp.pl?gene=LINC01475
Ulcerative colitis	HSPA1L	Heat Shock Protein Family A (Hsp70) Member 1 Like	Protein Coding	51	GC06M031809	4.47264	https://www.genecards.org/cgi-bin/carddisp.pl?gene=HSPA1L
Ulcerative colitis	IRAK1	Interleukin 1 Receptor Associated Kinase 1	Protein Coding	56	GC0XM154010	4.46305	https://www.genecards.org/cgi-bin/carddisp.pl?gene=IRAK1
Ulcerative colitis	MIR195	MicroRNA 195	RNA Gene	22	GC17M007043	4.46129	https://www.genecards.org/cgi-bin/carddisp.pl?gene=MIR195
Ulcerative colitis	ZPBP2	Zona Pellucida Binding Protein 2	Protein Coding	41	GC17P061876	4.45062	https://www.genecards.org/cgi-bin/carddisp.pl?gene=ZPBP2
Ulcerative colitis	KRT8	Keratin 8	Protein Coding	53	GC12M052897	4.44253	https://www.genecards.org/cgi-bin/carddisp.pl?gene=KRT8
Ulcerative colitis	CCL24	C-C Motif Chemokine Ligand 24	Protein Coding	44	GC07M077207	4.44138	https://www.genecards.org/cgi-bin/carddisp.pl?gene=CCL24
Ulcerative colitis	NLRP6	NLR Family Pyrin Domain Containing 6	Protein Coding	46	GC11P000278	4.43672	https://www.genecards.org/cgi-bin/carddisp.pl?gene=NLRP6
Ulcerative colitis	CYP1B1	Cytochrome P450 Family 1 Subfamily B Member 1	Protein Coding	54	GC02M038066	4.43032	https://www.genecards.org/cgi-bin/carddisp.pl?gene=CYP1B1
Ulcerative colitis	IL18BP	Interleukin 18 Binding Protein	Protein Coding	48	GC11P071998	4.42088	https://www.genecards.org/cgi-bin/carddisp.pl?gene=IL18BP
Ulcerative colitis	GREM1	Gremlin 1, DAN Family BMP Antagonist	Protein Coding	50	GC15P046226	4.41942	https://www.genecards.org/cgi-bin/carddisp.pl?gene=GREM1
Ulcerative colitis	ADIPOQ	Adiponectin, C1Q And Collagen Domain Containing	Protein Coding	52	GC03P186842	4.40721	https://www.genecards.org/cgi-bin/carddisp.pl?gene=ADIPOQ
Ulcerative colitis	TFRC	Transferrin Receptor	Protein Coding	58	GC03M196056	4.40715	https://www.genecards.org/cgi-bin/carddisp.pl?gene=TFRC
Ulcerative colitis	IFNA1	Interferon Alpha 1	Protein Coding	45	GC09P021611	4.39575	https://www.genecards.org/cgi-bin/carddisp.pl?gene=IFNA1
Ulcerative colitis	PLA2G7	Phospholipase A2 Group VII	Protein Coding	56	GC06M046704	4.38599	https://www.genecards.org/cgi-bin/carddisp.pl?gene=PLA2G7
Ulcerative colitis	NOX1	NADPH Oxidase 1	Protein Coding	50	GC0XM100843	4.3786	https://www.genecards.org/cgi-bin/carddisp.pl?gene=NOX1
Ulcerative colitis	IL1RL1	Interleukin 1 Receptor Like 1	Protein Coding	48	GC02P102294	4.37309	https://www.genecards.org/cgi-bin/carddisp.pl?gene=IL1RL1
Ulcerative colitis	AMACR	Alpha-Methylacyl-CoA Racemase	Protein Coding	51	GC05M033986	4.35901	https://www.genecards.org/cgi-bin/carddisp.pl?gene=AMACR
Ulcerative colitis	CHAT	Choline O-Acetyltransferase	Protein Coding	55	GC10P049609	4.35794	https://www.genecards.org/cgi-bin/carddisp.pl?gene=CHAT
Ulcerative colitis	SLC6A4	Solute Carrier Family 6 Member 4	Protein Coding	55	GC17M030194	4.35355	https://www.genecards.org/cgi-bin/carddisp.pl?gene=SLC6A4
Ulcerative colitis	TRAF3IP2	TRAF3 Interacting Protein 2	Protein Coding	52	GC06M111555	4.34952	https://www.genecards.org/cgi-bin/carddisp.pl?gene=TRAF3IP2
Ulcerative colitis	IL2RB	Interleukin 2 Receptor Subunit Beta	Protein Coding	56	GC22M061459	4.33879	https://www.genecards.org/cgi-bin/carddisp.pl?gene=IL2RB
Ulcerative colitis	SERPINF2	Serpin Family F Member 2	Protein Coding	52	GC17P001742	4.33724	https://www.genecards.org/cgi-bin/carddisp.pl?gene=SERPINF2
Ulcerative colitis	GOT1	Glutamic-Oxaloacetic Transaminase 1	Protein Coding	52	GC10M099396	4.33605	https://www.genecards.org/cgi-bin/carddisp.pl?gene=GOT1
Ulcerative colitis	SLC17A5	Solute Carrier Family 17 Member 5	Protein Coding	51	GC06M073593	4.33414	https://www.genecards.org/cgi-bin/carddisp.pl?gene=SLC17A5
Ulcerative colitis	ENG	Endoglin	Protein Coding	55	GC09M127815	4.30729	https://www.genecards.org/cgi-bin/carddisp.pl?gene=ENG
Ulcerative colitis	SERPINA3	Serpin Family A Member 3	Protein Coding	50	GC14P094612	4.28748	https://www.genecards.org/cgi-bin/carddisp.pl?gene=SERPINA3
Ulcerative colitis	CD46	CD46 Molecule	Protein Coding	55	GC01P207752	4.28063	https://www.genecards.org/cgi-bin/carddisp.pl?gene=CD46
Ulcerative colitis	CASP8	Caspase 8	Protein Coding	59	GC02P201233	4.27102	https://www.genecards.org/cgi-bin/carddisp.pl?gene=CASP8
Ulcerative colitis	TRAF6	TNF Receptor Associated Factor 6	Protein Coding	52	GC11M036467	4.26936	https://www.genecards.org/cgi-bin/carddisp.pl?gene=TRAF6
Ulcerative colitis	STX1A	Syntaxin 1A	Protein Coding	55	GC07M073700	4.26498	https://www.genecards.org/cgi-bin/carddisp.pl?gene=STX1A
Ulcerative colitis	CFB	Complement Factor B	Protein Coding	54	GC06P031945	4.26108	https://www.genecards.org/cgi-bin/carddisp.pl?gene=CFB
Ulcerative colitis	MMP14	Matrix Metallopeptidase 14	Protein Coding	57	GC14P034667	4.2562	https://www.genecards.org/cgi-bin/carddisp.pl?gene=MMP14
Ulcerative colitis	SBNO2	Strawberry Notch Homolog 2	Protein Coding	42	GC19M001107	4.25438	https://www.genecards.org/cgi-bin/carddisp.pl?gene=SBNO2
Ulcerative colitis	MIR196A1	MicroRNA 196a-1	RNA Gene	24	GC17M048632	4.24775	https://www.genecards.org/cgi-bin/carddisp.pl?gene=MIR196A1
Ulcerative colitis	MTHFD1	Methylenetetrahydrofolate Dehydrogenase, Cyclohydrolase And Formyltetrahydrofolate Synthetase 1	Protein Coding	52	GC14P064388	4.23959	https://www.genecards.org/cgi-bin/carddisp.pl?gene=MTHFD1
Ulcerative colitis	ISG15	ISG15 Ubiquitin Like Modifier	Protein Coding	53	GC01P001001	4.23764	https://www.genecards.org/cgi-bin/carddisp.pl?gene=ISG15
Ulcerative colitis	MIR483	MicroRNA 483	RNA Gene	23	GC11M004509	4.23569	https://www.genecards.org/cgi-bin/carddisp.pl?gene=MIR483
Ulcerative colitis	TPI1	Triosephosphate Isomerase 1	Protein Coding	54	GC12P006867	4.23406	https://www.genecards.org/cgi-bin/carddisp.pl?gene=TPI1
Ulcerative colitis	DNASE1	Deoxyribonuclease 1	Protein Coding	50	GC16P003611	4.22415	https://www.genecards.org/cgi-bin/carddisp.pl?gene=DNASE1
Ulcerative colitis	SP140	SP140 Nuclear Body Protein	Protein Coding	43	GC02P230203	4.21555	https://www.genecards.org/cgi-bin/carddisp.pl?gene=SP140
Ulcerative colitis	HSPA1A	Heat Shock Protein Family A (Hsp70) Member 1A	Protein Coding	53	GC06P092171	4.20648	https://www.genecards.org/cgi-bin/carddisp.pl?gene=HSPA1A
Ulcerative colitis	MMP10	Matrix Metallopeptidase 10	Protein Coding	51	GC11M102770	4.20368	https://www.genecards.org/cgi-bin/carddisp.pl?gene=MMP10
Ulcerative colitis	ADAD1	Adenosine Deaminase Domain Containing 1	Protein Coding	41	GC04P122378	4.20183	https://www.genecards.org/cgi-bin/carddisp.pl?gene=ADAD1
Ulcerative colitis	CXCL9	C-X-C Motif Chemokine Ligand 9	Protein Coding	47	GC04M076001	4.19669	https://www.genecards.org/cgi-bin/carddisp.pl?gene=CXCL9
Ulcerative colitis	WASL	WASP Like Actin Nucleation Promoting Factor	Protein Coding	48	GC07M123681	4.1939	https://www.genecards.org/cgi-bin/carddisp.pl?gene=WASL
Ulcerative colitis	MST1R	Macrophage Stimulating 1 Receptor	Protein Coding	56	GC03M051598	4.18889	https://www.genecards.org/cgi-bin/carddisp.pl?gene=MST1R
Ulcerative colitis	DPEP1	Dipeptidase 1	Protein Coding	50	GC16P089613	4.18461	https://www.genecards.org/cgi-bin/carddisp.pl?gene=DPEP1
Ulcerative colitis	PSMB8	Proteasome 20S Subunit Beta 8	Protein Coding	56	GC06M032840	4.17059	https://www.genecards.org/cgi-bin/carddisp.pl?gene=PSMB8
Ulcerative colitis	SATB2	SATB Homeobox 2	Protein Coding	51	GC02M199269	4.16916	https://www.genecards.org/cgi-bin/carddisp.pl?gene=SATB2
Ulcerative colitis	NFKBIL1	NFKB Inhibitor Like 1	Protein Coding	43	GC06P092151	4.16066	https://www.genecards.org/cgi-bin/carddisp.pl?gene=NFKBIL1
Ulcerative colitis	CARD6	Caspase Recruitment Domain Family Member 6	Protein Coding	44	GC05P040841	4.15238	https://www.genecards.org/cgi-bin/carddisp.pl?gene=CARD6
Ulcerative colitis	MUC4	Mucin 4, Cell Surface Associated	Protein Coding	47	GC03M195746	4.13974	https://www.genecards.org/cgi-bin/carddisp.pl?gene=MUC4
Ulcerative colitis	PBX2	PBX Homeobox 2	Protein Coding	44	GC06M032184	4.13568	https://www.genecards.org/cgi-bin/carddisp.pl?gene=PBX2
Ulcerative colitis	PRKD1	Protein Kinase D1	Protein Coding	56	GC14M029576	4.13191	https://www.genecards.org/cgi-bin/carddisp.pl?gene=PRKD1
Ulcerative colitis	DNAH8	Dynein Axonemal Heavy Chain 8	Protein Coding	44	GC06P092313	4.11912	https://www.genecards.org/cgi-bin/carddisp.pl?gene=DNAH8
Ulcerative colitis	DAB2	DAB Adaptor Protein 2	Protein Coding	48	GC05M039371	4.11807	https://www.genecards.org/cgi-bin/carddisp.pl?gene=DAB2
Ulcerative colitis	CD27-AS1	CD27 Antisense RNA 1	RNA Gene	18	GC12M006439	4.09563	https://www.genecards.org/cgi-bin/carddisp.pl?gene=CD27-AS1
Ulcerative colitis	IL21-AS1	IL21 Antisense RNA 1	RNA Gene	18	GC04P122544	4.09563	https://www.genecards.org/cgi-bin/carddisp.pl?gene=IL21-AS1
Ulcerative colitis	DMBT1	Deleted In Malignant Brain Tumors 1	Protein Coding	46	GC10P122560	4.08904	https://www.genecards.org/cgi-bin/carddisp.pl?gene=DMBT1
Ulcerative colitis	CLIC1	Chloride Intracellular Channel 1	Protein Coding	49	GC06M071736	4.08671	https://www.genecards.org/cgi-bin/carddisp.pl?gene=CLIC1
Ulcerative colitis	CXCR4	C-X-C Motif Chemokine Receptor 4	Protein Coding	59	GC02M136114	4.08504	https://www.genecards.org/cgi-bin/carddisp.pl?gene=CXCR4
Ulcerative colitis	AREG	Amphiregulin	Protein Coding	50	GC04P074445	4.08232	https://www.genecards.org/cgi-bin/carddisp.pl?gene=AREG
Ulcerative colitis	HNMT	Histamine N-Methyltransferase	Protein Coding	52	GC02P137964	4.07846	https://www.genecards.org/cgi-bin/carddisp.pl?gene=HNMT
Ulcerative colitis	SCG2	Secretogranin II	Protein Coding	46	GC02M223596	4.07766	https://www.genecards.org/cgi-bin/carddisp.pl?gene=SCG2
Ulcerative colitis	TMEFF2	Transmembrane Protein With EGF Like And Two Follistatin Like Domains 2	Protein Coding	46	GC02M191950	4.07362	https://www.genecards.org/cgi-bin/carddisp.pl?gene=TMEFF2
Ulcerative colitis	CCR9	C-C Motif Chemokine Receptor 9	Protein Coding	47	GC03P047602	4.05919	https://www.genecards.org/cgi-bin/carddisp.pl?gene=CCR9
Ulcerative colitis	CFTR	CF Transmembrane Conductance Regulator	Protein Coding	59	GC07P117287	4.05266	https://www.genecards.org/cgi-bin/carddisp.pl?gene=CFTR
Ulcerative colitis	C3	Complement C3	Protein Coding	56	GC19M006677	4.03234	https://www.genecards.org/cgi-bin/carddisp.pl?gene=C3
Ulcerative colitis	TNFRSF4	TNF Receptor Superfamily Member 4	Protein Coding	50	GC01M001211	4.03087	https://www.genecards.org/cgi-bin/carddisp.pl?gene=TNFRSF4
Ulcerative colitis	COL17A1	Collagen Type XVII Alpha 1 Chain	Protein Coding	51	GC10M104031	4.02994	https://www.genecards.org/cgi-bin/carddisp.pl?gene=COL17A1
Ulcerative colitis	DHFR	Dihydrofolate Reductase	Protein Coding	55	GC05M080626	4.02105	https://www.genecards.org/cgi-bin/carddisp.pl?gene=DHFR
Ulcerative colitis	CCL25	C-C Motif Chemokine Ligand 25	Protein Coding	44	GC19P008052	4.01464	https://www.genecards.org/cgi-bin/carddisp.pl?gene=CCL25
Ulcerative colitis	GCKR	Glucokinase Regulator	Protein Coding	48	GC02P027496	4.0062	https://www.genecards.org/cgi-bin/carddisp.pl?gene=GCKR
Ulcerative colitis	SKIC3	SKI3 Subunit Of Superkiller Complex	Protein Coding	47	GC05M095461	4.0052	https://www.genecards.org/cgi-bin/carddisp.pl?gene=SKIC3
Ulcerative colitis	FLT4	Fms Related Receptor Tyrosine Kinase 4	Protein Coding	59	GC05M180644	4.00472	https://www.genecards.org/cgi-bin/carddisp.pl?gene=FLT4
Ulcerative colitis	KDR	Kinase Insert Domain Receptor	Protein Coding	60	GC04M055078	4.00275	https://www.genecards.org/cgi-bin/carddisp.pl?gene=KDR
Ulcerative colitis	TNFRSF14	TNF Receptor Superfamily Member 14	Protein Coding	50	GC01P004431	4.00027	https://www.genecards.org/cgi-bin/carddisp.pl?gene=TNFRSF14
Ulcerative colitis	KIR3DL1	Killer Cell Immunoglobulin Like Receptor, Three Ig Domains And Long Cytoplasmic Tail 1	Protein Coding	46	GC19P073503	3.99742	https://www.genecards.org/cgi-bin/carddisp.pl?gene=KIR3DL1
Ulcerative colitis	CD34	CD34 Molecule	Protein Coding	52	GC01M207880	3.99341	https://www.genecards.org/cgi-bin/carddisp.pl?gene=CD34
Ulcerative colitis	PTGER3	Prostaglandin E Receptor 3	Protein Coding	53	GC01M070852	3.99054	https://www.genecards.org/cgi-bin/carddisp.pl?gene=PTGER3
Ulcerative colitis	EDNRA	Endothelin Receptor Type A	Protein Coding	56	GC04P147480	3.9904	https://www.genecards.org/cgi-bin/carddisp.pl?gene=EDNRA
Ulcerative colitis	GSN	Gelsolin	Protein Coding	56	GC09P121201	3.98862	https://www.genecards.org/cgi-bin/carddisp.pl?gene=GSN
Ulcerative colitis	PROM1	Prominin 1	Protein Coding	53	GC04M015965	3.97973	https://www.genecards.org/cgi-bin/carddisp.pl?gene=PROM1
Ulcerative colitis	ERAP2	Endoplasmic Reticulum Aminopeptidase 2	Protein Coding	47	GC05P096875	3.97971	https://www.genecards.org/cgi-bin/carddisp.pl?gene=ERAP2
Ulcerative colitis	IL2RG	Interleukin 2 Receptor Subunit Gamma	Protein Coding	55	GC0XM071108	3.97433	https://www.genecards.org/cgi-bin/carddisp.pl?gene=IL2RG
Ulcerative colitis	PIGR	Polymeric Immunoglobulin Receptor	Protein Coding	48	GC01M206928	3.96971	https://www.genecards.org/cgi-bin/carddisp.pl?gene=PIGR
Ulcerative colitis	ICOS	Inducible T Cell Costimulator	Protein Coding	52	GC02P203937	3.96443	https://www.genecards.org/cgi-bin/carddisp.pl?gene=ICOS
Ulcerative colitis	FOSL1	FOS Like 1, AP-1 Transcription Factor Subunit	Protein Coding	51	GC11M099737	3.96257	https://www.genecards.org/cgi-bin/carddisp.pl?gene=FOSL1
Ulcerative colitis	MIR27A	MicroRNA 27a	RNA Gene	26	GC19M014656	3.96087	https://www.genecards.org/cgi-bin/carddisp.pl?gene=MIR27A
Ulcerative colitis	SIGLEC5	Sialic Acid Binding Ig Like Lectin 5	Protein Coding	47	GC19M071022	3.95981	https://www.genecards.org/cgi-bin/carddisp.pl?gene=SIGLEC5
Ulcerative colitis	EWSR1	EWS RNA Binding Protein 1	Protein Coding	51	GC22P044790	3.9595	https://www.genecards.org/cgi-bin/carddisp.pl?gene=EWSR1
Ulcerative colitis	CTSB	Cathepsin B	Protein Coding	59	GC08M011842	3.95837	https://www.genecards.org/cgi-bin/carddisp.pl?gene=CTSB
Ulcerative colitis	CHUK	Component Of Inhibitor Of Nuclear Factor Kappa B Kinase Complex	Protein Coding	58	GC10M100202	3.9553	https://www.genecards.org/cgi-bin/carddisp.pl?gene=CHUK
Ulcerative colitis	NR1H2	Nuclear Receptor Subfamily 1 Group H Member 2	Protein Coding	53	GC19P050329	3.9513	https://www.genecards.org/cgi-bin/carddisp.pl?gene=NR1H2
Ulcerative colitis	CD209	CD209 Molecule	Protein Coding	50	GC19M007739	3.94973	https://www.genecards.org/cgi-bin/carddisp.pl?gene=CD209
Ulcerative colitis	LGALS9	Galectin 9	Protein Coding	47	GC17P027629	3.94777	https://www.genecards.org/cgi-bin/carddisp.pl?gene=LGALS9
Ulcerative colitis	MIR301A	MicroRNA 301a	RNA Gene	23	GC17M059151	3.94674	https://www.genecards.org/cgi-bin/carddisp.pl?gene=MIR301A
Ulcerative colitis	DPF2	Double PHD Fingers 2	Protein Coding	50	GC11P070858	3.94387	https://www.genecards.org/cgi-bin/carddisp.pl?gene=DPF2
Ulcerative colitis	TNFRSF10B	TNF Receptor Superfamily Member 10b	Protein Coding	57	GC08M023020	3.93328	https://www.genecards.org/cgi-bin/carddisp.pl?gene=TNFRSF10B
Ulcerative colitis	AIRE	Autoimmune Regulator	Protein Coding	50	GC21P044285	3.92985	https://www.genecards.org/cgi-bin/carddisp.pl?gene=AIRE
Ulcerative colitis	KRT19	Keratin 19	Protein Coding	50	GC17M041523	3.91565	https://www.genecards.org/cgi-bin/carddisp.pl?gene=KRT19
Ulcerative colitis	BANK1	B Cell Scaffold Protein With Ankyrin Repeats 1	Protein Coding	43	GC04P101411	3.91183	https://www.genecards.org/cgi-bin/carddisp.pl?gene=BANK1
Ulcerative colitis	LSP1	Lymphocyte Specific Protein 1	Protein Coding	47	GC11P002155	3.9069	https://www.genecards.org/cgi-bin/carddisp.pl?gene=LSP1
Ulcerative colitis	SNAI1	Snail Family Transcriptional Repressor 1	Protein Coding	51	GC20P049982	3.89763	https://www.genecards.org/cgi-bin/carddisp.pl?gene=SNAI1
Ulcerative colitis	MTRR	5-Methyltetrahydrofolate-Homocysteine Methyltransferase Reductase	Protein Coding	50	GC05P007851	3.8946	https://www.genecards.org/cgi-bin/carddisp.pl?gene=MTRR
Ulcerative colitis	CEACAM5	CEA Cell Adhesion Molecule 5	Protein Coding	50	GC19P072938	3.88592	https://www.genecards.org/cgi-bin/carddisp.pl?gene=CEACAM5
Ulcerative colitis	CCL4	C-C Motif Chemokine Ligand 4	Protein Coding	47	GC17P036103	3.88503	https://www.genecards.org/cgi-bin/carddisp.pl?gene=CCL4
Ulcerative colitis	MIR199A1	MicroRNA 199a-1	RNA Gene	22	GC19M010817	3.88339	https://www.genecards.org/cgi-bin/carddisp.pl?gene=MIR199A1
Ulcerative colitis	CCL26	C-C Motif Chemokine Ligand 26	Protein Coding	44	GC07M075769	3.88032	https://www.genecards.org/cgi-bin/carddisp.pl?gene=CCL26
Ulcerative colitis	FGF23	Fibroblast Growth Factor 23	Protein Coding	52	GC12M004368	3.87421	https://www.genecards.org/cgi-bin/carddisp.pl?gene=FGF23
Ulcerative colitis	ENO1	Enolase 1	Protein Coding	54	GC01M008861	3.8705	https://www.genecards.org/cgi-bin/carddisp.pl?gene=ENO1
Ulcerative colitis	CDH23	Cadherin Related 23	Protein Coding	51	GC10P071396	3.86866	https://www.genecards.org/cgi-bin/carddisp.pl?gene=CDH23
Ulcerative colitis	CTSD	Cathepsin D	Protein Coding	59	GC11M001752	3.86094	https://www.genecards.org/cgi-bin/carddisp.pl?gene=CTSD
Ulcerative colitis	SLC22A23	Solute Carrier Family 22 Member 23	Protein Coding	42	GC06M003278	3.86077	https://www.genecards.org/cgi-bin/carddisp.pl?gene=SLC22A23
Ulcerative colitis	FUT3	Fucosyltransferase 3 (Lewis Blood Group)	Protein Coding	47	GC19M006915	3.85922	https://www.genecards.org/cgi-bin/carddisp.pl?gene=FUT3
Ulcerative colitis	BCL2L11	BCL2 Like 11	Protein Coding	52	GC02P111119	3.85274	https://www.genecards.org/cgi-bin/carddisp.pl?gene=BCL2L11
Ulcerative colitis	GPBAR1	G Protein-Coupled Bile Acid Receptor 1	Protein Coding	47	GC02P218259	3.85264	https://www.genecards.org/cgi-bin/carddisp.pl?gene=GPBAR1
Ulcerative colitis	CCHCR1	Coiled-Coil Alpha-Helical Rod Protein 1	Protein Coding	44	GC06M071672	3.84981	https://www.genecards.org/cgi-bin/carddisp.pl?gene=CCHCR1
Ulcerative colitis	MIR29A	MicroRNA 29a	RNA Gene	24	GC07M130876	3.8443	https://www.genecards.org/cgi-bin/carddisp.pl?gene=MIR29A
Ulcerative colitis	IGSF6	Immunoglobulin Superfamily Member 6	Protein Coding	42	GC16M021639	3.84077	https://www.genecards.org/cgi-bin/carddisp.pl?gene=IGSF6
Ulcerative colitis	MALAT1	Metastasis Associated Lung Adenocarcinoma Transcript 1	RNA Gene	27	GC11P070867	3.83492	https://www.genecards.org/cgi-bin/carddisp.pl?gene=MALAT1
Ulcerative colitis	MIR150	MicroRNA 150	RNA Gene	24	GC19M049500	3.83486	https://www.genecards.org/cgi-bin/carddisp.pl?gene=MIR150
Ulcerative colitis	TOLLIP	Toll Interacting Protein	Protein Coding	51	GC11M001274	3.8276	https://www.genecards.org/cgi-bin/carddisp.pl?gene=TOLLIP
Ulcerative colitis	HLA-DMA	Major Histocompatibility Complex, Class II, DM Alpha	Protein Coding	46	GC06M071795	3.81482	https://www.genecards.org/cgi-bin/carddisp.pl?gene=HLA-DMA
Ulcerative colitis	ESR2	Estrogen Receptor 2	Protein Coding	56	GC14M064084	3.79948	https://www.genecards.org/cgi-bin/carddisp.pl?gene=ESR2
Ulcerative colitis	HDAC9	Histone Deacetylase 9	Protein Coding	56	GC07P018086	3.79778	https://www.genecards.org/cgi-bin/carddisp.pl?gene=HDAC9
Ulcerative colitis	SLC16A1	Solute Carrier Family 16 Member 1	Protein Coding	54	GC01M113013	3.79192	https://www.genecards.org/cgi-bin/carddisp.pl?gene=SLC16A1
Ulcerative colitis	STAT5A	Signal Transducer And Activator Of Transcription 5A	Protein Coding	55	GC17P042287	3.78728	https://www.genecards.org/cgi-bin/carddisp.pl?gene=STAT5A
Ulcerative colitis	MIR139	MicroRNA 139	RNA Gene	23	GC11M072615	3.78538	https://www.genecards.org/cgi-bin/carddisp.pl?gene=MIR139
Ulcerative colitis	ICAM2	Intercellular Adhesion Molecule 2	Protein Coding	51	GC17M064002	3.76468	https://www.genecards.org/cgi-bin/carddisp.pl?gene=ICAM2
Ulcerative colitis	MIR424	MicroRNA 424	RNA Gene	21	GC0XM134700	3.75833	https://www.genecards.org/cgi-bin/carddisp.pl?gene=MIR424
Ulcerative colitis	GPX2	Glutathione Peroxidase 2	Protein Coding	48	GC14M064939	3.75604	https://www.genecards.org/cgi-bin/carddisp.pl?gene=GPX2
Ulcerative colitis	TRIM21	Tripartite Motif Containing 21	Protein Coding	50	GC11M004384	3.74948	https://www.genecards.org/cgi-bin/carddisp.pl?gene=TRIM21
Ulcerative colitis	LGALS4	Galectin 4	Protein Coding	44	GC19M070551	3.73944	https://www.genecards.org/cgi-bin/carddisp.pl?gene=LGALS4
Ulcerative colitis	ENO2	Enolase 2	Protein Coding	54	GC12P006913	3.73747	https://www.genecards.org/cgi-bin/carddisp.pl?gene=ENO2
Ulcerative colitis	SHH	Sonic Hedgehog Signaling Molecule	Protein Coding	57	GC07M155799	3.73639	https://www.genecards.org/cgi-bin/carddisp.pl?gene=SHH
Ulcerative colitis	MIR223	MicroRNA 223	RNA Gene	25	GC0XP066018	3.73267	https://www.genecards.org/cgi-bin/carddisp.pl?gene=MIR223
Ulcerative colitis	CLU	Clusterin	Protein Coding	54	GC08M027596	3.73204	https://www.genecards.org/cgi-bin/carddisp.pl?gene=CLU
Ulcerative colitis	RNASEH2C	Ribonuclease H2 Subunit C	Protein Coding	45	GC11M065714	3.72975	https://www.genecards.org/cgi-bin/carddisp.pl?gene=RNASEH2C
Ulcerative colitis	MXI1	MAX Interactor 1, Dimerization Protein	Protein Coding	47	GC10P110208	3.72832	https://www.genecards.org/cgi-bin/carddisp.pl?gene=MXI1
Ulcerative colitis	PHB1	Prohibitin 1	Protein Coding	53	GC17M052178	3.72698	https://www.genecards.org/cgi-bin/carddisp.pl?gene=PHB1
Ulcerative colitis	ADAR	Adenosine Deaminase RNA Specific	Protein Coding	52	GC01M154599	3.71658	https://www.genecards.org/cgi-bin/carddisp.pl?gene=ADAR
Ulcerative colitis	PARK7	Parkinsonism Associated Deglycase	Protein Coding	54	GC01P008140	3.71538	https://www.genecards.org/cgi-bin/carddisp.pl?gene=PARK7
Ulcerative colitis	USP12	Ubiquitin Specific Peptidase 12	Protein Coding	43	GC13M027066	3.70811	https://www.genecards.org/cgi-bin/carddisp.pl?gene=USP12
Ulcerative colitis	MIR3936	MicroRNA 3936	RNA Gene	16	GC05M132365	3.70345	https://www.genecards.org/cgi-bin/carddisp.pl?gene=MIR3936
Ulcerative colitis	ATF6	Activating Transcription Factor 6	Protein Coding	55	GC01P161766	3.70171	https://www.genecards.org/cgi-bin/carddisp.pl?gene=ATF6
Ulcerative colitis	RARRES2	Retinoic Acid Receptor Responder 2	Protein Coding	46	GC07M150333	3.69915	https://www.genecards.org/cgi-bin/carddisp.pl?gene=RARRES2
Ulcerative colitis	MIR122	MicroRNA 122	RNA Gene	25	GC18P058451	3.69854	https://www.genecards.org/cgi-bin/carddisp.pl?gene=MIR122
Ulcerative colitis	GUSB	Glucuronidase Beta	Protein Coding	54	GC07M065960	3.69727	https://www.genecards.org/cgi-bin/carddisp.pl?gene=GUSB
Ulcerative colitis	TPPP	Tubulin Polymerization Promoting Protein	Protein Coding	46	GC05M000659	3.69403	https://www.genecards.org/cgi-bin/carddisp.pl?gene=TPPP
Ulcerative colitis	CEP72	Centrosomal Protein 72	Protein Coding	44	GC05P000612	3.69403	https://www.genecards.org/cgi-bin/carddisp.pl?gene=CEP72
Ulcerative colitis	FCGR2C	Fc Gamma Receptor IIc (Gene/Pseudogene)	Protein Coding	40	GC01P161818	3.69403	https://www.genecards.org/cgi-bin/carddisp.pl?gene=FCGR2C
Ulcerative colitis	MROH3P	Maestro Heat Like Repeat Family Member 3, Pseudogene	Pseudogene	17	GC01P200920	3.69403	https://www.genecards.org/cgi-bin/carddisp.pl?gene=MROH3P
Ulcerative colitis	TNFSF4	TNF Superfamily Member 4	Protein Coding	48	GC01M173183	3.69156	https://www.genecards.org/cgi-bin/carddisp.pl?gene=TNFSF4
Ulcerative colitis	SIGIRR	Single Ig And TIR Domain Containing	Protein Coding	47	GC11M004413	3.68976	https://www.genecards.org/cgi-bin/carddisp.pl?gene=SIGIRR
Ulcerative colitis	RORC	RAR Related Orphan Receptor C	Protein Coding	51	GC01M151806	3.68953	https://www.genecards.org/cgi-bin/carddisp.pl?gene=RORC
Ulcerative colitis	HERC2	HECT And RLD Domain Containing E3 Ubiquitin Protein Ligase 2	Protein Coding	51	GC15M028111	3.68929	https://www.genecards.org/cgi-bin/carddisp.pl?gene=HERC2
Ulcerative colitis	IL20	Interleukin 20	Protein Coding	45	GC01P206866	3.68614	https://www.genecards.org/cgi-bin/carddisp.pl?gene=IL20
Ulcerative colitis	ANTXR2	ANTXR Cell Adhesion Molecule 2	Protein Coding	52	GC04M079901	3.68232	https://www.genecards.org/cgi-bin/carddisp.pl?gene=ANTXR2
Ulcerative colitis	ANGPT1	Angiopoietin 1	Protein Coding	53	GC08M107246	3.67595	https://www.genecards.org/cgi-bin/carddisp.pl?gene=ANGPT1
Ulcerative colitis	DLL4	Delta Like Canonical Notch Ligand 4	Protein Coding	54	GC15P040929	3.67489	https://www.genecards.org/cgi-bin/carddisp.pl?gene=DLL4
Ulcerative colitis	CREB1	CAMP Responsive Element Binding Protein 1	Protein Coding	56	GC02P207529	3.67441	https://www.genecards.org/cgi-bin/carddisp.pl?gene=CREB1
Ulcerative colitis	NEAT1	Nuclear Paraspeckle Assembly Transcript 1	RNA Gene	28	GC11P070859	3.67398	https://www.genecards.org/cgi-bin/carddisp.pl?gene=NEAT1
Ulcerative colitis	LYST	Lysosomal Trafficking Regulator	Protein Coding	45	GC01M235661	3.67337	https://www.genecards.org/cgi-bin/carddisp.pl?gene=LYST
Ulcerative colitis	MIR125B1	MicroRNA 125b-1	RNA Gene	24	GC11M122100	3.6673	https://www.genecards.org/cgi-bin/carddisp.pl?gene=MIR125B1
Ulcerative colitis	MIR106B	MicroRNA 106b	RNA Gene	24	GC07M102261	3.66641	https://www.genecards.org/cgi-bin/carddisp.pl?gene=MIR106B
Ulcerative colitis	SAA1	Serum Amyloid A1	Protein Coding	46	GC11P018579	3.66441	https://www.genecards.org/cgi-bin/carddisp.pl?gene=SAA1
Ulcerative colitis	HSD11B1	Hydroxysteroid 11-Beta Dehydrogenase 1	Protein Coding	58	GC01P209686	3.66354	https://www.genecards.org/cgi-bin/carddisp.pl?gene=HSD11B1
Ulcerative colitis	HMGB2	High Mobility Group Box 2	Protein Coding	49	GC04M173331	3.66156	https://www.genecards.org/cgi-bin/carddisp.pl?gene=HMGB2
Ulcerative colitis	HSPB1	Heat Shock Protein Family B (Small) Member 1	Protein Coding	59	GC07P076302	3.65365	https://www.genecards.org/cgi-bin/carddisp.pl?gene=HSPB1
Ulcerative colitis	DNMT3B	DNA Methyltransferase 3 Beta	Protein Coding	57	GC20P032762	3.65019	https://www.genecards.org/cgi-bin/carddisp.pl?gene=DNMT3B
Ulcerative colitis	BTK	Bruton Tyrosine Kinase	Protein Coding	60	GC0XM101349	3.6427	https://www.genecards.org/cgi-bin/carddisp.pl?gene=BTK
Ulcerative colitis	BBC3	BCL2 Binding Component 3	Protein Coding	47	GC19M047220	3.64009	https://www.genecards.org/cgi-bin/carddisp.pl?gene=BBC3
Ulcerative colitis	CCL21	C-C Motif Chemokine Ligand 21	Protein Coding	48	GC09M034709	3.62882	https://www.genecards.org/cgi-bin/carddisp.pl?gene=CCL21
Ulcerative colitis	LITAF	Lipopolysaccharide Induced TNF Factor	Protein Coding	50	GC16M011547	3.62616	https://www.genecards.org/cgi-bin/carddisp.pl?gene=LITAF
Ulcerative colitis	DES	Desmin	Protein Coding	55	GC02P219418	3.62598	https://www.genecards.org/cgi-bin/carddisp.pl?gene=DES
Ulcerative colitis	FCAR	Fc Alpha Receptor	Protein Coding	47	GC19P073506	3.61711	https://www.genecards.org/cgi-bin/carddisp.pl?gene=FCAR
Ulcerative colitis	GNA12	G Protein Subunit Alpha 12	Protein Coding	46	GC07M002728	3.6154	https://www.genecards.org/cgi-bin/carddisp.pl?gene=GNA12
Ulcerative colitis	DAP	Death Associated Protein	Protein Coding	44	GC05M010679	3.6154	https://www.genecards.org/cgi-bin/carddisp.pl?gene=DAP
Ulcerative colitis	GATD3	Glutamine Amidotransferase Class 1 Domain Containing 3	Protein Coding	40	GC21P044135	3.6154	https://www.genecards.org/cgi-bin/carddisp.pl?gene=GATD3
Ulcerative colitis	NXPE1	Neurexophilin And PC-Esterase Domain Family Member 1	Protein Coding	38	GC11M114521	3.6154	https://www.genecards.org/cgi-bin/carddisp.pl?gene=NXPE1
Ulcerative colitis	SLAMF1	Signaling Lymphocytic Activation Molecule Family Member 1	Protein Coding	49	GC01M160608	3.61097	https://www.genecards.org/cgi-bin/carddisp.pl?gene=SLAMF1
Ulcerative colitis	ING1	Inhibitor Of Growth Family Member 1	Protein Coding	50	GC13P110712	3.60817	https://www.genecards.org/cgi-bin/carddisp.pl?gene=ING1
Ulcerative colitis	EZH2	Enhancer Of Zeste 2 Polycomb Repressive Complex 2 Subunit	Protein Coding	60	GC07M148807	3.60637	https://www.genecards.org/cgi-bin/carddisp.pl?gene=EZH2
Ulcerative colitis	VIPR1	Vasoactive Intestinal Peptide Receptor 1	Protein Coding	52	GC03P042490	3.60273	https://www.genecards.org/cgi-bin/carddisp.pl?gene=VIPR1
Ulcerative colitis	TNFRSF9	TNF Receptor Superfamily Member 9	Protein Coding	50	GC01M007915	3.5991	https://www.genecards.org/cgi-bin/carddisp.pl?gene=TNFRSF9
Ulcerative colitis	SLC15A1	Solute Carrier Family 15 Member 1	Protein Coding	50	GC13M098683	3.59725	https://www.genecards.org/cgi-bin/carddisp.pl?gene=SLC15A1
Ulcerative colitis	ALDH1A1	Aldehyde Dehydrogenase 1 Family Member A1	Protein Coding	54	GC09M072900	3.59708	https://www.genecards.org/cgi-bin/carddisp.pl?gene=ALDH1A1
Ulcerative colitis	ANXA1	Annexin A1	Protein Coding	54	GC09P073151	3.59614	https://www.genecards.org/cgi-bin/carddisp.pl?gene=ANXA1
Ulcerative colitis	MIR144	MicroRNA 144	RNA Gene	21	GC17M051196	3.59152	https://www.genecards.org/cgi-bin/carddisp.pl?gene=MIR144
Ulcerative colitis	CLDN3	Claudin 3	Protein Coding	47	GC07M073768	3.58614	https://www.genecards.org/cgi-bin/carddisp.pl?gene=CLDN3
Ulcerative colitis	MIR590	MicroRNA 590	RNA Gene	22	GC07P074191	3.58469	https://www.genecards.org/cgi-bin/carddisp.pl?gene=MIR590
Ulcerative colitis	PKM	Pyruvate Kinase M1/2	Protein Coding	56	GC15M072199	3.58444	https://www.genecards.org/cgi-bin/carddisp.pl?gene=PKM
Ulcerative colitis	APEX1	Apurinic/Apyrimidinic Endodeoxyribonuclease 1	Protein Coding	52	GC14P020455	3.57462	https://www.genecards.org/cgi-bin/carddisp.pl?gene=APEX1
Ulcerative colitis	GTF2I	General Transcription Factor IIi	Protein Coding	47	GC07P076418	3.57187	https://www.genecards.org/cgi-bin/carddisp.pl?gene=GTF2I
Ulcerative colitis	NRIP1	Nuclear Receptor Interacting Protein 1	Protein Coding	50	GC21M014961	3.56907	https://www.genecards.org/cgi-bin/carddisp.pl?gene=NRIP1
Ulcerative colitis	MIR93	MicroRNA 93	RNA Gene	24	GC07M102257	3.56114	https://www.genecards.org/cgi-bin/carddisp.pl?gene=MIR93
Ulcerative colitis	RAB27A	RAB27A, Member RAS Oncogene Family	Protein Coding	55	GC15M055202	3.56087	https://www.genecards.org/cgi-bin/carddisp.pl?gene=RAB27A
Ulcerative colitis	TNFRSF11B	TNF Receptor Superfamily Member 11b	Protein Coding	54	GC08M118923	3.55302	https://www.genecards.org/cgi-bin/carddisp.pl?gene=TNFRSF11B
Ulcerative colitis	TCF7L2	Transcription Factor 7 Like 2	Protein Coding	53	GC10P112950	3.53718	https://www.genecards.org/cgi-bin/carddisp.pl?gene=TCF7L2
Ulcerative colitis	NOTCH3	Notch Receptor 3	Protein Coding	58	GC19M015159	3.53636	https://www.genecards.org/cgi-bin/carddisp.pl?gene=NOTCH3
Ulcerative colitis	TGFBR2	Transforming Growth Factor Beta Receptor 2	Protein Coding	59	GC03P030623	3.53625	https://www.genecards.org/cgi-bin/carddisp.pl?gene=TGFBR2
Ulcerative colitis	IL17RC	Interleukin 17 Receptor C	Protein Coding	47	GC03P009917	3.53566	https://www.genecards.org/cgi-bin/carddisp.pl?gene=IL17RC
Ulcerative colitis	SAG	S-Antigen Visual Arrestin	Protein Coding	51	GC02P233400	3.5353	https://www.genecards.org/cgi-bin/carddisp.pl?gene=SAG
Ulcerative colitis	HSPA6	Heat Shock Protein Family A (Hsp70) Member 6	Protein Coding	51	GC01P161524	3.53199	https://www.genecards.org/cgi-bin/carddisp.pl?gene=HSPA6
Ulcerative colitis	UGT1A6	UDP Glucuronosyltransferase Family 1 Member A6	Protein Coding	48	GC02P233691	3.52131	https://www.genecards.org/cgi-bin/carddisp.pl?gene=UGT1A6
Ulcerative colitis	ANXA5	Annexin A5	Protein Coding	52	GC04M121667	3.51422	https://www.genecards.org/cgi-bin/carddisp.pl?gene=ANXA5
Ulcerative colitis	TMSB4X	Thymosin Beta 4 X-Linked	Protein Coding	46	GC0XP012975	3.51378	https://www.genecards.org/cgi-bin/carddisp.pl?gene=TMSB4X
Ulcerative colitis	APEH	Acylaminoacyl-Peptide Hydrolase	Protein Coding	47	GC03P049673	3.5124	https://www.genecards.org/cgi-bin/carddisp.pl?gene=APEH
Ulcerative colitis	NLRC4	NLR Family CARD Domain Containing 4	Protein Coding	51	GC02M032224	3.50706	https://www.genecards.org/cgi-bin/carddisp.pl?gene=NLRC4
Ulcerative colitis	GSR	Glutathione-Disulfide Reductase	Protein Coding	56	GC08M030678	3.50599	https://www.genecards.org/cgi-bin/carddisp.pl?gene=GSR
Ulcerative colitis	PTPRS	Protein Tyrosine Phosphatase Receptor Type S	Protein Coding	52	GC19M006881	3.49741	https://www.genecards.org/cgi-bin/carddisp.pl?gene=PTPRS
Ulcerative colitis	C1S	Complement C1s	Protein Coding	54	GC12P023568	3.48643	https://www.genecards.org/cgi-bin/carddisp.pl?gene=C1S
Ulcerative colitis	INSL4	Insulin Like 4	Protein Coding	39	GC09P005231	3.48212	https://www.genecards.org/cgi-bin/carddisp.pl?gene=INSL4
Ulcerative colitis	HSF2	Heat Shock Transcription Factor 2	Protein Coding	50	GC06P122399	3.48163	https://www.genecards.org/cgi-bin/carddisp.pl?gene=HSF2
Ulcerative colitis	G6PD	Glucose-6-Phosphate Dehydrogenase	Protein Coding	57	GC0XM154562	3.47427	https://www.genecards.org/cgi-bin/carddisp.pl?gene=G6PD
Ulcerative colitis	F2R	Coagulation Factor II Thrombin Receptor	Protein Coding	53	GC05P076716	3.46833	https://www.genecards.org/cgi-bin/carddisp.pl?gene=F2R
Ulcerative colitis	GAPDH	Glyceraldehyde-3-Phosphate Dehydrogenase	Protein Coding	57	GC12P023539	3.46794	https://www.genecards.org/cgi-bin/carddisp.pl?gene=GAPDH
Ulcerative colitis	IL15RA	Interleukin 15 Receptor Subunit Alpha	Protein Coding	47	GC10M005943	3.4573	https://www.genecards.org/cgi-bin/carddisp.pl?gene=IL15RA
Ulcerative colitis	BLK	BLK Proto-Oncogene, Src Family Tyrosine Kinase	Protein Coding	56	GC08P011486	3.45483	https://www.genecards.org/cgi-bin/carddisp.pl?gene=BLK
Ulcerative colitis	GPR12	G Protein-Coupled Receptor 12	Protein Coding	45	GC13M026755	3.45029	https://www.genecards.org/cgi-bin/carddisp.pl?gene=GPR12
Ulcerative colitis	ALDH2	Aldehyde Dehydrogenase 2 Family Member	Protein Coding	57	GC12P111766	3.44772	https://www.genecards.org/cgi-bin/carddisp.pl?gene=ALDH2
Ulcerative colitis	EHMT2	Euchromatic Histone Lysine Methyltransferase 2	Protein Coding	52	GC06M031879	3.44722	https://www.genecards.org/cgi-bin/carddisp.pl?gene=EHMT2
Ulcerative colitis	FYN	FYN Proto-Oncogene, Src Family Tyrosine Kinase	Protein Coding	53	GC06M111660	3.44566	https://www.genecards.org/cgi-bin/carddisp.pl?gene=FYN
Ulcerative colitis	CLDN7	Claudin 7	Protein Coding	46	GC17M007259	3.44246	https://www.genecards.org/cgi-bin/carddisp.pl?gene=CLDN7
Ulcerative colitis	RB1	RB Transcriptional Corepressor 1	Protein Coding	55	GC13P048303	3.44163	https://www.genecards.org/cgi-bin/carddisp.pl?gene=RB1
Ulcerative colitis	PTCH1	Patched 1	Protein Coding	57	GC09M095442	3.43825	https://www.genecards.org/cgi-bin/carddisp.pl?gene=PTCH1
Ulcerative colitis	GPSM3	G Protein Signaling Modulator 3	Protein Coding	40	GC06M071754	3.4374	https://www.genecards.org/cgi-bin/carddisp.pl?gene=GPSM3
Ulcerative colitis	RHOD	Ras Homolog Family Member D	Protein Coding	43	GC11P071007	3.43492	https://www.genecards.org/cgi-bin/carddisp.pl?gene=RHOD
Ulcerative colitis	CCNA2	Cyclin A2	Protein Coding	52	GC04M121816	3.4343	https://www.genecards.org/cgi-bin/carddisp.pl?gene=CCNA2
Ulcerative colitis	PARD3	Par-3 Family Cell Polarity Regulator	Protein Coding	47	GC10M034110	3.43373	https://www.genecards.org/cgi-bin/carddisp.pl?gene=PARD3
Ulcerative colitis	HOXA13	Homeobox A13	Protein Coding	48	GC07M027674	3.43331	https://www.genecards.org/cgi-bin/carddisp.pl?gene=HOXA13
Ulcerative colitis	MLXIPL	MLX Interacting Protein Like	Protein Coding	50	GC07M073593	3.42922	https://www.genecards.org/cgi-bin/carddisp.pl?gene=MLXIPL
Ulcerative colitis	TLR1	Toll Like Receptor 1	Protein Coding	55	GC04M038793	3.42644	https://www.genecards.org/cgi-bin/carddisp.pl?gene=TLR1
Ulcerative colitis	EGR1	Early Growth Response 1	Protein Coding	52	GC05P138465	3.42509	https://www.genecards.org/cgi-bin/carddisp.pl?gene=EGR1
Ulcerative colitis	TNPO3	Transportin 3	Protein Coding	48	GC07M128954	3.42459	https://www.genecards.org/cgi-bin/carddisp.pl?gene=TNPO3
Ulcerative colitis	MAPK8	Mitogen-Activated Protein Kinase 8	Protein Coding	57	GC10P048306	3.42172	https://www.genecards.org/cgi-bin/carddisp.pl?gene=MAPK8
Ulcerative colitis	NKX3-1	NK3 Homeobox 1	Protein Coding	47	GC08M023678	3.41664	https://www.genecards.org/cgi-bin/carddisp.pl?gene=NKX3-1
Ulcerative colitis	LIF	LIF Interleukin 6 Family Cytokine	Protein Coding	50	GC22M030240	3.4143	https://www.genecards.org/cgi-bin/carddisp.pl?gene=LIF
Ulcerative colitis	HPSE	Heparanase	Protein Coding	52	GC04M083292	3.41406	https://www.genecards.org/cgi-bin/carddisp.pl?gene=HPSE
Ulcerative colitis	FLT1	Fms Related Receptor Tyrosine Kinase 1	Protein Coding	57	GC13M028300	3.40577	https://www.genecards.org/cgi-bin/carddisp.pl?gene=FLT1
Ulcerative colitis	SMARCB1	SWI/SNF Related, Matrix Associated, Actin Dependent Regulator Of Chromatin, Subfamily B, Member 1	Protein Coding	53	GC22P023786	3.39529	https://www.genecards.org/cgi-bin/carddisp.pl?gene=SMARCB1
Ulcerative colitis	SMURF1	SMAD Specific E3 Ubiquitin Protein Ligase 1	Protein Coding	52	GC07M099027	3.38743	https://www.genecards.org/cgi-bin/carddisp.pl?gene=SMURF1
Ulcerative colitis	IL18R1	Interleukin 18 Receptor 1	Protein Coding	50	GC02P102311	3.38743	https://www.genecards.org/cgi-bin/carddisp.pl?gene=IL18R1
Ulcerative colitis	DPP4	Dipeptidyl Peptidase 4	Protein Coding	57	GC02M161992	3.38536	https://www.genecards.org/cgi-bin/carddisp.pl?gene=DPP4
Ulcerative colitis	TNFRSF10A	TNF Receptor Superfamily Member 10a	Protein Coding	52	GC08M023190	3.3774	https://www.genecards.org/cgi-bin/carddisp.pl?gene=TNFRSF10A
Ulcerative colitis	DSP	Desmoplakin	Protein Coding	57	GC06P007541	3.3743	https://www.genecards.org/cgi-bin/carddisp.pl?gene=DSP
Ulcerative colitis	ZMIZ1	Zinc Finger MIZ-Type Containing 1	Protein Coding	49	GC10P079068	3.37223	https://www.genecards.org/cgi-bin/carddisp.pl?gene=ZMIZ1
Ulcerative colitis	GUCY2C	Guanylate Cyclase 2C	Protein Coding	52	GC12M014612	3.37129	https://www.genecards.org/cgi-bin/carddisp.pl?gene=GUCY2C
Ulcerative colitis	AQP4	Aquaporin 4	Protein Coding	53	GC18M026852	3.36358	https://www.genecards.org/cgi-bin/carddisp.pl?gene=AQP4
Ulcerative colitis	CRH	Corticotropin Releasing Hormone	Protein Coding	50	GC08M066176	3.36279	https://www.genecards.org/cgi-bin/carddisp.pl?gene=CRH
Ulcerative colitis	S100B	S100 Calcium Binding Protein B	Protein Coding	51	GC21M051379	3.35821	https://www.genecards.org/cgi-bin/carddisp.pl?gene=S100B
Ulcerative colitis	CLDN8	Claudin 8	Protein Coding	41	GC21M030214	3.35595	https://www.genecards.org/cgi-bin/carddisp.pl?gene=CLDN8
Ulcerative colitis	LEPR	Leptin Receptor	Protein Coding	57	GC01P065421	3.35027	https://www.genecards.org/cgi-bin/carddisp.pl?gene=LEPR
Ulcerative colitis	IFNB1	Interferon Beta 1	Protein Coding	50	GC09M021077	3.3465	https://www.genecards.org/cgi-bin/carddisp.pl?gene=IFNB1
Ulcerative colitis	ABCC2	ATP Binding Cassette Subfamily C Member 2	Protein Coding	55	GC10P099782	3.34598	https://www.genecards.org/cgi-bin/carddisp.pl?gene=ABCC2
Ulcerative colitis	SERPINA4	Serpin Family A Member 4	Protein Coding	48	GC14P094561	3.34285	https://www.genecards.org/cgi-bin/carddisp.pl?gene=SERPINA4
Ulcerative colitis	GJB6	Gap Junction Protein Beta 6	Protein Coding	49	GC13M020221	3.342	https://www.genecards.org/cgi-bin/carddisp.pl?gene=GJB6
Ulcerative colitis	MYH11	Myosin Heavy Chain 11	Protein Coding	52	GC16M015921	3.34009	https://www.genecards.org/cgi-bin/carddisp.pl?gene=MYH11
Ulcerative colitis	DDR1	Discoidin Domain Receptor Tyrosine Kinase 1	Protein Coding	53	GC06P092137	3.33758	https://www.genecards.org/cgi-bin/carddisp.pl?gene=DDR1
Ulcerative colitis	TREM1	Triggering Receptor Expressed On Myeloid Cells 1	Protein Coding	48	GC06M041267	3.32641	https://www.genecards.org/cgi-bin/carddisp.pl?gene=TREM1
Ulcerative colitis	AP3B1	Adaptor Related Protein Complex 3 Subunit Beta 1	Protein Coding	52	GC05M078000	3.3252	https://www.genecards.org/cgi-bin/carddisp.pl?gene=AP3B1
Ulcerative colitis	GP2	Glycoprotein 2	Protein Coding	46	GC16M020309	3.3177	https://www.genecards.org/cgi-bin/carddisp.pl?gene=GP2
Ulcerative colitis	TDGF1	Teratocarcinoma-Derived Growth Factor 1	Protein Coding	49	GC03P047633	3.308	https://www.genecards.org/cgi-bin/carddisp.pl?gene=TDGF1
Ulcerative colitis	NCAM1	Neural Cell Adhesion Molecule 1	Protein Coding	55	GC11P112961	3.28943	https://www.genecards.org/cgi-bin/carddisp.pl?gene=NCAM1
Ulcerative colitis	MMP12	Matrix Metallopeptidase 12	Protein Coding	53	GC11M102862	3.28772	https://www.genecards.org/cgi-bin/carddisp.pl?gene=MMP12
Ulcerative colitis	MIR200A	MicroRNA 200a	RNA Gene	23	GC01P004363	3.28574	https://www.genecards.org/cgi-bin/carddisp.pl?gene=MIR200A
Ulcerative colitis	NUP210	Nucleoporin 210	Protein Coding	48	GC03M021822	3.2833	https://www.genecards.org/cgi-bin/carddisp.pl?gene=NUP210
Ulcerative colitis	MIR15A	MicroRNA 15a	RNA Gene	18	GC13M050049	3.27573	https://www.genecards.org/cgi-bin/carddisp.pl?gene=MIR15A
Ulcerative colitis	MIR146B	MicroRNA 146b	RNA Gene	24	GC10P102436	3.27383	https://www.genecards.org/cgi-bin/carddisp.pl?gene=MIR146B
Ulcerative colitis	FHIT	Fragile Histidine Triad Diadenosine Triphosphatase	Protein Coding	51	GC03M059747	3.27075	https://www.genecards.org/cgi-bin/carddisp.pl?gene=FHIT
Ulcerative colitis	CREBBP	CREB Binding Protein	Protein Coding	60	GC16M008258	3.26936	https://www.genecards.org/cgi-bin/carddisp.pl?gene=CREBBP
Ulcerative colitis	MIR19A	MicroRNA 19a	RNA Gene	22	GC13P091579	3.26913	https://www.genecards.org/cgi-bin/carddisp.pl?gene=MIR19A
Ulcerative colitis	SI	Sucrase-Isomaltase	Protein Coding	51	GC03M164978	3.26867	https://www.genecards.org/cgi-bin/carddisp.pl?gene=SI
Ulcerative colitis	TAGLN	Transgelin	Protein Coding	50	GC11P117199	3.2604	https://www.genecards.org/cgi-bin/carddisp.pl?gene=TAGLN
Ulcerative colitis	MAPK3	Mitogen-Activated Protein Kinase 3	Protein Coding	56	GC16M038440	3.26026	https://www.genecards.org/cgi-bin/carddisp.pl?gene=MAPK3
Ulcerative colitis	SCYL1	SCY1 Like Pseudokinase 1	Protein Coding	49	GC11P065525	3.25415	https://www.genecards.org/cgi-bin/carddisp.pl?gene=SCYL1
Ulcerative colitis	PTX3	Pentraxin 3	Protein Coding	50	GC03P157436	3.25378	https://www.genecards.org/cgi-bin/carddisp.pl?gene=PTX3
Ulcerative colitis	CASP9	Caspase 9	Protein Coding	53	GC01M015491	3.25358	https://www.genecards.org/cgi-bin/carddisp.pl?gene=CASP9
Ulcerative colitis	P4HA2	Prolyl 4-Hydroxylase Subunit Alpha 2	Protein Coding	52	GC05M132193	3.24939	https://www.genecards.org/cgi-bin/carddisp.pl?gene=P4HA2
Ulcerative colitis	CDK2	Cyclin Dependent Kinase 2	Protein Coding	58	GC12P055966	3.24706	https://www.genecards.org/cgi-bin/carddisp.pl?gene=CDK2
Ulcerative colitis	INPP5E	Inositol Polyphosphate-5-Phosphatase E	Protein Coding	48	GC09M136428	3.24698	https://www.genecards.org/cgi-bin/carddisp.pl?gene=INPP5E
Ulcerative colitis	LRP6	LDL Receptor Related Protein 6	Protein Coding	55	GC12M022658	3.24656	https://www.genecards.org/cgi-bin/carddisp.pl?gene=LRP6
Ulcerative colitis	C1R	Complement C1r	Protein Coding	53	GC12M007993	3.24189	https://www.genecards.org/cgi-bin/carddisp.pl?gene=C1R
Ulcerative colitis	TXN	Thioredoxin	Protein Coding	52	GC09M110243	3.24066	https://www.genecards.org/cgi-bin/carddisp.pl?gene=TXN
Ulcerative colitis	PADI4	Peptidyl Arginine Deiminase 4	Protein Coding	51	GC01P017308	3.23643	https://www.genecards.org/cgi-bin/carddisp.pl?gene=PADI4
Ulcerative colitis	SYP	Synaptophysin	Protein Coding	52	GC0XM049187	3.23364	https://www.genecards.org/cgi-bin/carddisp.pl?gene=SYP
Ulcerative colitis	MAF	MAF BZIP Transcription Factor	Protein Coding	51	GC16M079204	3.23133	https://www.genecards.org/cgi-bin/carddisp.pl?gene=MAF
Ulcerative colitis	NOTCH2	Notch Receptor 2	Protein Coding	59	GC01M119911	3.23089	https://www.genecards.org/cgi-bin/carddisp.pl?gene=NOTCH2
Ulcerative colitis	TRPV4	Transient Receptor Potential Cation Channel Subfamily V Member 4	Protein Coding	56	GC12M109783	3.22972	https://www.genecards.org/cgi-bin/carddisp.pl?gene=TRPV4
Ulcerative colitis	UBE2L3	Ubiquitin Conjugating Enzyme E2 L3	Protein Coding	51	GC22P021549	3.22746	https://www.genecards.org/cgi-bin/carddisp.pl?gene=UBE2L3
Ulcerative colitis	JAZF1	JAZF Zinc Finger 1	Protein Coding	44	GC07M027830	3.22746	https://www.genecards.org/cgi-bin/carddisp.pl?gene=JAZF1
Ulcerative colitis	IL9	Interleukin 9	Protein Coding	50	GC05M135891	3.2262	https://www.genecards.org/cgi-bin/carddisp.pl?gene=IL9
Ulcerative colitis	RECQL4	RecQ Like Helicase 4	Protein Coding	47	GC08M145607	3.22416	https://www.genecards.org/cgi-bin/carddisp.pl?gene=RECQL4
Ulcerative colitis	SETD2	SET Domain Containing 2, Histone Lysine Methyltransferase	Protein Coding	53	GC03M047033	3.2193	https://www.genecards.org/cgi-bin/carddisp.pl?gene=SETD2
Ulcerative colitis	ITLN1	Intelectin 1	Protein Coding	46	GC01M160876	3.21264	https://www.genecards.org/cgi-bin/carddisp.pl?gene=ITLN1
Ulcerative colitis	BSG	Basigin (Ok Blood Group)	Protein Coding	51	GC19P000571	3.18744	https://www.genecards.org/cgi-bin/carddisp.pl?gene=BSG
Ulcerative colitis	PROCR	Protein C Receptor	Protein Coding	49	GC20P035171	3.18536	https://www.genecards.org/cgi-bin/carddisp.pl?gene=PROCR
Ulcerative colitis	ERN1	Endoplasmic Reticulum To Nucleus Signaling 1	Protein Coding	53	GC17M064039	3.18184	https://www.genecards.org/cgi-bin/carddisp.pl?gene=ERN1
Ulcerative colitis	STX2	Syntaxin 2	Protein Coding	44	GC12M130789	3.17467	https://www.genecards.org/cgi-bin/carddisp.pl?gene=STX2
Ulcerative colitis	NOS1	Nitric Oxide Synthase 1	Protein Coding	56	GC12M117208	3.17183	https://www.genecards.org/cgi-bin/carddisp.pl?gene=NOS1
Ulcerative colitis	SULT1A1	Sulfotransferase Family 1A Member 1	Protein Coding	50	GC16M038249	3.15848	https://www.genecards.org/cgi-bin/carddisp.pl?gene=SULT1A1
Ulcerative colitis	SIRT1	Sirtuin 1	Protein Coding	56	GC10P067884	3.15361	https://www.genecards.org/cgi-bin/carddisp.pl?gene=SIRT1
Ulcerative colitis	AGR2	Anterior Gradient 2, Protein Disulphide Isomerase Family Member	Protein Coding	46	GC07M017120	3.14877	https://www.genecards.org/cgi-bin/carddisp.pl?gene=AGR2
Ulcerative colitis	MDM2	MDM2 Proto-Oncogene	Protein Coding	59	GC12P068808	3.14815	https://www.genecards.org/cgi-bin/carddisp.pl?gene=MDM2
Ulcerative colitis	MME	Membrane Metalloendopeptidase	Protein Coding	57	GC03P155024	3.1457	https://www.genecards.org/cgi-bin/carddisp.pl?gene=MME
Ulcerative colitis	UCN2	Urocortin 2	Protein Coding	39	GC03M048561	3.14238	https://www.genecards.org/cgi-bin/carddisp.pl?gene=UCN2
Ulcerative colitis	LST1	Leukocyte Specific Transcript 1	Protein Coding	42	GC06P092155	3.14123	https://www.genecards.org/cgi-bin/carddisp.pl?gene=LST1
Ulcerative colitis	SLC40A1	Solute Carrier Family 40 Member 1	Protein Coding	53	GC02M189560	3.14115	https://www.genecards.org/cgi-bin/carddisp.pl?gene=SLC40A1
Ulcerative colitis	AQP5	Aquaporin 5	Protein Coding	53	GC12P049961	3.14067	https://www.genecards.org/cgi-bin/carddisp.pl?gene=AQP5
Ulcerative colitis	CD163	CD163 Molecule	Protein Coding	51	GC12M008027	3.14057	https://www.genecards.org/cgi-bin/carddisp.pl?gene=CD163
Ulcerative colitis	CTC1	CST Telomere Replication Complex Component 1	Protein Coding	42	GC17M011067	3.13942	https://www.genecards.org/cgi-bin/carddisp.pl?gene=CTC1
Ulcerative colitis	CYCS	Cytochrome C, Somatic	Protein Coding	55	GC07M025118	3.13932	https://www.genecards.org/cgi-bin/carddisp.pl?gene=CYCS
Ulcerative colitis	CAVIN1	Caveolae Associated Protein 1	Protein Coding	48	GC17M051790	3.13925	https://www.genecards.org/cgi-bin/carddisp.pl?gene=CAVIN1
Ulcerative colitis	PRRC2A	Proline Rich Coiled-Coil 2A	Protein Coding	42	GC06P092156	3.13925	https://www.genecards.org/cgi-bin/carddisp.pl?gene=PRRC2A
Ulcerative colitis	KPNA7	Karyopherin Subunit Alpha 7	Protein Coding	38	GC07M099173	3.13925	https://www.genecards.org/cgi-bin/carddisp.pl?gene=KPNA7
Ulcerative colitis	ANGPTL4	Angiopoietin Like 4	Protein Coding	52	GC19P008363	3.13286	https://www.genecards.org/cgi-bin/carddisp.pl?gene=ANGPTL4
Ulcerative colitis	PTGER2	Prostaglandin E Receptor 2	Protein Coding	55	GC14P052314	3.13212	https://www.genecards.org/cgi-bin/carddisp.pl?gene=PTGER2
Ulcerative colitis	IFITM3	Interferon Induced Transmembrane Protein 3	Protein Coding	48	GC11M000319	3.12846	https://www.genecards.org/cgi-bin/carddisp.pl?gene=IFITM3
Ulcerative colitis	RPL39P28	Ribosomal Protein L39 Pseudogene 28	Pseudogene	10	GC12M068001	3.12846	https://www.genecards.org/cgi-bin/carddisp.pl?gene=RPL39P28
Ulcerative colitis	PPARA	Peroxisome Proliferator Activated Receptor Alpha	Protein Coding	51	GC22P046150	3.1164	https://www.genecards.org/cgi-bin/carddisp.pl?gene=PPARA
Ulcerative colitis	HPRT1	Hypoxanthine Phosphoribosyltransferase 1	Protein Coding	55	GC0XP134460	3.11331	https://www.genecards.org/cgi-bin/carddisp.pl?gene=HPRT1
Ulcerative colitis	DAPK1	Death Associated Protein Kinase 1	Protein Coding	56	GC09P087497	3.11073	https://www.genecards.org/cgi-bin/carddisp.pl?gene=DAPK1
Ulcerative colitis	NTS	Neurotensin	Protein Coding	48	GC12P085876	3.10939	https://www.genecards.org/cgi-bin/carddisp.pl?gene=NTS
Ulcerative colitis	TYMP	Thymidine Phosphorylase	Protein Coding	54	GC22M050525	3.10633	https://www.genecards.org/cgi-bin/carddisp.pl?gene=TYMP
Ulcerative colitis	IL6-AS1	IL6 Antisense RNA 1	RNA Gene	18	GC07M022728	3.10045	https://www.genecards.org/cgi-bin/carddisp.pl?gene=IL6-AS1
Ulcerative colitis	LAMB3	Laminin Subunit Beta 3	Protein Coding	52	GC01M209614	3.09879	https://www.genecards.org/cgi-bin/carddisp.pl?gene=LAMB3
Ulcerative colitis	MIR204	MicroRNA 204	RNA Gene	26	GC09M070809	3.09708	https://www.genecards.org/cgi-bin/carddisp.pl?gene=MIR204
Ulcerative colitis	MIR20A	MicroRNA 20a	RNA Gene	22	GC13P091580	3.09552	https://www.genecards.org/cgi-bin/carddisp.pl?gene=MIR20A
Ulcerative colitis	SMARCA4	SWI/SNF Related, Matrix Associated, Actin Dependent Regulator Of Chromatin, Subfamily A, Member 4	Protein Coding	57	GC19P010932	3.0868	https://www.genecards.org/cgi-bin/carddisp.pl?gene=SMARCA4
Ulcerative colitis	CFAP126	Cilia And Flagella Associated Protein 126	Protein Coding	34	GC01M161364	3.08108	https://www.genecards.org/cgi-bin/carddisp.pl?gene=CFAP126
Ulcerative colitis	RPS14P1	Ribosomal Protein S14 Pseudogene 1	Pseudogene	8	GC01M206695	3.07779	https://www.genecards.org/cgi-bin/carddisp.pl?gene=RPS14P1
Ulcerative colitis	CD19	CD19 Molecule	Protein Coding	58	GC16P042650	3.07762	https://www.genecards.org/cgi-bin/carddisp.pl?gene=CD19
Ulcerative colitis	GRB2	Growth Factor Receptor Bound Protein 2	Protein Coding	52	GC17M075318	3.07247	https://www.genecards.org/cgi-bin/carddisp.pl?gene=GRB2
Ulcerative colitis	TGFB3	Transforming Growth Factor Beta 3	Protein Coding	54	GC14M075958	3.07245	https://www.genecards.org/cgi-bin/carddisp.pl?gene=TGFB3
Ulcerative colitis	ERCC1	ERCC Excision Repair 1, Endonuclease Non-Catalytic Subunit	Protein Coding	52	GC19M070729	3.07086	https://www.genecards.org/cgi-bin/carddisp.pl?gene=ERCC1
Ulcerative colitis	MAGI2	Membrane Associated Guanylate Kinase, WW And PDZ Domain Containing 2	Protein Coding	50	GC07M078017	3.06885	https://www.genecards.org/cgi-bin/carddisp.pl?gene=MAGI2
Ulcerative colitis	CALR	Calreticulin	Protein Coding	58	GC19P012938	3.06766	https://www.genecards.org/cgi-bin/carddisp.pl?gene=CALR
Ulcerative colitis	CD1A	CD1a Molecule	Protein Coding	47	GC01P158255	3.06321	https://www.genecards.org/cgi-bin/carddisp.pl?gene=CD1A
Ulcerative colitis	TRA	T Cell Receptor Alpha Locus	Protein Coding	24	GC14P021621	3.06209	https://www.genecards.org/cgi-bin/carddisp.pl?gene=TRA
Ulcerative colitis	TEP1	Telomerase Associated Protein 1	Protein Coding	47	GC14M020365	3.06027	https://www.genecards.org/cgi-bin/carddisp.pl?gene=TEP1
Ulcerative colitis	CDK4	Cyclin Dependent Kinase 4	Protein Coding	61	GC12M057787	3.05993	https://www.genecards.org/cgi-bin/carddisp.pl?gene=CDK4
Ulcerative colitis	MGAT5	Alpha-1,6-Mannosylglycoprotein 6-Beta-N-Acetylglucosaminyltransferase	Protein Coding	48	GC02P134119	3.05811	https://www.genecards.org/cgi-bin/carddisp.pl?gene=MGAT5
Ulcerative colitis	NORAD	Non-Coding RNA Activated By DNA Damage	RNA Gene	20	GC20M036294	3.05811	https://www.genecards.org/cgi-bin/carddisp.pl?gene=NORAD
Ulcerative colitis	TNFRSF8	TNF Receptor Superfamily Member 8	Protein Coding	50	GC01P012063	3.05718	https://www.genecards.org/cgi-bin/carddisp.pl?gene=TNFRSF8
Ulcerative colitis	MDH2	Malate Dehydrogenase 2	Protein Coding	55	GC07P076048	3.05523	https://www.genecards.org/cgi-bin/carddisp.pl?gene=MDH2
Ulcerative colitis	REG3A	Regenerating Family Member 3 Alpha	Protein Coding	44	GC02M079157	3.05261	https://www.genecards.org/cgi-bin/carddisp.pl?gene=REG3A
Ulcerative colitis	LPL	Lipoprotein Lipase	Protein Coding	56	GC08P019901	3.05198	https://www.genecards.org/cgi-bin/carddisp.pl?gene=LPL
Ulcerative colitis	U2AF1	U2 Small Nuclear RNA Auxiliary Factor 1	Protein Coding	50	GC21M043092	3.04688	https://www.genecards.org/cgi-bin/carddisp.pl?gene=U2AF1
Ulcerative colitis	MB	Myoglobin	Protein Coding	50	GC22M035606	3.0462	https://www.genecards.org/cgi-bin/carddisp.pl?gene=MB
Ulcerative colitis	IL12RB1	Interleukin 12 Receptor Subunit Beta 1	Protein Coding	52	GC19M018058	3.04559	https://www.genecards.org/cgi-bin/carddisp.pl?gene=IL12RB1
Ulcerative colitis	EPHX1	Epoxide Hydrolase 1	Protein Coding	52	GC01P225810	3.0404	https://www.genecards.org/cgi-bin/carddisp.pl?gene=EPHX1
Ulcerative colitis	TLR6	Toll Like Receptor 6	Protein Coding	51	GC04M038828	3.03826	https://www.genecards.org/cgi-bin/carddisp.pl?gene=TLR6
Ulcerative colitis	IL24	Interleukin 24	Protein Coding	48	GC01P206897	3.03798	https://www.genecards.org/cgi-bin/carddisp.pl?gene=IL24
Ulcerative colitis	GMPPB	GDP-Mannose Pyrophosphorylase B	Protein Coding	50	GC03M049716	3.03174	https://www.genecards.org/cgi-bin/carddisp.pl?gene=GMPPB
Ulcerative colitis	UBA7	Ubiquitin Like Modifier Activating Enzyme 7	Protein Coding	48	GC03M049805	3.03174	https://www.genecards.org/cgi-bin/carddisp.pl?gene=UBA7
Ulcerative colitis	AMIGO3	Adhesion Molecule With Ig Like Domain 3	Protein Coding	36	GC03M051575	3.03174	https://www.genecards.org/cgi-bin/carddisp.pl?gene=AMIGO3
Ulcerative colitis	LOC110806262	Solute Carrier Family 6 Member 4 Gene Promoter	Functional Element	3	GC17P030235	3.03133	https://www.genecards.org/cgi-bin/carddisp.pl?gene=LOC110806262
Ulcerative colitis	ZGPAT	Zinc Finger CCCH-Type And G-Patch Domain Containing	Protein Coding	43	GC20P063707	3.02981	https://www.genecards.org/cgi-bin/carddisp.pl?gene=ZGPAT
Ulcerative colitis	FFAR2	Free Fatty Acid Receptor 2	Protein Coding	48	GC19P072731	3.02522	https://www.genecards.org/cgi-bin/carddisp.pl?gene=FFAR2
Ulcerative colitis	H2AX	H2A.X Variant Histone	Protein Coding	50	GC11M119285	3.02284	https://www.genecards.org/cgi-bin/carddisp.pl?gene=H2AX
Ulcerative colitis	ACHE	Acetylcholinesterase (Cartwright Blood Group)	Protein Coding	53	GC07M100889	3.01324	https://www.genecards.org/cgi-bin/carddisp.pl?gene=ACHE
Ulcerative colitis	PPM1L	Protein Phosphatase, Mg2+/Mn2+ Dependent 1L	Protein Coding	44	GC03P160755	3.01297	https://www.genecards.org/cgi-bin/carddisp.pl?gene=PPM1L
Ulcerative colitis	FADD	Fas Associated Via Death Domain	Protein Coding	52	GC11P070203	3.01243	https://www.genecards.org/cgi-bin/carddisp.pl?gene=FADD
Ulcerative colitis	ALOX12	Arachidonate 12-Lipoxygenase, 12S Type	Protein Coding	51	GC17P006995	3.01098	https://www.genecards.org/cgi-bin/carddisp.pl?gene=ALOX12
Ulcerative colitis	LTB	Lymphotoxin Beta	Protein Coding	47	GC06M071727	3.01006	https://www.genecards.org/cgi-bin/carddisp.pl?gene=LTB
Ulcerative colitis	UGT1A1	UDP Glucuronosyltransferase Family 1 Member A1	Protein Coding	57	GC02P233760	3.00585	https://www.genecards.org/cgi-bin/carddisp.pl?gene=UGT1A1
Ulcerative colitis	SERPINH1	Serpin Family H Member 1	Protein Coding	53	GC11P075562	3.00461	https://www.genecards.org/cgi-bin/carddisp.pl?gene=SERPINH1
Ulcerative colitis	KRT15	Keratin 15	Protein Coding	44	GC17M041513	3.00146	https://www.genecards.org/cgi-bin/carddisp.pl?gene=KRT15
Ulcerative colitis	RETN	Resistin	Protein Coding	49	GC19P007669	2.99768	https://www.genecards.org/cgi-bin/carddisp.pl?gene=RETN
Ulcerative colitis	RAC3	Rac Family Small GTPase 3	Protein Coding	51	GC17P082031	2.99077	https://www.genecards.org/cgi-bin/carddisp.pl?gene=RAC3
Ulcerative colitis	MUC3B	Mucin 3B, Cell Surface Associated	Protein Coding	22	GC07U903146	2.987	https://www.genecards.org/cgi-bin/carddisp.pl?gene=MUC3B
Ulcerative colitis	NCF2	Neutrophil Cytosolic Factor 2	Protein Coding	54	GC01M184057	2.98676	https://www.genecards.org/cgi-bin/carddisp.pl?gene=NCF2
Ulcerative colitis	REG1A	Regenerating Family Member 1 Alpha	Protein Coding	46	GC02P079120	2.98117	https://www.genecards.org/cgi-bin/carddisp.pl?gene=REG1A
Ulcerative colitis	GTF2H4	General Transcription Factor IIH Subunit 4	Protein Coding	46	GC06P092138	2.98029	https://www.genecards.org/cgi-bin/carddisp.pl?gene=GTF2H4
Ulcerative colitis	HSPG2	Heparan Sulfate Proteoglycan 2	Protein Coding	54	GC01M021822	2.97465	https://www.genecards.org/cgi-bin/carddisp.pl?gene=HSPG2
Ulcerative colitis	XRCC5	X-Ray Repair Cross Complementing 5	Protein Coding	51	GC02P216107	2.97183	https://www.genecards.org/cgi-bin/carddisp.pl?gene=XRCC5
Ulcerative colitis	FMNL2	Formin Like 2	Protein Coding	44	GC02P152335	2.96531	https://www.genecards.org/cgi-bin/carddisp.pl?gene=FMNL2
Ulcerative colitis	MIR210	MicroRNA 210	RNA Gene	23	GC11M004426	2.96452	https://www.genecards.org/cgi-bin/carddisp.pl?gene=MIR210
Ulcerative colitis	MDK	Midkine	Protein Coding	50	GC11P046380	2.96141	https://www.genecards.org/cgi-bin/carddisp.pl?gene=MDK
Ulcerative colitis	HSP90AA1	Heat Shock Protein 90 Alpha Family Class A Member 1	Protein Coding	57	GC14M102080	2.95707	https://www.genecards.org/cgi-bin/carddisp.pl?gene=HSP90AA1
Ulcerative colitis	IKZF3	IKAROS Family Zinc Finger 3	Protein Coding	48	GC17M051680	2.95548	https://www.genecards.org/cgi-bin/carddisp.pl?gene=IKZF3
Ulcerative colitis	PLCH2	Phospholipase C Eta 2	Protein Coding	45	GC01P004427	2.95548	https://www.genecards.org/cgi-bin/carddisp.pl?gene=PLCH2
Ulcerative colitis	MMEL1	Membrane Metalloendopeptidase Like 1	Protein Coding	44	GC01M002590	2.95548	https://www.genecards.org/cgi-bin/carddisp.pl?gene=MMEL1
Ulcerative colitis	SLC2A4RG	SLC2A4 Regulator	Protein Coding	43	GC20P063739	2.95548	https://www.genecards.org/cgi-bin/carddisp.pl?gene=SLC2A4RG
Ulcerative colitis	TNFSF8	TNF Superfamily Member 8	Protein Coding	43	GC09M114893	2.95548	https://www.genecards.org/cgi-bin/carddisp.pl?gene=TNFSF8
Ulcerative colitis	ENTR1	Endosome Associated Trafficking Regulator 1	Protein Coding	39	GC09M136403	2.95548	https://www.genecards.org/cgi-bin/carddisp.pl?gene=ENTR1
Ulcerative colitis	PITX1-AS1	PITX1 Antisense RNA 1	RNA Gene	23	GC05P135036	2.95548	https://www.genecards.org/cgi-bin/carddisp.pl?gene=PITX1-AS1
Ulcerative colitis	LINC00598	Long Intergenic Non-Protein Coding RNA 598	RNA Gene	20	GC13M040114	2.95548	https://www.genecards.org/cgi-bin/carddisp.pl?gene=LINC00598
Ulcerative colitis	CYP24A1	Cytochrome P450 Family 24 Subfamily A Member 1	Protein Coding	53	GC20M054153	2.94053	https://www.genecards.org/cgi-bin/carddisp.pl?gene=CYP24A1
Ulcerative colitis	BIRC2	Baculoviral IAP Repeat Containing 2	Protein Coding	53	GC11P102347	2.93953	https://www.genecards.org/cgi-bin/carddisp.pl?gene=BIRC2
Ulcerative colitis	DNAL4	Dynein Axonemal Light Chain 4	Protein Coding	44	GC22M038778	2.92965	https://www.genecards.org/cgi-bin/carddisp.pl?gene=DNAL4
Ulcerative colitis	IDH1	Isocitrate Dehydrogenase (NADP(+)) 1	Protein Coding	60	GC02M208236	2.92648	https://www.genecards.org/cgi-bin/carddisp.pl?gene=IDH1
Ulcerative colitis	DSG3	Desmoglein 3	Protein Coding	48	GC18P031447	2.92582	https://www.genecards.org/cgi-bin/carddisp.pl?gene=DSG3
Ulcerative colitis	PLK1	Polo Like Kinase 1	Protein Coding	58	GC16P024566	2.92227	https://www.genecards.org/cgi-bin/carddisp.pl?gene=PLK1
Ulcerative colitis	MIR15B	MicroRNA 15b	RNA Gene	22	GC03P160404	2.91674	https://www.genecards.org/cgi-bin/carddisp.pl?gene=MIR15B
Ulcerative colitis	IL16	Interleukin 16	Protein Coding	48	GC15P081159	2.91581	https://www.genecards.org/cgi-bin/carddisp.pl?gene=IL16
Ulcerative colitis	TWIST1	Twist Family BHLH Transcription Factor 1	Protein Coding	52	GC07M019020	2.91377	https://www.genecards.org/cgi-bin/carddisp.pl?gene=TWIST1
Ulcerative colitis	SEC16A	SEC16 Homolog A, Endoplasmic Reticulum Export Factor	Protein Coding	43	GC09M136440	2.91362	https://www.genecards.org/cgi-bin/carddisp.pl?gene=SEC16A
Ulcerative colitis	MIR148A	MicroRNA 148a	RNA Gene	22	GC07M025950	2.9111	https://www.genecards.org/cgi-bin/carddisp.pl?gene=MIR148A
Ulcerative colitis	PERP	P53 Apoptosis Effector Related To PMP22	Protein Coding	47	GC06M138088	2.90966	https://www.genecards.org/cgi-bin/carddisp.pl?gene=PERP
Ulcerative colitis	SARM1	Sterile Alpha And TIR Motif Containing 1	Protein Coding	48	GC17P028364	2.90045	https://www.genecards.org/cgi-bin/carddisp.pl?gene=SARM1
Ulcerative colitis	FGFR1	Fibroblast Growth Factor Receptor 1	Protein Coding	63	GC08M038400	2.89956	https://www.genecards.org/cgi-bin/carddisp.pl?gene=FGFR1
Ulcerative colitis	GZMA	Granzyme A	Protein Coding	50	GC05P055102	2.89287	https://www.genecards.org/cgi-bin/carddisp.pl?gene=GZMA
Ulcerative colitis	MSH5	MutS Homolog 5	Protein Coding	47	GC06P092167	2.89019	https://www.genecards.org/cgi-bin/carddisp.pl?gene=MSH5
Ulcerative colitis	MIR19B1	MicroRNA 19b-1	RNA Gene	20	GC13P091575	2.88837	https://www.genecards.org/cgi-bin/carddisp.pl?gene=MIR19B1
Ulcerative colitis	EPN3	Epsin 3	Protein Coding	43	GC17P050532	2.88819	https://www.genecards.org/cgi-bin/carddisp.pl?gene=EPN3
Ulcerative colitis	VASP	Vasodilator Stimulated Phosphoprotein	Protein Coding	50	GC19P073070	2.8879	https://www.genecards.org/cgi-bin/carddisp.pl?gene=VASP
Ulcerative colitis	KCP	Kielin Cysteine Rich BMP Regulator	Protein Coding	40	GC07M128862	2.88494	https://www.genecards.org/cgi-bin/carddisp.pl?gene=KCP
Ulcerative colitis	CCN4	Cellular Communication Network Factor 4	Protein Coding	46	GC08P133192	2.88069	https://www.genecards.org/cgi-bin/carddisp.pl?gene=CCN4
Ulcerative colitis	FASN	Fatty Acid Synthase	Protein Coding	55	GC17M082078	2.88011	https://www.genecards.org/cgi-bin/carddisp.pl?gene=FASN
Ulcerative colitis	CBL	Cbl Proto-Oncogene	Protein Coding	59	GC11P119206	2.87958	https://www.genecards.org/cgi-bin/carddisp.pl?gene=CBL
Ulcerative colitis	ID2	Inhibitor Of DNA Binding 2	Protein Coding	50	GC02P008678	2.87062	https://www.genecards.org/cgi-bin/carddisp.pl?gene=ID2
Ulcerative colitis	CYP21A2	Cytochrome P450 Family 21 Subfamily A Member 2	Protein Coding	51	GC06P092176	2.87022	https://www.genecards.org/cgi-bin/carddisp.pl?gene=CYP21A2
Ulcerative colitis	XBP1	X-Box Binding Protein 1	Protein Coding	52	GC22M028794	2.86995	https://www.genecards.org/cgi-bin/carddisp.pl?gene=XBP1
Ulcerative colitis	TIAL1	TIA1 Cytotoxic Granule Associated RNA Binding Protein Like 1	Protein Coding	46	GC10M119571	2.86974	https://www.genecards.org/cgi-bin/carddisp.pl?gene=TIAL1
Ulcerative colitis	USP4	Ubiquitin Specific Peptidase 4	Protein Coding	50	GC03M049277	2.86731	https://www.genecards.org/cgi-bin/carddisp.pl?gene=USP4
Ulcerative colitis	MIR106A	MicroRNA 106a	RNA Gene	21	GC0XM134339	2.865	https://www.genecards.org/cgi-bin/carddisp.pl?gene=MIR106A
Ulcerative colitis	LIFR	LIF Receptor Subunit Alpha	Protein Coding	53	GC05M038475	2.86462	https://www.genecards.org/cgi-bin/carddisp.pl?gene=LIFR
Ulcerative colitis	MIR124-1	MicroRNA 124-1	RNA Gene	22	GC08M009903	2.86122	https://www.genecards.org/cgi-bin/carddisp.pl?gene=MIR124-1
Ulcerative colitis	SLC19A1	Solute Carrier Family 19 Member 1	Protein Coding	52	GC21M045493	2.85759	https://www.genecards.org/cgi-bin/carddisp.pl?gene=SLC19A1
Ulcerative colitis	UBE4A	Ubiquitination Factor E4A	Protein Coding	47	GC11P118359	2.85295	https://www.genecards.org/cgi-bin/carddisp.pl?gene=UBE4A
Ulcerative colitis	PRDM1	PR/SET Domain 1	Protein Coding	51	GC06P105993	2.84815	https://www.genecards.org/cgi-bin/carddisp.pl?gene=PRDM1
Ulcerative colitis	AICDA	Activation Induced Cytidine Deaminase	Protein Coding	50	GC12M008602	2.8435	https://www.genecards.org/cgi-bin/carddisp.pl?gene=AICDA
Ulcerative colitis	LYRM4	LYR Motif Containing 4	Protein Coding	44	GC06M005033	2.8432	https://www.genecards.org/cgi-bin/carddisp.pl?gene=LYRM4
Ulcerative colitis	NRP1	Neuropilin 1	Protein Coding	54	GC10M033177	2.84207	https://www.genecards.org/cgi-bin/carddisp.pl?gene=NRP1
Ulcerative colitis	ANGPT2	Angiopoietin 2	Protein Coding	55	GC08M006499	2.83921	https://www.genecards.org/cgi-bin/carddisp.pl?gene=ANGPT2
Ulcerative colitis	GLP2R	Glucagon Like Peptide 2 Receptor	Protein Coding	51	GC17P009822	2.83823	https://www.genecards.org/cgi-bin/carddisp.pl?gene=GLP2R
Ulcerative colitis	MIR16-1	MicroRNA 16-1	RNA Gene	22	GC13M050048	2.834	https://www.genecards.org/cgi-bin/carddisp.pl?gene=MIR16-1
Ulcerative colitis	GDF15	Growth Differentiation Factor 15	Protein Coding	50	GC19P072428	2.83366	https://www.genecards.org/cgi-bin/carddisp.pl?gene=GDF15
Ulcerative colitis	PRKCA	Protein Kinase C Alpha	Protein Coding	57	GC17P066302	2.83352	https://www.genecards.org/cgi-bin/carddisp.pl?gene=PRKCA
Ulcerative colitis	TFAP2A	Transcription Factor AP-2 Alpha	Protein Coding	53	GC06M010393	2.83268	https://www.genecards.org/cgi-bin/carddisp.pl?gene=TFAP2A
Ulcerative colitis	FBXW2	F-Box And WD Repeat Domain Containing 2	Protein Coding	42	GC09M120751	2.83108	https://www.genecards.org/cgi-bin/carddisp.pl?gene=FBXW2
Ulcerative colitis	CYP27B1	Cytochrome P450 Family 27 Subfamily B Member 1	Protein Coding	52	GC12M057790	2.82858	https://www.genecards.org/cgi-bin/carddisp.pl?gene=CYP27B1
Ulcerative colitis	IKBKB	Inhibitor Of Nuclear Factor Kappa B Kinase Subunit Beta	Protein Coding	61	GC08P042271	2.8274	https://www.genecards.org/cgi-bin/carddisp.pl?gene=IKBKB
Ulcerative colitis	CTTN	Cortactin	Protein Coding	50	GC11P070398	2.82669	https://www.genecards.org/cgi-bin/carddisp.pl?gene=CTTN
Ulcerative colitis	CEBPB	CCAAT Enhancer Binding Protein Beta	Protein Coding	50	GC20P050190	2.82251	https://www.genecards.org/cgi-bin/carddisp.pl?gene=CEBPB
Ulcerative colitis	GPR65	G Protein-Coupled Receptor 65	Protein Coding	45	GC14P088005	2.82167	https://www.genecards.org/cgi-bin/carddisp.pl?gene=GPR65
Ulcerative colitis	HSD11B2	Hydroxysteroid 11-Beta Dehydrogenase 2	Protein Coding	52	GC16P067433	2.82154	https://www.genecards.org/cgi-bin/carddisp.pl?gene=HSD11B2
Ulcerative colitis	ELAVL1	ELAV Like RNA Binding Protein 1	Protein Coding	47	GC19M007958	2.82031	https://www.genecards.org/cgi-bin/carddisp.pl?gene=ELAVL1
Ulcerative colitis	TH	Tyrosine Hydroxylase	Protein Coding	57	GC11M002163	2.81939	https://www.genecards.org/cgi-bin/carddisp.pl?gene=TH
Ulcerative colitis	ERBB4	Erb-B2 Receptor Tyrosine Kinase 4	Protein Coding	61	GC02M211375	2.81737	https://www.genecards.org/cgi-bin/carddisp.pl?gene=ERBB4
Ulcerative colitis	MIR320A	MicroRNA 320a	RNA Gene	24	GC08M022274	2.81617	https://www.genecards.org/cgi-bin/carddisp.pl?gene=MIR320A
Ulcerative colitis	PFKFB4	6-Phosphofructo-2-Kinase/Fructose-2,6-Biphosphatase 4	Protein Coding	48	GC03M048517	2.81476	https://www.genecards.org/cgi-bin/carddisp.pl?gene=PFKFB4
Ulcerative colitis	IP6K1	Inositol Hexakisphosphate Kinase 1	Protein Coding	45	GC03M051581	2.81476	https://www.genecards.org/cgi-bin/carddisp.pl?gene=IP6K1
Ulcerative colitis	IP6K2	Inositol Hexakisphosphate Kinase 2	Protein Coding	44	GC03M048688	2.81476	https://www.genecards.org/cgi-bin/carddisp.pl?gene=IP6K2
Ulcerative colitis	MEG3	Maternally Expressed 3	RNA Gene	31	GC14P110892	2.81448	https://www.genecards.org/cgi-bin/carddisp.pl?gene=MEG3
Ulcerative colitis	ALOX15	Arachidonate 15-Lipoxygenase	Protein Coding	52	GC17M004630	2.81441	https://www.genecards.org/cgi-bin/carddisp.pl?gene=ALOX15
Ulcerative colitis	TEC	Tec Protein Tyrosine Kinase	Protein Coding	52	GC04M048177	2.81365	https://www.genecards.org/cgi-bin/carddisp.pl?gene=TEC
Ulcerative colitis	GGT1	Gamma-Glutamyltransferase 1	Protein Coding	56	GC22P024583	2.81233	https://www.genecards.org/cgi-bin/carddisp.pl?gene=GGT1
Ulcerative colitis	MIR224	MicroRNA 224	RNA Gene	19	GC0XM151958	2.81048	https://www.genecards.org/cgi-bin/carddisp.pl?gene=MIR224
Ulcerative colitis	SAA2	Serum Amyloid A2	Protein Coding	41	GC11M018238	2.80471	https://www.genecards.org/cgi-bin/carddisp.pl?gene=SAA2
Ulcerative colitis	SLC34A1	Solute Carrier Family 34 Member 1	Protein Coding	51	GC05P177664	2.80448	https://www.genecards.org/cgi-bin/carddisp.pl?gene=SLC34A1
Ulcerative colitis	KLF4	KLF Transcription Factor 4	Protein Coding	52	GC09M107484	2.79613	https://www.genecards.org/cgi-bin/carddisp.pl?gene=KLF4
Ulcerative colitis	IFNAR1	Interferon Alpha And Beta Receptor Subunit 1	Protein Coding	55	GC21P033324	2.79491	https://www.genecards.org/cgi-bin/carddisp.pl?gene=IFNAR1
Ulcerative colitis	ACKR2	Atypical Chemokine Receptor 2	Protein Coding	47	GC03P042804	2.79472	https://www.genecards.org/cgi-bin/carddisp.pl?gene=ACKR2
Ulcerative colitis	SLC5A8	Solute Carrier Family 5 Member 8	Protein Coding	49	GC12M101155	2.79398	https://www.genecards.org/cgi-bin/carddisp.pl?gene=SLC5A8
Ulcerative colitis	NF1	Neurofibromin 1	Protein Coding	54	GC17P031094	2.79322	https://www.genecards.org/cgi-bin/carddisp.pl?gene=NF1
Ulcerative colitis	LCK	LCK Proto-Oncogene, Src Family Tyrosine Kinase	Protein Coding	59	GC01P032251	2.79195	https://www.genecards.org/cgi-bin/carddisp.pl?gene=LCK
Ulcerative colitis	ACP1	Acid Phosphatase 1	Protein Coding	50	GC02P000402	2.78908	https://www.genecards.org/cgi-bin/carddisp.pl?gene=ACP1
Ulcerative colitis	MIR25	MicroRNA 25	RNA Gene	22	GC07M100093	2.78445	https://www.genecards.org/cgi-bin/carddisp.pl?gene=MIR25
Ulcerative colitis	RSPO1	R-Spondin 1	Protein Coding	51	GC01M037612	2.7827	https://www.genecards.org/cgi-bin/carddisp.pl?gene=RSPO1
Ulcerative colitis	MIR26B	MicroRNA 26b	RNA Gene	25	GC02P218402	2.77527	https://www.genecards.org/cgi-bin/carddisp.pl?gene=MIR26B
Ulcerative colitis	KLK3	Kallikrein Related Peptidase 3	Protein Coding	53	GC19P050854	2.77381	https://www.genecards.org/cgi-bin/carddisp.pl?gene=KLK3
Ulcerative colitis	MUC16	Mucin 16, Cell Surface Associated	Protein Coding	44	GC19M008848	2.76965	https://www.genecards.org/cgi-bin/carddisp.pl?gene=MUC16
Ulcerative colitis	ADCY3	Adenylate Cyclase 3	Protein Coding	53	GC02M024819	2.7672	https://www.genecards.org/cgi-bin/carddisp.pl?gene=ADCY3
Ulcerative colitis	MIR182	MicroRNA 182	RNA Gene	24	GC07M129770	2.76637	https://www.genecards.org/cgi-bin/carddisp.pl?gene=MIR182
Ulcerative colitis	S1PR1	Sphingosine-1-Phosphate Receptor 1	Protein Coding	52	GC01P101236	2.7659	https://www.genecards.org/cgi-bin/carddisp.pl?gene=S1PR1
Ulcerative colitis	HAMP	Hepcidin Antimicrobial Peptide	Protein Coding	50	GC19P072728	2.76396	https://www.genecards.org/cgi-bin/carddisp.pl?gene=HAMP
Ulcerative colitis	SPARC	Secreted Protein Acidic And Cysteine Rich	Protein Coding	56	GC05M151661	2.7571	https://www.genecards.org/cgi-bin/carddisp.pl?gene=SPARC
Ulcerative colitis	GATB	Glutamyl-TRNA Amidotransferase Subunit B	Protein Coding	48	GC04M151670	2.75536	https://www.genecards.org/cgi-bin/carddisp.pl?gene=GATB
Ulcerative colitis	MYSM1	Myb Like, SWIRM And MPN Domains 1	Protein Coding	46	GC01M058680	2.75536	https://www.genecards.org/cgi-bin/carddisp.pl?gene=MYSM1
Ulcerative colitis	PLA2G4F	Phospholipase A2 Group IVF	Protein Coding	44	GC15M042139	2.75536	https://www.genecards.org/cgi-bin/carddisp.pl?gene=PLA2G4F
Ulcerative colitis	ARHGEF16	Rho Guanine Nucleotide Exchange Factor 16	Protein Coding	45	GC01P003454	2.75406	https://www.genecards.org/cgi-bin/carddisp.pl?gene=ARHGEF16
Ulcerative colitis	FLOT1	Flotillin 1	Protein Coding	47	GC06M071649	2.75242	https://www.genecards.org/cgi-bin/carddisp.pl?gene=FLOT1
Ulcerative colitis	MIR378A	MicroRNA 378a	RNA Gene	23	GC05P149732	2.75119	https://www.genecards.org/cgi-bin/carddisp.pl?gene=MIR378A
Ulcerative colitis	LOX	Lysyl Oxidase	Protein Coding	54	GC05M122063	2.74462	https://www.genecards.org/cgi-bin/carddisp.pl?gene=LOX
Ulcerative colitis	RPS6KB1	Ribosomal Protein S6 Kinase B1	Protein Coding	55	GC17P059893	2.743	https://www.genecards.org/cgi-bin/carddisp.pl?gene=RPS6KB1
Ulcerative colitis	TUG1	Taurine Up-Regulated 1	Protein Coding	26	GC22P030969	2.74082	https://www.genecards.org/cgi-bin/carddisp.pl?gene=TUG1
Ulcerative colitis	FKBP5	FKBP Prolyl Isomerase 5	Protein Coding	56	GC06M071862	2.73887	https://www.genecards.org/cgi-bin/carddisp.pl?gene=FKBP5
Ulcerative colitis	SFTPD	Surfactant Protein D	Protein Coding	51	GC10M079937	2.73757	https://www.genecards.org/cgi-bin/carddisp.pl?gene=SFTPD
Ulcerative colitis	TYR	Tyrosinase	Protein Coding	55	GC11P089177	2.73619	https://www.genecards.org/cgi-bin/carddisp.pl?gene=TYR
Ulcerative colitis	FKBP15	FKBP Prolyl Isomerase Family Member 15	Protein Coding	43	GC09M113161	2.73617	https://www.genecards.org/cgi-bin/carddisp.pl?gene=FKBP15
Ulcerative colitis	HSPA8	Heat Shock Protein Family A (Hsp70) Member 8	Protein Coding	56	GC11M123057	2.73596	https://www.genecards.org/cgi-bin/carddisp.pl?gene=HSPA8
Ulcerative colitis	CXCL3	C-X-C Motif Chemokine Ligand 3	Protein Coding	45	GC04M074036	2.73362	https://www.genecards.org/cgi-bin/carddisp.pl?gene=CXCL3
Ulcerative colitis	TRAF2	TNF Receptor Associated Factor 2	Protein Coding	51	GC09P136881	2.73016	https://www.genecards.org/cgi-bin/carddisp.pl?gene=TRAF2
Ulcerative colitis	CYP2A6	Cytochrome P450 Family 2 Subfamily A Member 6	Protein Coding	53	GC19M040843	2.72852	https://www.genecards.org/cgi-bin/carddisp.pl?gene=CYP2A6
Ulcerative colitis	SHC1	SHC Adaptor Protein 1	Protein Coding	50	GC01M154962	2.7231	https://www.genecards.org/cgi-bin/carddisp.pl?gene=SHC1
Ulcerative colitis	VIL1	Villin 1	Protein Coding	47	GC02P218419	2.71916	https://www.genecards.org/cgi-bin/carddisp.pl?gene=VIL1
Ulcerative colitis	FPR1	Formyl Peptide Receptor 1	Protein Coding	54	GC19M051745	2.70941	https://www.genecards.org/cgi-bin/carddisp.pl?gene=FPR1
Ulcerative colitis	MECP2	Methyl-CpG Binding Protein 2	Protein Coding	53	GC0XM154021	2.7071	https://www.genecards.org/cgi-bin/carddisp.pl?gene=MECP2
Ulcerative colitis	PARP1	Poly(ADP-Ribose) Polymerase 1	Protein Coding	58	GC01M226360	2.70488	https://www.genecards.org/cgi-bin/carddisp.pl?gene=PARP1
Ulcerative colitis	INSL5	Insulin Like 5	Protein Coding	39	GC01M066797	2.70426	https://www.genecards.org/cgi-bin/carddisp.pl?gene=INSL5
Ulcerative colitis	MIR30A	MicroRNA 30a	RNA Gene	22	GC06M071403	2.70376	https://www.genecards.org/cgi-bin/carddisp.pl?gene=MIR30A
Ulcerative colitis	GLI1	GLI Family Zinc Finger 1	Protein Coding	56	GC12P057616	2.70362	https://www.genecards.org/cgi-bin/carddisp.pl?gene=GLI1
Ulcerative colitis	MAPKAPK2	MAPK Activated Protein Kinase 2	Protein Coding	54	GC01P206684	2.70308	https://www.genecards.org/cgi-bin/carddisp.pl?gene=MAPKAPK2
Ulcerative colitis	COX5A	Cytochrome C Oxidase Subunit 5A	Protein Coding	50	GC15M074919	2.69922	https://www.genecards.org/cgi-bin/carddisp.pl?gene=COX5A
Ulcerative colitis	TGFBR1	Transforming Growth Factor Beta Receptor 1	Protein Coding	61	GC09P099104	2.69874	https://www.genecards.org/cgi-bin/carddisp.pl?gene=TGFBR1
Ulcerative colitis	FCN3	Ficolin 3	Protein Coding	51	GC01M028077	2.69689	https://www.genecards.org/cgi-bin/carddisp.pl?gene=FCN3
Ulcerative colitis	POSTN	Periostin	Protein Coding	50	GC13M037562	2.69564	https://www.genecards.org/cgi-bin/carddisp.pl?gene=POSTN
Ulcerative colitis	G6PC1	Glucose-6-Phosphatase Catalytic Subunit 1	Protein Coding	51	GC17P063334	2.69563	https://www.genecards.org/cgi-bin/carddisp.pl?gene=G6PC1
Ulcerative colitis	SLIT2	Slit Guidance Ligand 2	Protein Coding	52	GC04P020321	2.69396	https://www.genecards.org/cgi-bin/carddisp.pl?gene=SLIT2
Ulcerative colitis	PITX1	Paired Like Homeodomain 1	Protein Coding	51	GC05M135027	2.69362	https://www.genecards.org/cgi-bin/carddisp.pl?gene=PITX1
Ulcerative colitis	PNMT	Phenylethanolamine N-Methyltransferase	Protein Coding	50	GC17P039667	2.69362	https://www.genecards.org/cgi-bin/carddisp.pl?gene=PNMT
Ulcerative colitis	PIM3	Pim-3 Proto-Oncogene, Serine/Threonine Kinase	Protein Coding	48	GC22P049960	2.69362	https://www.genecards.org/cgi-bin/carddisp.pl?gene=PIM3
Ulcerative colitis	SERINC3	Serine Incorporator 3	Protein Coding	46	GC20M044496	2.69362	https://www.genecards.org/cgi-bin/carddisp.pl?gene=SERINC3
Ulcerative colitis	UTS2	Urotensin 2	Protein Coding	46	GC01M007843	2.69362	https://www.genecards.org/cgi-bin/carddisp.pl?gene=UTS2
Ulcerative colitis	EMSY	EMSY Transcriptional Repressor, BRCA2 Interacting	Protein Coding	44	GC11P078495	2.69362	https://www.genecards.org/cgi-bin/carddisp.pl?gene=EMSY
Ulcerative colitis	OLIG3	Oligodendrocyte Transcription Factor 3	Protein Coding	44	GC06M137492	2.69362	https://www.genecards.org/cgi-bin/carddisp.pl?gene=OLIG3
Ulcerative colitis	SNAPC4	Small Nuclear RNA Activating Complex Polypeptide 4	Protein Coding	44	GC09M136375	2.69362	https://www.genecards.org/cgi-bin/carddisp.pl?gene=SNAPC4
Ulcerative colitis	AAMP	Angio Associated Migratory Cell Protein	Protein Coding	43	GC02M218264	2.69362	https://www.genecards.org/cgi-bin/carddisp.pl?gene=AAMP
Ulcerative colitis	EXOC3	Exocyst Complex Component 3	Protein Coding	43	GC05P000443	2.69362	https://www.genecards.org/cgi-bin/carddisp.pl?gene=EXOC3
Ulcerative colitis	STMN3	Stathmin 3	Protein Coding	43	GC20M063639	2.69362	https://www.genecards.org/cgi-bin/carddisp.pl?gene=STMN3
Ulcerative colitis	ZBTB46	Zinc Finger And BTB Domain Containing 46	Protein Coding	42	GC20M063743	2.69362	https://www.genecards.org/cgi-bin/carddisp.pl?gene=ZBTB46
Ulcerative colitis	PRXL2B	Peroxiredoxin Like 2B	Protein Coding	35	GC01P004436	2.69362	https://www.genecards.org/cgi-bin/carddisp.pl?gene=PRXL2B
Ulcerative colitis	LOC100996583	Uncharacterized LOC100996583	RNA Gene	12	GC01P004434	2.69362	https://www.genecards.org/cgi-bin/carddisp.pl?gene=LOC100996583
Ulcerative colitis	CD244	CD244 Molecule	Protein Coding	50	GC01M160830	2.6912	https://www.genecards.org/cgi-bin/carddisp.pl?gene=CD244
Ulcerative colitis	NFKBIZ	NFKB Inhibitor Zeta	Protein Coding	42	GC03P101827	2.69055	https://www.genecards.org/cgi-bin/carddisp.pl?gene=NFKBIZ
Ulcerative colitis	WASHC5	WASH Complex Subunit 5	Protein Coding	46	GC08M132925	2.68879	https://www.genecards.org/cgi-bin/carddisp.pl?gene=WASHC5
Ulcerative colitis	SP1	Sp1 Transcription Factor	Protein Coding	53	GC12P053380	2.6884	https://www.genecards.org/cgi-bin/carddisp.pl?gene=SP1
Ulcerative colitis	PTPRO	Protein Tyrosine Phosphatase Receptor Type O	Protein Coding	54	GC12P023827	2.68361	https://www.genecards.org/cgi-bin/carddisp.pl?gene=PTPRO
Ulcerative colitis	AFP	Alpha Fetoprotein	Protein Coding	53	GC04P073431	2.68346	https://www.genecards.org/cgi-bin/carddisp.pl?gene=AFP
Ulcerative colitis	ITPA	Inosine Triphosphatase	Protein Coding	52	GC20P004503	2.67974	https://www.genecards.org/cgi-bin/carddisp.pl?gene=ITPA
Ulcerative colitis	VTN	Vitronectin	Protein Coding	51	GC17M051189	2.67586	https://www.genecards.org/cgi-bin/carddisp.pl?gene=VTN
Ulcerative colitis	IL32	Interleukin 32	Protein Coding	45	GC16P013549	2.67307	https://www.genecards.org/cgi-bin/carddisp.pl?gene=IL32
Ulcerative colitis	CARD11	Caspase Recruitment Domain Family Member 11	Protein Coding	53	GC07M002906	2.66993	https://www.genecards.org/cgi-bin/carddisp.pl?gene=CARD11
Ulcerative colitis	WNT2	Wnt Family Member 2	Protein Coding	50	GC07M117313	2.66484	https://www.genecards.org/cgi-bin/carddisp.pl?gene=WNT2
Ulcerative colitis	COL4A5	Collagen Type IV Alpha 5 Chain	Protein Coding	51	GC0XP108439	2.6549	https://www.genecards.org/cgi-bin/carddisp.pl?gene=COL4A5
Ulcerative colitis	DAXX	Death Domain Associated Protein	Protein Coding	50	GC06M033318	2.65331	https://www.genecards.org/cgi-bin/carddisp.pl?gene=DAXX
Ulcerative colitis	ADCY10	Adenylate Cyclase 10	Protein Coding	50	GC01M167809	2.64718	https://www.genecards.org/cgi-bin/carddisp.pl?gene=ADCY10
Ulcerative colitis	ADRA2A	Adrenoceptor Alpha 2A	Protein Coding	52	GC10P111077	2.64617	https://www.genecards.org/cgi-bin/carddisp.pl?gene=ADRA2A
Ulcerative colitis	IL13RA2	Interleukin 13 Receptor Subunit Alpha 2	Protein Coding	46	GC0XM115003	2.64479	https://www.genecards.org/cgi-bin/carddisp.pl?gene=IL13RA2
Ulcerative colitis	MIR196A2	MicroRNA 196a-2	RNA Gene	25	GC12P055232	2.64075	https://www.genecards.org/cgi-bin/carddisp.pl?gene=MIR196A2
Ulcerative colitis	MIR149	MicroRNA 149	RNA Gene	26	GC02P240456	2.63675	https://www.genecards.org/cgi-bin/carddisp.pl?gene=MIR149
Ulcerative colitis	PRKCB	Protein Kinase C Beta	Protein Coding	55	GC16P024574	2.63119	https://www.genecards.org/cgi-bin/carddisp.pl?gene=PRKCB
Ulcerative colitis	GART	Phosphoribosylglycinamide Formyltransferase, Phosphoribosylglycinamide Synthetase, Phosphoribosylaminoimidazole Synthetase	Protein Coding	50	GC21M033503	2.63079	https://www.genecards.org/cgi-bin/carddisp.pl?gene=GART
Ulcerative colitis	IER3	Immediate Early Response 3	Protein Coding	44	GC06M030743	2.62357	https://www.genecards.org/cgi-bin/carddisp.pl?gene=IER3
Ulcerative colitis	MIR9-1	MicroRNA 9-1	RNA Gene	23	GC01M156420	2.62349	https://www.genecards.org/cgi-bin/carddisp.pl?gene=MIR9-1
Ulcerative colitis	EXO1	Exonuclease 1	Protein Coding	49	GC01P241847	2.62322	https://www.genecards.org/cgi-bin/carddisp.pl?gene=EXO1
Ulcerative colitis	RCL1	RNA Terminal Phosphate Cyclase Like 1	Protein Coding	45	GC09P004782	2.62098	https://www.genecards.org/cgi-bin/carddisp.pl?gene=RCL1
Ulcerative colitis	CD69	CD69 Molecule	Protein Coding	49	GC12M022623	2.62096	https://www.genecards.org/cgi-bin/carddisp.pl?gene=CD69
Ulcerative colitis	KIR2DL3	Killer Cell Immunoglobulin Like Receptor, Two Ig Domains And Long Cytoplasmic Tail 3	Protein Coding	43	GC19P074381	2.6208	https://www.genecards.org/cgi-bin/carddisp.pl?gene=KIR2DL3
Ulcerative colitis	NBN	Nibrin	Protein Coding	55	GC08M089933	2.61999	https://www.genecards.org/cgi-bin/carddisp.pl?gene=NBN
Ulcerative colitis	TNFSF13B	TNF Superfamily Member 13b	Protein Coding	52	GC13P108251	2.61612	https://www.genecards.org/cgi-bin/carddisp.pl?gene=TNFSF13B
Ulcerative colitis	IDH2	Isocitrate Dehydrogenase (NADP(+)) 2	Protein Coding	60	GC15M090083	2.61535	https://www.genecards.org/cgi-bin/carddisp.pl?gene=IDH2
Ulcerative colitis	AGT	Angiotensinogen	Protein Coding	56	GC01M230690	2.61277	https://www.genecards.org/cgi-bin/carddisp.pl?gene=AGT
Ulcerative colitis	HDGF	Heparin Binding Growth Factor	Protein Coding	46	GC01M156949	2.60587	https://www.genecards.org/cgi-bin/carddisp.pl?gene=HDGF
Ulcerative colitis	PPY	Pancreatic Polypeptide	Protein Coding	46	GC17M043940	2.60528	https://www.genecards.org/cgi-bin/carddisp.pl?gene=PPY
Ulcerative colitis	CCNB1	Cyclin B1	Protein Coding	53	GC05P069167	2.60492	https://www.genecards.org/cgi-bin/carddisp.pl?gene=CCNB1
Ulcerative colitis	GAL	Galanin And GMAP Prepropeptide	Protein Coding	51	GC11P071097	2.59281	https://www.genecards.org/cgi-bin/carddisp.pl?gene=GAL
Ulcerative colitis	ABL1	ABL Proto-Oncogene 1, Non-Receptor Tyrosine Kinase	Protein Coding	59	GC09P130713	2.59156	https://www.genecards.org/cgi-bin/carddisp.pl?gene=ABL1
Ulcerative colitis	CD248	CD248 Molecule	Protein Coding	46	GC11M066314	2.58622	https://www.genecards.org/cgi-bin/carddisp.pl?gene=CD248
Ulcerative colitis	UBAC1	UBA Domain Containing 1	Protein Coding	43	GC09M135932	2.58622	https://www.genecards.org/cgi-bin/carddisp.pl?gene=UBAC1
Ulcerative colitis	POU5F1	POU Class 5 Homeobox 1	Protein Coding	51	GC06M071676	2.58595	https://www.genecards.org/cgi-bin/carddisp.pl?gene=POU5F1
Ulcerative colitis	MAD2L1	Mitotic Arrest Deficient 2 Like 1	Protein Coding	51	GC04M120055	2.58587	https://www.genecards.org/cgi-bin/carddisp.pl?gene=MAD2L1
Ulcerative colitis	TBXT	T-Box Transcription Factor T	Protein Coding	50	GC06M166158	2.58368	https://www.genecards.org/cgi-bin/carddisp.pl?gene=TBXT
Ulcerative colitis	CFH	Complement Factor H	Protein Coding	54	GC01P196621	2.58246	https://www.genecards.org/cgi-bin/carddisp.pl?gene=CFH
Ulcerative colitis	DUOXA2	Dual Oxidase Maturation Factor 2	Protein Coding	42	GC15P045114	2.57879	https://www.genecards.org/cgi-bin/carddisp.pl?gene=DUOXA2
Ulcerative colitis	LINC00243	Long Intergenic Non-Protein Coding RNA 243	RNA Gene	19	GC06M071647	2.57872	https://www.genecards.org/cgi-bin/carddisp.pl?gene=LINC00243
Ulcerative colitis	HCAR2	Hydroxycarboxylic Acid Receptor 2	Protein Coding	47	GC12M122701	2.57832	https://www.genecards.org/cgi-bin/carddisp.pl?gene=HCAR2
Ulcerative colitis	ITGA5	Integrin Subunit Alpha 5	Protein Coding	56	GC12M055005	2.57808	https://www.genecards.org/cgi-bin/carddisp.pl?gene=ITGA5
Ulcerative colitis	DVL1	Dishevelled Segment Polarity Protein 1	Protein Coding	53	GC01M001335	2.57655	https://www.genecards.org/cgi-bin/carddisp.pl?gene=DVL1
Ulcerative colitis	AK2	Adenylate Kinase 2	Protein Coding	55	GC01M033007	2.57443	https://www.genecards.org/cgi-bin/carddisp.pl?gene=AK2
Ulcerative colitis	MAPK1	Mitogen-Activated Protein Kinase 1	Protein Coding	59	GC22M021759	2.57292	https://www.genecards.org/cgi-bin/carddisp.pl?gene=MAPK1
Ulcerative colitis	MTOR	Mechanistic Target Of Rapamycin Kinase	Protein Coding	62	GC01M011106	2.57063	https://www.genecards.org/cgi-bin/carddisp.pl?gene=MTOR
Ulcerative colitis	CCN1	Cellular Communication Network Factor 1	Protein Coding	47	GC01P085581	2.56822	https://www.genecards.org/cgi-bin/carddisp.pl?gene=CCN1
Ulcerative colitis	RASSF1	Ras Association Domain Family Member 1	Protein Coding	49	GC03M050329	2.56681	https://www.genecards.org/cgi-bin/carddisp.pl?gene=RASSF1
Ulcerative colitis	MIR130A	MicroRNA 130a	RNA Gene	24	GC11P057641	2.56291	https://www.genecards.org/cgi-bin/carddisp.pl?gene=MIR130A
Ulcerative colitis	SFRP2	Secreted Frizzled Related Protein 2	Protein Coding	47	GC04M153780	2.55992	https://www.genecards.org/cgi-bin/carddisp.pl?gene=SFRP2
Ulcerative colitis	USP8	Ubiquitin Specific Peptidase 8	Protein Coding	53	GC15P050424	2.55748	https://www.genecards.org/cgi-bin/carddisp.pl?gene=USP8
Ulcerative colitis	HSP90B1	Heat Shock Protein 90 Beta Family Member 1	Protein Coding	53	GC12P103930	2.5551	https://www.genecards.org/cgi-bin/carddisp.pl?gene=HSP90B1
Ulcerative colitis	MRC1	Mannose Receptor C-Type 1	Protein Coding	46	GC10P017809	2.5551	https://www.genecards.org/cgi-bin/carddisp.pl?gene=MRC1
Ulcerative colitis	MUC19	Mucin 19, Oligomeric	Protein Coding	36	GC12P040393	2.5517	https://www.genecards.org/cgi-bin/carddisp.pl?gene=MUC19
Ulcerative colitis	TRB	T Cell Receptor Beta Locus	Protein Coding	25	GC07P150792	2.55133	https://www.genecards.org/cgi-bin/carddisp.pl?gene=TRB
Ulcerative colitis	THY1	Thy-1 Cell Surface Antigen	Protein Coding	50	GC11M119417	2.55024	https://www.genecards.org/cgi-bin/carddisp.pl?gene=THY1
Ulcerative colitis	APOA1	Apolipoprotein A1	Protein Coding	57	GC11M116835	2.54805	https://www.genecards.org/cgi-bin/carddisp.pl?gene=APOA1
Ulcerative colitis	MIR137	MicroRNA 137	RNA Gene	21	GC01M098046	2.54755	https://www.genecards.org/cgi-bin/carddisp.pl?gene=MIR137
Ulcerative colitis	TIMP3	TIMP Metallopeptidase Inhibitor 3	Protein Coding	50	GC22P044970	2.54382	https://www.genecards.org/cgi-bin/carddisp.pl?gene=TIMP3
Ulcerative colitis	NFKB2	Nuclear Factor Kappa B Subunit 2	Protein Coding	59	GC10P102394	2.54354	https://www.genecards.org/cgi-bin/carddisp.pl?gene=NFKB2
Ulcerative colitis	EED	Embryonic Ectoderm Development	Protein Coding	50	GC11P086244	2.54243	https://www.genecards.org/cgi-bin/carddisp.pl?gene=EED
Ulcerative colitis	CD83	CD83 Molecule	Protein Coding	47	GC06P014117	2.53789	https://www.genecards.org/cgi-bin/carddisp.pl?gene=CD83
Ulcerative colitis	TSLP	Thymic Stromal Lymphopoietin	Protein Coding	46	GC05P111070	2.53755	https://www.genecards.org/cgi-bin/carddisp.pl?gene=TSLP
Ulcerative colitis	RRM2B	Ribonucleotide Reductase Regulatory TP53 Inducible Subunit M2B	Protein Coding	56	GC08M102204	2.53544	https://www.genecards.org/cgi-bin/carddisp.pl?gene=RRM2B
Ulcerative colitis	DDX39B	DExD-Box Helicase 39B	Protein Coding	48	GC06M031530	2.53143	https://www.genecards.org/cgi-bin/carddisp.pl?gene=DDX39B
Ulcerative colitis	DEFB103A	Defensin Beta 103A	Protein Coding	30	GC08P007881	2.52855	https://www.genecards.org/cgi-bin/carddisp.pl?gene=DEFB103A
Ulcerative colitis	ANG	Angiogenin	Protein Coding	51	GC14P034388	2.52576	https://www.genecards.org/cgi-bin/carddisp.pl?gene=ANG
Ulcerative colitis	ATF4	Activating Transcription Factor 4	Protein Coding	52	GC22P039519	2.52084	https://www.genecards.org/cgi-bin/carddisp.pl?gene=ATF4
Ulcerative colitis	PSORS1C1	Psoriasis Susceptibility 1 Candidate 1	Protein Coding	35	GC06P031114	2.5205	https://www.genecards.org/cgi-bin/carddisp.pl?gene=PSORS1C1
Ulcerative colitis	CSN1S1	Casein Alpha S1	Protein Coding	43	GC04P069932	2.51924	https://www.genecards.org/cgi-bin/carddisp.pl?gene=CSN1S1
Ulcerative colitis	IFNGR2	Interferon Gamma Receptor 2	Protein Coding	51	GC21P033402	2.51553	https://www.genecards.org/cgi-bin/carddisp.pl?gene=IFNGR2
Ulcerative colitis	ARHGEF2	Rho/Rac Guanine Nucleotide Exchange Factor 2	Protein Coding	52	GC01M155946	2.51321	https://www.genecards.org/cgi-bin/carddisp.pl?gene=ARHGEF2
Ulcerative colitis	REV3L	REV3 Like, DNA Directed Polymerase Zeta Catalytic Subunit	Protein Coding	51	GC06M111299	2.51177	https://www.genecards.org/cgi-bin/carddisp.pl?gene=REV3L
Ulcerative colitis	USF1	Upstream Transcription Factor 1	Protein Coding	50	GC01M161039	2.51177	https://www.genecards.org/cgi-bin/carddisp.pl?gene=USF1
Ulcerative colitis	SEMA6D	Semaphorin 6D	Protein Coding	47	GC15P047184	2.51177	https://www.genecards.org/cgi-bin/carddisp.pl?gene=SEMA6D
Ulcerative colitis	ZNF365	Zinc Finger Protein 365	Protein Coding	44	GC10P062374	2.51177	https://www.genecards.org/cgi-bin/carddisp.pl?gene=ZNF365
Ulcerative colitis	SNX20	Sorting Nexin 20	Protein Coding	42	GC16M050700	2.51177	https://www.genecards.org/cgi-bin/carddisp.pl?gene=SNX20
Ulcerative colitis	CA2	Carbonic Anhydrase 2	Protein Coding	59	GC08P085463	2.50769	https://www.genecards.org/cgi-bin/carddisp.pl?gene=CA2
Ulcerative colitis	CHEK1	Checkpoint Kinase 1	Protein Coding	56	GC11P125625	2.50463	https://www.genecards.org/cgi-bin/carddisp.pl?gene=CHEK1
Ulcerative colitis	MIR24-2	MicroRNA 24-2	RNA Gene	22	GC19M014655	2.50463	https://www.genecards.org/cgi-bin/carddisp.pl?gene=MIR24-2
Ulcerative colitis	BDKRB2	Bradykinin Receptor B2	Protein Coding	52	GC14P096205	2.5023	https://www.genecards.org/cgi-bin/carddisp.pl?gene=BDKRB2
Ulcerative colitis	RAG2	Recombination Activating 2	Protein Coding	48	GC11M036575	2.50013	https://www.genecards.org/cgi-bin/carddisp.pl?gene=RAG2
Ulcerative colitis	PSMD4	Proteasome 26S Subunit Ubiquitin Receptor, Non-ATPase 4	Protein Coding	50	GC01P151378	2.49758	https://www.genecards.org/cgi-bin/carddisp.pl?gene=PSMD4
Ulcerative colitis	TNFRSF10D	TNF Receptor Superfamily Member 10d	Protein Coding	49	GC08M023135	2.49758	https://www.genecards.org/cgi-bin/carddisp.pl?gene=TNFRSF10D
Ulcerative colitis	GUCA2A	Guanylate Cyclase Activator 2A	Protein Coding	43	GC01M042162	2.49758	https://www.genecards.org/cgi-bin/carddisp.pl?gene=GUCA2A
Ulcerative colitis	CACNA2D1	Calcium Voltage-Gated Channel Auxiliary Subunit Alpha2delta 1	Protein Coding	53	GC07M081946	2.49747	https://www.genecards.org/cgi-bin/carddisp.pl?gene=CACNA2D1
Ulcerative colitis	GPD2	Glycerol-3-Phosphate Dehydrogenase 2	Protein Coding	53	GC02P156401	2.49747	https://www.genecards.org/cgi-bin/carddisp.pl?gene=GPD2
Ulcerative colitis	VARS2	Valyl-TRNA Synthetase 2, Mitochondrial	Protein Coding	48	GC06P092139	2.49747	https://www.genecards.org/cgi-bin/carddisp.pl?gene=VARS2
Ulcerative colitis	AGPAT1	1-Acylglycerol-3-Phosphate O-Acyltransferase 1	Protein Coding	47	GC06M032168	2.49747	https://www.genecards.org/cgi-bin/carddisp.pl?gene=AGPAT1
Ulcerative colitis	COL13A1	Collagen Type XIII Alpha 1 Chain	Protein Coding	47	GC10P069801	2.49747	https://www.genecards.org/cgi-bin/carddisp.pl?gene=COL13A1
Ulcerative colitis	NCAPD2	Non-SMC Condensin I Complex Subunit D2	Protein Coding	47	GC12P006493	2.49747	https://www.genecards.org/cgi-bin/carddisp.pl?gene=NCAPD2
Ulcerative colitis	CPXM2	Carboxypeptidase X, M14 Family Member 2	Protein Coding	46	GC10M123710	2.49747	https://www.genecards.org/cgi-bin/carddisp.pl?gene=CPXM2
Ulcerative colitis	ACTR3B	Actin Related Protein 3B	Protein Coding	45	GC07P152759	2.49747	https://www.genecards.org/cgi-bin/carddisp.pl?gene=ACTR3B
Ulcerative colitis	CALHM6	Calcium Homeostasis Modulator Family Member 6	Protein Coding	34	GC06P116462	2.49747	https://www.genecards.org/cgi-bin/carddisp.pl?gene=CALHM6
Ulcerative colitis	HCG9	HLA Complex Group 9	RNA Gene	22	GC06P092110	2.49747	https://www.genecards.org/cgi-bin/carddisp.pl?gene=HCG9
Ulcerative colitis	HCG26	HLA Complex Group 26	RNA Gene	16	GC06P092148	2.49747	https://www.genecards.org/cgi-bin/carddisp.pl?gene=HCG26
Ulcerative colitis	MIR588	MicroRNA 588	RNA Gene	15	GC06P126484	2.49747	https://www.genecards.org/cgi-bin/carddisp.pl?gene=MIR588
Ulcerative colitis	CCR7	C-C Motif Chemokine Receptor 7	Protein Coding	51	GC17M051716	2.49257	https://www.genecards.org/cgi-bin/carddisp.pl?gene=CCR7
Ulcerative colitis	APAF1	Apoptotic Peptidase Activating Factor 1	Protein Coding	52	GC12P098645	2.48804	https://www.genecards.org/cgi-bin/carddisp.pl?gene=APAF1
Ulcerative colitis	MSH3	MutS Homolog 3	Protein Coding	50	GC05P080654	2.48804	https://www.genecards.org/cgi-bin/carddisp.pl?gene=MSH3
Ulcerative colitis	MIR103A1	MicroRNA 103a-1	RNA Gene	20	GC05M168560	2.48693	https://www.genecards.org/cgi-bin/carddisp.pl?gene=MIR103A1
Ulcerative colitis	PLEK	Pleckstrin	Protein Coding	47	GC02P068365	2.48074	https://www.genecards.org/cgi-bin/carddisp.pl?gene=PLEK
Ulcerative colitis	SERPINB1	Serpin Family B Member 1	Protein Coding	47	GC06M002852	2.47971	https://www.genecards.org/cgi-bin/carddisp.pl?gene=SERPINB1
Ulcerative colitis	MIR499A	MicroRNA 499a	RNA Gene	25	GC20P034990	2.47917	https://www.genecards.org/cgi-bin/carddisp.pl?gene=MIR499A
Ulcerative colitis	HLA-DRB3	Major Histocompatibility Complex, Class II, DR Beta 3	Protein Coding	34	GC06Mn03715	2.47915	https://www.genecards.org/cgi-bin/carddisp.pl?gene=HLA-DRB3
Ulcerative colitis	MIR22	MicroRNA 22	RNA Gene	23	GC17M001713	2.47538	https://www.genecards.org/cgi-bin/carddisp.pl?gene=MIR22
Ulcerative colitis	CCR4	C-C Motif Chemokine Receptor 4	Protein Coding	51	GC03P032951	2.47479	https://www.genecards.org/cgi-bin/carddisp.pl?gene=CCR4
Ulcerative colitis	ENTPD1	Ectonucleoside Triphosphate Diphosphohydrolase 1	Protein Coding	57	GC10P095711	2.47285	https://www.genecards.org/cgi-bin/carddisp.pl?gene=ENTPD1
Ulcerative colitis	TACR2	Tachykinin Receptor 2	Protein Coding	50	GC10M069403	2.47067	https://www.genecards.org/cgi-bin/carddisp.pl?gene=TACR2
Ulcerative colitis	LRRK2	Leucine Rich Repeat Kinase 2	Protein Coding	56	GC12P040196	2.46965	https://www.genecards.org/cgi-bin/carddisp.pl?gene=LRRK2
Ulcerative colitis	PRPF8	Pre-MRNA Processing Factor 8	Protein Coding	49	GC17M001650	2.46855	https://www.genecards.org/cgi-bin/carddisp.pl?gene=PRPF8
Ulcerative colitis	COG6	Component Of Oligomeric Golgi Complex 6	Protein Coding	44	GC13P039655	2.46855	https://www.genecards.org/cgi-bin/carddisp.pl?gene=COG6
Ulcerative colitis	ATF2	Activating Transcription Factor 2	Protein Coding	54	GC02M175072	2.46599	https://www.genecards.org/cgi-bin/carddisp.pl?gene=ATF2
Ulcerative colitis	IGFBP3	Insulin Like Growth Factor Binding Protein 3	Protein Coding	54	GC07M045912	2.46384	https://www.genecards.org/cgi-bin/carddisp.pl?gene=IGFBP3
Ulcerative colitis	IGES	Immunoglobulin E Concentration, Serum	Genetic Locus	4	GC05U990033	2.46058	https://www.genecards.org/cgi-bin/carddisp.pl?gene=IGES
Ulcerative colitis	NR5A2	Nuclear Receptor Subfamily 5 Group A Member 2	Protein Coding	51	GC01P199996	2.4602	https://www.genecards.org/cgi-bin/carddisp.pl?gene=NR5A2
Ulcerative colitis	FOXM1	Forkhead Box M1	Protein Coding	50	GC12M002857	2.4565	https://www.genecards.org/cgi-bin/carddisp.pl?gene=FOXM1
Ulcerative colitis	DNMT3A	DNA Methyltransferase 3 Alpha	Protein Coding	57	GC02M025228	2.45559	https://www.genecards.org/cgi-bin/carddisp.pl?gene=DNMT3A
Ulcerative colitis	CXCL6	C-X-C Motif Chemokine Ligand 6	Protein Coding	46	GC04P073837	2.45021	https://www.genecards.org/cgi-bin/carddisp.pl?gene=CXCL6
Ulcerative colitis	MIR196B	MicroRNA 196b	RNA Gene	24	GC07M027657	2.44959	https://www.genecards.org/cgi-bin/carddisp.pl?gene=MIR196B
Ulcerative colitis	KITLG	KIT Ligand	Protein Coding	53	GC12M088492	2.44834	https://www.genecards.org/cgi-bin/carddisp.pl?gene=KITLG
Ulcerative colitis	TFPI	Tissue Factor Pathway Inhibitor	Protein Coding	53	GC02M187464	2.44663	https://www.genecards.org/cgi-bin/carddisp.pl?gene=TFPI
Ulcerative colitis	TRPV1	Transient Receptor Potential Cation Channel Subfamily V Member 1	Protein Coding	55	GC17M003565	2.44387	https://www.genecards.org/cgi-bin/carddisp.pl?gene=TRPV1
Ulcerative colitis	NPSR1	Neuropeptide S Receptor 1	Protein Coding	47	GC07P034664	2.44119	https://www.genecards.org/cgi-bin/carddisp.pl?gene=NPSR1
Ulcerative colitis	IL7	Interleukin 7	Protein Coding	50	GC08M078689	2.44106	https://www.genecards.org/cgi-bin/carddisp.pl?gene=IL7
Ulcerative colitis	MIR18A	MicroRNA 18a	RNA Gene	21	GC13P091583	2.43927	https://www.genecards.org/cgi-bin/carddisp.pl?gene=MIR18A
Ulcerative colitis	PRDX1	Peroxiredoxin 1	Protein Coding	56	GC01M045512	2.43715	https://www.genecards.org/cgi-bin/carddisp.pl?gene=PRDX1
Ulcerative colitis	SYVN1	Synoviolin 1	Protein Coding	46	GC11M099689	2.43464	https://www.genecards.org/cgi-bin/carddisp.pl?gene=SYVN1
Ulcerative colitis	TGFB2	Transforming Growth Factor Beta 2	Protein Coding	58	GC01P218345	2.42825	https://www.genecards.org/cgi-bin/carddisp.pl?gene=TGFB2
Ulcerative colitis	GPR183	G Protein-Coupled Receptor 183	Protein Coding	46	GC13M099370	2.42287	https://www.genecards.org/cgi-bin/carddisp.pl?gene=GPR183
Ulcerative colitis	CEACAM3	CEA Cell Adhesion Molecule 3	Protein Coding	49	GC19P041796	2.41963	https://www.genecards.org/cgi-bin/carddisp.pl?gene=CEACAM3
Ulcerative colitis	IGFBP2	Insulin Like Growth Factor Binding Protein 2	Protein Coding	51	GC02P216632	2.41918	https://www.genecards.org/cgi-bin/carddisp.pl?gene=IGFBP2
Ulcerative colitis	LRP5	LDL Receptor Related Protein 5	Protein Coding	56	GC11P068298	2.41633	https://www.genecards.org/cgi-bin/carddisp.pl?gene=LRP5
Ulcerative colitis	PHLPP2	PH Domain And Leucine Rich Repeat Protein Phosphatase 2	Protein Coding	48	GC16M071637	2.41633	https://www.genecards.org/cgi-bin/carddisp.pl?gene=PHLPP2
Ulcerative colitis	GUCA2B	Guanylate Cyclase Activator 2B	Protein Coding	44	GC01P042153	2.41633	https://www.genecards.org/cgi-bin/carddisp.pl?gene=GUCA2B
Ulcerative colitis	ITGA6	Integrin Subunit Alpha 6	Protein Coding	56	GC02P172427	2.4156	https://www.genecards.org/cgi-bin/carddisp.pl?gene=ITGA6
Ulcerative colitis	ERCC2	ERCC Excision Repair 2, TFIIH Core Complex Helicase Subunit	Protein Coding	53	GC19M045349	2.4106	https://www.genecards.org/cgi-bin/carddisp.pl?gene=ERCC2
Ulcerative colitis	MUC17	Mucin 17, Cell Surface Associated	Protein Coding	42	GC07P101020	2.40333	https://www.genecards.org/cgi-bin/carddisp.pl?gene=MUC17
Ulcerative colitis	DRD2	Dopamine Receptor D2	Protein Coding	56	GC11M113409	2.39736	https://www.genecards.org/cgi-bin/carddisp.pl?gene=DRD2
Ulcerative colitis	SLC18A3	Solute Carrier Family 18 Member A3	Protein Coding	50	GC10P049610	2.39422	https://www.genecards.org/cgi-bin/carddisp.pl?gene=SLC18A3
Ulcerative colitis	CFHR1	Complement Factor H Related 1	Protein Coding	50	GC01P196822	2.3928	https://www.genecards.org/cgi-bin/carddisp.pl?gene=CFHR1
Ulcerative colitis	PROS1	Protein S	Protein Coding	55	GC03M093873	2.39207	https://www.genecards.org/cgi-bin/carddisp.pl?gene=PROS1
Ulcerative colitis	SGF29	SAGA Complex Associated Factor 29	Protein Coding	40	GC16P042592	2.39051	https://www.genecards.org/cgi-bin/carddisp.pl?gene=SGF29
Ulcerative colitis	ADCYAP1	Adenylate Cyclase Activating Polypeptide 1	Protein Coding	47	GC18P000895	2.37761	https://www.genecards.org/cgi-bin/carddisp.pl?gene=ADCYAP1
Ulcerative colitis	COL1A2	Collagen Type I Alpha 2 Chain	Protein Coding	54	GC07P094394	2.37684	https://www.genecards.org/cgi-bin/carddisp.pl?gene=COL1A2
Ulcerative colitis	TNFRSF18	TNF Receptor Superfamily Member 18	Protein Coding	48	GC01M001203	2.37576	https://www.genecards.org/cgi-bin/carddisp.pl?gene=TNFRSF18
Ulcerative colitis	SAA4	Serum Amyloid A4, Constitutive	Protein Coding	45	GC11M018234	2.37519	https://www.genecards.org/cgi-bin/carddisp.pl?gene=SAA4
Ulcerative colitis	CCL17	C-C Motif Chemokine Ligand 17	Protein Coding	47	GC16P057416	2.37238	https://www.genecards.org/cgi-bin/carddisp.pl?gene=CCL17
Ulcerative colitis	CLN3	CLN3 Lysosomal/Endosomal Transmembrane Protein, Battenin	Protein Coding	50	GC16M028466	2.36677	https://www.genecards.org/cgi-bin/carddisp.pl?gene=CLN3
Ulcerative colitis	MAFK	MAF BZIP Transcription Factor K	Protein Coding	45	GC07P003402	2.36534	https://www.genecards.org/cgi-bin/carddisp.pl?gene=MAFK
Ulcerative colitis	SDC1	Syndecan 1	Protein Coding	50	GC02M020200	2.35858	https://www.genecards.org/cgi-bin/carddisp.pl?gene=SDC1
Ulcerative colitis	FCGRT	Fc Gamma Receptor And Transporter	Protein Coding	50	GC19P049506	2.35549	https://www.genecards.org/cgi-bin/carddisp.pl?gene=FCGRT
Ulcerative colitis	CYP4F3	Cytochrome P450 Family 4 Subfamily F Member 3	Protein Coding	48	GC19P015640	2.35449	https://www.genecards.org/cgi-bin/carddisp.pl?gene=CYP4F3
Ulcerative colitis	CTH	Cystathionine Gamma-Lyase	Protein Coding	56	GC01P070411	2.35076	https://www.genecards.org/cgi-bin/carddisp.pl?gene=CTH
Ulcerative colitis	VCL	Vinculin	Protein Coding	54	GC10P073995	2.34895	https://www.genecards.org/cgi-bin/carddisp.pl?gene=VCL
Ulcerative colitis	ITGA3	Integrin Subunit Alpha 3	Protein Coding	55	GC17P050055	2.346	https://www.genecards.org/cgi-bin/carddisp.pl?gene=ITGA3
Ulcerative colitis	GJA1	Gap Junction Protein Alpha 1	Protein Coding	57	GC06P121436	2.34468	https://www.genecards.org/cgi-bin/carddisp.pl?gene=GJA1
Ulcerative colitis	NAGLU	N-Acetyl-Alpha-Glucosaminidase	Protein Coding	49	GC17P061991	2.34316	https://www.genecards.org/cgi-bin/carddisp.pl?gene=NAGLU
Ulcerative colitis	NT5E	5'-Nucleotidase Ecto	Protein Coding	59	GC06P085449	2.34091	https://www.genecards.org/cgi-bin/carddisp.pl?gene=NT5E
Ulcerative colitis	PPBP	Pro-Platelet Basic Protein	Protein Coding	49	GC04M073986	2.34061	https://www.genecards.org/cgi-bin/carddisp.pl?gene=PPBP
Ulcerative colitis	TXNIP	Thioredoxin Interacting Protein	Protein Coding	46	GC01M145992	2.3374	https://www.genecards.org/cgi-bin/carddisp.pl?gene=TXNIP
Ulcerative colitis	SRSF6	Serine And Arginine Rich Splicing Factor 6	Protein Coding	47	GC20P043457	2.33489	https://www.genecards.org/cgi-bin/carddisp.pl?gene=SRSF6
Ulcerative colitis	MIR455	MicroRNA 455	RNA Gene	22	GC09P114209	2.334	https://www.genecards.org/cgi-bin/carddisp.pl?gene=MIR455
Ulcerative colitis	NOL3	Nucleolar Protein 3	Protein Coding	49	GC16P067218	2.33081	https://www.genecards.org/cgi-bin/carddisp.pl?gene=NOL3
Ulcerative colitis	ITGA2	Integrin Subunit Alpha 2	Protein Coding	53	GC05P052989	2.32942	https://www.genecards.org/cgi-bin/carddisp.pl?gene=ITGA2
Ulcerative colitis	VPS16	VPS16 Core Subunit Of CORVET And HOPS Complexes	Protein Coding	43	GC20P002840	2.3282	https://www.genecards.org/cgi-bin/carddisp.pl?gene=VPS16
Ulcerative colitis	PLPPR5	Phospholipid Phosphatase Related 5	Protein Coding	38	GC01M098891	2.32673	https://www.genecards.org/cgi-bin/carddisp.pl?gene=PLPPR5
Ulcerative colitis	SLC15A5	Solute Carrier Family 15 Member 5	Protein Coding	32	GC12M016188	2.32673	https://www.genecards.org/cgi-bin/carddisp.pl?gene=SLC15A5
Ulcerative colitis	TRAF1	TNF Receptor Associated Factor 1	Protein Coding	48	GC09M120902	2.32368	https://www.genecards.org/cgi-bin/carddisp.pl?gene=TRAF1
Ulcerative colitis	FBXW11	F-Box And WD Repeat Domain Containing 11	Protein Coding	52	GC05M171861	2.32202	https://www.genecards.org/cgi-bin/carddisp.pl?gene=FBXW11
Ulcerative colitis	RIGI	RNA Sensor RIG-I	Protein Coding	53	GC09M032462	2.32094	https://www.genecards.org/cgi-bin/carddisp.pl?gene=RIGI
Ulcerative colitis	CD2	CD2 Molecule	Protein Coding	51	GC01P116754	2.319	https://www.genecards.org/cgi-bin/carddisp.pl?gene=CD2
Ulcerative colitis	REN	Renin	Protein Coding	55	GC01M204154	2.30938	https://www.genecards.org/cgi-bin/carddisp.pl?gene=REN
Ulcerative colitis	PPP1R14A	Protein Phosphatase 1 Regulatory Inhibitor Subunit 14A	Protein Coding	46	GC19M038251	2.30563	https://www.genecards.org/cgi-bin/carddisp.pl?gene=PPP1R14A
Ulcerative colitis	PTK2	Protein Tyrosine Kinase 2	Protein Coding	55	GC08M140657	2.29926	https://www.genecards.org/cgi-bin/carddisp.pl?gene=PTK2
Ulcerative colitis	ST14	ST14 Transmembrane Serine Protease Matriptase	Protein Coding	55	GC11P130159	2.29614	https://www.genecards.org/cgi-bin/carddisp.pl?gene=ST14
Ulcerative colitis	TNFSF12	TNF Superfamily Member 12	Protein Coding	46	GC17P011736	2.29563	https://www.genecards.org/cgi-bin/carddisp.pl?gene=TNFSF12
Ulcerative colitis	CAV2	Caveolin 2	Protein Coding	50	GC07P116287	2.29281	https://www.genecards.org/cgi-bin/carddisp.pl?gene=CAV2
Ulcerative colitis	MIR486-1	MicroRNA 486-1	RNA Gene	21	GC08M041660	2.29151	https://www.genecards.org/cgi-bin/carddisp.pl?gene=MIR486-1
Ulcerative colitis	ALK	ALK Receptor Tyrosine Kinase	Protein Coding	59	GC02M029190	2.29017	https://www.genecards.org/cgi-bin/carddisp.pl?gene=ALK
Ulcerative colitis	CYP7A1	Cytochrome P450 Family 7 Subfamily A Member 1	Protein Coding	49	GC08M058476	2.28687	https://www.genecards.org/cgi-bin/carddisp.pl?gene=CYP7A1
Ulcerative colitis	SLC11A2	Solute Carrier Family 11 Member 2	Protein Coding	55	GC12M050952	2.28535	https://www.genecards.org/cgi-bin/carddisp.pl?gene=SLC11A2
Ulcerative colitis	PRG2	Proteoglycan 2, Pro Eosinophil Major Basic Protein	Protein Coding	47	GC11M057386	2.27539	https://www.genecards.org/cgi-bin/carddisp.pl?gene=PRG2
Ulcerative colitis	PLEKHN1	Pleckstrin Homology Domain Containing N1	Protein Coding	37	GC01P000966	2.27492	https://www.genecards.org/cgi-bin/carddisp.pl?gene=PLEKHN1
Ulcerative colitis	TNFSF14	TNF Superfamily Member 14	Protein Coding	48	GC19M007233	2.27471	https://www.genecards.org/cgi-bin/carddisp.pl?gene=TNFSF14
Ulcerative colitis	CBS	Cystathionine Beta-Synthase	Protein Coding	56	GC21M043053	2.27433	https://www.genecards.org/cgi-bin/carddisp.pl?gene=CBS
Ulcerative colitis	LY9	Lymphocyte Antigen 9	Protein Coding	47	GC01P160796	2.27227	https://www.genecards.org/cgi-bin/carddisp.pl?gene=LY9
Ulcerative colitis	RUNX1	RUNX Family Transcription Factor 1	Protein Coding	56	GC21M034787	2.27186	https://www.genecards.org/cgi-bin/carddisp.pl?gene=RUNX1
Ulcerative colitis	IL13RA1	Interleukin 13 Receptor Subunit Alpha 1	Protein Coding	48	GC0XP118727	2.27186	https://www.genecards.org/cgi-bin/carddisp.pl?gene=IL13RA1
Ulcerative colitis	HSPA5	Heat Shock Protein Family A (Hsp70) Member 5	Protein Coding	55	GC09M125234	2.27005	https://www.genecards.org/cgi-bin/carddisp.pl?gene=HSPA5
Ulcerative colitis	USP25	Ubiquitin Specific Peptidase 25	Protein Coding	47	GC21P015730	2.26982	https://www.genecards.org/cgi-bin/carddisp.pl?gene=USP25
Ulcerative colitis	C1orf141	Chromosome 1 Open Reading Frame 141	Protein Coding	34	GC01M067092	2.26608	https://www.genecards.org/cgi-bin/carddisp.pl?gene=C1orf141
Ulcerative colitis	FLI1	Fli-1 Proto-Oncogene, ETS Transcription Factor	Protein Coding	54	GC11P128686	2.26325	https://www.genecards.org/cgi-bin/carddisp.pl?gene=FLI1
Ulcerative colitis	ADH1C	Alcohol Dehydrogenase 1C (Class I), Gamma Polypeptide	Protein Coding	47	GC04M099336	2.26241	https://www.genecards.org/cgi-bin/carddisp.pl?gene=ADH1C
Ulcerative colitis	CFI	Complement Factor I	Protein Coding	54	GC04M109732	2.26054	https://www.genecards.org/cgi-bin/carddisp.pl?gene=CFI
Ulcerative colitis	NGFR	Nerve Growth Factor Receptor	Protein Coding	54	GC17P049495	2.25931	https://www.genecards.org/cgi-bin/carddisp.pl?gene=NGFR
Ulcerative colitis	CBX1	Chromobox 1	Protein Coding	48	GC17M048070	2.25853	https://www.genecards.org/cgi-bin/carddisp.pl?gene=CBX1
Ulcerative colitis	ARG1	Arginase 1	Protein Coding	56	GC06P131473	2.2566	https://www.genecards.org/cgi-bin/carddisp.pl?gene=ARG1
Ulcerative colitis	CHD4	Chromodomain Helicase DNA Binding Protein 4	Protein Coding	51	GC12M006570	2.25516	https://www.genecards.org/cgi-bin/carddisp.pl?gene=CHD4
Ulcerative colitis	ACVRL1	Activin A Receptor Like Type 1	Protein Coding	57	GC12P051906	2.25463	https://www.genecards.org/cgi-bin/carddisp.pl?gene=ACVRL1
Ulcerative colitis	ATP6V1G2	ATPase H+ Transporting V1 Subunit G2	Protein Coding	42	GC06M071724	2.25363	https://www.genecards.org/cgi-bin/carddisp.pl?gene=ATP6V1G2
Ulcerative colitis	CNR1	Cannabinoid Receptor 1	Protein Coding	53	GC06M088139	2.2535	https://www.genecards.org/cgi-bin/carddisp.pl?gene=CNR1
Ulcerative colitis	ADORA2A	Adenosine A2a Receptor	Protein Coding	53	GC22P024417	2.24854	https://www.genecards.org/cgi-bin/carddisp.pl?gene=ADORA2A
Ulcerative colitis	SMOX	Spermine Oxidase	Protein Coding	46	GC20P004120	2.246	https://www.genecards.org/cgi-bin/carddisp.pl?gene=SMOX
Ulcerative colitis	MAP2K2	Mitogen-Activated Protein Kinase Kinase 2	Protein Coding	61	GC19M004090	2.24523	https://www.genecards.org/cgi-bin/carddisp.pl?gene=MAP2K2
Ulcerative colitis	PAK1	P21 (RAC1) Activated Kinase 1	Protein Coding	57	GC11M100100	2.24104	https://www.genecards.org/cgi-bin/carddisp.pl?gene=PAK1
Ulcerative colitis	RAB5A	RAB5A, Member RAS Oncogene Family	Protein Coding	51	GC03P019948	2.2399	https://www.genecards.org/cgi-bin/carddisp.pl?gene=RAB5A
Ulcerative colitis	MFGE8	Milk Fat Globule EGF And Factor V/VIII Domain Containing	Protein Coding	51	GC15M088898	2.23533	https://www.genecards.org/cgi-bin/carddisp.pl?gene=MFGE8
Ulcerative colitis	FEN1	Flap Structure-Specific Endonuclease 1	Protein Coding	53	GC11P061793	2.23497	https://www.genecards.org/cgi-bin/carddisp.pl?gene=FEN1
Ulcerative colitis	TRIM22	Tripartite Motif Containing 22	Protein Coding	46	GC11P005689	2.23413	https://www.genecards.org/cgi-bin/carddisp.pl?gene=TRIM22
Ulcerative colitis	EIF2AK3	Eukaryotic Translation Initiation Factor 2 Alpha Kinase 3	Protein Coding	55	GC02M088556	2.23375	https://www.genecards.org/cgi-bin/carddisp.pl?gene=EIF2AK3
Ulcerative colitis	EDNRB	Endothelin Receptor Type B	Protein Coding	56	GC13M077895	2.23318	https://www.genecards.org/cgi-bin/carddisp.pl?gene=EDNRB
Ulcerative colitis	MIR185	MicroRNA 185	RNA Gene	25	GC22P044371	2.22656	https://www.genecards.org/cgi-bin/carddisp.pl?gene=MIR185
Ulcerative colitis	TOM1	Target Of Myb1 Membrane Trafficking Protein	Protein Coding	49	GC22P035299	2.22557	https://www.genecards.org/cgi-bin/carddisp.pl?gene=TOM1
Ulcerative colitis	F2RL3	F2R Like Thrombin Or Trypsin Receptor 3	Protein Coding	53	GC19P016888	2.22229	https://www.genecards.org/cgi-bin/carddisp.pl?gene=F2RL3
Ulcerative colitis	KIR2DL2	Killer Cell Immunoglobulin Like Receptor, Two Ig Domains And Long Cytoplasmic Tail 2	Protein Coding	30	GC19Mr00108	2.22229	https://www.genecards.org/cgi-bin/carddisp.pl?gene=KIR2DL2
Ulcerative colitis	KIR2DS2	Killer Cell Immunoglobulin Like Receptor, Two Ig Domains And Short Cytoplasmic Tail 2	Protein Coding	29	GC19MR00122	2.22229	https://www.genecards.org/cgi-bin/carddisp.pl?gene=KIR2DS2
Ulcerative colitis	APOA4	Apolipoprotein A4	Protein Coding	48	GC11M116820	2.22015	https://www.genecards.org/cgi-bin/carddisp.pl?gene=APOA4
Ulcerative colitis	CCR2	C-C Motif Chemokine Receptor 2	Protein Coding	52	GC03P047614	2.21946	https://www.genecards.org/cgi-bin/carddisp.pl?gene=CCR2
Ulcerative colitis	RGS14	Regulator Of G Protein Signaling 14	Protein Coding	48	GC05P177357	2.21854	https://www.genecards.org/cgi-bin/carddisp.pl?gene=RGS14
Ulcerative colitis	UBASH3B	Ubiquitin Associated And SH3 Domain Containing B	Protein Coding	48	GC11P122655	2.21812	https://www.genecards.org/cgi-bin/carddisp.pl?gene=UBASH3B
Ulcerative colitis	CUX1	Cut Like Homeobox 1	Protein Coding	51	GC07P101815	2.21802	https://www.genecards.org/cgi-bin/carddisp.pl?gene=CUX1
Ulcerative colitis	GIMAP5	GTPase, IMAP Family Member 5	Protein Coding	44	GC07P150722	2.21734	https://www.genecards.org/cgi-bin/carddisp.pl?gene=GIMAP5
Ulcerative colitis	EPHB2	EPH Receptor B2	Protein Coding	59	GC01P022710	2.21661	https://www.genecards.org/cgi-bin/carddisp.pl?gene=EPHB2
Ulcerative colitis	MIR205	MicroRNA 205	RNA Gene	22	GC01P209432	2.21571	https://www.genecards.org/cgi-bin/carddisp.pl?gene=MIR205
Ulcerative colitis	FOXF1	Forkhead Box F1	Protein Coding	47	GC16P086510	2.21231	https://www.genecards.org/cgi-bin/carddisp.pl?gene=FOXF1
Ulcerative colitis	PNPLA3	Patatin Like Phospholipase Domain Containing 3	Protein Coding	48	GC22P043923	2.21202	https://www.genecards.org/cgi-bin/carddisp.pl?gene=PNPLA3
Ulcerative colitis	G0S2	G0/G1 Switch 2	Protein Coding	39	GC01P209675	2.21166	https://www.genecards.org/cgi-bin/carddisp.pl?gene=G0S2
Ulcerative colitis	ARMH3	Armadillo Like Helical Domain Containing 3	Protein Coding	36	GC10M101846	2.21166	https://www.genecards.org/cgi-bin/carddisp.pl?gene=ARMH3
Ulcerative colitis	TEDC2	Tubulin Epsilon And Delta Complex 2	Protein Coding	36	GC16P013527	2.21166	https://www.genecards.org/cgi-bin/carddisp.pl?gene=TEDC2
Ulcerative colitis	MIR17	MicroRNA 17	RNA Gene	22	GC13P091350	2.21125	https://www.genecards.org/cgi-bin/carddisp.pl?gene=MIR17
Ulcerative colitis	NTF3	Neurotrophin 3	Protein Coding	51	GC12P023503	2.21121	https://www.genecards.org/cgi-bin/carddisp.pl?gene=NTF3
Ulcerative colitis	CD24	CD24 Molecule	Protein Coding	41	GC06M106969	2.21117	https://www.genecards.org/cgi-bin/carddisp.pl?gene=CD24
Ulcerative colitis	NLRP7	NLR Family Pyrin Domain Containing 7	Protein Coding	49	GC19M054923	2.21072	https://www.genecards.org/cgi-bin/carddisp.pl?gene=NLRP7
Ulcerative colitis	CREM	CAMP Responsive Element Modulator	Protein Coding	48	GC10P035126	2.20814	https://www.genecards.org/cgi-bin/carddisp.pl?gene=CREM
Ulcerative colitis	NTAN1	N-Terminal Asparagine Amidase	Protein Coding	44	GC16M015037	2.20282	https://www.genecards.org/cgi-bin/carddisp.pl?gene=NTAN1
Ulcerative colitis	MLKL	Mixed Lineage Kinase Domain Like Pseudokinase	Protein Coding	49	GC16M074672	2.20194	https://www.genecards.org/cgi-bin/carddisp.pl?gene=MLKL
Ulcerative colitis	PFKM	Phosphofructokinase, Muscle	Protein Coding	56	GC12P048105	2.20084	https://www.genecards.org/cgi-bin/carddisp.pl?gene=PFKM
Ulcerative colitis	IL34	Interleukin 34	Protein Coding	46	GC16P072313	2.19832	https://www.genecards.org/cgi-bin/carddisp.pl?gene=IL34
Ulcerative colitis	KHDRBS1	KH RNA Binding Domain Containing, Signal Transduction Associated 1	Protein Coding	47	GC01P032013	2.19807	https://www.genecards.org/cgi-bin/carddisp.pl?gene=KHDRBS1
Ulcerative colitis	PGF	Placental Growth Factor	Protein Coding	50	GC14M074941	2.19585	https://www.genecards.org/cgi-bin/carddisp.pl?gene=PGF
Ulcerative colitis	TXK	TXK Tyrosine Kinase	Protein Coding	51	GC04M048066	2.19524	https://www.genecards.org/cgi-bin/carddisp.pl?gene=TXK
Ulcerative colitis	EFNB2	Ephrin B2	Protein Coding	50	GC13M106489	2.19483	https://www.genecards.org/cgi-bin/carddisp.pl?gene=EFNB2
Ulcerative colitis	BCL3	BCL3 Transcription Coactivator	Protein Coding	48	GC19P044747	2.19462	https://www.genecards.org/cgi-bin/carddisp.pl?gene=BCL3
Ulcerative colitis	SSR2	Signal Sequence Receptor Subunit 2	Protein Coding	46	GC01M156009	2.19266	https://www.genecards.org/cgi-bin/carddisp.pl?gene=SSR2
Ulcerative colitis	SERPINF1	Serpin Family F Member 1	Protein Coding	53	GC17P001766	2.19116	https://www.genecards.org/cgi-bin/carddisp.pl?gene=SERPINF1
Ulcerative colitis	LMAN1	Lectin, Mannose Binding 1	Protein Coding	52	GC18M059327	2.19116	https://www.genecards.org/cgi-bin/carddisp.pl?gene=LMAN1
Ulcerative colitis	GTF2E2	General Transcription Factor IIE Subunit 2	Protein Coding	50	GC08M030578	2.19116	https://www.genecards.org/cgi-bin/carddisp.pl?gene=GTF2E2
Ulcerative colitis	CADM2	Cell Adhesion Molecule 2	Protein Coding	47	GC03P084961	2.19116	https://www.genecards.org/cgi-bin/carddisp.pl?gene=CADM2
Ulcerative colitis	APBA1	Amyloid Beta Precursor Protein Binding Family A Member 1	Protein Coding	46	GC09M069427	2.19116	https://www.genecards.org/cgi-bin/carddisp.pl?gene=APBA1
Ulcerative colitis	GAS7	Growth Arrest Specific 7	Protein Coding	46	GC17M009910	2.19116	https://www.genecards.org/cgi-bin/carddisp.pl?gene=GAS7
Ulcerative colitis	PSD	Pleckstrin And Sec7 Domain Containing	Protein Coding	46	GC10M102403	2.19116	https://www.genecards.org/cgi-bin/carddisp.pl?gene=PSD
Ulcerative colitis	WASHC4	WASH Complex Subunit 4	Protein Coding	40	GC12P105108	2.19116	https://www.genecards.org/cgi-bin/carddisp.pl?gene=WASHC4
Ulcerative colitis	S100Z	S100 Calcium Binding Protein Z	Protein Coding	38	GC05P076850	2.19116	https://www.genecards.org/cgi-bin/carddisp.pl?gene=S100Z
Ulcerative colitis	PRAC2	PRAC2 Small Nuclear Protein	Protein Coding	25	GC17P062829	2.19116	https://www.genecards.org/cgi-bin/carddisp.pl?gene=PRAC2
Ulcerative colitis	RDX	Radixin	Protein Coding	53	GC11M109864	2.1903	https://www.genecards.org/cgi-bin/carddisp.pl?gene=RDX
Ulcerative colitis	MIR30C1	MicroRNA 30c-1	RNA Gene	24	GC01P040757	2.19017	https://www.genecards.org/cgi-bin/carddisp.pl?gene=MIR30C1
Ulcerative colitis	ITGB7	Integrin Subunit Beta 7	Protein Coding	52	GC12M053191	2.18911	https://www.genecards.org/cgi-bin/carddisp.pl?gene=ITGB7
Ulcerative colitis	ASH1L	ASH1 Like Histone Lysine Methyltransferase	Protein Coding	45	GC01M155335	2.17871	https://www.genecards.org/cgi-bin/carddisp.pl?gene=ASH1L
Ulcerative colitis	NDRG1	N-Myc Downstream Regulated 1	Protein Coding	52	GC08M133237	2.17522	https://www.genecards.org/cgi-bin/carddisp.pl?gene=NDRG1
Ulcerative colitis	SLC3A2	Solute Carrier Family 3 Member 2	Protein Coding	50	GC11P062856	2.17421	https://www.genecards.org/cgi-bin/carddisp.pl?gene=SLC3A2
Ulcerative colitis	CTNND1	Catenin Delta 1	Protein Coding	52	GC11P058206	2.16651	https://www.genecards.org/cgi-bin/carddisp.pl?gene=CTNND1
Ulcerative colitis	LBP	Lipopolysaccharide Binding Protein	Protein Coding	51	GC20P038346	2.16626	https://www.genecards.org/cgi-bin/carddisp.pl?gene=LBP
Ulcerative colitis	SELENOP	Selenoprotein P	Protein Coding	43	GC05M042800	2.16237	https://www.genecards.org/cgi-bin/carddisp.pl?gene=SELENOP
Ulcerative colitis	PYCARD	PYD And CARD Domain Containing	Protein Coding	48	GC16M031201	2.16207	https://www.genecards.org/cgi-bin/carddisp.pl?gene=PYCARD
Ulcerative colitis	GSDMA	Gasdermin A	Protein Coding	42	GC17P061880	2.15865	https://www.genecards.org/cgi-bin/carddisp.pl?gene=GSDMA
Ulcerative colitis	YAP1	Yes1 Associated Transcriptional Regulator	Protein Coding	55	GC11P102110	2.15702	https://www.genecards.org/cgi-bin/carddisp.pl?gene=YAP1
Ulcerative colitis	FLG	Filaggrin	Protein Coding	47	GC01M152828	2.15575	https://www.genecards.org/cgi-bin/carddisp.pl?gene=FLG
Ulcerative colitis	MTMR3	Myotubularin Related Protein 3	Protein Coding	50	GC22P044809	2.15486	https://www.genecards.org/cgi-bin/carddisp.pl?gene=MTMR3
Ulcerative colitis	SULT1A2	Sulfotransferase Family 1A Member 2	Protein Coding	48	GC16M028591	2.15486	https://www.genecards.org/cgi-bin/carddisp.pl?gene=SULT1A2
Ulcerative colitis	HORMAD2	HORMA Domain Containing 2	Protein Coding	40	GC22P044813	2.15486	https://www.genecards.org/cgi-bin/carddisp.pl?gene=HORMAD2
Ulcerative colitis	KIR2DL1	Killer Cell Immunoglobulin Like Receptor, Two Ig Domains And Long Cytoplasmic Tail 1	Protein Coding	42	GC19P073500	2.15405	https://www.genecards.org/cgi-bin/carddisp.pl?gene=KIR2DL1
Ulcerative colitis	RBP4	Retinol Binding Protein 4	Protein Coding	52	GC10M093591	2.15343	https://www.genecards.org/cgi-bin/carddisp.pl?gene=RBP4
Ulcerative colitis	RHOH	Ras Homolog Family Member H	Protein Coding	51	GC04P040192	2.15102	https://www.genecards.org/cgi-bin/carddisp.pl?gene=RHOH
Ulcerative colitis	PTGDR2	Prostaglandin D2 Receptor 2	Protein Coding	51	GC11M060850	2.14306	https://www.genecards.org/cgi-bin/carddisp.pl?gene=PTGDR2
Ulcerative colitis	ETS2	ETS Proto-Oncogene 2, Transcription Factor	Protein Coding	48	GC21P038805	2.14204	https://www.genecards.org/cgi-bin/carddisp.pl?gene=ETS2
Ulcerative colitis	IL1F10	Interleukin 1 Family Member 10	Protein Coding	44	GC02P113067	2.1416	https://www.genecards.org/cgi-bin/carddisp.pl?gene=IL1F10
Ulcerative colitis	RHOB	Ras Homolog Family Member B	Protein Coding	51	GC02P020447	2.1399	https://www.genecards.org/cgi-bin/carddisp.pl?gene=RHOB
Ulcerative colitis	ITK	IL2 Inducible T Cell Kinase	Protein Coding	59	GC05P157158	2.13634	https://www.genecards.org/cgi-bin/carddisp.pl?gene=ITK
Ulcerative colitis	ACTC1	Actin Alpha Cardiac Muscle 1	Protein Coding	51	GC15M034790	2.1361	https://www.genecards.org/cgi-bin/carddisp.pl?gene=ACTC1
Ulcerative colitis	TERF2	Telomeric Repeat Binding Factor 2	Protein Coding	48	GC16M069355	2.13593	https://www.genecards.org/cgi-bin/carddisp.pl?gene=TERF2
Ulcerative colitis	PRKN	Parkin RBR E3 Ubiquitin Protein Ligase	Protein Coding	53	GC06M161348	2.13552	https://www.genecards.org/cgi-bin/carddisp.pl?gene=PRKN
Ulcerative colitis	MMP11	Matrix Metallopeptidase 11	Protein Coding	51	GC22P023768	2.13243	https://www.genecards.org/cgi-bin/carddisp.pl?gene=MMP11
Ulcerative colitis	MIR129-1	MicroRNA 129-1	RNA Gene	19	GC07P128207	2.13142	https://www.genecards.org/cgi-bin/carddisp.pl?gene=MIR129-1
Ulcerative colitis	HDAC1	Histone Deacetylase 1	Protein Coding	57	GC01P032292	2.129	https://www.genecards.org/cgi-bin/carddisp.pl?gene=HDAC1
Ulcerative colitis	MIR642A	MicroRNA 642a	RNA Gene	19	GC19P045674	2.12897	https://www.genecards.org/cgi-bin/carddisp.pl?gene=MIR642A
Ulcerative colitis	CFHR2	Complement Factor H Related 2	Protein Coding	45	GC01P196943	2.12783	https://www.genecards.org/cgi-bin/carddisp.pl?gene=CFHR2
Ulcerative colitis	COL5A1	Collagen Type V Alpha 1 Chain	Protein Coding	53	GC09P134641	2.12606	https://www.genecards.org/cgi-bin/carddisp.pl?gene=COL5A1
Ulcerative colitis	KLKB1	Kallikrein B1	Protein Coding	53	GC04P186225	2.12245	https://www.genecards.org/cgi-bin/carddisp.pl?gene=KLKB1
Ulcerative colitis	APOB	Apolipoprotein B	Protein Coding	53	GC02M020956	2.12157	https://www.genecards.org/cgi-bin/carddisp.pl?gene=APOB
Ulcerative colitis	MIR423	MicroRNA 423	RNA Gene	21	GC17P030117	2.12143	https://www.genecards.org/cgi-bin/carddisp.pl?gene=MIR423
Ulcerative colitis	LAG3	Lymphocyte Activating 3	Protein Coding	48	GC12P023550	2.11945	https://www.genecards.org/cgi-bin/carddisp.pl?gene=LAG3
Ulcerative colitis	TMPO	Thymopoietin	Protein Coding	53	GC12P098515	2.11868	https://www.genecards.org/cgi-bin/carddisp.pl?gene=TMPO
Ulcerative colitis	VDAC1	Voltage Dependent Anion Channel 1	Protein Coding	53	GC05M133975	2.11672	https://www.genecards.org/cgi-bin/carddisp.pl?gene=VDAC1
Ulcerative colitis	KDM4C	Lysine Demethylase 4C	Protein Coding	48	GC09P006720	2.11275	https://www.genecards.org/cgi-bin/carddisp.pl?gene=KDM4C
Ulcerative colitis	CORO1A	Coronin 1A	Protein Coding	51	GC16P042764	2.11189	https://www.genecards.org/cgi-bin/carddisp.pl?gene=CORO1A
Ulcerative colitis	MAPRE1	Microtubule Associated Protein RP/EB Family Member 1	Protein Coding	51	GC20P032819	2.10654	https://www.genecards.org/cgi-bin/carddisp.pl?gene=MAPRE1
Ulcerative colitis	GPANK1	G-Patch Domain And Ankyrin Repeats 1	Protein Coding	41	GC06M071730	2.10231	https://www.genecards.org/cgi-bin/carddisp.pl?gene=GPANK1
Ulcerative colitis	PTGIR	Prostaglandin I2 Receptor	Protein Coding	54	GC19M070781	2.10046	https://www.genecards.org/cgi-bin/carddisp.pl?gene=PTGIR
Ulcerative colitis	RIPK3	Receptor Interacting Serine/Threonine Kinase 3	Protein Coding	50	GC14M024336	2.09961	https://www.genecards.org/cgi-bin/carddisp.pl?gene=RIPK3
Ulcerative colitis	STK11	Serine/Threonine Kinase 11	Protein Coding	57	GC19P001177	2.09948	https://www.genecards.org/cgi-bin/carddisp.pl?gene=STK11
Ulcerative colitis	MIR133A1	MicroRNA 133a-1	RNA Gene	19	GC18M027630	2.09905	https://www.genecards.org/cgi-bin/carddisp.pl?gene=MIR133A1
Ulcerative colitis	RBPJ	Recombination Signal Binding Protein For Immunoglobulin Kappa J Region	Protein Coding	53	GC04P026105	2.09814	https://www.genecards.org/cgi-bin/carddisp.pl?gene=RBPJ
Ulcerative colitis	EZR	Ezrin	Protein Coding	53	GC06M158765	2.09762	https://www.genecards.org/cgi-bin/carddisp.pl?gene=EZR
Ulcerative colitis	GOLGB1	Golgin B1	Protein Coding	42	GC03M121663	2.09671	https://www.genecards.org/cgi-bin/carddisp.pl?gene=GOLGB1
Ulcerative colitis	PMEL	Premelanosome Protein	Protein Coding	49	GC12M055954	2.09579	https://www.genecards.org/cgi-bin/carddisp.pl?gene=PMEL
Ulcerative colitis	LALBA	Lactalbumin Alpha	Protein Coding	45	GC12M048567	2.09223	https://www.genecards.org/cgi-bin/carddisp.pl?gene=LALBA
Ulcerative colitis	MIR191	MicroRNA 191	RNA Gene	24	GC03M051545	2.09122	https://www.genecards.org/cgi-bin/carddisp.pl?gene=MIR191
Ulcerative colitis	MAP3K8	Mitogen-Activated Protein Kinase Kinase Kinase 8	Protein Coding	53	GC10P030533	2.08712	https://www.genecards.org/cgi-bin/carddisp.pl?gene=MAP3K8
Ulcerative colitis	KCNN4	Potassium Calcium-Activated Channel Subfamily N Member 4	Protein Coding	55	GC19M070686	2.08629	https://www.genecards.org/cgi-bin/carddisp.pl?gene=KCNN4
Ulcerative colitis	DSG1	Desmoglein 1	Protein Coding	49	GC18P031318	2.08588	https://www.genecards.org/cgi-bin/carddisp.pl?gene=DSG1
Ulcerative colitis	HLA-DQA2	Major Histocompatibility Complex, Class II, DQ Alpha 2	Protein Coding	43	GC06P032741	2.08531	https://www.genecards.org/cgi-bin/carddisp.pl?gene=HLA-DQA2
Ulcerative colitis	TICAM1	TIR Domain Containing Adaptor Molecule 1	Protein Coding	50	GC19M004815	2.08314	https://www.genecards.org/cgi-bin/carddisp.pl?gene=TICAM1
Ulcerative colitis	SPINK1	Serine Peptidase Inhibitor Kazal Type 1	Protein Coding	48	GC05M147825	2.08242	https://www.genecards.org/cgi-bin/carddisp.pl?gene=SPINK1
Ulcerative colitis	IL17C	Interleukin 17C	Protein Coding	44	GC16P088638	2.07968	https://www.genecards.org/cgi-bin/carddisp.pl?gene=IL17C
Ulcerative colitis	IFNAR2	Interferon Alpha And Beta Receptor Subunit 2	Protein Coding	56	GC21P033229	2.07862	https://www.genecards.org/cgi-bin/carddisp.pl?gene=IFNAR2
Ulcerative colitis	ARRB1	Arrestin Beta 1	Protein Coding	51	GC11M100029	2.07829	https://www.genecards.org/cgi-bin/carddisp.pl?gene=ARRB1
Ulcerative colitis	DOCK2	Dedicator Of Cytokinesis 2	Protein Coding	51	GC05P169637	2.07767	https://www.genecards.org/cgi-bin/carddisp.pl?gene=DOCK2
Ulcerative colitis	GAS5	Growth Arrest Specific 5	RNA Gene	26	GC01M173947	2.07696	https://www.genecards.org/cgi-bin/carddisp.pl?gene=GAS5
Ulcerative colitis	PHOX2B	Paired Like Homeobox 2B	Protein Coding	51	GC04M041746	2.07372	https://www.genecards.org/cgi-bin/carddisp.pl?gene=PHOX2B
Ulcerative colitis	CIBAR2	CBY1 Interacting BAR Domain Containing 2	Protein Coding	37	GC16M085099	2.07372	https://www.genecards.org/cgi-bin/carddisp.pl?gene=CIBAR2
Ulcerative colitis	STK39	Serine/Threonine Kinase 39	Protein Coding	50	GC02M167954	2.06837	https://www.genecards.org/cgi-bin/carddisp.pl?gene=STK39
Ulcerative colitis	PROC	Protein C, Inactivator Of Coagulation Factors Va And VIIIa	Protein Coding	57	GC02P127418	2.06755	https://www.genecards.org/cgi-bin/carddisp.pl?gene=PROC
Ulcerative colitis	MMP26	Matrix Metallopeptidase 26	Protein Coding	42	GC11P004706	2.06619	https://www.genecards.org/cgi-bin/carddisp.pl?gene=MMP26
Ulcerative colitis	MAPT	Microtubule Associated Protein Tau	Protein Coding	57	GC17P045894	2.06365	https://www.genecards.org/cgi-bin/carddisp.pl?gene=MAPT
Ulcerative colitis	MCCD1	Mitochondrial Coiled-Coil Domain 1	Protein Coding	34	GC06P031528	2.06231	https://www.genecards.org/cgi-bin/carddisp.pl?gene=MCCD1
Ulcerative colitis	SERPINB2	Serpin Family B Member 2	Protein Coding	50	GC18P063871	2.06075	https://www.genecards.org/cgi-bin/carddisp.pl?gene=SERPINB2
Ulcerative colitis	CRHR1	Corticotropin Releasing Hormone Receptor 1	Protein Coding	51	GC17P045784	2.05958	https://www.genecards.org/cgi-bin/carddisp.pl?gene=CRHR1
Ulcerative colitis	PLIN2	Perilipin 2	Protein Coding	48	GC09M019184	2.05744	https://www.genecards.org/cgi-bin/carddisp.pl?gene=PLIN2
Ulcerative colitis	RASSF5	Ras Association Domain Family Member 5	Protein Coding	45	GC01P206507	2.05706	https://www.genecards.org/cgi-bin/carddisp.pl?gene=RASSF5
Ulcerative colitis	NEU1	Neuraminidase 1	Protein Coding	52	GC06M031857	2.05624	https://www.genecards.org/cgi-bin/carddisp.pl?gene=NEU1
Ulcerative colitis	FOXO3	Forkhead Box O3	Protein Coding	53	GC06P108559	2.05619	https://www.genecards.org/cgi-bin/carddisp.pl?gene=FOXO3
Ulcerative colitis	EIF2S1	Eukaryotic Translation Initiation Factor 2 Subunit Alpha	Protein Coding	50	GC14P067359	2.05525	https://www.genecards.org/cgi-bin/carddisp.pl?gene=EIF2S1
Ulcerative colitis	ZNF354B	Zinc Finger Protein 354B	Protein Coding	38	GC05P178859	2.05369	https://www.genecards.org/cgi-bin/carddisp.pl?gene=ZNF354B
Ulcerative colitis	SLC39A8	Solute Carrier Family 39 Member 8	Protein Coding	52	GC04M102252	2.05295	https://www.genecards.org/cgi-bin/carddisp.pl?gene=SLC39A8
Ulcerative colitis	S100A1	S100 Calcium Binding Protein A1	Protein Coding	47	GC01P153627	2.05269	https://www.genecards.org/cgi-bin/carddisp.pl?gene=S100A1
Ulcerative colitis	KL	Klotho	Protein Coding	54	GC13P033016	2.05254	https://www.genecards.org/cgi-bin/carddisp.pl?gene=KL
Ulcerative colitis	NRM	Nurim	Protein Coding	39	GC06M071643	2.05208	https://www.genecards.org/cgi-bin/carddisp.pl?gene=NRM
Ulcerative colitis	LAMP1	Lysosomal Associated Membrane Protein 1	Protein Coding	50	GC13P113297	2.05156	https://www.genecards.org/cgi-bin/carddisp.pl?gene=LAMP1
Ulcerative colitis	ALPK1	Alpha Kinase 1	Protein Coding	47	GC04P112285	2.04904	https://www.genecards.org/cgi-bin/carddisp.pl?gene=ALPK1
Ulcerative colitis	JAG1	Jagged Canonical Notch Ligand 1	Protein Coding	58	GC20M010637	2.04741	https://www.genecards.org/cgi-bin/carddisp.pl?gene=JAG1
Ulcerative colitis	AQP7	Aquaporin 7	Protein Coding	50	GC09M033384	2.0456	https://www.genecards.org/cgi-bin/carddisp.pl?gene=AQP7
Ulcerative colitis	CTBP1	C-Terminal Binding Protein 1	Protein Coding	53	GC04M001211	2.04481	https://www.genecards.org/cgi-bin/carddisp.pl?gene=CTBP1
Ulcerative colitis	CGN	Cingulin	Protein Coding	43	GC01P151483	2.04408	https://www.genecards.org/cgi-bin/carddisp.pl?gene=CGN
Ulcerative colitis	VEGFC	Vascular Endothelial Growth Factor C	Protein Coding	53	GC04M176683	2.04156	https://www.genecards.org/cgi-bin/carddisp.pl?gene=VEGFC
Ulcerative colitis	MIR452	MicroRNA 452	RNA Gene	18	GC0XM151959	2.04133	https://www.genecards.org/cgi-bin/carddisp.pl?gene=MIR452
Ulcerative colitis	ADAM15	ADAM Metallopeptidase Domain 15	Protein Coding	51	GC01P155050	2.04096	https://www.genecards.org/cgi-bin/carddisp.pl?gene=ADAM15
Ulcerative colitis	COL4A1	Collagen Type IV Alpha 1 Chain	Protein Coding	55	GC13M110148	2.03924	https://www.genecards.org/cgi-bin/carddisp.pl?gene=COL4A1
Ulcerative colitis	MSN	Moesin	Protein Coding	55	GC0XP065588	2.03878	https://www.genecards.org/cgi-bin/carddisp.pl?gene=MSN
Ulcerative colitis	MAML2	Mastermind Like Transcriptional Coactivator 2	Protein Coding	44	GC11M095976	2.03768	https://www.genecards.org/cgi-bin/carddisp.pl?gene=MAML2
Ulcerative colitis	CPOX	Coproporphyrinogen Oxidase	Protein Coding	51	GC03M098576	2.03676	https://www.genecards.org/cgi-bin/carddisp.pl?gene=CPOX
Ulcerative colitis	XK	X-Linked Kx Blood Group Antigen, Kell And VPS13A Binding Protein	Protein Coding	47	GC0XP037685	2.0367	https://www.genecards.org/cgi-bin/carddisp.pl?gene=XK
Ulcerative colitis	PSMB10	Proteasome 20S Subunit Beta 10	Protein Coding	51	GC16M067937	2.03397	https://www.genecards.org/cgi-bin/carddisp.pl?gene=PSMB10
Ulcerative colitis	MIR10B	MicroRNA 10b	RNA Gene	24	GC02P176150	2.03347	https://www.genecards.org/cgi-bin/carddisp.pl?gene=MIR10B
Ulcerative colitis	IRF3	Interferon Regulatory Factor 3	Protein Coding	51	GC19M049659	2.02844	https://www.genecards.org/cgi-bin/carddisp.pl?gene=IRF3
Ulcerative colitis	P2RX3	Purinergic Receptor P2X 3	Protein Coding	50	GC11P057356	2.02807	https://www.genecards.org/cgi-bin/carddisp.pl?gene=P2RX3
Ulcerative colitis	SLC22A2	Solute Carrier Family 22 Member 2	Protein Coding	50	GC06M160195	2.02541	https://www.genecards.org/cgi-bin/carddisp.pl?gene=SLC22A2
Ulcerative colitis	HSF1	Heat Shock Transcription Factor 1	Protein Coding	53	GC08P144291	2.02264	https://www.genecards.org/cgi-bin/carddisp.pl?gene=HSF1
Ulcerative colitis	LDHA	Lactate Dehydrogenase A	Protein Coding	57	GC11P018394	2.01803	https://www.genecards.org/cgi-bin/carddisp.pl?gene=LDHA
Ulcerative colitis	TMPRSS6	Transmembrane Serine Protease 6	Protein Coding	51	GC22M061458	2.01721	https://www.genecards.org/cgi-bin/carddisp.pl?gene=TMPRSS6
Ulcerative colitis	MAGT1	Magnesium Transporter 1	Protein Coding	48	GC0XM078045	2.0156	https://www.genecards.org/cgi-bin/carddisp.pl?gene=MAGT1
Ulcerative colitis	NDUFA13	NADH:Ubiquinone Oxidoreductase Subunit A13	Protein Coding	50	GC19P019515	2.01216	https://www.genecards.org/cgi-bin/carddisp.pl?gene=NDUFA13
Ulcerative colitis	CCL8	C-C Motif Chemokine Ligand 8	Protein Coding	46	GC17P034319	2.01118	https://www.genecards.org/cgi-bin/carddisp.pl?gene=CCL8
Ulcerative colitis	E2F1	E2F Transcription Factor 1	Protein Coding	50	GC20M033675	2.00825	https://www.genecards.org/cgi-bin/carddisp.pl?gene=E2F1
Ulcerative colitis	SETDB1	SET Domain Bifurcated Histone Lysine Methyltransferase 1	Protein Coding	49	GC01P150926	2.00636	https://www.genecards.org/cgi-bin/carddisp.pl?gene=SETDB1
Ulcerative colitis	FIP1L1	Factor Interacting With PAPOLA And CPSF1	Protein Coding	47	GC04P053435	2.00393	https://www.genecards.org/cgi-bin/carddisp.pl?gene=FIP1L1
Ulcerative colitis	PVT1	Pvt1 Oncogene	RNA Gene	28	GC08P127884	2.00129	https://www.genecards.org/cgi-bin/carddisp.pl?gene=PVT1
Ulcerative colitis	LTBR	Lymphotoxin Beta Receptor	Protein Coding	48	GC12P006375	2.00063	https://www.genecards.org/cgi-bin/carddisp.pl?gene=LTBR
Ulcerative colitis	LY96	Lymphocyte Antigen 96	Protein Coding	51	GC08P073991	1.99875	https://www.genecards.org/cgi-bin/carddisp.pl?gene=LY96
Ulcerative colitis	SASH1	SAM And SH3 Domain Containing 1	Protein Coding	46	GC06P148193	1.99825	https://www.genecards.org/cgi-bin/carddisp.pl?gene=SASH1
Ulcerative colitis	CIRBP	Cold Inducible RNA Binding Protein	Protein Coding	44	GC19P001259	1.99404	https://www.genecards.org/cgi-bin/carddisp.pl?gene=CIRBP
Ulcerative colitis	CD3D	CD3 Delta Subunit Of T-Cell Receptor Complex	Protein Coding	54	GC11M118338	1.98995	https://www.genecards.org/cgi-bin/carddisp.pl?gene=CD3D
Ulcerative colitis	SLC37A1	Solute Carrier Family 37 Member 1	Protein Coding	45	GC21P042580	1.9874	https://www.genecards.org/cgi-bin/carddisp.pl?gene=SLC37A1
Ulcerative colitis	FAP	Fibroblast Activation Protein Alpha	Protein Coding	52	GC02M162170	1.9847	https://www.genecards.org/cgi-bin/carddisp.pl?gene=FAP
Ulcerative colitis	DDC	Dopa Decarboxylase	Protein Coding	57	GC07M050458	1.98349	https://www.genecards.org/cgi-bin/carddisp.pl?gene=DDC
Ulcerative colitis	TG	Thyroglobulin	Protein Coding	51	GC08P132866	1.9831	https://www.genecards.org/cgi-bin/carddisp.pl?gene=TG
Ulcerative colitis	ABCC3	ATP Binding Cassette Subfamily C Member 3	Protein Coding	53	GC17P050634	1.98304	https://www.genecards.org/cgi-bin/carddisp.pl?gene=ABCC3
Ulcerative colitis	TP73	Tumor Protein P73	Protein Coding	52	GC01P003652	1.983	https://www.genecards.org/cgi-bin/carddisp.pl?gene=TP73
Ulcerative colitis	DLAT	Dihydrolipoamide S-Acetyltransferase	Protein Coding	53	GC11P112026	1.98151	https://www.genecards.org/cgi-bin/carddisp.pl?gene=DLAT
Ulcerative colitis	CD160	CD160 Molecule	Protein Coding	48	GC01P145719	1.9793	https://www.genecards.org/cgi-bin/carddisp.pl?gene=CD160
Ulcerative colitis	DSG2	Desmoglein 2	Protein Coding	52	GC18P031498	1.97909	https://www.genecards.org/cgi-bin/carddisp.pl?gene=DSG2
Ulcerative colitis	RECK	Reversion Inducing Cysteine Rich Protein With Kazal Motifs	Protein Coding	47	GC09P036036	1.97433	https://www.genecards.org/cgi-bin/carddisp.pl?gene=RECK
Ulcerative colitis	ALDOB	Aldolase, Fructose-Bisphosphate B	Protein Coding	52	GC09M101420	1.9735	https://www.genecards.org/cgi-bin/carddisp.pl?gene=ALDOB
Ulcerative colitis	SLC6A14	Solute Carrier Family 6 Member 14	Protein Coding	48	GC0XP116436	1.9735	https://www.genecards.org/cgi-bin/carddisp.pl?gene=SLC6A14
Ulcerative colitis	PYGO2	Pygopus Family PHD Finger 2	Protein Coding	43	GC01M154957	1.9728	https://www.genecards.org/cgi-bin/carddisp.pl?gene=PYGO2
Ulcerative colitis	HTRA1	HtrA Serine Peptidase 1	Protein Coding	52	GC10P122461	1.97077	https://www.genecards.org/cgi-bin/carddisp.pl?gene=HTRA1
Ulcerative colitis	OSM	Oncostatin M	Protein Coding	50	GC22M030262	1.96812	https://www.genecards.org/cgi-bin/carddisp.pl?gene=OSM
Ulcerative colitis	RNF5	Ring Finger Protein 5	Protein Coding	47	GC06P092179	1.96338	https://www.genecards.org/cgi-bin/carddisp.pl?gene=RNF5
Ulcerative colitis	LRG1	Leucine Rich Alpha-2-Glycoprotein 1	Protein Coding	46	GC19M006864	1.96291	https://www.genecards.org/cgi-bin/carddisp.pl?gene=LRG1
Ulcerative colitis	NOX3	NADPH Oxidase 3	Protein Coding	48	GC06M155395	1.96172	https://www.genecards.org/cgi-bin/carddisp.pl?gene=NOX3
Ulcerative colitis	CEACAM1	CEA Cell Adhesion Molecule 1	Protein Coding	51	GC19M042507	1.95982	https://www.genecards.org/cgi-bin/carddisp.pl?gene=CEACAM1
Ulcerative colitis	DEFA6	Defensin Alpha 6	Protein Coding	41	GC08M006924	1.95638	https://www.genecards.org/cgi-bin/carddisp.pl?gene=DEFA6
Ulcerative colitis	EPHA3	EPH Receptor A3	Protein Coding	53	GC03P089077	1.95515	https://www.genecards.org/cgi-bin/carddisp.pl?gene=EPHA3
Ulcerative colitis	CNTF	Ciliary Neurotrophic Factor	Protein Coding	47	GC11P058622	1.95375	https://www.genecards.org/cgi-bin/carddisp.pl?gene=CNTF
Ulcerative colitis	EVPL	Envoplakin	Protein Coding	43	GC17M076004	1.9515	https://www.genecards.org/cgi-bin/carddisp.pl?gene=EVPL
Ulcerative colitis	RNF128	Ring Finger Protein 128	Protein Coding	45	GC0XP106693	1.94551	https://www.genecards.org/cgi-bin/carddisp.pl?gene=RNF128
Ulcerative colitis	PRSS8	Serine Protease 8	Protein Coding	51	GC16M038551	1.9426	https://www.genecards.org/cgi-bin/carddisp.pl?gene=PRSS8
Ulcerative colitis	SULT1A3	Sulfotransferase Family 1A Member 3	Protein Coding	43	GC16P030199	1.94225	https://www.genecards.org/cgi-bin/carddisp.pl?gene=SULT1A3
Ulcerative colitis	KHDRBS3	KH RNA Binding Domain Containing, Signal Transduction Associated 3	Protein Coding	45	GC08P135457	1.94167	https://www.genecards.org/cgi-bin/carddisp.pl?gene=KHDRBS3
Ulcerative colitis	AOC3	Amine Oxidase Copper Containing 3	Protein Coding	52	GC17P042851	1.93657	https://www.genecards.org/cgi-bin/carddisp.pl?gene=AOC3
Ulcerative colitis	PLCL1	Phospholipase C Like 1 (Inactive)	Protein Coding	46	GC02P197804	1.93632	https://www.genecards.org/cgi-bin/carddisp.pl?gene=PLCL1
Ulcerative colitis	ARHGAP45	Rho GTPase Activating Protein 45	Protein Coding	44	GC19P001065	1.93632	https://www.genecards.org/cgi-bin/carddisp.pl?gene=ARHGAP45
Ulcerative colitis	RMI2	RecQ Mediated Genome Instability 2	Protein Coding	40	GC16P013745	1.93632	https://www.genecards.org/cgi-bin/carddisp.pl?gene=RMI2
Ulcerative colitis	MIR211	MicroRNA 211	RNA Gene	24	GC15M031065	1.93506	https://www.genecards.org/cgi-bin/carddisp.pl?gene=MIR211
Ulcerative colitis	MIR23A	MicroRNA 23a	RNA Gene	23	GC19M014657	1.93506	https://www.genecards.org/cgi-bin/carddisp.pl?gene=MIR23A
Ulcerative colitis	MIR296	MicroRNA 296	RNA Gene	21	GC20M058817	1.93506	https://www.genecards.org/cgi-bin/carddisp.pl?gene=MIR296
Ulcerative colitis	MIR338	MicroRNA 338	RNA Gene	21	GC17M081135	1.93506	https://www.genecards.org/cgi-bin/carddisp.pl?gene=MIR338
Ulcerative colitis	FOXO1	Forkhead Box O1	Protein Coding	56	GC13M040555	1.93505	https://www.genecards.org/cgi-bin/carddisp.pl?gene=FOXO1
Ulcerative colitis	ADCY7	Adenylate Cyclase 7	Protein Coding	52	GC16P050244	1.93341	https://www.genecards.org/cgi-bin/carddisp.pl?gene=ADCY7
Ulcerative colitis	ATXN2L	Ataxin 2 Like	Protein Coding	46	GC16P042642	1.93341	https://www.genecards.org/cgi-bin/carddisp.pl?gene=ATXN2L
Ulcerative colitis	TM9SF4	Transmembrane 9 Superfamily Member 4	Protein Coding	43	GC20P032109	1.93341	https://www.genecards.org/cgi-bin/carddisp.pl?gene=TM9SF4
Ulcerative colitis	UGT1A7	UDP Glucuronosyltransferase Family 1 Member A7	Protein Coding	47	GC02P233681	1.93299	https://www.genecards.org/cgi-bin/carddisp.pl?gene=UGT1A7
Ulcerative colitis	CASP5	Caspase 5	Protein Coding	50	GC11M104995	1.93123	https://www.genecards.org/cgi-bin/carddisp.pl?gene=CASP5
Ulcerative colitis	CXCL11	C-X-C Motif Chemokine Ligand 11	Protein Coding	48	GC04M076033	1.92569	https://www.genecards.org/cgi-bin/carddisp.pl?gene=CXCL11
Ulcerative colitis	IRS2	Insulin Receptor Substrate 2	Protein Coding	51	GC13M109752	1.92278	https://www.genecards.org/cgi-bin/carddisp.pl?gene=IRS2
Ulcerative colitis	ITIH4	Inter-Alpha-Trypsin Inhibitor Heavy Chain 4	Protein Coding	50	GC03M052812	1.92261	https://www.genecards.org/cgi-bin/carddisp.pl?gene=ITIH4
Ulcerative colitis	CD226	CD226 Molecule	Protein Coding	48	GC18M069831	1.92261	https://www.genecards.org/cgi-bin/carddisp.pl?gene=CD226
Ulcerative colitis	CEP250	Centrosomal Protein 250	Protein Coding	46	GC20P035455	1.92261	https://www.genecards.org/cgi-bin/carddisp.pl?gene=CEP250
Ulcerative colitis	MIR124-3	MicroRNA 124-3	RNA Gene	20	GC20P063483	1.92233	https://www.genecards.org/cgi-bin/carddisp.pl?gene=MIR124-3
Ulcerative colitis	CCL22	C-C Motif Chemokine Ligand 22	Protein Coding	44	GC16P057359	1.92213	https://www.genecards.org/cgi-bin/carddisp.pl?gene=CCL22
Ulcerative colitis	FLVCR1	FLVCR Heme Transporter 1	Protein Coding	48	GC01P212858	1.92212	https://www.genecards.org/cgi-bin/carddisp.pl?gene=FLVCR1
Ulcerative colitis	DDB2	Damage Specific DNA Binding Protein 2	Protein Coding	53	GC11P047237	1.91996	https://www.genecards.org/cgi-bin/carddisp.pl?gene=DDB2
Ulcerative colitis	MIR92A1	MicroRNA 92a-1	RNA Gene	22	GC13P091582	1.91921	https://www.genecards.org/cgi-bin/carddisp.pl?gene=MIR92A1
Ulcerative colitis	TOP1	DNA Topoisomerase I	Protein Coding	55	GC20P041028	1.91821	https://www.genecards.org/cgi-bin/carddisp.pl?gene=TOP1
Ulcerative colitis	BECN1	Beclin 1	Protein Coding	52	GC17M042810	1.91738	https://www.genecards.org/cgi-bin/carddisp.pl?gene=BECN1
Ulcerative colitis	HOXB6	Homeobox B6	Protein Coding	43	GC17M052145	1.91711	https://www.genecards.org/cgi-bin/carddisp.pl?gene=HOXB6
Ulcerative colitis	RAB7B	RAB7B, Member RAS Oncogene Family	Protein Coding	36	GC01M205976	1.91583	https://www.genecards.org/cgi-bin/carddisp.pl?gene=RAB7B
Ulcerative colitis	BCAM	Basal Cell Adhesion Molecule (Lutheran Blood Group)	Protein Coding	47	GC19P073052	1.91533	https://www.genecards.org/cgi-bin/carddisp.pl?gene=BCAM
Ulcerative colitis	CTPS1	CTP Synthase 1	Protein Coding	54	GC01P040979	1.9086	https://www.genecards.org/cgi-bin/carddisp.pl?gene=CTPS1
Ulcerative colitis	ABCB11	ATP Binding Cassette Subfamily B Member 11	Protein Coding	53	GC02M168922	1.9086	https://www.genecards.org/cgi-bin/carddisp.pl?gene=ABCB11
Ulcerative colitis	EPHX2	Epoxide Hydrolase 2	Protein Coding	53	GC08P027490	1.90802	https://www.genecards.org/cgi-bin/carddisp.pl?gene=EPHX2
Ulcerative colitis	IL17RD	Interleukin 17 Receptor D	Protein Coding	52	GC03M057089	1.90802	https://www.genecards.org/cgi-bin/carddisp.pl?gene=IL17RD
Ulcerative colitis	CYP2J2	Cytochrome P450 Family 2 Subfamily J Member 2	Protein Coding	50	GC01M059893	1.90802	https://www.genecards.org/cgi-bin/carddisp.pl?gene=CYP2J2
Ulcerative colitis	RGS16	Regulator Of G Protein Signaling 16	Protein Coding	46	GC01M182598	1.90802	https://www.genecards.org/cgi-bin/carddisp.pl?gene=RGS16
Ulcerative colitis	ENPP7	Ectonucleotide Pyrophosphatase/Phosphodiesterase 7	Protein Coding	44	GC17P079730	1.90581	https://www.genecards.org/cgi-bin/carddisp.pl?gene=ENPP7
Ulcerative colitis	FURIN	Furin, Paired Basic Amino Acid Cleaving Enzyme	Protein Coding	54	GC15P090868	1.90457	https://www.genecards.org/cgi-bin/carddisp.pl?gene=FURIN
Ulcerative colitis	KCNQ1OT1	KCNQ1 Opposite Strand/Antisense Transcript 1	RNA Gene	30	GC11M004526	1.90333	https://www.genecards.org/cgi-bin/carddisp.pl?gene=KCNQ1OT1
Ulcerative colitis	HOXA11-AS	HOXA11 Antisense RNA	RNA Gene	24	GC07P027184	1.90333	https://www.genecards.org/cgi-bin/carddisp.pl?gene=HOXA11-AS
Ulcerative colitis	ZEB1-AS1	ZEB1 Antisense RNA 1	RNA Gene	21	GC10M031166	1.90333	https://www.genecards.org/cgi-bin/carddisp.pl?gene=ZEB1-AS1
Ulcerative colitis	CLK2	CDC Like Kinase 2	Protein Coding	48	GC01M155262	1.90092	https://www.genecards.org/cgi-bin/carddisp.pl?gene=CLK2
Ulcerative colitis	CISD1	CDGSH Iron Sulfur Domain 1	Protein Coding	44	GC10P058269	1.9009	https://www.genecards.org/cgi-bin/carddisp.pl?gene=CISD1
Ulcerative colitis	PRODH	Proline Dehydrogenase 1	Protein Coding	52	GC22M018912	1.89618	https://www.genecards.org/cgi-bin/carddisp.pl?gene=PRODH
Ulcerative colitis	BLVRB	Biliverdin Reductase B	Protein Coding	46	GC19M040447	1.89298	https://www.genecards.org/cgi-bin/carddisp.pl?gene=BLVRB
Ulcerative colitis	ACADVL	Acyl-CoA Dehydrogenase Very Long Chain	Protein Coding	51	GC17P007219	1.89296	https://www.genecards.org/cgi-bin/carddisp.pl?gene=ACADVL
Ulcerative colitis	PDGFA	Platelet Derived Growth Factor Subunit A	Protein Coding	50	GC07M000497	1.89125	https://www.genecards.org/cgi-bin/carddisp.pl?gene=PDGFA
Ulcerative colitis	IGLL5	Immunoglobulin Lambda Like Polypeptide 5	Protein Coding	36	GC22P044564	1.88668	https://www.genecards.org/cgi-bin/carddisp.pl?gene=IGLL5
Ulcerative colitis	ELF3	E74 Like ETS Transcription Factor 3	Protein Coding	45	GC01P202007	1.88502	https://www.genecards.org/cgi-bin/carddisp.pl?gene=ELF3
Ulcerative colitis	MAPK9	Mitogen-Activated Protein Kinase 9	Protein Coding	56	GC05M180263	1.88372	https://www.genecards.org/cgi-bin/carddisp.pl?gene=MAPK9
Ulcerative colitis	MIR324	MicroRNA 324	RNA Gene	23	GC17M007223	1.88054	https://www.genecards.org/cgi-bin/carddisp.pl?gene=MIR324
Ulcerative colitis	MIR23B	MicroRNA 23b	RNA Gene	22	GC09P095085	1.88054	https://www.genecards.org/cgi-bin/carddisp.pl?gene=MIR23B
Ulcerative colitis	MIR330	MicroRNA 330	RNA Gene	22	GC19M070743	1.88054	https://www.genecards.org/cgi-bin/carddisp.pl?gene=MIR330
Ulcerative colitis	CALB2	Calbindin 2	Protein Coding	46	GC16P071358	1.87765	https://www.genecards.org/cgi-bin/carddisp.pl?gene=CALB2
Ulcerative colitis	ATG3	Autophagy Related 3	Protein Coding	47	GC03M112532	1.8776	https://www.genecards.org/cgi-bin/carddisp.pl?gene=ATG3
Ulcerative colitis	THPO	Thrombopoietin	Protein Coding	50	GC03M184371	1.87528	https://www.genecards.org/cgi-bin/carddisp.pl?gene=THPO
Ulcerative colitis	CASP14	Caspase 14	Protein Coding	53	GC19P015049	1.87219	https://www.genecards.org/cgi-bin/carddisp.pl?gene=CASP14
Ulcerative colitis	ATF3	Activating Transcription Factor 3	Protein Coding	51	GC01P212565	1.87198	https://www.genecards.org/cgi-bin/carddisp.pl?gene=ATF3
Ulcerative colitis	XRCC6	X-Ray Repair Cross Complementing 6	Protein Coding	52	GC22P045321	1.86857	https://www.genecards.org/cgi-bin/carddisp.pl?gene=XRCC6
Ulcerative colitis	FLII	FLII Actin Remodeling Protein	Protein Coding	50	GC17M018244	1.86785	https://www.genecards.org/cgi-bin/carddisp.pl?gene=FLII
Ulcerative colitis	HSD17B10	Hydroxysteroid 17-Beta Dehydrogenase 10	Protein Coding	53	GC0XM053431	1.86481	https://www.genecards.org/cgi-bin/carddisp.pl?gene=HSD17B10
Ulcerative colitis	C1GALT1	Core 1 Synthase, Glycoprotein-N-Acetylgalactosamine 3-Beta-Galactosyltransferase 1	Protein Coding	47	GC07P007156	1.86296	https://www.genecards.org/cgi-bin/carddisp.pl?gene=C1GALT1
Ulcerative colitis	C2	Complement C2	Protein Coding	53	GC06P031897	1.86261	https://www.genecards.org/cgi-bin/carddisp.pl?gene=C2
Ulcerative colitis	SLC2A1	Solute Carrier Family 2 Member 1	Protein Coding	60	GC01M042925	1.86231	https://www.genecards.org/cgi-bin/carddisp.pl?gene=SLC2A1
Ulcerative colitis	CDK1	Cyclin Dependent Kinase 1	Protein Coding	54	GC10P060772	1.86222	https://www.genecards.org/cgi-bin/carddisp.pl?gene=CDK1
Ulcerative colitis	CAV3	Caveolin 3	Protein Coding	50	GC03P008733	1.86184	https://www.genecards.org/cgi-bin/carddisp.pl?gene=CAV3
Ulcerative colitis	HRH1	Histamine Receptor H1	Protein Coding	52	GC03P013698	1.86096	https://www.genecards.org/cgi-bin/carddisp.pl?gene=HRH1
Ulcerative colitis	PTGDS	Prostaglandin D2 Synthase	Protein Coding	52	GC09P137169	1.86009	https://www.genecards.org/cgi-bin/carddisp.pl?gene=PTGDS
Ulcerative colitis	AKAP12	A-Kinase Anchoring Protein 12	Protein Coding	48	GC06P151239	1.85934	https://www.genecards.org/cgi-bin/carddisp.pl?gene=AKAP12
Ulcerative colitis	RAG1	Recombination Activating 1	Protein Coding	52	GC11P036542	1.85855	https://www.genecards.org/cgi-bin/carddisp.pl?gene=RAG1
Ulcerative colitis	TNC	Tenascin C	Protein Coding	56	GC09M115019	1.85312	https://www.genecards.org/cgi-bin/carddisp.pl?gene=TNC
Ulcerative colitis	MIR598	MicroRNA 598	RNA Gene	19	GC08M011035	1.85117	https://www.genecards.org/cgi-bin/carddisp.pl?gene=MIR598
Ulcerative colitis	FHL2	Four And A Half LIM Domains 2	Protein Coding	53	GC02M105357	1.84954	https://www.genecards.org/cgi-bin/carddisp.pl?gene=FHL2
Ulcerative colitis	MTMR2	Myotubularin Related Protein 2	Protein Coding	52	GC11M100315	1.84585	https://www.genecards.org/cgi-bin/carddisp.pl?gene=MTMR2
Ulcerative colitis	SPINT1	Serine Peptidase Inhibitor, Kunitz Type 1	Protein Coding	48	GC15P040844	1.84285	https://www.genecards.org/cgi-bin/carddisp.pl?gene=SPINT1
Ulcerative colitis	AMBP	Alpha-1-Microglobulin/Bikunin Precursor	Protein Coding	50	GC09M114060	1.84157	https://www.genecards.org/cgi-bin/carddisp.pl?gene=AMBP
Ulcerative colitis	CDH2	Cadherin 2	Protein Coding	59	GC18M028088	1.84107	https://www.genecards.org/cgi-bin/carddisp.pl?gene=CDH2
Ulcerative colitis	TLR10	Toll Like Receptor 10	Protein Coding	46	GC04M038773	1.84107	https://www.genecards.org/cgi-bin/carddisp.pl?gene=TLR10
Ulcerative colitis	GLI2	GLI Family Zinc Finger 2	Protein Coding	56	GC02P120735	1.84093	https://www.genecards.org/cgi-bin/carddisp.pl?gene=GLI2
Ulcerative colitis	SCNN1B	Sodium Channel Epithelial 1 Subunit Beta	Protein Coding	55	GC16P023278	1.84089	https://www.genecards.org/cgi-bin/carddisp.pl?gene=SCNN1B
Ulcerative colitis	HMGA1	High Mobility Group AT-Hook 1	Protein Coding	53	GC06P092259	1.84089	https://www.genecards.org/cgi-bin/carddisp.pl?gene=HMGA1
Ulcerative colitis	SCNN1G	Sodium Channel Epithelial 1 Subunit Gamma	Protein Coding	53	GC16P023182	1.84089	https://www.genecards.org/cgi-bin/carddisp.pl?gene=SCNN1G
Ulcerative colitis	PPP5C	Protein Phosphatase 5 Catalytic Subunit	Protein Coding	52	GC19P073092	1.83613	https://www.genecards.org/cgi-bin/carddisp.pl?gene=PPP5C
Ulcerative colitis	MSTO1	Misato Mitochondrial Distribution And Morphology Regulator 1	Protein Coding	46	GC01P155565	1.83613	https://www.genecards.org/cgi-bin/carddisp.pl?gene=MSTO1
Ulcerative colitis	TRIB1	Tribbles Pseudokinase 1	Protein Coding	46	GC08P125430	1.83613	https://www.genecards.org/cgi-bin/carddisp.pl?gene=TRIB1
Ulcerative colitis	ZPBP	Zona Pellucida Binding Protein	Protein Coding	46	GC07M049850	1.83613	https://www.genecards.org/cgi-bin/carddisp.pl?gene=ZPBP
Ulcerative colitis	TSPAN33	Tetraspanin 33	Protein Coding	44	GC07P132490	1.83613	https://www.genecards.org/cgi-bin/carddisp.pl?gene=TSPAN33
Ulcerative colitis	SLC7A5	Solute Carrier Family 7 Member 5	Protein Coding	51	GC16M087830	1.83546	https://www.genecards.org/cgi-bin/carddisp.pl?gene=SLC7A5
Ulcerative colitis	TKT	Transketolase	Protein Coding	52	GC03M053224	1.83393	https://www.genecards.org/cgi-bin/carddisp.pl?gene=TKT
Ulcerative colitis	GPR18	G Protein-Coupled Receptor 18	Protein Coding	46	GC13M099254	1.83189	https://www.genecards.org/cgi-bin/carddisp.pl?gene=GPR18
Ulcerative colitis	WNT1	Wnt Family Member 1	Protein Coding	52	GC12P049566	1.83127	https://www.genecards.org/cgi-bin/carddisp.pl?gene=WNT1
Ulcerative colitis	NR0B2	Nuclear Receptor Subfamily 0 Group B Member 2	Protein Coding	50	GC01M027236	1.82925	https://www.genecards.org/cgi-bin/carddisp.pl?gene=NR0B2
Ulcerative colitis	MIR433	MicroRNA 433	RNA Gene	25	GC14P110566	1.82718	https://www.genecards.org/cgi-bin/carddisp.pl?gene=MIR433
Ulcerative colitis	MIRLET7E	MicroRNA Let-7e	RNA Gene	22	GC19P073356	1.82455	https://www.genecards.org/cgi-bin/carddisp.pl?gene=MIRLET7E
Ulcerative colitis	MIR574	MicroRNA 574	RNA Gene	23	GC04P038983	1.82125	https://www.genecards.org/cgi-bin/carddisp.pl?gene=MIR574
Ulcerative colitis	MIR675	MicroRNA 675	RNA Gene	22	GC11M004503	1.82125	https://www.genecards.org/cgi-bin/carddisp.pl?gene=MIR675
Ulcerative colitis	MIR490	MicroRNA 490	RNA Gene	19	GC07P136903	1.82125	https://www.genecards.org/cgi-bin/carddisp.pl?gene=MIR490
Ulcerative colitis	IL36RN	Interleukin 36 Receptor Antagonist	Protein Coding	50	GC02P123801	1.82016	https://www.genecards.org/cgi-bin/carddisp.pl?gene=IL36RN
Ulcerative colitis	CD5	CD5 Molecule	Protein Coding	49	GC11P061118	1.82013	https://www.genecards.org/cgi-bin/carddisp.pl?gene=CD5
Ulcerative colitis	LYZ	Lysozyme	Protein Coding	53	GC12P069348	1.81925	https://www.genecards.org/cgi-bin/carddisp.pl?gene=LYZ
Ulcerative colitis	RAD50	RAD50 Double Strand Break Repair Protein	Protein Coding	56	GC05P132556	1.81504	https://www.genecards.org/cgi-bin/carddisp.pl?gene=RAD50
Ulcerative colitis	TCF3	Transcription Factor 3	Protein Coding	52	GC19M001609	1.81504	https://www.genecards.org/cgi-bin/carddisp.pl?gene=TCF3
Ulcerative colitis	MAP2K5	Mitogen-Activated Protein Kinase Kinase 5	Protein Coding	51	GC15P123397	1.81504	https://www.genecards.org/cgi-bin/carddisp.pl?gene=MAP2K5
Ulcerative colitis	NUDT1	Nudix Hydrolase 1	Protein Coding	48	GC07P002242	1.81504	https://www.genecards.org/cgi-bin/carddisp.pl?gene=NUDT1
Ulcerative colitis	CDK5RAP1	CDK5 Regulatory Subunit Associated Protein 1	Protein Coding	44	GC20M033358	1.81504	https://www.genecards.org/cgi-bin/carddisp.pl?gene=CDK5RAP1
Ulcerative colitis	NKD1	NKD Inhibitor Of WNT Signaling Pathway 1	Protein Coding	42	GC16P050548	1.81504	https://www.genecards.org/cgi-bin/carddisp.pl?gene=NKD1
Ulcerative colitis	HOTAIRM1	HOXA Transcript Antisense RNA, Myeloid-Specific 1	RNA Gene	22	GC07P027095	1.81504	https://www.genecards.org/cgi-bin/carddisp.pl?gene=HOTAIRM1
Ulcerative colitis	SCARNA5	Small Cajal Body-Specific RNA 5	RNA Gene	22	GC02P233275	1.81504	https://www.genecards.org/cgi-bin/carddisp.pl?gene=SCARNA5
Ulcerative colitis	LINC00460	Long Intergenic Non-Protein Coding RNA 460	RNA Gene	19	GC13P106376	1.81504	https://www.genecards.org/cgi-bin/carddisp.pl?gene=LINC00460
Ulcerative colitis	MIR422A	MicroRNA 422a	RNA Gene	19	GC15M063870	1.81504	https://www.genecards.org/cgi-bin/carddisp.pl?gene=MIR422A
Ulcerative colitis	TBXAS1	Thromboxane A Synthase 1	Protein Coding	56	GC07P139777	1.81279	https://www.genecards.org/cgi-bin/carddisp.pl?gene=TBXAS1
Ulcerative colitis	DVL2	Dishevelled Segment Polarity Protein 2	Protein Coding	51	GC17M007225	1.81184	https://www.genecards.org/cgi-bin/carddisp.pl?gene=DVL2
Ulcerative colitis	FOXE1	Forkhead Box E1	Protein Coding	48	GC09P097853	1.80737	https://www.genecards.org/cgi-bin/carddisp.pl?gene=FOXE1
Ulcerative colitis	CYSLTR1	Cysteinyl Leukotriene Receptor 1	Protein Coding	50	GC0XM078271	1.8047	https://www.genecards.org/cgi-bin/carddisp.pl?gene=CYSLTR1
Ulcerative colitis	NCAPD3	Non-SMC Condensin II Complex Subunit D3	Protein Coding	47	GC11M134150	1.80433	https://www.genecards.org/cgi-bin/carddisp.pl?gene=NCAPD3
Ulcerative colitis	BCL2L12	BCL2 Like 12	Protein Coding	46	GC19P049665	1.80433	https://www.genecards.org/cgi-bin/carddisp.pl?gene=BCL2L12
Ulcerative colitis	LPIN2	Lipin 2	Protein Coding	49	GC18M003299	1.80201	https://www.genecards.org/cgi-bin/carddisp.pl?gene=LPIN2
Ulcerative colitis	POU2F1	POU Class 2 Homeobox 1	Protein Coding	50	GC01P167190	1.79971	https://www.genecards.org/cgi-bin/carddisp.pl?gene=POU2F1
Ulcerative colitis	SYNE1	Spectrin Repeat Containing Nuclear Envelope Protein 1	Protein Coding	47	GC06M152121	1.79829	https://www.genecards.org/cgi-bin/carddisp.pl?gene=SYNE1
Ulcerative colitis	MMP15	Matrix Metallopeptidase 15	Protein Coding	51	GC16P058025	1.79681	https://www.genecards.org/cgi-bin/carddisp.pl?gene=MMP15
Ulcerative colitis	LGALS2	Galectin 2	Protein Coding	46	GC22M037570	1.7964	https://www.genecards.org/cgi-bin/carddisp.pl?gene=LGALS2
Ulcerative colitis	BLOC1S6	Biogenesis Of Lysosomal Organelles Complex 1 Subunit 6	Protein Coding	46	GC15P046643	1.7955	https://www.genecards.org/cgi-bin/carddisp.pl?gene=BLOC1S6
Ulcerative colitis	ARFRP1	ADP Ribosylation Factor Related Protein 1	Protein Coding	43	GC20M063698	1.79369	https://www.genecards.org/cgi-bin/carddisp.pl?gene=ARFRP1
Ulcerative colitis	NCKIPSD	NCK Interacting Protein With SH3 Domain	Protein Coding	43	GC03M048667	1.79369	https://www.genecards.org/cgi-bin/carddisp.pl?gene=NCKIPSD
Ulcerative colitis	STC1	Stanniocalcin 1	Protein Coding	48	GC08M023841	1.79183	https://www.genecards.org/cgi-bin/carddisp.pl?gene=STC1
Ulcerative colitis	MLNR	Motilin Receptor	Protein Coding	47	GC13P049220	1.79088	https://www.genecards.org/cgi-bin/carddisp.pl?gene=MLNR
Ulcerative colitis	IL22RA2	Interleukin 22 Receptor Subunit Alpha 2	Protein Coding	47	GC06M137143	1.78361	https://www.genecards.org/cgi-bin/carddisp.pl?gene=IL22RA2
Ulcerative colitis	AR	Androgen Receptor	Protein Coding	59	GC0XP067544	1.78319	https://www.genecards.org/cgi-bin/carddisp.pl?gene=AR
Ulcerative colitis	HEY2	Hes Related Family BHLH Transcription Factor With YRPW Motif 2	Protein Coding	46	GC06P125730	1.78307	https://www.genecards.org/cgi-bin/carddisp.pl?gene=HEY2
Ulcerative colitis	KRT17	Keratin 17	Protein Coding	51	GC17M041619	1.78002	https://www.genecards.org/cgi-bin/carddisp.pl?gene=KRT17
Ulcerative colitis	KEAP1	Kelch Like ECH Associated Protein 1	Protein Coding	56	GC19M010486	1.77654	https://www.genecards.org/cgi-bin/carddisp.pl?gene=KEAP1
Ulcerative colitis	MRAP	Melanocortin 2 Receptor Accessory Protein	Protein Coding	42	GC21P032291	1.7759	https://www.genecards.org/cgi-bin/carddisp.pl?gene=MRAP
Ulcerative colitis	UBC	Ubiquitin C	Protein Coding	49	GC12M124911	1.77223	https://www.genecards.org/cgi-bin/carddisp.pl?gene=UBC
Ulcerative colitis	RAF1	Raf-1 Proto-Oncogene, Serine/Threonine Kinase	Protein Coding	61	GC03M012583	1.77018	https://www.genecards.org/cgi-bin/carddisp.pl?gene=RAF1
Ulcerative colitis	SULT2A1	Sulfotransferase Family 2A Member 1	Protein Coding	50	GC19M047870	1.76984	https://www.genecards.org/cgi-bin/carddisp.pl?gene=SULT2A1
Ulcerative colitis	WASF2	WASP Family Member 2	Protein Coding	50	GC01M027404	1.76913	https://www.genecards.org/cgi-bin/carddisp.pl?gene=WASF2
Ulcerative colitis	ZNF148	Zinc Finger Protein 148	Protein Coding	48	GC03M125225	1.76709	https://www.genecards.org/cgi-bin/carddisp.pl?gene=ZNF148
Ulcerative colitis	FOSL2	FOS Like 2, AP-1 Transcription Factor Subunit	Protein Coding	48	GC02P028392	1.76145	https://www.genecards.org/cgi-bin/carddisp.pl?gene=FOSL2
Ulcerative colitis	TAGAP	T Cell Activation RhoGTPase Activating Protein	Protein Coding	44	GC06M159034	1.76145	https://www.genecards.org/cgi-bin/carddisp.pl?gene=TAGAP
Ulcerative colitis	TNFSF18	TNF Superfamily Member 18	Protein Coding	44	GC01M173009	1.76145	https://www.genecards.org/cgi-bin/carddisp.pl?gene=TNFSF18
Ulcerative colitis	VNN1	Vanin 1	Protein Coding	51	GC06M132680	1.75927	https://www.genecards.org/cgi-bin/carddisp.pl?gene=VNN1
Ulcerative colitis	ZBTB7B	Zinc Finger And BTB Domain Containing 7B	Protein Coding	46	GC01P155044	1.75617	https://www.genecards.org/cgi-bin/carddisp.pl?gene=ZBTB7B
Ulcerative colitis	MIR183	MicroRNA 183	RNA Gene	22	GC07M129844	1.75567	https://www.genecards.org/cgi-bin/carddisp.pl?gene=MIR183
Ulcerative colitis	MIR328	MicroRNA 328	RNA Gene	22	GC16M067203	1.75567	https://www.genecards.org/cgi-bin/carddisp.pl?gene=MIR328
Ulcerative colitis	MIR28	MicroRNA 28	RNA Gene	21	GC03P188688	1.75567	https://www.genecards.org/cgi-bin/carddisp.pl?gene=MIR28
Ulcerative colitis	SUZ12	SUZ12 Polycomb Repressive Complex 2 Subunit	Protein Coding	48	GC17P031937	1.75455	https://www.genecards.org/cgi-bin/carddisp.pl?gene=SUZ12
Ulcerative colitis	SEPSECS	Sep (O-Phosphoserine) TRNA:Sec (Selenocysteine) TRNA Synthase	Protein Coding	51	GC04M025121	1.7532	https://www.genecards.org/cgi-bin/carddisp.pl?gene=SEPSECS
Ulcerative colitis	MEP1A	Meprin A Subunit Alpha	Protein Coding	48	GC06P046793	1.75146	https://www.genecards.org/cgi-bin/carddisp.pl?gene=MEP1A
Ulcerative colitis	PEBP1	Phosphatidylethanolamine Binding Protein 1	Protein Coding	53	GC12P118135	1.75075	https://www.genecards.org/cgi-bin/carddisp.pl?gene=PEBP1
Ulcerative colitis	CAMK2G	Calcium/Calmodulin Dependent Protein Kinase II Gamma	Protein Coding	54	GC10M073812	1.75027	https://www.genecards.org/cgi-bin/carddisp.pl?gene=CAMK2G
Ulcerative colitis	IL25	Interleukin 25	Protein Coding	46	GC14P034672	1.74801	https://www.genecards.org/cgi-bin/carddisp.pl?gene=IL25
Ulcerative colitis	IL36A	Interleukin 36 Alpha	Protein Coding	44	GC02P113005	1.74726	https://www.genecards.org/cgi-bin/carddisp.pl?gene=IL36A
Ulcerative colitis	PRKAR1A	Protein Kinase CAMP-Dependent Type I Regulatory Subunit Alpha	Protein Coding	57	GC17P069214	1.74707	https://www.genecards.org/cgi-bin/carddisp.pl?gene=PRKAR1A
Ulcerative colitis	RARG	Retinoic Acid Receptor Gamma	Protein Coding	54	GC12M053210	1.74553	https://www.genecards.org/cgi-bin/carddisp.pl?gene=RARG
Ulcerative colitis	GABPA	GA Binding Protein Transcription Factor Subunit Alpha	Protein Coding	46	GC21P025734	1.74553	https://www.genecards.org/cgi-bin/carddisp.pl?gene=GABPA
Ulcerative colitis	IL36B	Interleukin 36 Beta	Protein Coding	42	GC02M113022	1.74553	https://www.genecards.org/cgi-bin/carddisp.pl?gene=IL36B
Ulcerative colitis	RPL35P3	Ribosomal Protein L35 Pseudogene 3	Pseudogene	9	GC06M105302	1.74553	https://www.genecards.org/cgi-bin/carddisp.pl?gene=RPL35P3
Ulcerative colitis	RHO	Rhodopsin	Protein Coding	55	GC03P134990	1.7449	https://www.genecards.org/cgi-bin/carddisp.pl?gene=RHO
Ulcerative colitis	CD48	CD48 Molecule	Protein Coding	47	GC01M160648	1.74311	https://www.genecards.org/cgi-bin/carddisp.pl?gene=CD48
Ulcerative colitis	XRCC3	X-Ray Repair Cross Complementing 3	Protein Coding	50	GC14M103697	1.74298	https://www.genecards.org/cgi-bin/carddisp.pl?gene=XRCC3
Ulcerative colitis	IRAK3	Interleukin 1 Receptor Associated Kinase 3	Protein Coding	53	GC12P066318	1.74154	https://www.genecards.org/cgi-bin/carddisp.pl?gene=IRAK3
Ulcerative colitis	OGA	O-GlcNAcase	Protein Coding	47	GC10M101785	1.73872	https://www.genecards.org/cgi-bin/carddisp.pl?gene=OGA
Ulcerative colitis	ALPI	Alkaline Phosphatase, Intestinal	Protein Coding	53	GC02P232456	1.73769	https://www.genecards.org/cgi-bin/carddisp.pl?gene=ALPI
Ulcerative colitis	COL5A2	Collagen Type V Alpha 2 Chain	Protein Coding	51	GC02M189031	1.73638	https://www.genecards.org/cgi-bin/carddisp.pl?gene=COL5A2
Ulcerative colitis	TNFAIP6	TNF Alpha Induced Protein 6	Protein Coding	47	GC02P151357	1.73344	https://www.genecards.org/cgi-bin/carddisp.pl?gene=TNFAIP6
Ulcerative colitis	OPLAH	5-Oxoprolinase, ATP-Hydrolysing	Protein Coding	50	GC08M144278	1.73312	https://www.genecards.org/cgi-bin/carddisp.pl?gene=OPLAH
Ulcerative colitis	JUP	Junction Plakoglobin	Protein Coding	55	GC17M041754	1.73072	https://www.genecards.org/cgi-bin/carddisp.pl?gene=JUP
Ulcerative colitis	NKX2-1	NK2 Homeobox 1	Protein Coding	53	GC14M036516	1.73034	https://www.genecards.org/cgi-bin/carddisp.pl?gene=NKX2-1
Ulcerative colitis	ADORA2B	Adenosine A2b Receptor	Protein Coding	55	GC17P017963	1.72944	https://www.genecards.org/cgi-bin/carddisp.pl?gene=ADORA2B
Ulcerative colitis	HMGCR	3-Hydroxy-3-Methylglutaryl-CoA Reductase	Protein Coding	53	GC05P075336	1.72771	https://www.genecards.org/cgi-bin/carddisp.pl?gene=HMGCR
Ulcerative colitis	MYLK3	Myosin Light Chain Kinase 3	Protein Coding	49	GC16M047059	1.72665	https://www.genecards.org/cgi-bin/carddisp.pl?gene=MYLK3
Ulcerative colitis	PF4	Platelet Factor 4	Protein Coding	47	GC04M073980	1.72644	https://www.genecards.org/cgi-bin/carddisp.pl?gene=PF4
Ulcerative colitis	ATG7	Autophagy Related 7	Protein Coding	50	GC03P013699	1.72619	https://www.genecards.org/cgi-bin/carddisp.pl?gene=ATG7
Ulcerative colitis	PLCG1	Phospholipase C Gamma 1	Protein Coding	53	GC20P041136	1.72381	https://www.genecards.org/cgi-bin/carddisp.pl?gene=PLCG1
Ulcerative colitis	MUC20	Mucin 20, Cell Surface Associated	Protein Coding	45	GC03P195720	1.72308	https://www.genecards.org/cgi-bin/carddisp.pl?gene=MUC20
Ulcerative colitis	RARB	Retinoic Acid Receptor Beta	Protein Coding	56	GC03P024689	1.71721	https://www.genecards.org/cgi-bin/carddisp.pl?gene=RARB
Ulcerative colitis	MIR193B	MicroRNA 193b	RNA Gene	24	GC16P014315	1.7147	https://www.genecards.org/cgi-bin/carddisp.pl?gene=MIR193B
Ulcerative colitis	CXCL13	C-X-C Motif Chemokine Ligand 13	Protein Coding	47	GC04P077511	1.71372	https://www.genecards.org/cgi-bin/carddisp.pl?gene=CXCL13
Ulcerative colitis	IKBKE	Inhibitor Of Nuclear Factor Kappa B Kinase Subunit Epsilon	Protein Coding	52	GC01P206470	1.7096	https://www.genecards.org/cgi-bin/carddisp.pl?gene=IKBKE
Ulcerative colitis	SETD1A	SET Domain Containing 1A, Histone Lysine Methyltransferase	Protein Coding	49	GC16P042827	1.7096	https://www.genecards.org/cgi-bin/carddisp.pl?gene=SETD1A
Ulcerative colitis	MUS81	MUS81 Structure-Specific Endonuclease Subunit	Protein Coding	48	GC11P070895	1.7096	https://www.genecards.org/cgi-bin/carddisp.pl?gene=MUS81
Ulcerative colitis	POLA2	DNA Polymerase Alpha 2, Accessory Subunit	Protein Coding	47	GC11P070854	1.7096	https://www.genecards.org/cgi-bin/carddisp.pl?gene=POLA2
Ulcerative colitis	USP19	Ubiquitin Specific Peptidase 19	Protein Coding	45	GC03M051550	1.7096	https://www.genecards.org/cgi-bin/carddisp.pl?gene=USP19
Ulcerative colitis	ATG2A	Autophagy Related 2A	Protein Coding	44	GC11M099669	1.7096	https://www.genecards.org/cgi-bin/carddisp.pl?gene=ATG2A
Ulcerative colitis	NRBP1	Nuclear Receptor Binding Protein 1	Protein Coding	44	GC02P027427	1.7096	https://www.genecards.org/cgi-bin/carddisp.pl?gene=NRBP1
Ulcerative colitis	ST7	Suppression Of Tumorigenicity 7	Protein Coding	42	GC07P117096	1.7096	https://www.genecards.org/cgi-bin/carddisp.pl?gene=ST7
Ulcerative colitis	FLNC	Filamin C	Protein Coding	52	GC07P128830	1.7087	https://www.genecards.org/cgi-bin/carddisp.pl?gene=FLNC
Ulcerative colitis	HLA-F-AS1	HLA-F Antisense RNA 1	RNA Gene	21	GC06M071604	1.7087	https://www.genecards.org/cgi-bin/carddisp.pl?gene=HLA-F-AS1
Ulcerative colitis	MACF1	Microtubule Actin Crosslinking Factor 1	Protein Coding	48	GC01P039082	1.70767	https://www.genecards.org/cgi-bin/carddisp.pl?gene=MACF1
Ulcerative colitis	INTS11	Integrator Complex Subunit 11	Protein Coding	43	GC01M007463	1.70716	https://www.genecards.org/cgi-bin/carddisp.pl?gene=INTS11
Ulcerative colitis	ANKRD55	Ankyrin Repeat Domain 55	Protein Coding	39	GC05M056099	1.70716	https://www.genecards.org/cgi-bin/carddisp.pl?gene=ANKRD55
Ulcerative colitis	ADORA3	Adenosine A3 Receptor	Protein Coding	52	GC01M111499	1.70669	https://www.genecards.org/cgi-bin/carddisp.pl?gene=ADORA3
Ulcerative colitis	CCL28	C-C Motif Chemokine Ligand 28	Protein Coding	47	GC05M043356	1.70651	https://www.genecards.org/cgi-bin/carddisp.pl?gene=CCL28
Ulcerative colitis	IRF4	Interferon Regulatory Factor 4	Protein Coding	50	GC06P000391	1.70384	https://www.genecards.org/cgi-bin/carddisp.pl?gene=IRF4
Ulcerative colitis	GALC	Galactosylceramidase	Protein Coding	51	GC14M087837	1.7022	https://www.genecards.org/cgi-bin/carddisp.pl?gene=GALC
Ulcerative colitis	CTSW	Cathepsin W	Protein Coding	43	GC11P065879	1.7022	https://www.genecards.org/cgi-bin/carddisp.pl?gene=CTSW
Ulcerative colitis	SFRP1	Secreted Frizzled Related Protein 1	Protein Coding	51	GC08M041262	1.6999	https://www.genecards.org/cgi-bin/carddisp.pl?gene=SFRP1
Ulcerative colitis	FAAH	Fatty Acid Amide Hydrolase	Protein Coding	54	GC01P046394	1.69886	https://www.genecards.org/cgi-bin/carddisp.pl?gene=FAAH
Ulcerative colitis	LACTB	Lactamase Beta	Protein Coding	43	GC15P124644	1.69415	https://www.genecards.org/cgi-bin/carddisp.pl?gene=LACTB
Ulcerative colitis	MMP19	Matrix Metallopeptidase 19	Protein Coding	55	GC12M055835	1.69317	https://www.genecards.org/cgi-bin/carddisp.pl?gene=MMP19
Ulcerative colitis	TPM1	Tropomyosin 1	Protein Coding	55	GC15P126449	1.69297	https://www.genecards.org/cgi-bin/carddisp.pl?gene=TPM1
Ulcerative colitis	FUT8	Fucosyltransferase 8	Protein Coding	51	GC14P065411	1.69297	https://www.genecards.org/cgi-bin/carddisp.pl?gene=FUT8
Ulcerative colitis	RPS2P34	Ribosomal Protein S2 Pseudogene 34	Pseudogene	10	GC09P082130	1.69297	https://www.genecards.org/cgi-bin/carddisp.pl?gene=RPS2P34
Ulcerative colitis	LOC442427	Putative UPF0607 Protein ENSP00000381418	Pseudogene	4	GC09M082431	1.69297	https://www.genecards.org/cgi-bin/carddisp.pl?gene=LOC442427
Ulcerative colitis	MLANA	Melan-A	Protein Coding	47	GC09P007673	1.6893	https://www.genecards.org/cgi-bin/carddisp.pl?gene=MLANA
Ulcerative colitis	CXCR5	C-X-C Motif Chemokine Receptor 5	Protein Coding	48	GC11P118928	1.6879	https://www.genecards.org/cgi-bin/carddisp.pl?gene=CXCR5
Ulcerative colitis	C1GALT1C1	C1GALT1 Specific Chaperone 1	Protein Coding	43	GC0XM120625	1.68616	https://www.genecards.org/cgi-bin/carddisp.pl?gene=C1GALT1C1
Ulcerative colitis	CEACAM7	CEA Cell Adhesion Molecule 7	Protein Coding	44	GC19M041673	1.6831	https://www.genecards.org/cgi-bin/carddisp.pl?gene=CEACAM7
Ulcerative colitis	DEFA1	Defensin Alpha 1	Protein Coding	44	GC08M006977	1.68261	https://www.genecards.org/cgi-bin/carddisp.pl?gene=DEFA1
Ulcerative colitis	SLAMF6	SLAM Family Member 6	Protein Coding	47	GC01M160454	1.68126	https://www.genecards.org/cgi-bin/carddisp.pl?gene=SLAMF6
Ulcerative colitis	MIRLET7I	MicroRNA Let-7i	RNA Gene	23	GC12P062616	1.68126	https://www.genecards.org/cgi-bin/carddisp.pl?gene=MIRLET7I
Ulcerative colitis	MIR181A1	MicroRNA 181a-1	RNA Gene	21	GC01M198860	1.68043	https://www.genecards.org/cgi-bin/carddisp.pl?gene=MIR181A1
Ulcerative colitis	CD207	CD207 Molecule	Protein Coding	46	GC02M070830	1.67857	https://www.genecards.org/cgi-bin/carddisp.pl?gene=CD207
Ulcerative colitis	CA1	Carbonic Anhydrase 1	Protein Coding	54	GC08M085327	1.67823	https://www.genecards.org/cgi-bin/carddisp.pl?gene=CA1
Ulcerative colitis	NTSR1	Neurotensin Receptor 1	Protein Coding	49	GC20P062708	1.67685	https://www.genecards.org/cgi-bin/carddisp.pl?gene=NTSR1
Ulcerative colitis	PIK3CB	Phosphatidylinositol-4,5-Bisphosphate 3-Kinase Catalytic Subunit Beta	Protein Coding	55	GC03M138652	1.67626	https://www.genecards.org/cgi-bin/carddisp.pl?gene=PIK3CB
Ulcerative colitis	KSR1	Kinase Suppressor Of Ras 1	Protein Coding	48	GC17P027456	1.67602	https://www.genecards.org/cgi-bin/carddisp.pl?gene=KSR1
Ulcerative colitis	CIDEB	Cell Death Inducing DFFA Like Effector B	Protein Coding	42	GC14M024305	1.67075	https://www.genecards.org/cgi-bin/carddisp.pl?gene=CIDEB
Ulcerative colitis	PSMA7	Proteasome 20S Subunit Alpha 7	Protein Coding	51	GC20M062136	1.67018	https://www.genecards.org/cgi-bin/carddisp.pl?gene=PSMA7
Ulcerative colitis	ILK	Integrin Linked Kinase	Protein Coding	52	GC11P006604	1.66913	https://www.genecards.org/cgi-bin/carddisp.pl?gene=ILK
Ulcerative colitis	LRRC56	Leucine Rich Repeat Containing 56	Protein Coding	41	GC11P000518	1.6679	https://www.genecards.org/cgi-bin/carddisp.pl?gene=LRRC56
Ulcerative colitis	MT-CYB	Mitochondrially Encoded Cytochrome B	Protein Coding	38	GCMTP014749	1.66635	https://www.genecards.org/cgi-bin/carddisp.pl?gene=MT-CYB
Ulcerative colitis	MCM2	Minichromosome Maintenance Complex Component 2	Protein Coding	53	GC03P127598	1.66564	https://www.genecards.org/cgi-bin/carddisp.pl?gene=MCM2
Ulcerative colitis	RBM14	RNA Binding Motif Protein 14	Protein Coding	45	GC11P070979	1.6639	https://www.genecards.org/cgi-bin/carddisp.pl?gene=RBM14
Ulcerative colitis	MIR27B	MicroRNA 27b	RNA Gene	23	GC09P095102	1.6637	https://www.genecards.org/cgi-bin/carddisp.pl?gene=MIR27B
Ulcerative colitis	SERPINB5	Serpin Family B Member 5	Protein Coding	49	GC18P063476	1.66236	https://www.genecards.org/cgi-bin/carddisp.pl?gene=SERPINB5
Ulcerative colitis	IL1RAP	Interleukin 1 Receptor Accessory Protein	Protein Coding	53	GC03P190514	1.66184	https://www.genecards.org/cgi-bin/carddisp.pl?gene=IL1RAP
Ulcerative colitis	HCRTR1	Hypocretin Receptor 1	Protein Coding	51	GC01P031587	1.66184	https://www.genecards.org/cgi-bin/carddisp.pl?gene=HCRTR1
Ulcerative colitis	TRAP1	TNF Receptor Associated Protein 1	Protein Coding	51	GC16M008256	1.66184	https://www.genecards.org/cgi-bin/carddisp.pl?gene=TRAP1
Ulcerative colitis	ALPP	Alkaline Phosphatase, Placental	Protein Coding	51	GC02P232378	1.66176	https://www.genecards.org/cgi-bin/carddisp.pl?gene=ALPP
Ulcerative colitis	BCHE	Butyrylcholinesterase	Protein Coding	57	GC03M165772	1.65692	https://www.genecards.org/cgi-bin/carddisp.pl?gene=BCHE
Ulcerative colitis	FZD8	Frizzled Class Receptor 8	Protein Coding	50	GC10M035638	1.64972	https://www.genecards.org/cgi-bin/carddisp.pl?gene=FZD8
Ulcerative colitis	MIR132	MicroRNA 132	RNA Gene	24	GC17M002049	1.64911	https://www.genecards.org/cgi-bin/carddisp.pl?gene=MIR132
Ulcerative colitis	SLC10A2	Solute Carrier Family 10 Member 2	Protein Coding	48	GC13M103043	1.6491	https://www.genecards.org/cgi-bin/carddisp.pl?gene=SLC10A2
Ulcerative colitis	BMP4	Bone Morphogenetic Protein 4	Protein Coding	55	GC14M053949	1.64603	https://www.genecards.org/cgi-bin/carddisp.pl?gene=BMP4
Ulcerative colitis	ANXA2	Annexin A2	Protein Coding	55	GC15M060347	1.64516	https://www.genecards.org/cgi-bin/carddisp.pl?gene=ANXA2
Ulcerative colitis	HDAC7	Histone Deacetylase 7	Protein Coding	53	GC12M047782	1.64482	https://www.genecards.org/cgi-bin/carddisp.pl?gene=HDAC7
Ulcerative colitis	RIT1	Ras Like Without CAAX 1	Protein Coding	53	GC01M155897	1.64482	https://www.genecards.org/cgi-bin/carddisp.pl?gene=RIT1
Ulcerative colitis	RPS6KA4	Ribosomal Protein S6 Kinase A4	Protein Coding	53	GC11P064477	1.64482	https://www.genecards.org/cgi-bin/carddisp.pl?gene=RPS6KA4
Ulcerative colitis	GPX4	Glutathione Peroxidase 4	Protein Coding	52	GC19P001103	1.64482	https://www.genecards.org/cgi-bin/carddisp.pl?gene=GPX4
Ulcerative colitis	LNPEP	Leucyl And Cystinyl Aminopeptidase	Protein Coding	52	GC05P096935	1.64482	https://www.genecards.org/cgi-bin/carddisp.pl?gene=LNPEP
Ulcerative colitis	FADS2	Fatty Acid Desaturase 2	Protein Coding	51	GC11P061792	1.64482	https://www.genecards.org/cgi-bin/carddisp.pl?gene=FADS2
Ulcerative colitis	SPRY4	Sprouty RTK Signaling Antagonist 4	Protein Coding	51	GC05M142310	1.64482	https://www.genecards.org/cgi-bin/carddisp.pl?gene=SPRY4
Ulcerative colitis	TNNI2	Troponin I2, Fast Skeletal Type	Protein Coding	51	GC11P002153	1.64482	https://www.genecards.org/cgi-bin/carddisp.pl?gene=TNNI2
Ulcerative colitis	MANBA	Mannosidase Beta	Protein Coding	50	GC04M102631	1.64482	https://www.genecards.org/cgi-bin/carddisp.pl?gene=MANBA
Ulcerative colitis	PMPCA	Peptidase, Mitochondrial Processing Subunit Alpha	Protein Coding	50	GC09P136410	1.64482	https://www.genecards.org/cgi-bin/carddisp.pl?gene=PMPCA
Ulcerative colitis	PNKD	PNKD Metallo-Beta-Lactamase Domain Containing	Protein Coding	49	GC02P218270	1.64482	https://www.genecards.org/cgi-bin/carddisp.pl?gene=PNKD
Ulcerative colitis	SPRED2	Sprouty Related EVH1 Domain Containing 2	Protein Coding	49	GC02M065307	1.64482	https://www.genecards.org/cgi-bin/carddisp.pl?gene=SPRED2
Ulcerative colitis	BRD7	Bromodomain Containing 7	Protein Coding	48	GC16M050313	1.64482	https://www.genecards.org/cgi-bin/carddisp.pl?gene=BRD7
Ulcerative colitis	CALM3	Calmodulin 3	Protein Coding	48	GC19P046601	1.64482	https://www.genecards.org/cgi-bin/carddisp.pl?gene=CALM3
Ulcerative colitis	CD6	CD6 Molecule	Protein Coding	48	GC11P060971	1.64482	https://www.genecards.org/cgi-bin/carddisp.pl?gene=CD6
Ulcerative colitis	FIBP	FGF1 Intracellular Binding Protein	Protein Coding	48	GC11M099734	1.64482	https://www.genecards.org/cgi-bin/carddisp.pl?gene=FIBP
Ulcerative colitis	NDUFAF1	NADH:Ubiquinone Oxidoreductase Complex Assembly Factor 1	Protein Coding	48	GC15M041387	1.64482	https://www.genecards.org/cgi-bin/carddisp.pl?gene=NDUFAF1
Ulcerative colitis	ACSL6	Acyl-CoA Synthetase Long Chain Family Member 6	Protein Coding	47	GC05M131949	1.64482	https://www.genecards.org/cgi-bin/carddisp.pl?gene=ACSL6
Ulcerative colitis	CTDSP1	CTD Small Phosphatase 1	Protein Coding	47	GC02P218398	1.64482	https://www.genecards.org/cgi-bin/carddisp.pl?gene=CTDSP1
Ulcerative colitis	DUSP16	Dual Specificity Phosphatase 16	Protein Coding	47	GC12M012473	1.64482	https://www.genecards.org/cgi-bin/carddisp.pl?gene=DUSP16
Ulcerative colitis	LPXN	Leupaxin	Protein Coding	47	GC11M099445	1.64482	https://www.genecards.org/cgi-bin/carddisp.pl?gene=LPXN
Ulcerative colitis	CHP1	Calcineurin Like EF-Hand Protein 1	Protein Coding	46	GC15P041230	1.64482	https://www.genecards.org/cgi-bin/carddisp.pl?gene=CHP1
Ulcerative colitis	CRTC3	CREB Regulated Transcription Coactivator 3	Protein Coding	46	GC15P090529	1.64482	https://www.genecards.org/cgi-bin/carddisp.pl?gene=CRTC3
Ulcerative colitis	ITPKA	Inositol-Trisphosphate 3-Kinase A	Protein Coding	46	GC15P041493	1.64482	https://www.genecards.org/cgi-bin/carddisp.pl?gene=ITPKA
Ulcerative colitis	SKAP2	Src Kinase Associated Phosphoprotein 2	Protein Coding	46	GC07M026654	1.64482	https://www.genecards.org/cgi-bin/carddisp.pl?gene=SKAP2
Ulcerative colitis	PDLIM4	PDZ And LIM Domain 4	Protein Coding	45	GC05P132257	1.64482	https://www.genecards.org/cgi-bin/carddisp.pl?gene=PDLIM4
Ulcerative colitis	DOK3	Docking Protein 3	Protein Coding	44	GC05M177501	1.64482	https://www.genecards.org/cgi-bin/carddisp.pl?gene=DOK3
Ulcerative colitis	FCRLA	Fc Receptor Like A	Protein Coding	44	GC01P161826	1.64482	https://www.genecards.org/cgi-bin/carddisp.pl?gene=FCRLA
Ulcerative colitis	NDFIP1	Nedd4 Family Interacting Protein 1	Protein Coding	44	GC05P142108	1.64482	https://www.genecards.org/cgi-bin/carddisp.pl?gene=NDFIP1
Ulcerative colitis	SLC39A11	Solute Carrier Family 39 Member 11	Protein Coding	44	GC17M072645	1.64482	https://www.genecards.org/cgi-bin/carddisp.pl?gene=SLC39A11
Ulcerative colitis	SLC7A10	Solute Carrier Family 7 Member 10	Protein Coding	44	GC19M033208	1.64482	https://www.genecards.org/cgi-bin/carddisp.pl?gene=SLC7A10
Ulcerative colitis	THADA	THADA Armadillo Repeat Containing	Protein Coding	44	GC02M043193	1.64482	https://www.genecards.org/cgi-bin/carddisp.pl?gene=THADA
Ulcerative colitis	CPEB4	Cytoplasmic Polyadenylation Element Binding Protein 4	Protein Coding	43	GC05P173888	1.64482	https://www.genecards.org/cgi-bin/carddisp.pl?gene=CPEB4
Ulcerative colitis	SFMBT1	Scm Like With Four Mbt Domains 1	Protein Coding	43	GC03M052965	1.64482	https://www.genecards.org/cgi-bin/carddisp.pl?gene=SFMBT1
Ulcerative colitis	TMBIM1	Transmembrane BAX Inhibitor Motif Containing 1	Protein Coding	43	GC02M218274	1.64482	https://www.genecards.org/cgi-bin/carddisp.pl?gene=TMBIM1
Ulcerative colitis	TSPAN14	Tetraspanin 14	Protein Coding	43	GC10P094471	1.64482	https://www.genecards.org/cgi-bin/carddisp.pl?gene=TSPAN14
Ulcerative colitis	ARHGAP30	Rho GTPase Activating Protein 30	Protein Coding	42	GC01M161046	1.64482	https://www.genecards.org/cgi-bin/carddisp.pl?gene=ARHGAP30
Ulcerative colitis	DENND1B	DENN Domain Containing 1B	Protein Coding	42	GC01M197473	1.64482	https://www.genecards.org/cgi-bin/carddisp.pl?gene=DENND1B
Ulcerative colitis	PHTF1	Putative Homeodomain Transcription Factor 1	Protein Coding	42	GC01M113696	1.64482	https://www.genecards.org/cgi-bin/carddisp.pl?gene=PHTF1
Ulcerative colitis	SNX32	Sorting Nexin 32	Protein Coding	42	GC11P065833	1.64482	https://www.genecards.org/cgi-bin/carddisp.pl?gene=SNX32
Ulcerative colitis	ZNF300	Zinc Finger Protein 300	Protein Coding	42	GC05M150894	1.64482	https://www.genecards.org/cgi-bin/carddisp.pl?gene=ZNF300
Ulcerative colitis	TTYH3	Tweety Family Member 3	Protein Coding	40	GC07P003479	1.64482	https://www.genecards.org/cgi-bin/carddisp.pl?gene=TTYH3
Ulcerative colitis	CCDC116	Coiled-Coil Domain Containing 116	Protein Coding	39	GC22P045419	1.64482	https://www.genecards.org/cgi-bin/carddisp.pl?gene=CCDC116
Ulcerative colitis	JRKL	JRK Like	Protein Coding	39	GC11P096389	1.64482	https://www.genecards.org/cgi-bin/carddisp.pl?gene=JRKL
Ulcerative colitis	NUSAP1	Nucleolar And Spindle Associated Protein 1	Protein Coding	39	GC15P046478	1.64482	https://www.genecards.org/cgi-bin/carddisp.pl?gene=NUSAP1
Ulcerative colitis	NXPE4	Neurexophilin And PC-Esterase Domain Family Member 4	Protein Coding	39	GC11M114570	1.64482	https://www.genecards.org/cgi-bin/carddisp.pl?gene=NXPE4
Ulcerative colitis	RFTN2	Raftlin Family Member 2	Protein Coding	39	GC02M197568	1.64482	https://www.genecards.org/cgi-bin/carddisp.pl?gene=RFTN2
Ulcerative colitis	TMEM50B	Transmembrane Protein 50B	Protein Coding	39	GC21M033432	1.64482	https://www.genecards.org/cgi-bin/carddisp.pl?gene=TMEM50B
Ulcerative colitis	YDJC	YdjC Chitooligosaccharide Deacetylase Homolog	Protein Coding	39	GC22M021628	1.64482	https://www.genecards.org/cgi-bin/carddisp.pl?gene=YDJC
Ulcerative colitis	CCDC85B	Coiled-Coil Domain Containing 85B	Protein Coding	38	GC11P065890	1.64482	https://www.genecards.org/cgi-bin/carddisp.pl?gene=CCDC85B
Ulcerative colitis	LIME1	Lck Interacting Transmembrane Adaptor 1	Protein Coding	38	GC20P063736	1.64482	https://www.genecards.org/cgi-bin/carddisp.pl?gene=LIME1
Ulcerative colitis	ZNF831	Zinc Finger Protein 831	Protein Coding	38	GC20P059126	1.64482	https://www.genecards.org/cgi-bin/carddisp.pl?gene=ZNF831
Ulcerative colitis	PUSL1	Pseudouridine Synthase Like 1	Protein Coding	37	GC01P001308	1.64482	https://www.genecards.org/cgi-bin/carddisp.pl?gene=PUSL1
Ulcerative colitis	SANBR	SANT And BTB Domain Regulator Of CSR	Protein Coding	37	GC02P061068	1.64482	https://www.genecards.org/cgi-bin/carddisp.pl?gene=SANBR
Ulcerative colitis	C10orf55	Chromosome 10 Putative Open Reading Frame 55	RNA Gene	33	GC10M073909	1.64482	https://www.genecards.org/cgi-bin/carddisp.pl?gene=C10orf55
Ulcerative colitis	AHSA2P	Activator Of HSP90 ATPase Homolog 2, Pseudogene	Pseudogene	31	GC02P061179	1.64482	https://www.genecards.org/cgi-bin/carddisp.pl?gene=AHSA2P
Ulcerative colitis	IRF1-AS1	IRF1 Antisense RNA 1	RNA Gene	29	GC05P132422	1.64482	https://www.genecards.org/cgi-bin/carddisp.pl?gene=IRF1-AS1
Ulcerative colitis	TRAF3IP2-AS1	TRAF3IP2 Antisense RNA 1	RNA Gene	22	GC06P111484	1.64482	https://www.genecards.org/cgi-bin/carddisp.pl?gene=TRAF3IP2-AS1
Ulcerative colitis	TEX41	Testis Expressed 41	RNA Gene	21	GC02P144386	1.64482	https://www.genecards.org/cgi-bin/carddisp.pl?gene=TEX41
Ulcerative colitis	ZNF300P1	Zinc Finger Protein 300 Pseudogene 1	Pseudogene	16	GC05M150930	1.64482	https://www.genecards.org/cgi-bin/carddisp.pl?gene=ZNF300P1
Ulcerative colitis	FOSL2-AS1	FOSL2 Antisense RNA 1	RNA Gene	13	GC02M028387	1.64482	https://www.genecards.org/cgi-bin/carddisp.pl?gene=FOSL2-AS1
Ulcerative colitis	TERF2IP	TERF2 Interacting Protein	Protein Coding	48	GC16P075647	1.64474	https://www.genecards.org/cgi-bin/carddisp.pl?gene=TERF2IP
Ulcerative colitis	ZEB1	Zinc Finger E-Box Binding Homeobox 1	Protein Coding	56	GC10P031318	1.64437	https://www.genecards.org/cgi-bin/carddisp.pl?gene=ZEB1
Ulcerative colitis	PPL	Periplakin	Protein Coding	46	GC16M008310	1.64333	https://www.genecards.org/cgi-bin/carddisp.pl?gene=PPL
Ulcerative colitis	AHSG	Alpha 2-HS Glycoprotein	Protein Coding	51	GC03P186636	1.64308	https://www.genecards.org/cgi-bin/carddisp.pl?gene=AHSG
Ulcerative colitis	LGALS3BP	Galectin 3 Binding Protein	Protein Coding	48	GC17M078971	1.64243	https://www.genecards.org/cgi-bin/carddisp.pl?gene=LGALS3BP
Ulcerative colitis	BVES	Blood Vessel Epicardial Substance	Protein Coding	48	GC06M105096	1.63992	https://www.genecards.org/cgi-bin/carddisp.pl?gene=BVES
Ulcerative colitis	CD3G	CD3 Gamma Subunit Of T-Cell Receptor Complex	Protein Coding	54	GC11P118344	1.63813	https://www.genecards.org/cgi-bin/carddisp.pl?gene=CD3G
Ulcerative colitis	BICD1	BICD Cargo Adaptor 1	Protein Coding	46	GC12P032107	1.63813	https://www.genecards.org/cgi-bin/carddisp.pl?gene=BICD1
Ulcerative colitis	TNRC6A	Trinucleotide Repeat Containing Adaptor 6A	Protein Coding	46	GC16P024705	1.63813	https://www.genecards.org/cgi-bin/carddisp.pl?gene=TNRC6A
Ulcerative colitis	PSMC3IP	PSMC3 Interacting Protein	Protein Coding	44	GC17M042572	1.63813	https://www.genecards.org/cgi-bin/carddisp.pl?gene=PSMC3IP
Ulcerative colitis	NSD1	Nuclear Receptor Binding SET Domain Protein 1	Protein Coding	51	GC05P177646	1.63813	https://www.genecards.org/cgi-bin/carddisp.pl?gene=NSD1
Ulcerative colitis	FLVCR2	FLVCR Heme Transporter 2	Protein Coding	47	GC14P075578	1.63813	https://www.genecards.org/cgi-bin/carddisp.pl?gene=FLVCR2
Ulcerative colitis	NPY	Neuropeptide Y	Protein Coding	51	GC07P024290	1.63585	https://www.genecards.org/cgi-bin/carddisp.pl?gene=NPY
Ulcerative colitis	USP21	Ubiquitin Specific Peptidase 21	Protein Coding	45	GC01P161159	1.63545	https://www.genecards.org/cgi-bin/carddisp.pl?gene=USP21
Ulcerative colitis	GZMM	Granzyme M	Protein Coding	46	GC19P000544	1.63481	https://www.genecards.org/cgi-bin/carddisp.pl?gene=GZMM
Ulcerative colitis	MIR425	MicroRNA 425	RNA Gene	22	GC03M051544	1.63263	https://www.genecards.org/cgi-bin/carddisp.pl?gene=MIR425
Ulcerative colitis	HHEX	Hematopoietically Expressed Homeobox	Protein Coding	46	GC10P092689	1.63246	https://www.genecards.org/cgi-bin/carddisp.pl?gene=HHEX
Ulcerative colitis	PRSS1	Serine Protease 1	Protein Coding	51	GC07P149953	1.63063	https://www.genecards.org/cgi-bin/carddisp.pl?gene=PRSS1
Ulcerative colitis	NPHP1	Nephrocystin 1	Protein Coding	50	GC02M110122	1.63063	https://www.genecards.org/cgi-bin/carddisp.pl?gene=NPHP1
Ulcerative colitis	ABCB8	ATP Binding Cassette Subfamily B Member 8	Protein Coding	48	GC07P151028	1.63063	https://www.genecards.org/cgi-bin/carddisp.pl?gene=ABCB8
Ulcerative colitis	TNFRSF10C	TNF Receptor Superfamily Member 10c	Protein Coding	47	GC08P023102	1.63063	https://www.genecards.org/cgi-bin/carddisp.pl?gene=TNFRSF10C
Ulcerative colitis	NACA	Nascent Polypeptide Associated Complex Subunit Alpha	Protein Coding	45	GC12M056712	1.63063	https://www.genecards.org/cgi-bin/carddisp.pl?gene=NACA
Ulcerative colitis	CSNK1A1L	Casein Kinase 1 Alpha 1 Like	Protein Coding	42	GC13M037103	1.63063	https://www.genecards.org/cgi-bin/carddisp.pl?gene=CSNK1A1L
Ulcerative colitis	FAM215A	Family With Sequence Similarity 215 Member A	RNA Gene	28	GC17P043917	1.63063	https://www.genecards.org/cgi-bin/carddisp.pl?gene=FAM215A
Ulcerative colitis	BORCS8-MEF2B	BORCS8-MEF2B Readthrough	Protein Coding	27	GC19M019146	1.63063	https://www.genecards.org/cgi-bin/carddisp.pl?gene=BORCS8-MEF2B
Ulcerative colitis	OCTN3	Organic Cation Transporter 3	Protein Coding	4	GC05U900771	1.63063	https://www.genecards.org/cgi-bin/carddisp.pl?gene=OCTN3
Ulcerative colitis	HDAC3	Histone Deacetylase 3	Protein Coding	56	GC05M141620	1.62846	https://www.genecards.org/cgi-bin/carddisp.pl?gene=HDAC3
Ulcerative colitis	TIAM1	TIAM Rac1 Associated GEF 1	Protein Coding	51	GC21M031118	1.62846	https://www.genecards.org/cgi-bin/carddisp.pl?gene=TIAM1
Ulcerative colitis	CTBP2	C-Terminal Binding Protein 2	Protein Coding	50	GC10M124984	1.62846	https://www.genecards.org/cgi-bin/carddisp.pl?gene=CTBP2
Ulcerative colitis	TCF7	Transcription Factor 7	Protein Coding	50	GC05P134114	1.62846	https://www.genecards.org/cgi-bin/carddisp.pl?gene=TCF7
Ulcerative colitis	WNT16	Wnt Family Member 16	Protein Coding	47	GC07P121325	1.62846	https://www.genecards.org/cgi-bin/carddisp.pl?gene=WNT16
Ulcerative colitis	CDCP1	CUB Domain Containing Protein 1	Protein Coding	46	GC03M045082	1.62846	https://www.genecards.org/cgi-bin/carddisp.pl?gene=CDCP1
Ulcerative colitis	MDC1	Mediator Of DNA Damage Checkpoint 1	Protein Coding	48	GC06M071645	1.62705	https://www.genecards.org/cgi-bin/carddisp.pl?gene=MDC1
Ulcerative colitis	TRAF3	TNF Receptor Associated Factor 3	Protein Coding	53	GC14P110622	1.62638	https://www.genecards.org/cgi-bin/carddisp.pl?gene=TRAF3
Ulcerative colitis	TBK1	TANK Binding Kinase 1	Protein Coding	56	GC12P064451	1.62131	https://www.genecards.org/cgi-bin/carddisp.pl?gene=TBK1
Ulcerative colitis	DDIT4	DNA Damage Inducible Transcript 4	Protein Coding	48	GC10P072273	1.62126	https://www.genecards.org/cgi-bin/carddisp.pl?gene=DDIT4
Ulcerative colitis	DEFB104A	Defensin Beta 104A	Protein Coding	36	GC08P007836	1.62126	https://www.genecards.org/cgi-bin/carddisp.pl?gene=DEFB104A
Ulcerative colitis	MIR4284	MicroRNA 4284	RNA Gene	16	GC07P073711	1.62126	https://www.genecards.org/cgi-bin/carddisp.pl?gene=MIR4284
Ulcerative colitis	SATB1	SATB Homeobox 1	Protein Coding	51	GC03M021920	1.62106	https://www.genecards.org/cgi-bin/carddisp.pl?gene=SATB1
Ulcerative colitis	LEPQTL1	Leptin, Serum Levels Of	Genetic Locus	3	GC02U903086	1.61983	https://www.genecards.org/cgi-bin/carddisp.pl?gene=LEPQTL1
Ulcerative colitis	HLA-DMB	Major Histocompatibility Complex, Class II, DM Beta	Protein Coding	46	GC06M032934	1.6186	https://www.genecards.org/cgi-bin/carddisp.pl?gene=HLA-DMB
Ulcerative colitis	SLC9A1	Solute Carrier Family 9 Member A1	Protein Coding	57	GC01M027239	1.61756	https://www.genecards.org/cgi-bin/carddisp.pl?gene=SLC9A1
Ulcerative colitis	TRIM33	Tripartite Motif Containing 33	Protein Coding	51	GC01M114392	1.61588	https://www.genecards.org/cgi-bin/carddisp.pl?gene=TRIM33
Ulcerative colitis	P2RX7	Purinergic Receptor P2X 7	Protein Coding	54	GC12P126979	1.61367	https://www.genecards.org/cgi-bin/carddisp.pl?gene=P2RX7
Ulcerative colitis	ADH1B	Alcohol Dehydrogenase 1B (Class I), Beta Polypeptide	Protein Coding	50	GC04M099304	1.6115	https://www.genecards.org/cgi-bin/carddisp.pl?gene=ADH1B
Ulcerative colitis	FCGR1A	Fc Gamma Receptor Ia	Protein Coding	48	GC01P150388	1.6114	https://www.genecards.org/cgi-bin/carddisp.pl?gene=FCGR1A
Ulcerative colitis	BMI1	BMI1 Proto-Oncogene, Polycomb Ring Finger	Protein Coding	50	GC10P022326	1.61138	https://www.genecards.org/cgi-bin/carddisp.pl?gene=BMI1
Ulcerative colitis	CYP21A1P	Cytochrome P450 Family 21 Subfamily A Member 1, Pseudogene	Pseudogene	18	GC06P032005	1.61136	https://www.genecards.org/cgi-bin/carddisp.pl?gene=CYP21A1P
Ulcerative colitis	HLA-DQB1-AS1	HLA-DQB1 Antisense RNA 1	RNA Gene	17	GC06P032659	1.61136	https://www.genecards.org/cgi-bin/carddisp.pl?gene=HLA-DQB1-AS1
Ulcerative colitis	HLA-DRB6	Major Histocompatibility Complex, Class II, DR Beta 6 (Pseudogene)	Pseudogene	17	GC06M071770	1.61136	https://www.genecards.org/cgi-bin/carddisp.pl?gene=HLA-DRB6
Ulcerative colitis	IGFBP1	Insulin Like Growth Factor Binding Protein 1	Protein Coding	50	GC07P048184	1.60951	https://www.genecards.org/cgi-bin/carddisp.pl?gene=IGFBP1
Ulcerative colitis	TPO	Thyroid Peroxidase	Protein Coding	56	GC02P001374	1.60858	https://www.genecards.org/cgi-bin/carddisp.pl?gene=TPO
Ulcerative colitis	ATP1A1	ATPase Na+/K+ Transporting Subunit Alpha 1	Protein Coding	57	GC01P116372	1.60661	https://www.genecards.org/cgi-bin/carddisp.pl?gene=ATP1A1
Ulcerative colitis	MIR29B1	MicroRNA 29b-1	RNA Gene	23	GC07M130877	1.60618	https://www.genecards.org/cgi-bin/carddisp.pl?gene=MIR29B1
Ulcerative colitis	RUNX2	RUNX Family Transcription Factor 2	Protein Coding	53	GC06P092371	1.60605	https://www.genecards.org/cgi-bin/carddisp.pl?gene=RUNX2
Ulcerative colitis	OSMR	Oncostatin M Receptor	Protein Coding	52	GC05P038845	1.60578	https://www.genecards.org/cgi-bin/carddisp.pl?gene=OSMR
Ulcerative colitis	NHEJ1	Non-Homologous End Joining Factor 1	Protein Coding	48	GC02M219131	1.60469	https://www.genecards.org/cgi-bin/carddisp.pl?gene=NHEJ1
Ulcerative colitis	CASC2	Cancer Susceptibility 2	RNA Gene	29	GC10P118046	1.60171	https://www.genecards.org/cgi-bin/carddisp.pl?gene=CASC2
Ulcerative colitis	BTRC	Beta-Transducin Repeat Containing E3 Ubiquitin Protein Ligase	Protein Coding	52	GC10P101354	1.60168	https://www.genecards.org/cgi-bin/carddisp.pl?gene=BTRC
Ulcerative colitis	FGFR4	Fibroblast Growth Factor Receptor 4	Protein Coding	59	GC05P177086	1.60015	https://www.genecards.org/cgi-bin/carddisp.pl?gene=FGFR4
Ulcerative colitis	SOCS2	Suppressor Of Cytokine Signaling 2	Protein Coding	50	GC12P093569	1.59953	https://www.genecards.org/cgi-bin/carddisp.pl?gene=SOCS2
Ulcerative colitis	MAGEA1	MAGE Family Member A1	Protein Coding	42	GC0XP153179	1.59839	https://www.genecards.org/cgi-bin/carddisp.pl?gene=MAGEA1
Ulcerative colitis	TIA1	TIA1 Cytotoxic Granule Associated RNA Binding Protein	Protein Coding	48	GC02M070209	1.59705	https://www.genecards.org/cgi-bin/carddisp.pl?gene=TIA1
Ulcerative colitis	SOAT1	Sterol O-Acyltransferase 1	Protein Coding	51	GC01P179262	1.59488	https://www.genecards.org/cgi-bin/carddisp.pl?gene=SOAT1
Ulcerative colitis	RASGRF1	Ras Protein Specific Guanine Nucleotide Releasing Factor 1	Protein Coding	50	GC15M078959	1.59481	https://www.genecards.org/cgi-bin/carddisp.pl?gene=RASGRF1
Ulcerative colitis	CYTH1	Cytohesin 1	Protein Coding	48	GC17M078674	1.59452	https://www.genecards.org/cgi-bin/carddisp.pl?gene=CYTH1
Ulcerative colitis	ALOX15B	Arachidonate 15-Lipoxygenase Type B	Protein Coding	48	GC17P008039	1.59296	https://www.genecards.org/cgi-bin/carddisp.pl?gene=ALOX15B
Ulcerative colitis	AIM2	Absent In Melanoma 2	Protein Coding	48	GC01M159062	1.59262	https://www.genecards.org/cgi-bin/carddisp.pl?gene=AIM2
Ulcerative colitis	RAB11A	RAB11A, Member RAS Oncogene Family	Protein Coding	52	GC15P123392	1.59197	https://www.genecards.org/cgi-bin/carddisp.pl?gene=RAB11A
Ulcerative colitis	AKT2	AKT Serine/Threonine Kinase 2	Protein Coding	61	GC19M040230	1.59181	https://www.genecards.org/cgi-bin/carddisp.pl?gene=AKT2
Ulcerative colitis	AKT3	AKT Serine/Threonine Kinase 3	Protein Coding	61	GC01M243488	1.59181	https://www.genecards.org/cgi-bin/carddisp.pl?gene=AKT3
Ulcerative colitis	SGK1	Serum/Glucocorticoid Regulated Kinase 1	Protein Coding	56	GC06M134169	1.59071	https://www.genecards.org/cgi-bin/carddisp.pl?gene=SGK1
Ulcerative colitis	ACAT2	Acetyl-CoA Acetyltransferase 2	Protein Coding	51	GC06P160802	1.59006	https://www.genecards.org/cgi-bin/carddisp.pl?gene=ACAT2
Ulcerative colitis	TUBB6	Tubulin Beta 6 Class V	Protein Coding	49	GC18P012307	1.59006	https://www.genecards.org/cgi-bin/carddisp.pl?gene=TUBB6
Ulcerative colitis	PRDX4	Peroxiredoxin 4	Protein Coding	47	GC0XP023665	1.59006	https://www.genecards.org/cgi-bin/carddisp.pl?gene=PRDX4
Ulcerative colitis	DNAJC15	DnaJ Heat Shock Protein Family (Hsp40) Member C15	Protein Coding	43	GC13P043023	1.59006	https://www.genecards.org/cgi-bin/carddisp.pl?gene=DNAJC15
Ulcerative colitis	MIR206	MicroRNA 206	RNA Gene	23	GC06P052144	1.59006	https://www.genecards.org/cgi-bin/carddisp.pl?gene=MIR206
Ulcerative colitis	MIR506	MicroRNA 506	RNA Gene	17	GC0XM147230	1.59006	https://www.genecards.org/cgi-bin/carddisp.pl?gene=MIR506
Ulcerative colitis	KCNQ1	Potassium Voltage-Gated Channel Subfamily Q Member 1	Protein Coding	57	GC11P002444	1.58996	https://www.genecards.org/cgi-bin/carddisp.pl?gene=KCNQ1
Ulcerative colitis	SOD3	Superoxide Dismutase 3	Protein Coding	50	GC04P024798	1.58745	https://www.genecards.org/cgi-bin/carddisp.pl?gene=SOD3
Ulcerative colitis	DSC2	Desmocollin 2	Protein Coding	53	GC18M031058	1.58718	https://www.genecards.org/cgi-bin/carddisp.pl?gene=DSC2
Ulcerative colitis	GLI3	GLI Family Zinc Finger 3	Protein Coding	56	GC07M041960	1.58126	https://www.genecards.org/cgi-bin/carddisp.pl?gene=GLI3
Ulcerative colitis	NNMT	Nicotinamide N-Methyltransferase	Protein Coding	51	GC11P114257	1.58039	https://www.genecards.org/cgi-bin/carddisp.pl?gene=NNMT
Ulcerative colitis	CAMK4	Calcium/Calmodulin Dependent Protein Kinase IV	Protein Coding	52	GC05P111223	1.57812	https://www.genecards.org/cgi-bin/carddisp.pl?gene=CAMK4
Ulcerative colitis	PRDM16	PR/SET Domain 16	Protein Coding	52	GC01P004441	1.57482	https://www.genecards.org/cgi-bin/carddisp.pl?gene=PRDM16
Ulcerative colitis	MIR216A	MicroRNA 216a	RNA Gene	23	GC02M055988	1.57469	https://www.genecards.org/cgi-bin/carddisp.pl?gene=MIR216A
Ulcerative colitis	MIR130B	MicroRNA 130b	RNA Gene	22	GC22P045995	1.57469	https://www.genecards.org/cgi-bin/carddisp.pl?gene=MIR130B
Ulcerative colitis	HRH3	Histamine Receptor H3	Protein Coding	49	GC20M062214	1.57461	https://www.genecards.org/cgi-bin/carddisp.pl?gene=HRH3
Ulcerative colitis	REG1B	Regenerating Family Member 1 Beta	Protein Coding	43	GC02M079086	1.57249	https://www.genecards.org/cgi-bin/carddisp.pl?gene=REG1B
Ulcerative colitis	FNIP1	Folliculin Interacting Protein 1	Protein Coding	44	GC05M131641	1.5719	https://www.genecards.org/cgi-bin/carddisp.pl?gene=FNIP1
[truncated: 3,140 more rows]

## Sheet: CD_genecards
Disease	Gene Symbol	Description	Category	Gifts	GC Id	Relevance score	GeneCards Link
CROHN'S DISEASE	NOD2	Nucleotide Binding Oligomerization Domain Containing 2	Protein Coding	55	GC16P050693	118.585	https://www.genecards.org/cgi-bin/carddisp.pl?gene=NOD2
CROHN'S DISEASE	IL6	Interleukin 6	Protein Coding	58	GC07P022725	76.8951	https://www.genecards.org/cgi-bin/carddisp.pl?gene=IL6
CROHN'S DISEASE	PKHD1	PKHD1 Ciliary IPT Domain Containing Fibrocystin/Polyductin	Protein Coding	45	GC06M072064	73.5287	https://www.genecards.org/cgi-bin/carddisp.pl?gene=PKHD1
CROHN'S DISEASE	TNF	Tumor Necrosis Factor	Protein Coding	59	GC06P092154	69.7085	https://www.genecards.org/cgi-bin/carddisp.pl?gene=TNF
CROHN'S DISEASE	IL10	Interleukin 10	Protein Coding	55	GC01M206767	65.8608	https://www.genecards.org/cgi-bin/carddisp.pl?gene=IL10
CROHN'S DISEASE	GBA1	Glucosylceramidase Beta 1	Protein Coding	55	GC01M155375	62.4235	https://www.genecards.org/cgi-bin/carddisp.pl?gene=GBA1
CROHN'S DISEASE	APOE	Apolipoprotein E	Protein Coding	57	GC19P073055	59.5486	https://www.genecards.org/cgi-bin/carddisp.pl?gene=APOE
CROHN'S DISEASE	APP	Amyloid Beta Precursor Protein	Protein Coding	58	GC21M025880	59.3117	https://www.genecards.org/cgi-bin/carddisp.pl?gene=APP
CROHN'S DISEASE	LMNA	Lamin A/C	Protein Coding	56	GC01P156082	59.0293	https://www.genecards.org/cgi-bin/carddisp.pl?gene=LMNA
CROHN'S DISEASE	LRRK2	Leucine Rich Repeat Kinase 2	Protein Coding	56	GC12P040196	56.9885	https://www.genecards.org/cgi-bin/carddisp.pl?gene=LRRK2
CROHN'S DISEASE	VWF	Von Willebrand Factor	Protein Coding	55	GC12M005949	55.3392	https://www.genecards.org/cgi-bin/carddisp.pl?gene=VWF
CROHN'S DISEASE	CTLA4	Cytotoxic T-Lymphocyte Associated Protein 4	Protein Coding	54	GC02P203854	53.8035	https://www.genecards.org/cgi-bin/carddisp.pl?gene=CTLA4
CROHN'S DISEASE	TGFB1	Transforming Growth Factor Beta 1	Protein Coding	60	GC19M041301	51.0317	https://www.genecards.org/cgi-bin/carddisp.pl?gene=TGFB1
CROHN'S DISEASE	NF1	Neurofibromin 1	Protein Coding	54	GC17P031094	50.9058	https://www.genecards.org/cgi-bin/carddisp.pl?gene=NF1
CROHN'S DISEASE	RET	Ret Proto-Oncogene	Protein Coding	61	GC10P043237	50.5279	https://www.genecards.org/cgi-bin/carddisp.pl?gene=RET
CROHN'S DISEASE	PRKN	Parkin RBR E3 Ubiquitin Protein Ligase	Protein Coding	53	GC06M161348	50.1398	https://www.genecards.org/cgi-bin/carddisp.pl?gene=PRKN
CROHN'S DISEASE	MAPT	Microtubule Associated Protein Tau	Protein Coding	57	GC17P045894	47.6076	https://www.genecards.org/cgi-bin/carddisp.pl?gene=MAPT
CROHN'S DISEASE	VCP	Valosin Containing Protein	Protein Coding	57	GC09M035056	47.4689	https://www.genecards.org/cgi-bin/carddisp.pl?gene=VCP
CROHN'S DISEASE	SQSTM1	Sequestosome 1	Protein Coding	55	GC05P179806	46.3574	https://www.genecards.org/cgi-bin/carddisp.pl?gene=SQSTM1
CROHN'S DISEASE	IL23R	Interleukin 23 Receptor	Protein Coding	52	GC01P067138	46.2217	https://www.genecards.org/cgi-bin/carddisp.pl?gene=IL23R
CROHN'S DISEASE	IL1B	Interleukin 1 Beta	Protein Coding	54	GC02M112829	45.7255	https://www.genecards.org/cgi-bin/carddisp.pl?gene=IL1B
CROHN'S DISEASE	TLR4	Toll Like Receptor 4	Protein Coding	58	GC09P117704	45.6623	https://www.genecards.org/cgi-bin/carddisp.pl?gene=TLR4
CROHN'S DISEASE	PRKCQ	Protein Kinase C Theta	Protein Coding	55	GC10M006591	45.4271	https://www.genecards.org/cgi-bin/carddisp.pl?gene=PRKCQ
CROHN'S DISEASE	IFNG	Interferon Gamma	Protein Coding	57	GC12M068154	45.3726	https://www.genecards.org/cgi-bin/carddisp.pl?gene=IFNG
CROHN'S DISEASE	TP53	Tumor Protein P53	Protein Coding	60	GC17M007661	45.1988	https://www.genecards.org/cgi-bin/carddisp.pl?gene=TP53
CROHN'S DISEASE	CRP	C-Reactive Protein	Protein Coding	53	GC01M159729	44.6875	https://www.genecards.org/cgi-bin/carddisp.pl?gene=CRP
CROHN'S DISEASE	HLA-DRB1	Major Histocompatibility Complex, Class II, DR Beta 1	Protein Coding	53	GC06M071772	44.4335	https://www.genecards.org/cgi-bin/carddisp.pl?gene=HLA-DRB1
CROHN'S DISEASE	HLA-B	Major Histocompatibility Complex, Class I, B	Protein Coding	52	GC06M071682	42.1644	https://www.genecards.org/cgi-bin/carddisp.pl?gene=HLA-B
CROHN'S DISEASE	SLC17A5	Solute Carrier Family 17 Member 5	Protein Coding	51	GC06M073593	42.0198	https://www.genecards.org/cgi-bin/carddisp.pl?gene=SLC17A5
CROHN'S DISEASE	STAT3	Signal Transducer And Activator Of Transcription 3	Protein Coding	61	GC17M042313	41.5325	https://www.genecards.org/cgi-bin/carddisp.pl?gene=STAT3
CROHN'S DISEASE	ACE	Angiotensin I Converting Enzyme	Protein Coding	59	GC17P063477	41.4615	https://www.genecards.org/cgi-bin/carddisp.pl?gene=ACE
CROHN'S DISEASE	CYBB	Cytochrome B-245 Beta Chain	Protein Coding	56	GC0XP037780	41.2601	https://www.genecards.org/cgi-bin/carddisp.pl?gene=CYBB
CROHN'S DISEASE	PARK7	Parkinsonism Associated Deglycase	Protein Coding	54	GC01P008140	41.0207	https://www.genecards.org/cgi-bin/carddisp.pl?gene=PARK7
CROHN'S DISEASE	MIR21	MicroRNA 21	RNA Gene	26	GC17P063092	39.8868	https://www.genecards.org/cgi-bin/carddisp.pl?gene=MIR21
CROHN'S DISEASE	ATG16L1	Autophagy Related 16 Like 1	Protein Coding	48	GC02P233260	39.1663	https://www.genecards.org/cgi-bin/carddisp.pl?gene=ATG16L1
CROHN'S DISEASE	IL10RA	Interleukin 10 Receptor Subunit Alpha	Protein Coding	53	GC11P117987	38.7318	https://www.genecards.org/cgi-bin/carddisp.pl?gene=IL10RA
CROHN'S DISEASE	HLA-DQB1	Major Histocompatibility Complex, Class II, DQ Beta 1	Protein Coding	48	GC06M071781	38.4877	https://www.genecards.org/cgi-bin/carddisp.pl?gene=HLA-DQB1
CROHN'S DISEASE	PTPN22	Protein Tyrosine Phosphatase Non-Receptor Type 22	Protein Coding	54	GC01M113813	38.3857	https://www.genecards.org/cgi-bin/carddisp.pl?gene=PTPN22
CROHN'S DISEASE	TLR2	Toll Like Receptor 2	Protein Coding	59	GC04P153684	38.1759	https://www.genecards.org/cgi-bin/carddisp.pl?gene=TLR2
CROHN'S DISEASE	GALC	Galactosylceramidase	Protein Coding	51	GC14M087837	37.9524	https://www.genecards.org/cgi-bin/carddisp.pl?gene=GALC
CROHN'S DISEASE	ABCA1	ATP Binding Cassette Subfamily A Member 1	Protein Coding	55	GC09M104781	37.935	https://www.genecards.org/cgi-bin/carddisp.pl?gene=ABCA1
CROHN'S DISEASE	NOS3	Nitric Oxide Synthase 3	Protein Coding	56	GC07P150990	37.4559	https://www.genecards.org/cgi-bin/carddisp.pl?gene=NOS3
CROHN'S DISEASE	CCL2	C-C Motif Chemokine Ligand 2	Protein Coding	56	GC17P034255	37.2667	https://www.genecards.org/cgi-bin/carddisp.pl?gene=CCL2
CROHN'S DISEASE	CFTR	CF Transmembrane Conductance Regulator	Protein Coding	59	GC07P117287	37.0782	https://www.genecards.org/cgi-bin/carddisp.pl?gene=CFTR
CROHN'S DISEASE	MPO	Myeloperoxidase	Protein Coding	59	GC17M058269	36.8967	https://www.genecards.org/cgi-bin/carddisp.pl?gene=MPO
CROHN'S DISEASE	ALB	Albumin	Protein Coding	56	GC04P073397	36.628	https://www.genecards.org/cgi-bin/carddisp.pl?gene=ALB
CROHN'S DISEASE	SLC37A4	Solute Carrier Family 37 Member 4	Protein Coding	48	GC11M119266	36.3653	https://www.genecards.org/cgi-bin/carddisp.pl?gene=SLC37A4
CROHN'S DISEASE	NAGLU	N-Acetyl-Alpha-Glucosaminidase	Protein Coding	49	GC17P061991	36.028	https://www.genecards.org/cgi-bin/carddisp.pl?gene=NAGLU
CROHN'S DISEASE	COL1A1	Collagen Type I Alpha 1 Chain	Protein Coding	56	GC17M052191	36.0132	https://www.genecards.org/cgi-bin/carddisp.pl?gene=COL1A1
CROHN'S DISEASE	MEFV	MEFV Innate Immunity Regulator, Pyrin	Protein Coding	51	GC16M008228	35.6123	https://www.genecards.org/cgi-bin/carddisp.pl?gene=MEFV
CROHN'S DISEASE	MT-ND1	Mitochondrially Encoded NADH:Ubiquinone Oxidoreductase Core Subunit 1	Protein Coding	36	GCMTP003309	35.3412	https://www.genecards.org/cgi-bin/carddisp.pl?gene=MT-ND1
CROHN'S DISEASE	SERPINA1	Serpin Family A Member 1	Protein Coding	56	GC14M094376	35.1091	https://www.genecards.org/cgi-bin/carddisp.pl?gene=SERPINA1
CROHN'S DISEASE	TERT	Telomerase Reverse Transcriptase	Protein Coding	58	GC05M001253	35.0196	https://www.genecards.org/cgi-bin/carddisp.pl?gene=TERT
CROHN'S DISEASE	CXCL8	C-X-C Motif Chemokine Ligand 8	Protein Coding	50	GC04P073740	34.9146	https://www.genecards.org/cgi-bin/carddisp.pl?gene=CXCL8
CROHN'S DISEASE	TNFRSF1A	TNF Receptor Superfamily Member 1A	Protein Coding	57	GC12M006328	34.3541	https://www.genecards.org/cgi-bin/carddisp.pl?gene=TNFRSF1A
CROHN'S DISEASE	EGR2	Early Growth Response 2	Protein Coding	51	GC10M062811	33.8592	https://www.genecards.org/cgi-bin/carddisp.pl?gene=EGR2
CROHN'S DISEASE	CCR6	C-C Motif Chemokine Receptor 6	Protein Coding	51	GC06P167111	33.6717	https://www.genecards.org/cgi-bin/carddisp.pl?gene=CCR6
CROHN'S DISEASE	DNM2	Dynamin 2	Protein Coding	56	GC19P010718	33.2669	https://www.genecards.org/cgi-bin/carddisp.pl?gene=DNM2
CROHN'S DISEASE	IL2	Interleukin 2	Protein Coding	53	GC04M122451	33.2408	https://www.genecards.org/cgi-bin/carddisp.pl?gene=IL2
CROHN'S DISEASE	IL4	Interleukin 4	Protein Coding	53	GC05P132673	33.2334	https://www.genecards.org/cgi-bin/carddisp.pl?gene=IL4
CROHN'S DISEASE	APOA1	Apolipoprotein A1	Protein Coding	57	GC11M116835	32.8679	https://www.genecards.org/cgi-bin/carddisp.pl?gene=APOA1
CROHN'S DISEASE	IL17A	Interleukin 17A	Protein Coding	50	GC06P052186	32.786	https://www.genecards.org/cgi-bin/carddisp.pl?gene=IL17A
CROHN'S DISEASE	LRP5	LDL Receptor Related Protein 5	Protein Coding	56	GC11P068298	32.7441	https://www.genecards.org/cgi-bin/carddisp.pl?gene=LRP5
CROHN'S DISEASE	EDNRB	Endothelin Receptor Type B	Protein Coding	56	GC13M077895	32.4725	https://www.genecards.org/cgi-bin/carddisp.pl?gene=EDNRB
CROHN'S DISEASE	CLCN5	Chloride Voltage-Gated Channel 5	Protein Coding	51	GC0XP049922	32.4438	https://www.genecards.org/cgi-bin/carddisp.pl?gene=CLCN5
CROHN'S DISEASE	GFAP	Glial Fibrillary Acidic Protein	Protein Coding	55	GC17M051925	32.3541	https://www.genecards.org/cgi-bin/carddisp.pl?gene=GFAP
CROHN'S DISEASE	NLRP3	NLR Family Pyrin Domain Containing 3	Protein Coding	55	GC01P247415	32.2254	https://www.genecards.org/cgi-bin/carddisp.pl?gene=NLRP3
CROHN'S DISEASE	CYBA	Cytochrome B-245 Alpha Chain	Protein Coding	54	GC16M088643	31.9599	https://www.genecards.org/cgi-bin/carddisp.pl?gene=CYBA
CROHN'S DISEASE	SOD1	Superoxide Dismutase 1	Protein Coding	60	GC21P031659	31.9583	https://www.genecards.org/cgi-bin/carddisp.pl?gene=SOD1
CROHN'S DISEASE	GDNF	Glial Cell Derived Neurotrophic Factor	Protein Coding	56	GC05M037812	31.8765	https://www.genecards.org/cgi-bin/carddisp.pl?gene=GDNF
CROHN'S DISEASE	IRGM	Immunity Related GTPase M	Protein Coding	42	GC05P150846	31.8466	https://www.genecards.org/cgi-bin/carddisp.pl?gene=IRGM
CROHN'S DISEASE	NCF2	Neutrophil Cytosolic Factor 2	Protein Coding	54	GC01M184057	31.7274	https://www.genecards.org/cgi-bin/carddisp.pl?gene=NCF2
CROHN'S DISEASE	MTHFR	Methylenetetrahydrofolate Reductase	Protein Coding	54	GC01M011785	31.4897	https://www.genecards.org/cgi-bin/carddisp.pl?gene=MTHFR
CROHN'S DISEASE	FBN1	Fibrillin 1	Protein Coding	53	GC15M048408	31.204	https://www.genecards.org/cgi-bin/carddisp.pl?gene=FBN1
CROHN'S DISEASE	NOTCH1	Notch Receptor 1	Protein Coding	60	GC09M137729	31.1639	https://www.genecards.org/cgi-bin/carddisp.pl?gene=NOTCH1
CROHN'S DISEASE	HLA-DQA1	Major Histocompatibility Complex, Class II, DQ Alpha 1	Protein Coding	48	GC06P092182	31.0348	https://www.genecards.org/cgi-bin/carddisp.pl?gene=HLA-DQA1
CROHN'S DISEASE	VEGFA	Vascular Endothelial Growth Factor A	Protein Coding	56	GC06P043770	30.9168	https://www.genecards.org/cgi-bin/carddisp.pl?gene=VEGFA
CROHN'S DISEASE	JAK2	Janus Kinase 2	Protein Coding	60	GC09P004985	30.8974	https://www.genecards.org/cgi-bin/carddisp.pl?gene=JAK2
CROHN'S DISEASE	INS	Insulin	Protein Coding	55	GC11M002159	30.877	https://www.genecards.org/cgi-bin/carddisp.pl?gene=INS
CROHN'S DISEASE	EGFR	Epidermal Growth Factor Receptor	Protein Coding	62	GC07P055019	30.8503	https://www.genecards.org/cgi-bin/carddisp.pl?gene=EGFR
CROHN'S DISEASE	HSPB1	Heat Shock Protein Family B (Small) Member 1	Protein Coding	59	GC07P076302	30.8073	https://www.genecards.org/cgi-bin/carddisp.pl?gene=HSPB1
CROHN'S DISEASE	MIR146A	MicroRNA 146a	RNA Gene	25	GC05P160485	30.7115	https://www.genecards.org/cgi-bin/carddisp.pl?gene=MIR146A
CROHN'S DISEASE	FAS	Fas Cell Surface Death Receptor	Protein Coding	57	GC10P094616	30.6502	https://www.genecards.org/cgi-bin/carddisp.pl?gene=FAS
CROHN'S DISEASE	F9	Coagulation Factor IX	Protein Coding	54	GC0XP139530	30.6131	https://www.genecards.org/cgi-bin/carddisp.pl?gene=F9
CROHN'S DISEASE	JAG1	Jagged Canonical Notch Ligand 1	Protein Coding	58	GC20M010637	30.6109	https://www.genecards.org/cgi-bin/carddisp.pl?gene=JAG1
CROHN'S DISEASE	F2	Coagulation Factor II, Thrombin	Protein Coding	56	GC11P046720	30.5916	https://www.genecards.org/cgi-bin/carddisp.pl?gene=F2
CROHN'S DISEASE	CTNNB1	Catenin Beta 1	Protein Coding	60	GC03P041194	30.4603	https://www.genecards.org/cgi-bin/carddisp.pl?gene=CTNNB1
CROHN'S DISEASE	IL18	Interleukin 18	Protein Coding	50	GC11M112143	30.3979	https://www.genecards.org/cgi-bin/carddisp.pl?gene=IL18
CROHN'S DISEASE	INAVA	Innate Immunity Activator	Protein Coding	40	GC01P200892	30.3943	https://www.genecards.org/cgi-bin/carddisp.pl?gene=INAVA
CROHN'S DISEASE	ADAM17	ADAM Metallopeptidase Domain 17	Protein Coding	58	GC02M009488	30.2869	https://www.genecards.org/cgi-bin/carddisp.pl?gene=ADAM17
CROHN'S DISEASE	PPARG	Peroxisome Proliferator Activated Receptor Gamma	Protein Coding	60	GC03P012287	30.1793	https://www.genecards.org/cgi-bin/carddisp.pl?gene=PPARG
CROHN'S DISEASE	UMOD	Uromodulin	Protein Coding	49	GC16M020344	30.1328	https://www.genecards.org/cgi-bin/carddisp.pl?gene=UMOD
CROHN'S DISEASE	MUC1	Mucin 1, Cell Surface Associated	Protein Coding	55	GC01M155185	30.1041	https://www.genecards.org/cgi-bin/carddisp.pl?gene=MUC1
CROHN'S DISEASE	NDRG1	N-Myc Downstream Regulated 1	Protein Coding	52	GC08M133237	29.9892	https://www.genecards.org/cgi-bin/carddisp.pl?gene=NDRG1
CROHN'S DISEASE	ERBB2	Erb-B2 Receptor Tyrosine Kinase 2	Protein Coding	62	GC17P039687	29.9347	https://www.genecards.org/cgi-bin/carddisp.pl?gene=ERBB2
CROHN'S DISEASE	MME	Membrane Metalloendopeptidase	Protein Coding	57	GC03P155024	29.9187	https://www.genecards.org/cgi-bin/carddisp.pl?gene=MME
CROHN'S DISEASE	PTEN	Phosphatase And Tensin Homolog	Protein Coding	59	GC10P094594	29.767	https://www.genecards.org/cgi-bin/carddisp.pl?gene=PTEN
CROHN'S DISEASE	CLN3	CLN3 Lysosomal/Endosomal Transmembrane Protein, Battenin	Protein Coding	50	GC16M028466	29.5181	https://www.genecards.org/cgi-bin/carddisp.pl?gene=CLN3
CROHN'S DISEASE	TTR	Transthyretin	Protein Coding	55	GC18P031557	29.1625	https://www.genecards.org/cgi-bin/carddisp.pl?gene=TTR
CROHN'S DISEASE	LITAF	Lipopolysaccharide Induced TNF Factor	Protein Coding	50	GC16M011547	29.1156	https://www.genecards.org/cgi-bin/carddisp.pl?gene=LITAF
CROHN'S DISEASE	ABCB1	ATP Binding Cassette Subfamily B Member 1	Protein Coding	57	GC07M087504	29.0997	https://www.genecards.org/cgi-bin/carddisp.pl?gene=ABCB1
CROHN'S DISEASE	CD4	CD4 Molecule	Protein Coding	57	GC12P006786	28.9548	https://www.genecards.org/cgi-bin/carddisp.pl?gene=CD4
CROHN'S DISEASE	ICAM1	Intercellular Adhesion Molecule 1	Protein Coding	57	GC19P010749	28.8923	https://www.genecards.org/cgi-bin/carddisp.pl?gene=ICAM1
CROHN'S DISEASE	MIR126	MicroRNA 126	RNA Gene	25	GC09P136670	28.8841	https://www.genecards.org/cgi-bin/carddisp.pl?gene=MIR126
CROHN'S DISEASE	MIR34A	MicroRNA 34a	RNA Gene	25	GC01M009154	28.8476	https://www.genecards.org/cgi-bin/carddisp.pl?gene=MIR34A
CROHN'S DISEASE	PIK3CA	Phosphatidylinositol-4,5-Bisphosphate 3-Kinase Catalytic Subunit Alpha	Protein Coding	59	GC03P179148	28.8036	https://www.genecards.org/cgi-bin/carddisp.pl?gene=PIK3CA
CROHN'S DISEASE	TNFRSF11B	TNF Receptor Superfamily Member 11b	Protein Coding	54	GC08M118923	28.723	https://www.genecards.org/cgi-bin/carddisp.pl?gene=TNFRSF11B
CROHN'S DISEASE	SLC22A4	Solute Carrier Family 22 Member 4	Protein Coding	52	GC05P132294	28.716	https://www.genecards.org/cgi-bin/carddisp.pl?gene=SLC22A4
CROHN'S DISEASE	SERPINA3	Serpin Family A Member 3	Protein Coding	50	GC14P094612	28.7123	https://www.genecards.org/cgi-bin/carddisp.pl?gene=SERPINA3
CROHN'S DISEASE	CFH	Complement Factor H	Protein Coding	54	GC01P196621	28.705	https://www.genecards.org/cgi-bin/carddisp.pl?gene=CFH
CROHN'S DISEASE	PON1	Paraoxonase 1	Protein Coding	55	GC07M095297	28.6752	https://www.genecards.org/cgi-bin/carddisp.pl?gene=PON1
CROHN'S DISEASE	IL13	Interleukin 13	Protein Coding	50	GC05P132656	28.6154	https://www.genecards.org/cgi-bin/carddisp.pl?gene=IL13
CROHN'S DISEASE	UCHL1	Ubiquitin C-Terminal Hydrolase L1	Protein Coding	59	GC04P041256	28.5105	https://www.genecards.org/cgi-bin/carddisp.pl?gene=UCHL1
CROHN'S DISEASE	KRAS	KRAS Proto-Oncogene, GTPase	Protein Coding	59	GC12M025204	28.345	https://www.genecards.org/cgi-bin/carddisp.pl?gene=KRAS
CROHN'S DISEASE	IL1RN	Interleukin 1 Receptor Antagonist	Protein Coding	57	GC02P123802	28.2095	https://www.genecards.org/cgi-bin/carddisp.pl?gene=IL1RN
CROHN'S DISEASE	COL4A1	Collagen Type IV Alpha 1 Chain	Protein Coding	55	GC13M110148	28.1811	https://www.genecards.org/cgi-bin/carddisp.pl?gene=COL4A1
CROHN'S DISEASE	TTN	Titin	Protein Coding	54	GC02M178525	28.1778	https://www.genecards.org/cgi-bin/carddisp.pl?gene=TTN
CROHN'S DISEASE	BRAF	B-Raf Proto-Oncogene, Serine/Threonine Kinase	Protein Coding	60	GC07M140742	28.1561	https://www.genecards.org/cgi-bin/carddisp.pl?gene=BRAF
CROHN'S DISEASE	AR	Androgen Receptor	Protein Coding	59	GC0XP067544	28.0888	https://www.genecards.org/cgi-bin/carddisp.pl?gene=AR
CROHN'S DISEASE	SLC11A1	Solute Carrier Family 11 Member 1	Protein Coding	53	GC02P218382	27.9208	https://www.genecards.org/cgi-bin/carddisp.pl?gene=SLC11A1
CROHN'S DISEASE	AKT1	AKT Serine/Threonine Kinase 1	Protein Coding	61	GC14M104769	27.7773	https://www.genecards.org/cgi-bin/carddisp.pl?gene=AKT1
CROHN'S DISEASE	ENG	Endoglin	Protein Coding	55	GC09M127815	27.7659	https://www.genecards.org/cgi-bin/carddisp.pl?gene=ENG
CROHN'S DISEASE	MMP9	Matrix Metallopeptidase 9	Protein Coding	61	GC20P046008	27.4531	https://www.genecards.org/cgi-bin/carddisp.pl?gene=MMP9
CROHN'S DISEASE	FGFR3	Fibroblast Growth Factor Receptor 3	Protein Coding	63	GC04P001795	27.4525	https://www.genecards.org/cgi-bin/carddisp.pl?gene=FGFR3
CROHN'S DISEASE	APC	APC Regulator Of WNT Signaling Pathway	Protein Coding	56	GC05P112707	27.3434	https://www.genecards.org/cgi-bin/carddisp.pl?gene=APC
CROHN'S DISEASE	NCF4	Neutrophil Cytosolic Factor 4	Protein Coding	54	GC22P036860	27.2766	https://www.genecards.org/cgi-bin/carddisp.pl?gene=NCF4
CROHN'S DISEASE	TLR5	Toll Like Receptor 5	Protein Coding	53	GC01M223109	27.2061	https://www.genecards.org/cgi-bin/carddisp.pl?gene=TLR5
CROHN'S DISEASE	APOB	Apolipoprotein B	Protein Coding	53	GC02M020956	27.1065	https://www.genecards.org/cgi-bin/carddisp.pl?gene=APOB
CROHN'S DISEASE	TNFRSF11A	TNF Receptor Superfamily Member 11a	Protein Coding	54	GC18P062325	27.0433	https://www.genecards.org/cgi-bin/carddisp.pl?gene=TNFRSF11A
CROHN'S DISEASE	COL1A2	Collagen Type I Alpha 2 Chain	Protein Coding	54	GC07P094394	26.8803	https://www.genecards.org/cgi-bin/carddisp.pl?gene=COL1A2
CROHN'S DISEASE	MIR155	MicroRNA 155	RNA Gene	23	GC21P025573	26.8716	https://www.genecards.org/cgi-bin/carddisp.pl?gene=MIR155
CROHN'S DISEASE	LAMP2	Lysosomal Associated Membrane Protein 2	Protein Coding	51	GC0XM120426	26.8524	https://www.genecards.org/cgi-bin/carddisp.pl?gene=LAMP2
CROHN'S DISEASE	MIR17	MicroRNA 17	RNA Gene	22	GC13P091350	26.5937	https://www.genecards.org/cgi-bin/carddisp.pl?gene=MIR17
CROHN'S DISEASE	IL10RB	Interleukin 10 Receptor Subunit Beta	Protein Coding	51	GC21P033266	26.4646	https://www.genecards.org/cgi-bin/carddisp.pl?gene=IL10RB
CROHN'S DISEASE	ATM	ATM Serine/Threonine Kinase	Protein Coding	60	GC11P108222	26.435	https://www.genecards.org/cgi-bin/carddisp.pl?gene=ATM
CROHN'S DISEASE	ACTA2	Actin Alpha 2, Smooth Muscle	Protein Coding	53	GC10M088935	26.3873	https://www.genecards.org/cgi-bin/carddisp.pl?gene=ACTA2
CROHN'S DISEASE	CD36	CD36 Molecule	Protein Coding	56	GC07P080369	26.3653	https://www.genecards.org/cgi-bin/carddisp.pl?gene=CD36
CROHN'S DISEASE	MIR145	MicroRNA 145	RNA Gene	26	GC05P149430	26.3487	https://www.genecards.org/cgi-bin/carddisp.pl?gene=MIR145
CROHN'S DISEASE	IBD5	Inflammatory Bowel Disease 5	Genetic Locus	5	GC05U990104	26.2733	https://www.genecards.org/cgi-bin/carddisp.pl?gene=IBD5
CROHN'S DISEASE	SMAD4	SMAD Family Member 4	Protein Coding	59	GC18P051028	26.268	https://www.genecards.org/cgi-bin/carddisp.pl?gene=SMAD4
CROHN'S DISEASE	DSP	Desmoplakin	Protein Coding	57	GC06P007541	25.9621	https://www.genecards.org/cgi-bin/carddisp.pl?gene=DSP
CROHN'S DISEASE	ATXN2	Ataxin 2	Protein Coding	50	GC12M111443	25.9243	https://www.genecards.org/cgi-bin/carddisp.pl?gene=ATXN2
CROHN'S DISEASE	SLC22A5	Solute Carrier Family 22 Member 5	Protein Coding	53	GC05P132369	25.888	https://www.genecards.org/cgi-bin/carddisp.pl?gene=SLC22A5
CROHN'S DISEASE	CDH1	Cadherin 1	Protein Coding	56	GC16P068737	25.5754	https://www.genecards.org/cgi-bin/carddisp.pl?gene=CDH1
CROHN'S DISEASE	FOXP3	Forkhead Box P3	Protein Coding	53	GC0XM049250	25.5113	https://www.genecards.org/cgi-bin/carddisp.pl?gene=FOXP3
CROHN'S DISEASE	PROM1	Prominin 1	Protein Coding	53	GC04M015965	25.4431	https://www.genecards.org/cgi-bin/carddisp.pl?gene=PROM1
CROHN'S DISEASE	STAT1	Signal Transducer And Activator Of Transcription 1	Protein Coding	60	GC02M190908	25.4098	https://www.genecards.org/cgi-bin/carddisp.pl?gene=STAT1
CROHN'S DISEASE	IL2RA	Interleukin 2 Receptor Subunit Alpha	Protein Coding	57	GC10M006010	25.365	https://www.genecards.org/cgi-bin/carddisp.pl?gene=IL2RA
CROHN'S DISEASE	BDNF	Brain Derived Neurotrophic Factor	Protein Coding	56	GC11M027654	25.3264	https://www.genecards.org/cgi-bin/carddisp.pl?gene=BDNF
CROHN'S DISEASE	ICOSLG	Inducible T Cell Costimulator Ligand	Protein Coding	48	GC21M044222	25.3124	https://www.genecards.org/cgi-bin/carddisp.pl?gene=ICOSLG
CROHN'S DISEASE	IRF5	Interferon Regulatory Factor 5	Protein Coding	53	GC07P128937	25.2545	https://www.genecards.org/cgi-bin/carddisp.pl?gene=IRF5
CROHN'S DISEASE	MMP1	Matrix Metallopeptidase 1	Protein Coding	57	GC11M102810	25.2518	https://www.genecards.org/cgi-bin/carddisp.pl?gene=MMP1
CROHN'S DISEASE	IL12B	Interleukin 12B	Protein Coding	51	GC05M159314	25.1955	https://www.genecards.org/cgi-bin/carddisp.pl?gene=IL12B
CROHN'S DISEASE	FCGR2A	Fc Gamma Receptor IIa	Protein Coding	55	GC01P161505	25.1292	https://www.genecards.org/cgi-bin/carddisp.pl?gene=FCGR2A
CROHN'S DISEASE	BRCA2	BRCA2 DNA Repair Associated	Protein Coding	53	GC13P032315	25.0714	https://www.genecards.org/cgi-bin/carddisp.pl?gene=BRCA2
CROHN'S DISEASE	IL1A	Interleukin 1 Alpha	Protein Coding	52	GC02M112773	24.8795	https://www.genecards.org/cgi-bin/carddisp.pl?gene=IL1A
CROHN'S DISEASE	PFKM	Phosphofructokinase, Muscle	Protein Coding	56	GC12P048105	24.8688	https://www.genecards.org/cgi-bin/carddisp.pl?gene=PFKM
CROHN'S DISEASE	PLAU	Plasminogen Activator, Urokinase	Protein Coding	59	GC10P073909	24.7763	https://www.genecards.org/cgi-bin/carddisp.pl?gene=PLAU
CROHN'S DISEASE	HMOX1	Heme Oxygenase 1	Protein Coding	59	GC22P035380	24.7435	https://www.genecards.org/cgi-bin/carddisp.pl?gene=HMOX1
CROHN'S DISEASE	MAPK1	Mitogen-Activated Protein Kinase 1	Protein Coding	59	GC22M021759	24.6884	https://www.genecards.org/cgi-bin/carddisp.pl?gene=MAPK1
CROHN'S DISEASE	PLA2G6	Phospholipase A2 Group VI	Protein Coding	54	GC22M063106	24.6884	https://www.genecards.org/cgi-bin/carddisp.pl?gene=PLA2G6
CROHN'S DISEASE	VDR	Vitamin D Receptor	Protein Coding	56	GC12M047841	24.6051	https://www.genecards.org/cgi-bin/carddisp.pl?gene=VDR
CROHN'S DISEASE	MIR143	MicroRNA 143	RNA Gene	26	GC05P149414	24.5368	https://www.genecards.org/cgi-bin/carddisp.pl?gene=MIR143
CROHN'S DISEASE	REN	Renin	Protein Coding	55	GC01M204154	24.4798	https://www.genecards.org/cgi-bin/carddisp.pl?gene=REN
CROHN'S DISEASE	IL5	Interleukin 5	Protein Coding	52	GC05M132541	24.4649	https://www.genecards.org/cgi-bin/carddisp.pl?gene=IL5
CROHN'S DISEASE	NR4A2	Nuclear Receptor Subfamily 4 Group A Member 2	Protein Coding	53	GC02M156324	24.4644	https://www.genecards.org/cgi-bin/carddisp.pl?gene=NR4A2
CROHN'S DISEASE	F5	Coagulation Factor V	Protein Coding	53	GC01M169511	24.4444	https://www.genecards.org/cgi-bin/carddisp.pl?gene=F5
CROHN'S DISEASE	SMAD3	SMAD Family Member 3	Protein Coding	59	GC15P067063	24.4325	https://www.genecards.org/cgi-bin/carddisp.pl?gene=SMAD3
CROHN'S DISEASE	CCR5	C-C Motif Chemokine Receptor 5	Protein Coding	53	GC03P047615	24.3968	https://www.genecards.org/cgi-bin/carddisp.pl?gene=CCR5
CROHN'S DISEASE	HLA-A	Major Histocompatibility Complex, Class I, A	Protein Coding	52	GC06P092113	24.3782	https://www.genecards.org/cgi-bin/carddisp.pl?gene=HLA-A
CROHN'S DISEASE	BEST1	Bestrophin 1	Protein Coding	50	GC11P061949	24.3084	https://www.genecards.org/cgi-bin/carddisp.pl?gene=BEST1
CROHN'S DISEASE	MIR29A	MicroRNA 29a	RNA Gene	24	GC07M130876	24.1529	https://www.genecards.org/cgi-bin/carddisp.pl?gene=MIR29A
CROHN'S DISEASE	CRB1	Crumbs Cell Polarity Complex Component 1	Protein Coding	51	GC01P197202	24.03	https://www.genecards.org/cgi-bin/carddisp.pl?gene=CRB1
CROHN'S DISEASE	GUCY2D	Guanylate Cyclase 2D, Retinal	Protein Coding	52	GC17P008002	23.9828	https://www.genecards.org/cgi-bin/carddisp.pl?gene=GUCY2D
CROHN'S DISEASE	LCAT	Lecithin-Cholesterol Acyltransferase	Protein Coding	54	GC16M067939	23.9203	https://www.genecards.org/cgi-bin/carddisp.pl?gene=LCAT
CROHN'S DISEASE	MMP3	Matrix Metallopeptidase 3	Protein Coding	57	GC11M102835	23.892	https://www.genecards.org/cgi-bin/carddisp.pl?gene=MMP3
CROHN'S DISEASE	AGT	Angiotensinogen	Protein Coding	56	GC01M230690	23.8587	https://www.genecards.org/cgi-bin/carddisp.pl?gene=AGT
CROHN'S DISEASE	HP	Haptoglobin	Protein Coding	52	GC16P072372	23.8502	https://www.genecards.org/cgi-bin/carddisp.pl?gene=HP
CROHN'S DISEASE	GATA3	GATA Binding Protein 3	Protein Coding	56	GC10P008045	23.7465	https://www.genecards.org/cgi-bin/carddisp.pl?gene=GATA3
CROHN'S DISEASE	CD40	CD40 Molecule	Protein Coding	57	GC20P046118	23.7396	https://www.genecards.org/cgi-bin/carddisp.pl?gene=CD40
CROHN'S DISEASE	PSTPIP1	Proline-Serine-Threonine Phosphatase Interacting Protein 1	Protein Coding	50	GC15P076993	23.6899	https://www.genecards.org/cgi-bin/carddisp.pl?gene=PSTPIP1
CROHN'S DISEASE	NFKB1	Nuclear Factor Kappa B Subunit 1	Protein Coding	60	GC04P102501	23.6537	https://www.genecards.org/cgi-bin/carddisp.pl?gene=NFKB1
CROHN'S DISEASE	ESR1	Estrogen Receptor 1	Protein Coding	61	GC06P151656	23.5938	https://www.genecards.org/cgi-bin/carddisp.pl?gene=ESR1
CROHN'S DISEASE	IL21	Interleukin 21	Protein Coding	51	GC04M122612	23.5734	https://www.genecards.org/cgi-bin/carddisp.pl?gene=IL21
CROHN'S DISEASE	SP140	SP140 Nuclear Body Protein	Protein Coding	43	GC02P230203	23.5021	https://www.genecards.org/cgi-bin/carddisp.pl?gene=SP140
CROHN'S DISEASE	MYO5B	Myosin VB	Protein Coding	50	GC18M049822	23.4871	https://www.genecards.org/cgi-bin/carddisp.pl?gene=MYO5B
CROHN'S DISEASE	XIAP	X-Linked Inhibitor Of Apoptosis	Protein Coding	59	GC0XP123859	23.4764	https://www.genecards.org/cgi-bin/carddisp.pl?gene=XIAP
CROHN'S DISEASE	HNRNPA1	Heterogeneous Nuclear Ribonucleoprotein A1	Protein Coding	55	GC12P054280	23.4756	https://www.genecards.org/cgi-bin/carddisp.pl?gene=HNRNPA1
CROHN'S DISEASE	SAG	S-Antigen Visual Arrestin	Protein Coding	51	GC02P233400	23.4598	https://www.genecards.org/cgi-bin/carddisp.pl?gene=SAG
CROHN'S DISEASE	GATA4	GATA Binding Protein 4	Protein Coding	55	GC08P011676	23.4003	https://www.genecards.org/cgi-bin/carddisp.pl?gene=GATA4
CROHN'S DISEASE	TNFSF15	TNF Superfamily Member 15	Protein Coding	51	GC09M114784	23.3956	https://www.genecards.org/cgi-bin/carddisp.pl?gene=TNFSF15
CROHN'S DISEASE	GRN	Granulin Precursor	Protein Coding	55	GC17P044345	23.3955	https://www.genecards.org/cgi-bin/carddisp.pl?gene=GRN
CROHN'S DISEASE	TGFBR2	Transforming Growth Factor Beta Receptor 2	Protein Coding	59	GC03P030623	23.3659	https://www.genecards.org/cgi-bin/carddisp.pl?gene=TGFBR2
CROHN'S DISEASE	CCND1	Cyclin D1	Protein Coding	60	GC11P069641	23.2856	https://www.genecards.org/cgi-bin/carddisp.pl?gene=CCND1
CROHN'S DISEASE	RIPK1	Receptor Interacting Serine/Threonine Kinase 1	Protein Coding	56	GC06P003333	23.2575	https://www.genecards.org/cgi-bin/carddisp.pl?gene=RIPK1
CROHN'S DISEASE	NRAS	NRAS Proto-Oncogene, GTPase	Protein Coding	57	GC01M114704	23.2345	https://www.genecards.org/cgi-bin/carddisp.pl?gene=NRAS
CROHN'S DISEASE	KIT	KIT Proto-Oncogene, Receptor Tyrosine Kinase	Protein Coding	60	GC04P054657	23.2342	https://www.genecards.org/cgi-bin/carddisp.pl?gene=KIT
CROHN'S DISEASE	BRCA1	BRCA1 DNA Repair Associated	Protein Coding	56	GC17M043044	23.2309	https://www.genecards.org/cgi-bin/carddisp.pl?gene=BRCA1
CROHN'S DISEASE	IGF1	Insulin Like Growth Factor 1	Protein Coding	55	GC12M102395	23.205	https://www.genecards.org/cgi-bin/carddisp.pl?gene=IGF1
CROHN'S DISEASE	MIF	Macrophage Migration Inhibitory Factor	Protein Coding	55	GC22P023894	23.1911	https://www.genecards.org/cgi-bin/carddisp.pl?gene=MIF
CROHN'S DISEASE	NOS2	Nitric Oxide Synthase 2	Protein Coding	56	GC17M027756	23.1423	https://www.genecards.org/cgi-bin/carddisp.pl?gene=NOS2
CROHN'S DISEASE	TG	Thyroglobulin	Protein Coding	51	GC08P132866	22.9836	https://www.genecards.org/cgi-bin/carddisp.pl?gene=TG
CROHN'S DISEASE	CARD9	Caspase Recruitment Domain Family Member 9	Protein Coding	51	GC09M136364	22.8943	https://www.genecards.org/cgi-bin/carddisp.pl?gene=CARD9
CROHN'S DISEASE	SERPINE1	Serpin Family E Member 1	Protein Coding	57	GC07P101127	22.8858	https://www.genecards.org/cgi-bin/carddisp.pl?gene=SERPINE1
CROHN'S DISEASE	STAT4	Signal Transducer And Activator Of Transcription 4	Protein Coding	53	GC02M191029	22.8722	https://www.genecards.org/cgi-bin/carddisp.pl?gene=STAT4
CROHN'S DISEASE	CD40LG	CD40 Ligand	Protein Coding	57	GC0XP136649	22.8614	https://www.genecards.org/cgi-bin/carddisp.pl?gene=CD40LG
CROHN'S DISEASE	MBL2	Mannose Binding Lectin 2	Protein Coding	53	GC10M052760	22.8605	https://www.genecards.org/cgi-bin/carddisp.pl?gene=MBL2
CROHN'S DISEASE	CCL5	C-C Motif Chemokine Ligand 5	Protein Coding	51	GC17M035871	22.7746	https://www.genecards.org/cgi-bin/carddisp.pl?gene=CCL5
CROHN'S DISEASE	H2AC18	H2A Clustered Histone 18	Protein Coding	35	GC01M152688	22.3868	https://www.genecards.org/cgi-bin/carddisp.pl?gene=H2AC18
CROHN'S DISEASE	SYK	Spleen Associated Tyrosine Kinase	Protein Coding	56	GC09P092704	22.3282	https://www.genecards.org/cgi-bin/carddisp.pl?gene=SYK
CROHN'S DISEASE	MIR140	MicroRNA 140	RNA Gene	26	GC16P069934	22.326	https://www.genecards.org/cgi-bin/carddisp.pl?gene=MIR140
CROHN'S DISEASE	CTSD	Cathepsin D	Protein Coding	59	GC11M001752	22.3013	https://www.genecards.org/cgi-bin/carddisp.pl?gene=CTSD
CROHN'S DISEASE	MIR29B1	MicroRNA 29b-1	RNA Gene	23	GC07M130877	22.2545	https://www.genecards.org/cgi-bin/carddisp.pl?gene=MIR29B1
CROHN'S DISEASE	TNFRSF1B	TNF Receptor Superfamily Member 1B	Protein Coding	56	GC01P012301	22.1285	https://www.genecards.org/cgi-bin/carddisp.pl?gene=TNFRSF1B
CROHN'S DISEASE	FN1	Fibronectin 1	Protein Coding	57	GC02M215360	22.0262	https://www.genecards.org/cgi-bin/carddisp.pl?gene=FN1
CROHN'S DISEASE	VPS13C	Vacuolar Protein Sorting 13 Homolog C	Protein Coding	40	GC15M061852	21.987	https://www.genecards.org/cgi-bin/carddisp.pl?gene=VPS13C
CROHN'S DISEASE	MIR15A	MicroRNA 15a	RNA Gene	18	GC13M050049	21.9808	https://www.genecards.org/cgi-bin/carddisp.pl?gene=MIR15A
CROHN'S DISEASE	ITCH	Itchy E3 Ubiquitin Protein Ligase	Protein Coding	53	GC20P034363	21.9734	https://www.genecards.org/cgi-bin/carddisp.pl?gene=ITCH
CROHN'S DISEASE	SURF1	SURF1 Cytochrome C Oxidase Assembly Factor	Protein Coding	48	GC09M133351	21.962	https://www.genecards.org/cgi-bin/carddisp.pl?gene=SURF1
CROHN'S DISEASE	GIGYF2	GRB10 Interacting GYF Protein 2	Protein Coding	47	GC02P232698	21.9277	https://www.genecards.org/cgi-bin/carddisp.pl?gene=GIGYF2
CROHN'S DISEASE	MAP2K1	Mitogen-Activated Protein Kinase Kinase 1	Protein Coding	60	GC15P066386	21.8793	https://www.genecards.org/cgi-bin/carddisp.pl?gene=MAP2K1
CROHN'S DISEASE	MT-ND5	Mitochondrially Encoded NADH:Ubiquinone Oxidoreductase Core Subunit 5	Protein Coding	39	GCMTP012339	21.8643	https://www.genecards.org/cgi-bin/carddisp.pl?gene=MT-ND5
CROHN'S DISEASE	COPA	COPI Coat Complex Subunit Alpha	Protein Coding	49	GC01M160288	21.7856	https://www.genecards.org/cgi-bin/carddisp.pl?gene=COPA
CROHN'S DISEASE	MIR210	MicroRNA 210	RNA Gene	23	GC11M004426	21.7422	https://www.genecards.org/cgi-bin/carddisp.pl?gene=MIR210
CROHN'S DISEASE	CARD8	Caspase Recruitment Domain Family Member 8	Protein Coding	46	GC19M070832	21.7378	https://www.genecards.org/cgi-bin/carddisp.pl?gene=CARD8
CROHN'S DISEASE	FASLG	Fas Ligand	Protein Coding	55	GC01P172628	21.726	https://www.genecards.org/cgi-bin/carddisp.pl?gene=FASLG
CROHN'S DISEASE	S100A9	S100 Calcium Binding Protein A9	Protein Coding	50	GC01P153357	21.722	https://www.genecards.org/cgi-bin/carddisp.pl?gene=S100A9
CROHN'S DISEASE	NLRP1	NLR Family Pyrin Domain Containing 1	Protein Coding	50	GC17M005499	21.7136	https://www.genecards.org/cgi-bin/carddisp.pl?gene=NLRP1
CROHN'S DISEASE	LEP	Leptin	Protein Coding	53	GC07P128241	21.6278	https://www.genecards.org/cgi-bin/carddisp.pl?gene=LEP
CROHN'S DISEASE	MIR106B	MicroRNA 106b	RNA Gene	24	GC07M102261	21.4993	https://www.genecards.org/cgi-bin/carddisp.pl?gene=MIR106B
CROHN'S DISEASE	ITGAM	Integrin Subunit Alpha M	Protein Coding	55	GC16P042850	21.4955	https://www.genecards.org/cgi-bin/carddisp.pl?gene=ITGAM
CROHN'S DISEASE	ABL1	ABL Proto-Oncogene 1, Non-Receptor Tyrosine Kinase	Protein Coding	59	GC09P130713	21.4775	https://www.genecards.org/cgi-bin/carddisp.pl?gene=ABL1
CROHN'S DISEASE	MMP2	Matrix Metallopeptidase 2	Protein Coding	60	GC16P055390	21.4509	https://www.genecards.org/cgi-bin/carddisp.pl?gene=MMP2
CROHN'S DISEASE	HRAS	HRas Proto-Oncogene, GTPase	Protein Coding	59	GC11M004421	21.4122	https://www.genecards.org/cgi-bin/carddisp.pl?gene=HRAS
CROHN'S DISEASE	CDKN2A	Cyclin Dependent Kinase Inhibitor 2A	Protein Coding	57	GC09M021967	21.3649	https://www.genecards.org/cgi-bin/carddisp.pl?gene=CDKN2A
CROHN'S DISEASE	CASR	Calcium Sensing Receptor	Protein Coding	57	GC03P122183	21.3379	https://www.genecards.org/cgi-bin/carddisp.pl?gene=CASR
CROHN'S DISEASE	OCRL	OCRL Inositol Polyphosphate-5-Phosphatase	Protein Coding	51	GC0XP129539	21.2178	https://www.genecards.org/cgi-bin/carddisp.pl?gene=OCRL
CROHN'S DISEASE	CAV3	Caveolin 3	Protein Coding	50	GC03P008733	21.1776	https://www.genecards.org/cgi-bin/carddisp.pl?gene=CAV3
CROHN'S DISEASE	COMT	Catechol-O-Methyltransferase	Protein Coding	59	GC22P019941	21.1658	https://www.genecards.org/cgi-bin/carddisp.pl?gene=COMT
CROHN'S DISEASE	SOX9	SRY-Box Transcription Factor 9	Protein Coding	52	GC17P072121	21.1507	https://www.genecards.org/cgi-bin/carddisp.pl?gene=SOX9
CROHN'S DISEASE	OPTN	Optineurin	Protein Coding	50	GC10P013099	21.1322	https://www.genecards.org/cgi-bin/carddisp.pl?gene=OPTN
CROHN'S DISEASE	CSF2	Colony Stimulating Factor 2	Protein Coding	51	GC05P132073	21.1318	https://www.genecards.org/cgi-bin/carddisp.pl?gene=CSF2
CROHN'S DISEASE	PRTN3	Proteinase 3	Protein Coding	52	GC19P000840	21.102	https://www.genecards.org/cgi-bin/carddisp.pl?gene=PRTN3
CROHN'S DISEASE	COL17A1	Collagen Type XVII Alpha 1 Chain	Protein Coding	51	GC10M104031	21.075	https://www.genecards.org/cgi-bin/carddisp.pl?gene=COL17A1
CROHN'S DISEASE	PHOX2B	Paired Like Homeobox 2B	Protein Coding	51	GC04M041746	21.0608	https://www.genecards.org/cgi-bin/carddisp.pl?gene=PHOX2B
CROHN'S DISEASE	DMD	Dystrophin	Protein Coding	52	GC0XM031097	21.0596	https://www.genecards.org/cgi-bin/carddisp.pl?gene=DMD
CROHN'S DISEASE	SERPINC1	Serpin Family C Member 1	Protein Coding	56	GC01M174653	21.0233	https://www.genecards.org/cgi-bin/carddisp.pl?gene=SERPINC1
CROHN'S DISEASE	MIR125A	MicroRNA 125a	RNA Gene	23	GC19P073357	21.0177	https://www.genecards.org/cgi-bin/carddisp.pl?gene=MIR125A
CROHN'S DISEASE	MIR144	MicroRNA 144	RNA Gene	21	GC17M051196	21.0076	https://www.genecards.org/cgi-bin/carddisp.pl?gene=MIR144
CROHN'S DISEASE	PTPN11	Protein Tyrosine Phosphatase Non-Receptor Type 11	Protein Coding	61	GC12P112418	21.0051	https://www.genecards.org/cgi-bin/carddisp.pl?gene=PTPN11
CROHN'S DISEASE	ALMS1	ALMS1 Centrosome And Basal Body Associated Protein	Protein Coding	48	GC02P073385	20.9918	https://www.genecards.org/cgi-bin/carddisp.pl?gene=ALMS1
CROHN'S DISEASE	TLR9	Toll Like Receptor 9	Protein Coding	53	GC03M052222	20.9812	https://www.genecards.org/cgi-bin/carddisp.pl?gene=TLR9
CROHN'S DISEASE	JUP	Junction Plakoglobin	Protein Coding	55	GC17M041754	20.9608	https://www.genecards.org/cgi-bin/carddisp.pl?gene=JUP
CROHN'S DISEASE	CYBC1	Cytochrome B-245 Chaperone 1	Protein Coding	41	GC17M082443	20.9123	https://www.genecards.org/cgi-bin/carddisp.pl?gene=CYBC1
CROHN'S DISEASE	PRKAR1A	Protein Kinase CAMP-Dependent Type I Regulatory Subunit Alpha	Protein Coding	57	GC17P069214	20.8972	https://www.genecards.org/cgi-bin/carddisp.pl?gene=PRKAR1A
CROHN'S DISEASE	DCTN1	Dynactin Subunit 1	Protein Coding	53	GC02M074361	20.8911	https://www.genecards.org/cgi-bin/carddisp.pl?gene=DCTN1
CROHN'S DISEASE	TBK1	TANK Binding Kinase 1	Protein Coding	56	GC12P064451	20.8206	https://www.genecards.org/cgi-bin/carddisp.pl?gene=TBK1
CROHN'S DISEASE	CD8A	CD8a Molecule	Protein Coding	54	GC02M086784	20.8067	https://www.genecards.org/cgi-bin/carddisp.pl?gene=CD8A
CROHN'S DISEASE	IBD21	Inflammatory Bowel Disease-21	Genetic Locus	2	GC18U900466	20.7884	https://www.genecards.org/cgi-bin/carddisp.pl?gene=IBD21
CROHN'S DISEASE	COL7A1	Collagen Type VII Alpha 1 Chain	Protein Coding	50	GC03M048564	20.788	https://www.genecards.org/cgi-bin/carddisp.pl?gene=COL7A1
CROHN'S DISEASE	ENPP1	Ectonucleotide Pyrophosphatase/Phosphodiesterase 1	Protein Coding	56	GC06P131808	20.7237	https://www.genecards.org/cgi-bin/carddisp.pl?gene=ENPP1
CROHN'S DISEASE	CP	Ceruloplasmin	Protein Coding	55	GC03M149162	20.7066	https://www.genecards.org/cgi-bin/carddisp.pl?gene=CP
CROHN'S DISEASE	ELANE	Elastase, Neutrophil Expressed	Protein Coding	58	GC19P003656	20.6766	https://www.genecards.org/cgi-bin/carddisp.pl?gene=ELANE
CROHN'S DISEASE	FGF23	Fibroblast Growth Factor 23	Protein Coding	52	GC12M004368	20.6721	https://www.genecards.org/cgi-bin/carddisp.pl?gene=FGF23
CROHN'S DISEASE	MIR122	MicroRNA 122	RNA Gene	25	GC18P058451	20.6575	https://www.genecards.org/cgi-bin/carddisp.pl?gene=MIR122
CROHN'S DISEASE	PTPRC	Protein Tyrosine Phosphatase Receptor Type C	Protein Coding	59	GC01P198607	20.6031	https://www.genecards.org/cgi-bin/carddisp.pl?gene=PTPRC
CROHN'S DISEASE	MT-CO1	Mitochondrially Encoded Cytochrome C Oxidase I	Protein Coding	38	GCMTP005906	20.603	https://www.genecards.org/cgi-bin/carddisp.pl?gene=MT-CO1
CROHN'S DISEASE	FGFR2	Fibroblast Growth Factor Receptor 2	Protein Coding	63	GC10M121478	20.5858	https://www.genecards.org/cgi-bin/carddisp.pl?gene=FGFR2
CROHN'S DISEASE	HARS1	Histidyl-TRNA Synthetase 1	Protein Coding	51	GC05M140673	20.535	https://www.genecards.org/cgi-bin/carddisp.pl?gene=HARS1
CROHN'S DISEASE	CD14	CD14 Molecule	Protein Coding	53	GC05M140631	20.5281	https://www.genecards.org/cgi-bin/carddisp.pl?gene=CD14
CROHN'S DISEASE	ATP2A1	ATPase Sarcoplasmic/Endoplasmic Reticulum Ca2+ Transporting 1	Protein Coding	55	GC16P042645	20.5259	https://www.genecards.org/cgi-bin/carddisp.pl?gene=ATP2A1
CROHN'S DISEASE	HLA-C	Major Histocompatibility Complex, Class I, C	Protein Coding	51	GC06M071681	20.5005	https://www.genecards.org/cgi-bin/carddisp.pl?gene=HLA-C
CROHN'S DISEASE	SBF1	SET Binding Factor 1	Protein Coding	48	GC22M061620	20.4989	https://www.genecards.org/cgi-bin/carddisp.pl?gene=SBF1
CROHN'S DISEASE	LTA	Lymphotoxin Alpha	Protein Coding	49	GC06P092152	20.4842	https://www.genecards.org/cgi-bin/carddisp.pl?gene=LTA
CROHN'S DISEASE	IFNGR1	Interferon Gamma Receptor 1	Protein Coding	57	GC06M137197	20.3591	https://www.genecards.org/cgi-bin/carddisp.pl?gene=IFNGR1
CROHN'S DISEASE	PTGS2	Prostaglandin-Endoperoxide Synthase 2	Protein Coding	56	GC01M186671	20.3566	https://www.genecards.org/cgi-bin/carddisp.pl?gene=PTGS2
CROHN'S DISEASE	FGFR1	Fibroblast Growth Factor Receptor 1	Protein Coding	63	GC08M038400	20.3364	https://www.genecards.org/cgi-bin/carddisp.pl?gene=FGFR1
CROHN'S DISEASE	IL37	Interleukin 37	Protein Coding	46	GC02P123799	20.3071	https://www.genecards.org/cgi-bin/carddisp.pl?gene=IL37
CROHN'S DISEASE	PDCD1	Programmed Cell Death 1	Protein Coding	55	GC02M241849	20.2975	https://www.genecards.org/cgi-bin/carddisp.pl?gene=PDCD1
CROHN'S DISEASE	GNAS	GNAS Complex Locus	Protein Coding	56	GC20P058839	20.2598	https://www.genecards.org/cgi-bin/carddisp.pl?gene=GNAS
CROHN'S DISEASE	ADIPOQ	Adiponectin, C1Q And Collagen Domain Containing	Protein Coding	52	GC03P186842	20.2538	https://www.genecards.org/cgi-bin/carddisp.pl?gene=ADIPOQ
CROHN'S DISEASE	TH	Tyrosine Hydroxylase	Protein Coding	57	GC11M002163	20.2427	https://www.genecards.org/cgi-bin/carddisp.pl?gene=TH
CROHN'S DISEASE	FLNA	Filamin A	Protein Coding	55	GC0XM154348	20.1869	https://www.genecards.org/cgi-bin/carddisp.pl?gene=FLNA
CROHN'S DISEASE	TGFB2	Transforming Growth Factor Beta 2	Protein Coding	58	GC01P218345	20.1798	https://www.genecards.org/cgi-bin/carddisp.pl?gene=TGFB2
CROHN'S DISEASE	MIR132	MicroRNA 132	RNA Gene	24	GC17M002049	20.1169	https://www.genecards.org/cgi-bin/carddisp.pl?gene=MIR132
CROHN'S DISEASE	C3	Complement C3	Protein Coding	56	GC19M006677	20.0998	https://www.genecards.org/cgi-bin/carddisp.pl?gene=C3
CROHN'S DISEASE	BCL2	BCL2 Apoptosis Regulator	Protein Coding	57	GC18M063123	20.0614	https://www.genecards.org/cgi-bin/carddisp.pl?gene=BCL2
CROHN'S DISEASE	FLG	Filaggrin	Protein Coding	47	GC01M152828	20.0404	https://www.genecards.org/cgi-bin/carddisp.pl?gene=FLG
CROHN'S DISEASE	IKBKG	Inhibitor Of Nuclear Factor Kappa B Kinase Regulatory Subunit Gamma	Protein Coding	55	GC0XP154541	20.0306	https://www.genecards.org/cgi-bin/carddisp.pl?gene=IKBKG
CROHN'S DISEASE	GM2A	Ganglioside GM2 Activator	Protein Coding	49	GC05P151212	19.9761	https://www.genecards.org/cgi-bin/carddisp.pl?gene=GM2A
CROHN'S DISEASE	MTOR	Mechanistic Target Of Rapamycin Kinase	Protein Coding	62	GC01M011106	19.9695	https://www.genecards.org/cgi-bin/carddisp.pl?gene=MTOR
CROHN'S DISEASE	B2M	Beta-2-Microglobulin	Protein Coding	56	GC15P044711	19.9274	https://www.genecards.org/cgi-bin/carddisp.pl?gene=B2M
CROHN'S DISEASE	NPHP4	Nephrocystin 4	Protein Coding	47	GC01M007583	19.8925	https://www.genecards.org/cgi-bin/carddisp.pl?gene=NPHP4
CROHN'S DISEASE	CCL11	C-C Motif Chemokine Ligand 11	Protein Coding	52	GC17P034285	19.8311	https://www.genecards.org/cgi-bin/carddisp.pl?gene=CCL11
CROHN'S DISEASE	COL4A3	Collagen Type IV Alpha 3 Chain	Protein Coding	53	GC02P227164	19.8253	https://www.genecards.org/cgi-bin/carddisp.pl?gene=COL4A3
CROHN'S DISEASE	TPMT	Thiopurine S-Methyltransferase	Protein Coding	53	GC06M018128	19.8187	https://www.genecards.org/cgi-bin/carddisp.pl?gene=TPMT
CROHN'S DISEASE	ITGA4	Integrin Subunit Alpha 4	Protein Coding	55	GC02P181456	19.8178	https://www.genecards.org/cgi-bin/carddisp.pl?gene=ITGA4
CROHN'S DISEASE	THBD	Thrombomodulin	Protein Coding	53	GC20M023026	19.8005	https://www.genecards.org/cgi-bin/carddisp.pl?gene=THBD
CROHN'S DISEASE	CX3CR1	C-X3-C Motif Chemokine Receptor 1	Protein Coding	50	GC03M039279	19.7988	https://www.genecards.org/cgi-bin/carddisp.pl?gene=CX3CR1
CROHN'S DISEASE	CHAT	Choline O-Acetyltransferase	Protein Coding	55	GC10P049609	19.7885	https://www.genecards.org/cgi-bin/carddisp.pl?gene=CHAT
CROHN'S DISEASE	KRT5	Keratin 5	Protein Coding	52	GC12M052514	19.7584	https://www.genecards.org/cgi-bin/carddisp.pl?gene=KRT5
CROHN'S DISEASE	TYR	Tyrosinase	Protein Coding	55	GC11P089177	19.7518	https://www.genecards.org/cgi-bin/carddisp.pl?gene=TYR
CROHN'S DISEASE	MT-CYB	Mitochondrially Encoded Cytochrome B	Protein Coding	38	GCMTP014749	19.7036	https://www.genecards.org/cgi-bin/carddisp.pl?gene=MT-CYB
CROHN'S DISEASE	INPP5E	Inositol Polyphosphate-5-Phosphatase E	Protein Coding	48	GC09M136428	19.663	https://www.genecards.org/cgi-bin/carddisp.pl?gene=INPP5E
CROHN'S DISEASE	IBD2	Inflammatory Bowel Disease 2	Genetic Locus	5	GC12U990041	19.6396	https://www.genecards.org/cgi-bin/carddisp.pl?gene=IBD2
CROHN'S DISEASE	IBD3	Inflammatory Bowel Disease 3	Genetic Locus	3	GC06U990223	19.63	https://www.genecards.org/cgi-bin/carddisp.pl?gene=IBD3
CROHN'S DISEASE	RHO	Rhodopsin	Protein Coding	55	GC03P134990	19.618	https://www.genecards.org/cgi-bin/carddisp.pl?gene=RHO
CROHN'S DISEASE	HLA-DPB1	Major Histocompatibility Complex, Class II, DP Beta 1	Protein Coding	51	GC06P092189	19.5391	https://www.genecards.org/cgi-bin/carddisp.pl?gene=HLA-DPB1
CROHN'S DISEASE	C4A	Complement C4A (Rodgers Blood Group)	Protein Coding	50	GC06P092175	19.5254	https://www.genecards.org/cgi-bin/carddisp.pl?gene=C4A
CROHN'S DISEASE	EPO	Erythropoietin	Protein Coding	49	GC07P100720	19.5101	https://www.genecards.org/cgi-bin/carddisp.pl?gene=EPO
CROHN'S DISEASE	TGFBR1	Transforming Growth Factor Beta Receptor 1	Protein Coding	61	GC09P099104	19.502	https://www.genecards.org/cgi-bin/carddisp.pl?gene=TGFBR1
CROHN'S DISEASE	SPP1	Secreted Phosphoprotein 1	Protein Coding	53	GC04P087975	19.4813	https://www.genecards.org/cgi-bin/carddisp.pl?gene=SPP1
CROHN'S DISEASE	HSPD1	Heat Shock Protein Family D (Hsp60) Member 1	Protein Coding	55	GC02M197486	19.4533	https://www.genecards.org/cgi-bin/carddisp.pl?gene=HSPD1
CROHN'S DISEASE	CD19	CD19 Molecule	Protein Coding	58	GC16P042650	19.4036	https://www.genecards.org/cgi-bin/carddisp.pl?gene=CD19
CROHN'S DISEASE	CST3	Cystatin C	Protein Coding	51	GC20M023686	19.3971	https://www.genecards.org/cgi-bin/carddisp.pl?gene=CST3
CROHN'S DISEASE	BBS1	Bardet-Biedl Syndrome 1	Protein Coding	44	GC11P070970	19.3875	https://www.genecards.org/cgi-bin/carddisp.pl?gene=BBS1
CROHN'S DISEASE	AIRE	Autoimmune Regulator	Protein Coding	50	GC21P044285	19.3827	https://www.genecards.org/cgi-bin/carddisp.pl?gene=AIRE
CROHN'S DISEASE	MIR192	MicroRNA 192	RNA Gene	24	GC11M064891	19.3471	https://www.genecards.org/cgi-bin/carddisp.pl?gene=MIR192
CROHN'S DISEASE	MLH1	MutL Homolog 1	Protein Coding	55	GC03P036993	19.3103	https://www.genecards.org/cgi-bin/carddisp.pl?gene=MLH1
CROHN'S DISEASE	IBD7	Inflammatory Bowel Disease 7	Genetic Locus	3	GC01U990338	19.2946	https://www.genecards.org/cgi-bin/carddisp.pl?gene=IBD7
CROHN'S DISEASE	MIR142	MicroRNA 142	RNA Gene	24	GC17M058331	19.2945	https://www.genecards.org/cgi-bin/carddisp.pl?gene=MIR142
CROHN'S DISEASE	SHOC2	SHOC2 Leucine Rich Repeat Scaffold Protein	Protein Coding	48	GC10P110919	19.2762	https://www.genecards.org/cgi-bin/carddisp.pl?gene=SHOC2
CROHN'S DISEASE	S100A8	S100 Calcium Binding Protein A8	Protein Coding	48	GC01M153391	19.1335	https://www.genecards.org/cgi-bin/carddisp.pl?gene=S100A8
CROHN'S DISEASE	TNFSF11	TNF Superfamily Member 11	Protein Coding	56	GC13P042562	19.1331	https://www.genecards.org/cgi-bin/carddisp.pl?gene=TNFSF11
CROHN'S DISEASE	CASP1	Caspase 1	Protein Coding	56	GC11M105025	19.0964	https://www.genecards.org/cgi-bin/carddisp.pl?gene=CASP1
CROHN'S DISEASE	COL3A1	Collagen Type III Alpha 1 Chain	Protein Coding	54	GC02P188974	19.078	https://www.genecards.org/cgi-bin/carddisp.pl?gene=COL3A1
CROHN'S DISEASE	CD79A	CD79a Molecule	Protein Coding	55	GC19P041877	19.0714	https://www.genecards.org/cgi-bin/carddisp.pl?gene=CD79A
CROHN'S DISEASE	LACC1	Laccase Domain Containing 1	Protein Coding	42	GC13P043879	19.0511	https://www.genecards.org/cgi-bin/carddisp.pl?gene=LACC1
CROHN'S DISEASE	BGLAP	Bone Gamma-Carboxyglutamate Protein	Protein Coding	46	GC01P156242	19.047	https://www.genecards.org/cgi-bin/carddisp.pl?gene=BGLAP
CROHN'S DISEASE	EDN1	Endothelin 1	Protein Coding	55	GC06P012256	19.0342	https://www.genecards.org/cgi-bin/carddisp.pl?gene=EDN1
CROHN'S DISEASE	ZEB2	Zinc Finger E-Box Binding Homeobox 2	Protein Coding	54	GC02M144384	19.0216	https://www.genecards.org/cgi-bin/carddisp.pl?gene=ZEB2
CROHN'S DISEASE	IL12RB1	Interleukin 12 Receptor Subunit Beta 1	Protein Coding	52	GC19M018058	18.9426	https://www.genecards.org/cgi-bin/carddisp.pl?gene=IL12RB1
CROHN'S DISEASE	MIR223	MicroRNA 223	RNA Gene	25	GC0XP066018	18.9375	https://www.genecards.org/cgi-bin/carddisp.pl?gene=MIR223
CROHN'S DISEASE	TNFAIP3	TNF Alpha Induced Protein 3	Protein Coding	55	GC06P137866	18.9101	https://www.genecards.org/cgi-bin/carddisp.pl?gene=TNFAIP3
CROHN'S DISEASE	CREBBP	CREB Binding Protein	Protein Coding	60	GC16M008258	18.8734	https://www.genecards.org/cgi-bin/carddisp.pl?gene=CREBBP
CROHN'S DISEASE	POMC	Proopiomelanocortin	Protein Coding	55	GC02M025160	18.8355	https://www.genecards.org/cgi-bin/carddisp.pl?gene=POMC
CROHN'S DISEASE	GPT	Glutamic--Pyruvic Transaminase	Protein Coding	48	GC08P144502	18.8242	https://www.genecards.org/cgi-bin/carddisp.pl?gene=GPT
CROHN'S DISEASE	ERBB3	Erb-B2 Receptor Tyrosine Kinase 3	Protein Coding	60	GC12P057479	18.823	https://www.genecards.org/cgi-bin/carddisp.pl?gene=ERBB3
CROHN'S DISEASE	NOD1	Nucleotide Binding Oligomerization Domain Containing 1	Protein Coding	50	GC07M030424	18.7801	https://www.genecards.org/cgi-bin/carddisp.pl?gene=NOD1
CROHN'S DISEASE	IBD15	Inflammatory Bowel Disease-15	Genetic Locus	2	GC10U901075	18.6893	https://www.genecards.org/cgi-bin/carddisp.pl?gene=IBD15
CROHN'S DISEASE	WFS1	Wolframin ER Transmembrane Glycoprotein	Protein Coding	53	GC04P006260	18.6604	https://www.genecards.org/cgi-bin/carddisp.pl?gene=WFS1
CROHN'S DISEASE	CD28	CD28 Molecule	Protein Coding	55	GC02P203706	18.6323	https://www.genecards.org/cgi-bin/carddisp.pl?gene=CD28
CROHN'S DISEASE	MSH2	MutS Homolog 2	Protein Coding	56	GC02P047403	18.599	https://www.genecards.org/cgi-bin/carddisp.pl?gene=MSH2
CROHN'S DISEASE	IBD18	Inflammatory Bowel Disease-18	Genetic Locus	2	GC05U901053	18.5783	https://www.genecards.org/cgi-bin/carddisp.pl?gene=IBD18
CROHN'S DISEASE	MYD88	MYD88 Innate Immune Signal Transduction Adaptor	Protein Coding	56	GC03P038152	18.5344	https://www.genecards.org/cgi-bin/carddisp.pl?gene=MYD88
CROHN'S DISEASE	IBD6	Inflammatory Bowel Disease 6	Genetic Locus	3	GC19U990206	18.5026	https://www.genecards.org/cgi-bin/carddisp.pl?gene=IBD6
CROHN'S DISEASE	IL1R1	Interleukin 1 Receptor Type 1	Protein Coding	53	GC02P102136	18.4022	https://www.genecards.org/cgi-bin/carddisp.pl?gene=IL1R1
CROHN'S DISEASE	CASP3	Caspase 3	Protein Coding	57	GC04M184627	18.3811	https://www.genecards.org/cgi-bin/carddisp.pl?gene=CASP3
CROHN'S DISEASE	SOS1	SOS Ras/Rac Guanine Nucleotide Exchange Factor 1	Protein Coding	56	GC02M039054	18.3797	https://www.genecards.org/cgi-bin/carddisp.pl?gene=SOS1
CROHN'S DISEASE	IBD4	Inflammatory Bowel Disease 4	Genetic Locus	3	GC14U990396	18.3782	https://www.genecards.org/cgi-bin/carddisp.pl?gene=IBD4
CROHN'S DISEASE	NOTCH3	Notch Receptor 3	Protein Coding	58	GC19M015159	18.3671	https://www.genecards.org/cgi-bin/carddisp.pl?gene=NOTCH3
CROHN'S DISEASE	BTNL2	Butyrophilin Like 2	Protein Coding	45	GC06M032393	18.3527	https://www.genecards.org/cgi-bin/carddisp.pl?gene=BTNL2
CROHN'S DISEASE	CEACAM6	CEA Cell Adhesion Molecule 6	Protein Coding	48	GC19P041750	18.3341	https://www.genecards.org/cgi-bin/carddisp.pl?gene=CEACAM6
CROHN'S DISEASE	IFT172	Intraflagellar Transport 172	Protein Coding	47	GC02M028277	18.3269	https://www.genecards.org/cgi-bin/carddisp.pl?gene=IFT172
CROHN'S DISEASE	USH2A	Usherin	Protein Coding	46	GC01M215622	18.2874	https://www.genecards.org/cgi-bin/carddisp.pl?gene=USH2A
CROHN'S DISEASE	ADAM10	ADAM Metallopeptidase Domain 10	Protein Coding	60	GC15M058588	18.2864	https://www.genecards.org/cgi-bin/carddisp.pl?gene=ADAM10
CROHN'S DISEASE	SH2D1A	SH2 Domain Containing 1A	Protein Coding	53	GC0XP124227	18.2753	https://www.genecards.org/cgi-bin/carddisp.pl?gene=SH2D1A
CROHN'S DISEASE	G6PD	Glucose-6-Phosphate Dehydrogenase	Protein Coding	57	GC0XM154562	18.2719	https://www.genecards.org/cgi-bin/carddisp.pl?gene=G6PD
CROHN'S DISEASE	LRP6	LDL Receptor Related Protein 6	Protein Coding	55	GC12M022658	18.2614	https://www.genecards.org/cgi-bin/carddisp.pl?gene=LRP6
CROHN'S DISEASE	ACP5	Acid Phosphatase 5, Tartrate Resistant	Protein Coding	53	GC19M011574	18.2553	https://www.genecards.org/cgi-bin/carddisp.pl?gene=ACP5
CROHN'S DISEASE	IL22	Interleukin 22	Protein Coding	49	GC12M068248	18.2406	https://www.genecards.org/cgi-bin/carddisp.pl?gene=IL22
CROHN'S DISEASE	IFIH1	Interferon Induced With Helicase C Domain 1	Protein Coding	55	GC02M162267	18.1853	https://www.genecards.org/cgi-bin/carddisp.pl?gene=IFIH1
CROHN'S DISEASE	CYP27A1	Cytochrome P450 Family 27 Subfamily A Member 1	Protein Coding	53	GC02P218781	18.1718	https://www.genecards.org/cgi-bin/carddisp.pl?gene=CYP27A1
CROHN'S DISEASE	IL6R	Interleukin 6 Receptor	Protein Coding	57	GC01P154405	18.168	https://www.genecards.org/cgi-bin/carddisp.pl?gene=IL6R
CROHN'S DISEASE	SP110	SP110 Nuclear Body Protein	Protein Coding	47	GC02M230167	18.1305	https://www.genecards.org/cgi-bin/carddisp.pl?gene=SP110
CROHN'S DISEASE	SAA1	Serum Amyloid A1	Protein Coding	46	GC11P018579	18.114	https://www.genecards.org/cgi-bin/carddisp.pl?gene=SAA1
CROHN'S DISEASE	IL17F	Interleukin 17F	Protein Coding	50	GC06M072074	18.0637	https://www.genecards.org/cgi-bin/carddisp.pl?gene=IL17F
CROHN'S DISEASE	SGSH	N-Sulfoglucosamine Sulfohydrolase	Protein Coding	52	GC17M080206	18.0633	https://www.genecards.org/cgi-bin/carddisp.pl?gene=SGSH
CROHN'S DISEASE	MSH6	MutS Homolog 6	Protein Coding	55	GC02P047695	18.0347	https://www.genecards.org/cgi-bin/carddisp.pl?gene=MSH6
CROHN'S DISEASE	NCSTN	Nicastrin	Protein Coding	55	GC01P160343	18.0318	https://www.genecards.org/cgi-bin/carddisp.pl?gene=NCSTN
CROHN'S DISEASE	CXCR4	C-X-C Motif Chemokine Receptor 4	Protein Coding	59	GC02M136114	18.0315	https://www.genecards.org/cgi-bin/carddisp.pl?gene=CXCR4
CROHN'S DISEASE	EP300	E1A Binding Protein P300	Protein Coding	59	GC22P045272	18.0266	https://www.genecards.org/cgi-bin/carddisp.pl?gene=EP300
CROHN'S DISEASE	AIFM1	Apoptosis Inducing Factor Mitochondria Associated 1	Protein Coding	56	GC0XM130129	18.0139	https://www.genecards.org/cgi-bin/carddisp.pl?gene=AIFM1
CROHN'S DISEASE	MYC	MYC Proto-Oncogene, BHLH Transcription Factor	Protein Coding	59	GC08P127735	18.0071	https://www.genecards.org/cgi-bin/carddisp.pl?gene=MYC
CROHN'S DISEASE	NTRK1	Neurotrophic Receptor Tyrosine Kinase 1	Protein Coding	57	GC01P156815	17.9669	https://www.genecards.org/cgi-bin/carddisp.pl?gene=NTRK1
CROHN'S DISEASE	CASP8	Caspase 8	Protein Coding	59	GC02P201233	17.9603	https://www.genecards.org/cgi-bin/carddisp.pl?gene=CASP8
CROHN'S DISEASE	F3	Coagulation Factor III, Tissue Factor	Protein Coding	52	GC01M094610	17.9235	https://www.genecards.org/cgi-bin/carddisp.pl?gene=F3
CROHN'S DISEASE	CAT	Catalase	Protein Coding	58	GC11P034460	17.886	https://www.genecards.org/cgi-bin/carddisp.pl?gene=CAT
CROHN'S DISEASE	PON2	Paraoxonase 2	Protein Coding	50	GC07M095404	17.8558	https://www.genecards.org/cgi-bin/carddisp.pl?gene=PON2
CROHN'S DISEASE	ADA	Adenosine Deaminase	Protein Coding	57	GC20M044620	17.8487	https://www.genecards.org/cgi-bin/carddisp.pl?gene=ADA
CROHN'S DISEASE	IFNA1	Interferon Alpha 1	Protein Coding	45	GC09P021611	17.8004	https://www.genecards.org/cgi-bin/carddisp.pl?gene=IFNA1
CROHN'S DISEASE	VCAM1	Vascular Cell Adhesion Molecule 1	Protein Coding	52	GC01P100719	17.7796	https://www.genecards.org/cgi-bin/carddisp.pl?gene=VCAM1
CROHN'S DISEASE	EDNRA	Endothelin Receptor Type A	Protein Coding	56	GC04P147480	17.7009	https://www.genecards.org/cgi-bin/carddisp.pl?gene=EDNRA
CROHN'S DISEASE	PSENEN	Presenilin Enhancer, Gamma-Secretase Subunit	Protein Coding	52	GC19P072742	17.6613	https://www.genecards.org/cgi-bin/carddisp.pl?gene=PSENEN
CROHN'S DISEASE	GSTM1	Glutathione S-Transferase Mu 1	Protein Coding	49	GC01P109687	17.6354	https://www.genecards.org/cgi-bin/carddisp.pl?gene=GSTM1
CROHN'S DISEASE	LTF	Lactotransferrin	Protein Coding	52	GC03M046435	17.6328	https://www.genecards.org/cgi-bin/carddisp.pl?gene=LTF
CROHN'S DISEASE	MIR328	MicroRNA 328	RNA Gene	22	GC16M067203	17.6178	https://www.genecards.org/cgi-bin/carddisp.pl?gene=MIR328
CROHN'S DISEASE	IBD8	Inflammatory Bowel Disease 8	Genetic Locus	3	GC16U990238	17.6032	https://www.genecards.org/cgi-bin/carddisp.pl?gene=IBD8
CROHN'S DISEASE	TYK2	Tyrosine Kinase 2	Protein Coding	60	GC19M010350	17.5916	https://www.genecards.org/cgi-bin/carddisp.pl?gene=TYK2
CROHN'S DISEASE	IBD9	Inflammatory Bowel Disease 9	Genetic Locus	3	GC03U900016	17.5645	https://www.genecards.org/cgi-bin/carddisp.pl?gene=IBD9
CROHN'S DISEASE	F10	Coagulation Factor X	Protein Coding	57	GC13P113122	17.543	https://www.genecards.org/cgi-bin/carddisp.pl?gene=F10
CROHN'S DISEASE	RTEL1	Regulator Of Telomere Elongation Helicase 1	Protein Coding	48	GC20P063658	17.473	https://www.genecards.org/cgi-bin/carddisp.pl?gene=RTEL1
CROHN'S DISEASE	ALPL	Alkaline Phosphatase, Biomineralization Associated	Protein Coding	58	GC01P021508	17.4713	https://www.genecards.org/cgi-bin/carddisp.pl?gene=ALPL
CROHN'S DISEASE	PMS2	PMS1 Homolog 2, Mismatch Repair System Component	Protein Coding	55	GC07M005973	17.4552	https://www.genecards.org/cgi-bin/carddisp.pl?gene=PMS2
CROHN'S DISEASE	FCGR3A	Fc Gamma Receptor IIIa	Protein Coding	53	GC01M161541	17.4545	https://www.genecards.org/cgi-bin/carddisp.pl?gene=FCGR3A
CROHN'S DISEASE	NFKBIA	NFKB Inhibitor Alpha	Protein Coding	57	GC14M035401	17.4206	https://www.genecards.org/cgi-bin/carddisp.pl?gene=NFKBIA
CROHN'S DISEASE	CCL3	C-C Motif Chemokine Ligand 3	Protein Coding	46	GC17M036088	17.4168	https://www.genecards.org/cgi-bin/carddisp.pl?gene=CCL3
CROHN'S DISEASE	IL23A	Interleukin 23 Subunit Alpha	Protein Coding	46	GC12P057557	17.4	https://www.genecards.org/cgi-bin/carddisp.pl?gene=IL23A
CROHN'S DISEASE	CHEK2	Checkpoint Kinase 2	Protein Coding	61	GC22M028687	17.3785	https://www.genecards.org/cgi-bin/carddisp.pl?gene=CHEK2
CROHN'S DISEASE	IGF2	Insulin Like Growth Factor 2	Protein Coding	55	GC11M004506	17.3507	https://www.genecards.org/cgi-bin/carddisp.pl?gene=IGF2
CROHN'S DISEASE	ABCG8	ATP Binding Cassette Subfamily G Member 8	Protein Coding	50	GC02P043828	17.2871	https://www.genecards.org/cgi-bin/carddisp.pl?gene=ABCG8
CROHN'S DISEASE	BACH2	BTB Domain And CNC Homolog 2	Protein Coding	50	GC06M089926	17.2464	https://www.genecards.org/cgi-bin/carddisp.pl?gene=BACH2
CROHN'S DISEASE	SELE	Selectin E	Protein Coding	50	GC01M169722	17.2325	https://www.genecards.org/cgi-bin/carddisp.pl?gene=SELE
CROHN'S DISEASE	SRC	SRC Proto-Oncogene, Non-Receptor Tyrosine Kinase	Protein Coding	58	GC20P037344	17.2293	https://www.genecards.org/cgi-bin/carddisp.pl?gene=SRC
CROHN'S DISEASE	IBD16	Inflammatory Bowel Disease-16	Genetic Locus	2	GC09U901202	17.1986	https://www.genecards.org/cgi-bin/carddisp.pl?gene=IBD16
CROHN'S DISEASE	CARD11	Caspase Recruitment Domain Family Member 11	Protein Coding	53	GC07M002906	17.1356	https://www.genecards.org/cgi-bin/carddisp.pl?gene=CARD11
CROHN'S DISEASE	TLR3	Toll Like Receptor 3	Protein Coding	58	GC04P186059	17.1295	https://www.genecards.org/cgi-bin/carddisp.pl?gene=TLR3
CROHN'S DISEASE	PI4KA	Phosphatidylinositol 4-Kinase Alpha	Protein Coding	55	GC22M020707	17.0893	https://www.genecards.org/cgi-bin/carddisp.pl?gene=PI4KA
CROHN'S DISEASE	GUSB	Glucuronidase Beta	Protein Coding	54	GC07M065960	17.0838	https://www.genecards.org/cgi-bin/carddisp.pl?gene=GUSB
CROHN'S DISEASE	PTPN2	Protein Tyrosine Phosphatase Non-Receptor Type 2	Protein Coding	54	GC18M027584	17.0814	https://www.genecards.org/cgi-bin/carddisp.pl?gene=PTPN2
CROHN'S DISEASE	NR1H4	Nuclear Receptor Subfamily 1 Group H Member 4	Protein Coding	55	GC12P100473	17.0696	https://www.genecards.org/cgi-bin/carddisp.pl?gene=NR1H4
CROHN'S DISEASE	MIR31	MicroRNA 31	RNA Gene	22	GC09M021837	17.0371	https://www.genecards.org/cgi-bin/carddisp.pl?gene=MIR31
CROHN'S DISEASE	ZAP70	Zeta Chain Of T Cell Receptor Associated Protein Kinase 70	Protein Coding	59	GC02P097773	16.9796	https://www.genecards.org/cgi-bin/carddisp.pl?gene=ZAP70
CROHN'S DISEASE	IBD11	Inflammatory Bowel Disease 11	Genetic Locus	2	GC07U903153	16.9727	https://www.genecards.org/cgi-bin/carddisp.pl?gene=IBD11
CROHN'S DISEASE	IBD12	Inflammatory Bowel Disease 12	Genetic Locus	2	GC03U901153	16.9727	https://www.genecards.org/cgi-bin/carddisp.pl?gene=IBD12
CROHN'S DISEASE	IBD20	Inflammatory Bowel Disease-20	Genetic Locus	2	GC10U901067	16.9727	https://www.genecards.org/cgi-bin/carddisp.pl?gene=IBD20
CROHN'S DISEASE	IBD22	Inflammatory Bowel Disease-22	Genetic Locus	2	GC17U901173	16.9727	https://www.genecards.org/cgi-bin/carddisp.pl?gene=IBD22
CROHN'S DISEASE	IBD23	Inflammatory Bowel Disease-23	Genetic Locus	2	GC01U902305	16.9727	https://www.genecards.org/cgi-bin/carddisp.pl?gene=IBD23
CROHN'S DISEASE	IBD24	Inflammatory Bowel Disease-24	Genetic Locus	2	GC20U900442	16.9727	https://www.genecards.org/cgi-bin/carddisp.pl?gene=IBD24
CROHN'S DISEASE	IBD26	Inflammatory Bowel Disease-26	Genetic Locus	2	GC12U901067	16.9727	https://www.genecards.org/cgi-bin/carddisp.pl?gene=IBD26
CROHN'S DISEASE	IBD27	Inflammatory Bowel Disease-27	Genetic Locus	2	GC13U900664	16.9727	https://www.genecards.org/cgi-bin/carddisp.pl?gene=IBD27
CROHN'S DISEASE	HIF1A	Hypoxia Inducible Factor 1 Subunit Alpha	Protein Coding	54	GC14P061695	16.9716	https://www.genecards.org/cgi-bin/carddisp.pl?gene=HIF1A
CROHN'S DISEASE	PAH	Phenylalanine Hydroxylase	Protein Coding	55	GC12M102836	16.9651	https://www.genecards.org/cgi-bin/carddisp.pl?gene=PAH
CROHN'S DISEASE	TIMP1	TIMP Metallopeptidase Inhibitor 1	Protein Coding	52	GC0XP047711	16.9638	https://www.genecards.org/cgi-bin/carddisp.pl?gene=TIMP1
CROHN'S DISEASE	PTH	Parathyroid Hormone	Protein Coding	52	GC11M013492	16.9555	https://www.genecards.org/cgi-bin/carddisp.pl?gene=PTH
CROHN'S DISEASE	PPARGC1A	PPARG Coactivator 1 Alpha	Protein Coding	53	GC04M023755	16.9555	https://www.genecards.org/cgi-bin/carddisp.pl?gene=PPARGC1A
CROHN'S DISEASE	EGF	Epidermal Growth Factor	Protein Coding	58	GC04P109912	16.9458	https://www.genecards.org/cgi-bin/carddisp.pl?gene=EGF
CROHN'S DISEASE	ADAMTS13	ADAM Metallopeptidase With Thrombospondin Type 1 Motif 13	Protein Coding	55	GC09P133414	16.9172	https://www.genecards.org/cgi-bin/carddisp.pl?gene=ADAMTS13
CROHN'S DISEASE	MIR29C	MicroRNA 29c	RNA Gene	21	GC01M207811	16.8932	https://www.genecards.org/cgi-bin/carddisp.pl?gene=MIR29C
CROHN'S DISEASE	FZD4	Frizzled Class Receptor 4	Protein Coding	56	GC11M086945	16.8815	https://www.genecards.org/cgi-bin/carddisp.pl?gene=FZD4
CROHN'S DISEASE	STAT5B	Signal Transducer And Activator Of Transcription 5B	Protein Coding	56	GC17M042199	16.8795	https://www.genecards.org/cgi-bin/carddisp.pl?gene=STAT5B
CROHN'S DISEASE	RUNX1	RUNX Family Transcription Factor 1	Protein Coding	56	GC21M034787	16.8644	https://www.genecards.org/cgi-bin/carddisp.pl?gene=RUNX1
CROHN'S DISEASE	SHH	Sonic Hedgehog Signaling Molecule	Protein Coding	57	GC07M155799	16.8514	https://www.genecards.org/cgi-bin/carddisp.pl?gene=SHH
CROHN'S DISEASE	GCG	Glucagon	Protein Coding	48	GC02M162142	16.8026	https://www.genecards.org/cgi-bin/carddisp.pl?gene=GCG
CROHN'S DISEASE	MTM1	Myotubularin 1	Protein Coding	50	GC0XP150562	16.796	https://www.genecards.org/cgi-bin/carddisp.pl?gene=MTM1
CROHN'S DISEASE	IL18RAP	Interleukin 18 Receptor Accessory Protein	Protein Coding	46	GC02P102418	16.7931	https://www.genecards.org/cgi-bin/carddisp.pl?gene=IL18RAP
CROHN'S DISEASE	CXCL10	C-X-C Motif Chemokine Ligand 10	Protein Coding	51	GC04M076021	16.7861	https://www.genecards.org/cgi-bin/carddisp.pl?gene=CXCL10
CROHN'S DISEASE	JUN	Jun Proto-Oncogene, AP-1 Transcription Factor Subunit	Protein Coding	55	GC01M058780	16.7251	https://www.genecards.org/cgi-bin/carddisp.pl?gene=JUN
CROHN'S DISEASE	HTRA1	HtrA Serine Peptidase 1	Protein Coding	52	GC10P122461	16.6954	https://www.genecards.org/cgi-bin/carddisp.pl?gene=HTRA1
CROHN'S DISEASE	ITGA3	Integrin Subunit Alpha 3	Protein Coding	55	GC17P050055	16.665	https://www.genecards.org/cgi-bin/carddisp.pl?gene=ITGA3
CROHN'S DISEASE	AGER	Advanced Glycosylation End-Product Specific Receptor	Protein Coding	53	GC06M032180	16.6444	https://www.genecards.org/cgi-bin/carddisp.pl?gene=AGER
CROHN'S DISEASE	MYO9B	Myosin IXB	Protein Coding	50	GC19P072400	16.6243	https://www.genecards.org/cgi-bin/carddisp.pl?gene=MYO9B
CROHN'S DISEASE	HNF4A	Hepatocyte Nuclear Factor 4 Alpha	Protein Coding	56	GC20P044355	16.6204	https://www.genecards.org/cgi-bin/carddisp.pl?gene=HNF4A
CROHN'S DISEASE	SELP	Selectin P	Protein Coding	52	GC01M169558	16.6098	https://www.genecards.org/cgi-bin/carddisp.pl?gene=SELP
CROHN'S DISEASE	PDGFRB	Platelet Derived Growth Factor Receptor Beta	Protein Coding	60	GC05M150113	16.5836	https://www.genecards.org/cgi-bin/carddisp.pl?gene=PDGFRB
CROHN'S DISEASE	ERBB4	Erb-B2 Receptor Tyrosine Kinase 4	Protein Coding	61	GC02M211375	16.5674	https://www.genecards.org/cgi-bin/carddisp.pl?gene=ERBB4
CROHN'S DISEASE	HLA-G	Major Histocompatibility Complex, Class I, G	Protein Coding	50	GC06P092102	16.5647	https://www.genecards.org/cgi-bin/carddisp.pl?gene=HLA-G
CROHN'S DISEASE	PLA2G2A	Phospholipase A2 Group IIA	Protein Coding	53	GC01M019975	16.5527	https://www.genecards.org/cgi-bin/carddisp.pl?gene=PLA2G2A
CROHN'S DISEASE	COL11A1	Collagen Type XI Alpha 1 Chain	Protein Coding	50	GC01M102876	16.5494	https://www.genecards.org/cgi-bin/carddisp.pl?gene=COL11A1
CROHN'S DISEASE	LRAT	Lecithin Retinol Acyltransferase	Protein Coding	51	GC04P154626	16.54	https://www.genecards.org/cgi-bin/carddisp.pl?gene=LRAT
CROHN'S DISEASE	GATA6	GATA Binding Protein 6	Protein Coding	53	GC18P022169	16.4515	https://www.genecards.org/cgi-bin/carddisp.pl?gene=GATA6
CROHN'S DISEASE	SLC2A1	Solute Carrier Family 2 Member 1	Protein Coding	60	GC01M042925	16.45	https://www.genecards.org/cgi-bin/carddisp.pl?gene=SLC2A1
CROHN'S DISEASE	IL12A	Interleukin 12A	Protein Coding	51	GC03P159988	16.3858	https://www.genecards.org/cgi-bin/carddisp.pl?gene=IL12A
CROHN'S DISEASE	PTCH1	Patched 1	Protein Coding	57	GC09M095442	16.3593	https://www.genecards.org/cgi-bin/carddisp.pl?gene=PTCH1
CROHN'S DISEASE	RBP4	Retinol Binding Protein 4	Protein Coding	52	GC10M093591	16.3325	https://www.genecards.org/cgi-bin/carddisp.pl?gene=RBP4
CROHN'S DISEASE	VIM	Vimentin	Protein Coding	57	GC10P017227	16.3113	https://www.genecards.org/cgi-bin/carddisp.pl?gene=VIM
CROHN'S DISEASE	CLU	Clusterin	Protein Coding	54	GC08M027596	16.3095	https://www.genecards.org/cgi-bin/carddisp.pl?gene=CLU
CROHN'S DISEASE	IRF4	Interferon Regulatory Factor 4	Protein Coding	50	GC06P000391	16.3088	https://www.genecards.org/cgi-bin/carddisp.pl?gene=IRF4
CROHN'S DISEASE	CSF3	Colony Stimulating Factor 3	Protein Coding	47	GC17P040015	16.3015	https://www.genecards.org/cgi-bin/carddisp.pl?gene=CSF3
CROHN'S DISEASE	GUCY2C	Guanylate Cyclase 2C	Protein Coding	52	GC12M014612	16.2818	https://www.genecards.org/cgi-bin/carddisp.pl?gene=GUCY2C
CROHN'S DISEASE	STXBP2	Syntaxin Binding Protein 2	Protein Coding	51	GC19P007948	16.279	https://www.genecards.org/cgi-bin/carddisp.pl?gene=STXBP2
CROHN'S DISEASE	CAV1	Caveolin 1	Protein Coding	55	GC07P116524	16.2728	https://www.genecards.org/cgi-bin/carddisp.pl?gene=CAV1
CROHN'S DISEASE	LOX	Lysyl Oxidase	Protein Coding	54	GC05M122063	16.2549	https://www.genecards.org/cgi-bin/carddisp.pl?gene=LOX
CROHN'S DISEASE	SLC34A1	Solute Carrier Family 34 Member 1	Protein Coding	51	GC05P177664	16.2404	https://www.genecards.org/cgi-bin/carddisp.pl?gene=SLC34A1
CROHN'S DISEASE	CXCL12	C-X-C Motif Chemokine Ligand 12	Protein Coding	51	GC10M044370	16.2377	https://www.genecards.org/cgi-bin/carddisp.pl?gene=CXCL12
CROHN'S DISEASE	PLG	Plasminogen	Protein Coding	56	GC06P160702	16.2362	https://www.genecards.org/cgi-bin/carddisp.pl?gene=PLG
CROHN'S DISEASE	MIR342	MicroRNA 342	RNA Gene	22	GC14P100109	16.2329	https://www.genecards.org/cgi-bin/carddisp.pl?gene=MIR342
CROHN'S DISEASE	ACHE	Acetylcholinesterase (Cartwright Blood Group)	Protein Coding	53	GC07M100889	16.1637	https://www.genecards.org/cgi-bin/carddisp.pl?gene=ACHE
CROHN'S DISEASE	GSTP1	Glutathione S-Transferase Pi 1	Protein Coding	57	GC11P067583	16.1605	https://www.genecards.org/cgi-bin/carddisp.pl?gene=GSTP1
CROHN'S DISEASE	KDR	Kinase Insert Domain Receptor	Protein Coding	60	GC04M055078	16.1591	https://www.genecards.org/cgi-bin/carddisp.pl?gene=KDR
CROHN'S DISEASE	FGF2	Fibroblast Growth Factor 2	Protein Coding	52	GC04P122826	16.1214	https://www.genecards.org/cgi-bin/carddisp.pl?gene=FGF2
CROHN'S DISEASE	UGT1A1	UDP Glucuronosyltransferase Family 1 Member A1	Protein Coding	57	GC02P233760	16.0862	https://www.genecards.org/cgi-bin/carddisp.pl?gene=UGT1A1
CROHN'S DISEASE	ITGB3	Integrin Subunit Beta 3	Protein Coding	59	GC17P062247	16.0613	https://www.genecards.org/cgi-bin/carddisp.pl?gene=ITGB3
CROHN'S DISEASE	MTR	5-Methyltetrahydrofolate-Homocysteine Methyltransferase	Protein Coding	54	GC01P236795	16.056	https://www.genecards.org/cgi-bin/carddisp.pl?gene=MTR
CROHN'S DISEASE	CALR	Calreticulin	Protein Coding	58	GC19P012938	15.9983	https://www.genecards.org/cgi-bin/carddisp.pl?gene=CALR
CROHN'S DISEASE	FLT4	Fms Related Receptor Tyrosine Kinase 4	Protein Coding	59	GC05M180644	15.9903	https://www.genecards.org/cgi-bin/carddisp.pl?gene=FLT4
CROHN'S DISEASE	CALCA	Calcitonin Related Polypeptide Alpha	Protein Coding	50	GC11M014945	15.9841	https://www.genecards.org/cgi-bin/carddisp.pl?gene=CALCA
CROHN'S DISEASE	CFI	Complement Factor I	Protein Coding	54	GC04M109732	15.9758	https://www.genecards.org/cgi-bin/carddisp.pl?gene=CFI
CROHN'S DISEASE	IRAK4	Interleukin 1 Receptor Associated Kinase 4	Protein Coding	55	GC12P043758	15.9726	https://www.genecards.org/cgi-bin/carddisp.pl?gene=IRAK4
CROHN'S DISEASE	TF	Transferrin	Protein Coding	57	GC03P135056	15.9615	https://www.genecards.org/cgi-bin/carddisp.pl?gene=TF
CROHN'S DISEASE	RELA	RELA Proto-Oncogene, NF-KB Subunit	Protein Coding	59	GC11M065653	15.9234	https://www.genecards.org/cgi-bin/carddisp.pl?gene=RELA
CROHN'S DISEASE	SOD2	Superoxide Dismutase 2	Protein Coding	53	GC06M159669	15.9202	https://www.genecards.org/cgi-bin/carddisp.pl?gene=SOD2
CROHN'S DISEASE	PIK3R1	Phosphoinositide-3-Kinase Regulatory Subunit 1	Protein Coding	57	GC05P068215	15.8642	https://www.genecards.org/cgi-bin/carddisp.pl?gene=PIK3R1
CROHN'S DISEASE	S100A12	S100 Calcium Binding Protein A12	Protein Coding	44	GC01M153373	15.8173	https://www.genecards.org/cgi-bin/carddisp.pl?gene=S100A12
CROHN'S DISEASE	RETN	Resistin	Protein Coding	49	GC19P007669	15.7943	https://www.genecards.org/cgi-bin/carddisp.pl?gene=RETN
CROHN'S DISEASE	IL7R	Interleukin 7 Receptor	Protein Coding	52	GC05P035852	15.7649	https://www.genecards.org/cgi-bin/carddisp.pl?gene=IL7R
CROHN'S DISEASE	EYS	Eyes Shut Homolog	Protein Coding	41	GC06M063719	15.6981	https://www.genecards.org/cgi-bin/carddisp.pl?gene=EYS
CROHN'S DISEASE	NR3C1	Nuclear Receptor Subfamily 3 Group C Member 1	Protein Coding	56	GC05M143277	15.6801	https://www.genecards.org/cgi-bin/carddisp.pl?gene=NR3C1
CROHN'S DISEASE	INSR	Insulin Receptor	Protein Coding	60	GC19M007112	15.6676	https://www.genecards.org/cgi-bin/carddisp.pl?gene=INSR
CROHN'S DISEASE	BAX	BCL2 Associated X, Apoptosis Regulator	Protein Coding	57	GC19P048954	15.6466	https://www.genecards.org/cgi-bin/carddisp.pl?gene=BAX
CROHN'S DISEASE	IL12RB2	Interleukin 12 Receptor Subunit Beta 2	Protein Coding	51	GC01P067307	15.6335	https://www.genecards.org/cgi-bin/carddisp.pl?gene=IL12RB2
CROHN'S DISEASE	ERCC2	ERCC Excision Repair 2, TFIIH Core Complex Helicase Subunit	Protein Coding	53	GC19M045349	15.6239	https://www.genecards.org/cgi-bin/carddisp.pl?gene=ERCC2
CROHN'S DISEASE	MIR107	MicroRNA 107	RNA Gene	23	GC10M089604	15.591	https://www.genecards.org/cgi-bin/carddisp.pl?gene=MIR107
CROHN'S DISEASE	SLC6A4	Solute Carrier Family 6 Member 4	Protein Coding	55	GC17M030194	15.5586	https://www.genecards.org/cgi-bin/carddisp.pl?gene=SLC6A4
CROHN'S DISEASE	MITF	Melanocyte Inducing Transcription Factor	Protein Coding	55	GC03P069788	15.5335	https://www.genecards.org/cgi-bin/carddisp.pl?gene=MITF
CROHN'S DISEASE	KAT6B	Lysine Acetyltransferase 6B	Protein Coding	52	GC10P074873	15.5205	https://www.genecards.org/cgi-bin/carddisp.pl?gene=KAT6B
CROHN'S DISEASE	LBR	Lamin B Receptor	Protein Coding	54	GC01M225401	15.5015	https://www.genecards.org/cgi-bin/carddisp.pl?gene=LBR
CROHN'S DISEASE	MIR221	MicroRNA 221	RNA Gene	23	GC0XM045746	15.49	https://www.genecards.org/cgi-bin/carddisp.pl?gene=MIR221
CROHN'S DISEASE	ITGB2	Integrin Subunit Beta 2	Protein Coding	57	GC21M044885	15.486	https://www.genecards.org/cgi-bin/carddisp.pl?gene=ITGB2
CROHN'S DISEASE	SLC9A3	Solute Carrier Family 9 Member A3	Protein Coding	54	GC05M000472	15.4801	https://www.genecards.org/cgi-bin/carddisp.pl?gene=SLC9A3
CROHN'S DISEASE	TBX21	T-Box Transcription Factor 21	Protein Coding	52	GC17P047733	15.4784	https://www.genecards.org/cgi-bin/carddisp.pl?gene=TBX21
CROHN'S DISEASE	TLR1	Toll Like Receptor 1	Protein Coding	55	GC04M038793	15.467	https://www.genecards.org/cgi-bin/carddisp.pl?gene=TLR1
CROHN'S DISEASE	HAMP	Hepcidin Antimicrobial Peptide	Protein Coding	50	GC19P072728	15.4407	https://www.genecards.org/cgi-bin/carddisp.pl?gene=HAMP
CROHN'S DISEASE	PALB2	Partner And Localizer Of BRCA2	Protein Coding	51	GC16M023603	15.4394	https://www.genecards.org/cgi-bin/carddisp.pl?gene=PALB2
CROHN'S DISEASE	POGLUT1	Protein O-Glucosyltransferase 1	Protein Coding	48	GC03P119468	15.4088	https://www.genecards.org/cgi-bin/carddisp.pl?gene=POGLUT1
CROHN'S DISEASE	IL21R	Interleukin 21 Receptor	Protein Coding	51	GC16P042494	15.407	https://www.genecards.org/cgi-bin/carddisp.pl?gene=IL21R
CROHN'S DISEASE	F13A1	Coagulation Factor XIII A Chain	Protein Coding	53	GC06M006144	15.3845	https://www.genecards.org/cgi-bin/carddisp.pl?gene=F13A1
CROHN'S DISEASE	ACVRL1	Activin A Receptor Like Type 1	Protein Coding	57	GC12P051906	15.3802	https://www.genecards.org/cgi-bin/carddisp.pl?gene=ACVRL1
CROHN'S DISEASE	ERAP1	Endoplasmic Reticulum Aminopeptidase 1	Protein Coding	53	GC05M096760	15.3692	https://www.genecards.org/cgi-bin/carddisp.pl?gene=ERAP1
CROHN'S DISEASE	IL2RB	Interleukin 2 Receptor Subunit Beta	Protein Coding	56	GC22M061459	15.3626	https://www.genecards.org/cgi-bin/carddisp.pl?gene=IL2RB
CROHN'S DISEASE	CCR1	C-C Motif Chemokine Receptor 1	Protein Coding	52	GC03M046218	15.3594	https://www.genecards.org/cgi-bin/carddisp.pl?gene=CCR1
CROHN'S DISEASE	SMAD2	SMAD Family Member 2	Protein Coding	59	GC18M047809	15.3301	https://www.genecards.org/cgi-bin/carddisp.pl?gene=SMAD2
CROHN'S DISEASE	RIPK2	Receptor Interacting Serine/Threonine Kinase 2	Protein Coding	53	GC08P089823	15.3166	https://www.genecards.org/cgi-bin/carddisp.pl?gene=RIPK2
CROHN'S DISEASE	DNMT3A	DNA Methyltransferase 3 Alpha	Protein Coding	57	GC02M025228	15.3122	https://www.genecards.org/cgi-bin/carddisp.pl?gene=DNMT3A
CROHN'S DISEASE	MIR141	MicroRNA 141	RNA Gene	24	GC12P023565	15.2499	https://www.genecards.org/cgi-bin/carddisp.pl?gene=MIR141
CROHN'S DISEASE	MST1	Macrophage Stimulating 1	Protein Coding	53	GC03M049683	15.2378	https://www.genecards.org/cgi-bin/carddisp.pl?gene=MST1
CROHN'S DISEASE	GHRL	Ghrelin And Obestatin Prepropeptide	Protein Coding	49	GC03M010285	15.2332	https://www.genecards.org/cgi-bin/carddisp.pl?gene=GHRL
CROHN'S DISEASE	MIR30A	MicroRNA 30a	RNA Gene	22	GC06M071403	15.2209	https://www.genecards.org/cgi-bin/carddisp.pl?gene=MIR30A
CROHN'S DISEASE	GAPDH	Glyceraldehyde-3-Phosphate Dehydrogenase	Protein Coding	57	GC12P023539	15.2172	https://www.genecards.org/cgi-bin/carddisp.pl?gene=GAPDH
CROHN'S DISEASE	KIF5A	Kinesin Family Member 5A	Protein Coding	51	GC12P057555	15.1599	https://www.genecards.org/cgi-bin/carddisp.pl?gene=KIF5A
CROHN'S DISEASE	TMEM106B	Transmembrane Protein 106B	Protein Coding	46	GC07P012230	15.1514	https://www.genecards.org/cgi-bin/carddisp.pl?gene=TMEM106B
CROHN'S DISEASE	CARD10	Caspase Recruitment Domain Family Member 10	Protein Coding	46	GC22M061474	15.1278	https://www.genecards.org/cgi-bin/carddisp.pl?gene=CARD10
CROHN'S DISEASE	CIITA	Class II Major Histocompatibility Complex Transactivator	Protein Coding	51	GC16P013730	15.1087	https://www.genecards.org/cgi-bin/carddisp.pl?gene=CIITA
CROHN'S DISEASE	MUTYH	MutY DNA Glycosylase	Protein Coding	52	GC01M045329	15.035	https://www.genecards.org/cgi-bin/carddisp.pl?gene=MUTYH
CROHN'S DISEASE	NGF	Nerve Growth Factor	Protein Coding	58	GC01M115285	15.0219	https://www.genecards.org/cgi-bin/carddisp.pl?gene=NGF
CROHN'S DISEASE	DLG5	Discs Large MAGUK Scaffold Protein 5	Protein Coding	45	GC10M077790	14.9838	https://www.genecards.org/cgi-bin/carddisp.pl?gene=DLG5
CROHN'S DISEASE	HPRT1	Hypoxanthine Phosphoribosyltransferase 1	Protein Coding	55	GC0XP134460	14.9778	https://www.genecards.org/cgi-bin/carddisp.pl?gene=HPRT1
CROHN'S DISEASE	DES	Desmin	Protein Coding	55	GC02P219418	14.9717	https://www.genecards.org/cgi-bin/carddisp.pl?gene=DES
CROHN'S DISEASE	IDH1	Isocitrate Dehydrogenase (NADP(+)) 1	Protein Coding	60	GC02M208236	14.9681	https://www.genecards.org/cgi-bin/carddisp.pl?gene=IDH1
CROHN'S DISEASE	DUOX2	Dual Oxidase 2	Protein Coding	51	GC15M045092	14.9667	https://www.genecards.org/cgi-bin/carddisp.pl?gene=DUOX2
CROHN'S DISEASE	MIR150	MicroRNA 150	RNA Gene	24	GC19M049500	14.9607	https://www.genecards.org/cgi-bin/carddisp.pl?gene=MIR150
CROHN'S DISEASE	CDKN2B	Cyclin Dependent Kinase Inhibitor 2B	Protein Coding	53	GC09M022002	14.959	https://www.genecards.org/cgi-bin/carddisp.pl?gene=CDKN2B
CROHN'S DISEASE	IL15	Interleukin 15	Protein Coding	49	GC04P141636	14.9478	https://www.genecards.org/cgi-bin/carddisp.pl?gene=IL15
CROHN'S DISEASE	PECAM1	Platelet And Endothelial Cell Adhesion Molecule 1	Protein Coding	47	GC17M064319	14.9455	https://www.genecards.org/cgi-bin/carddisp.pl?gene=PECAM1
CROHN'S DISEASE	ABCC6	ATP Binding Cassette Subfamily C Member 6	Protein Coding	53	GC16M016148	14.9232	https://www.genecards.org/cgi-bin/carddisp.pl?gene=ABCC6
CROHN'S DISEASE	ACE2	Angiotensin Converting Enzyme 2	Protein Coding	56	GC0XM015494	14.8947	https://www.genecards.org/cgi-bin/carddisp.pl?gene=ACE2
CROHN'S DISEASE	MIR196A1	MicroRNA 196a-1	RNA Gene	24	GC17M048632	14.8676	https://www.genecards.org/cgi-bin/carddisp.pl?gene=MIR196A1
CROHN'S DISEASE	CD27	CD27 Molecule	Protein Coding	54	GC12P023523	14.8086	https://www.genecards.org/cgi-bin/carddisp.pl?gene=CD27
CROHN'S DISEASE	IFNGR2	Interferon Gamma Receptor 2	Protein Coding	51	GC21P033402	14.8001	https://www.genecards.org/cgi-bin/carddisp.pl?gene=IFNGR2
CROHN'S DISEASE	WNT1	Wnt Family Member 1	Protein Coding	52	GC12P049566	14.7928	https://www.genecards.org/cgi-bin/carddisp.pl?gene=WNT1
CROHN'S DISEASE	FCGR3B	Fc Gamma Receptor IIIb	Protein Coding	50	GC01M161623	14.7907	https://www.genecards.org/cgi-bin/carddisp.pl?gene=FCGR3B
CROHN'S DISEASE	TPO	Thyroid Peroxidase	Protein Coding	56	GC02P001374	14.7889	https://www.genecards.org/cgi-bin/carddisp.pl?gene=TPO
CROHN'S DISEASE	SST	Somatostatin	Protein Coding	47	GC03M187668	14.7729	https://www.genecards.org/cgi-bin/carddisp.pl?gene=SST
CROHN'S DISEASE	FLCN	Folliculin	Protein Coding	48	GC17M017212	14.768	https://www.genecards.org/cgi-bin/carddisp.pl?gene=FLCN
CROHN'S DISEASE	ANXA11	Annexin A11	Protein Coding	50	GC10M080150	14.763	https://www.genecards.org/cgi-bin/carddisp.pl?gene=ANXA11
CROHN'S DISEASE	IRF1	Interferon Regulatory Factor 1	Protein Coding	53	GC05M132440	14.751	https://www.genecards.org/cgi-bin/carddisp.pl?gene=IRF1
CROHN'S DISEASE	TFRC	Transferrin Receptor	Protein Coding	58	GC03M196056	14.7464	https://www.genecards.org/cgi-bin/carddisp.pl?gene=TFRC
CROHN'S DISEASE	HMGCR	3-Hydroxy-3-Methylglutaryl-CoA Reductase	Protein Coding	53	GC05P075336	14.7353	https://www.genecards.org/cgi-bin/carddisp.pl?gene=HMGCR
CROHN'S DISEASE	MUC5AC	Mucin 5AC, Oligomeric Mucus/Gel-Forming	Protein Coding	46	GC11P002129	14.7342	https://www.genecards.org/cgi-bin/carddisp.pl?gene=MUC5AC
CROHN'S DISEASE	PNPLA3	Patatin Like Phospholipase Domain Containing 3	Protein Coding	48	GC22P043923	14.7266	https://www.genecards.org/cgi-bin/carddisp.pl?gene=PNPLA3
CROHN'S DISEASE	CD274	CD274 Molecule	Protein Coding	52	GC09P005450	14.7211	https://www.genecards.org/cgi-bin/carddisp.pl?gene=CD274
CROHN'S DISEASE	MIR93	MicroRNA 93	RNA Gene	24	GC07M102257	14.7184	https://www.genecards.org/cgi-bin/carddisp.pl?gene=MIR93
CROHN'S DISEASE	NOS1	Nitric Oxide Synthase 1	Protein Coding	56	GC12M117208	14.6974	https://www.genecards.org/cgi-bin/carddisp.pl?gene=NOS1
CROHN'S DISEASE	FCGR2B	Fc Gamma Receptor IIb	Protein Coding	56	GC01P161823	14.6922	https://www.genecards.org/cgi-bin/carddisp.pl?gene=FCGR2B
CROHN'S DISEASE	CEP43	Centrosomal Protein 43	Protein Coding	45	GC06P167001	14.6384	https://www.genecards.org/cgi-bin/carddisp.pl?gene=CEP43
CROHN'S DISEASE	GMPPB	GDP-Mannose Pyrophosphorylase B	Protein Coding	50	GC03M049716	14.6219	https://www.genecards.org/cgi-bin/carddisp.pl?gene=GMPPB
CROHN'S DISEASE	CDKN2B-AS1	CDKN2B Antisense RNA 1	RNA Gene	26	GC09P021994	14.6185	https://www.genecards.org/cgi-bin/carddisp.pl?gene=CDKN2B-AS1
CROHN'S DISEASE	MIR20A	MicroRNA 20a	RNA Gene	22	GC13P091580	14.6104	https://www.genecards.org/cgi-bin/carddisp.pl?gene=MIR20A
CROHN'S DISEASE	IL4R	Interleukin 4 Receptor	Protein Coding	55	GC16P042490	14.6098	https://www.genecards.org/cgi-bin/carddisp.pl?gene=IL4R
CROHN'S DISEASE	MIR27A	MicroRNA 27a	RNA Gene	26	GC19M014656	14.6054	https://www.genecards.org/cgi-bin/carddisp.pl?gene=MIR27A
CROHN'S DISEASE	IL18BP	Interleukin 18 Binding Protein	Protein Coding	48	GC11P071998	14.5802	https://www.genecards.org/cgi-bin/carddisp.pl?gene=IL18BP
CROHN'S DISEASE	S100B	S100 Calcium Binding Protein B	Protein Coding	51	GC21M051379	14.5691	https://www.genecards.org/cgi-bin/carddisp.pl?gene=S100B
CROHN'S DISEASE	FLT1	Fms Related Receptor Tyrosine Kinase 1	Protein Coding	57	GC13M028300	14.5562	https://www.genecards.org/cgi-bin/carddisp.pl?gene=FLT1
CROHN'S DISEASE	FLNC	Filamin C	Protein Coding	52	GC07P128830	14.5358	https://www.genecards.org/cgi-bin/carddisp.pl?gene=FLNC
CROHN'S DISEASE	CCN2	Cellular Communication Network Factor 2	Protein Coding	53	GC06M131948	14.5351	https://www.genecards.org/cgi-bin/carddisp.pl?gene=CCN2
CROHN'S DISEASE	MIR203A	MicroRNA 203a	RNA Gene	23	GC14P110640	14.5245	https://www.genecards.org/cgi-bin/carddisp.pl?gene=MIR203A
CROHN'S DISEASE	RYR2	Ryanodine Receptor 2	Protein Coding	53	GC01P237042	14.5217	https://www.genecards.org/cgi-bin/carddisp.pl?gene=RYR2
CROHN'S DISEASE	DCAF8	DDB1 And CUL4 Associated Factor 8	Protein Coding	45	GC01M160215	14.5123	https://www.genecards.org/cgi-bin/carddisp.pl?gene=DCAF8
CROHN'S DISEASE	PLA2G7	Phospholipase A2 Group VII	Protein Coding	56	GC06M046704	14.5106	https://www.genecards.org/cgi-bin/carddisp.pl?gene=PLA2G7
CROHN'S DISEASE	SH2B3	SH2B Adaptor Protein 3	Protein Coding	54	GC12P111405	14.5074	https://www.genecards.org/cgi-bin/carddisp.pl?gene=SH2B3
CROHN'S DISEASE	PTH1R	Parathyroid Hormone 1 Receptor	Protein Coding	57	GC03P046877	14.5013	https://www.genecards.org/cgi-bin/carddisp.pl?gene=PTH1R
CROHN'S DISEASE	LRBA	LPS Responsive Beige-Like Anchor Protein	Protein Coding	47	GC04M150264	14.4927	https://www.genecards.org/cgi-bin/carddisp.pl?gene=LRBA
CROHN'S DISEASE	RUNX2	RUNX Family Transcription Factor 2	Protein Coding	53	GC06P092371	14.4892	https://www.genecards.org/cgi-bin/carddisp.pl?gene=RUNX2
CROHN'S DISEASE	WAS	WASP Actin Nucleation Promoting Factor	Protein Coding	55	GC0XP048676	14.4807	https://www.genecards.org/cgi-bin/carddisp.pl?gene=WAS
CROHN'S DISEASE	PDGFB	Platelet Derived Growth Factor Subunit B	Protein Coding	58	GC22M062326	14.4582	https://www.genecards.org/cgi-bin/carddisp.pl?gene=PDGFB
CROHN'S DISEASE	PSMB9	Proteasome 20S Subunit Beta 9	Protein Coding	52	GC06P092185	14.4403	https://www.genecards.org/cgi-bin/carddisp.pl?gene=PSMB9
CROHN'S DISEASE	TGFB3	Transforming Growth Factor Beta 3	Protein Coding	54	GC14M075958	14.4372	https://www.genecards.org/cgi-bin/carddisp.pl?gene=TGFB3
CROHN'S DISEASE	ALOX5	Arachidonate 5-Lipoxygenase	Protein Coding	54	GC10P045374	14.4222	https://www.genecards.org/cgi-bin/carddisp.pl?gene=ALOX5
CROHN'S DISEASE	MIR200B	MicroRNA 200b	RNA Gene	24	GC01P001167	14.381	https://www.genecards.org/cgi-bin/carddisp.pl?gene=MIR200B
CROHN'S DISEASE	TLR7	Toll Like Receptor 7	Protein Coding	55	GC0XP012867	14.3739	https://www.genecards.org/cgi-bin/carddisp.pl?gene=TLR7
CROHN'S DISEASE	MET	MET Proto-Oncogene, Receptor Tyrosine Kinase	Protein Coding	61	GC07P116672	14.3721	https://www.genecards.org/cgi-bin/carddisp.pl?gene=MET
CROHN'S DISEASE	KL	Klotho	Protein Coding	54	GC13P033016	14.3717	https://www.genecards.org/cgi-bin/carddisp.pl?gene=KL
CROHN'S DISEASE	BCL10	BCL10 Immune Signaling Adaptor	Protein Coding	51	GC01M085265	14.3717	https://www.genecards.org/cgi-bin/carddisp.pl?gene=BCL10
CROHN'S DISEASE	HNF1A	HNF1 Homeobox A	Protein Coding	53	GC12P120978	14.3651	https://www.genecards.org/cgi-bin/carddisp.pl?gene=HNF1A
CROHN'S DISEASE	TAB2	TGF-Beta Activated Kinase 1 (MAP3K7) Binding Protein 2	Protein Coding	55	GC06P149218	14.3526	https://www.genecards.org/cgi-bin/carddisp.pl?gene=TAB2
CROHN'S DISEASE	CDC42	Cell Division Cycle 42	Protein Coding	57	GC01P022052	14.3498	https://www.genecards.org/cgi-bin/carddisp.pl?gene=CDC42
CROHN'S DISEASE	GSK3B	Glycogen Synthase Kinase 3 Beta	Protein Coding	57	GC03M119821	14.3481	https://www.genecards.org/cgi-bin/carddisp.pl?gene=GSK3B
CROHN'S DISEASE	NEU1	Neuraminidase 1	Protein Coding	52	GC06M031857	14.3345	https://www.genecards.org/cgi-bin/carddisp.pl?gene=NEU1
CROHN'S DISEASE	MIR320A	MicroRNA 320a	RNA Gene	24	GC08M022274	14.3304	https://www.genecards.org/cgi-bin/carddisp.pl?gene=MIR320A
CROHN'S DISEASE	HMGB1	High Mobility Group Box 1	Protein Coding	54	GC13M030456	14.3234	https://www.genecards.org/cgi-bin/carddisp.pl?gene=HMGB1
CROHN'S DISEASE	PPARA	Peroxisome Proliferator Activated Receptor Alpha	Protein Coding	51	GC22P046150	14.3204	https://www.genecards.org/cgi-bin/carddisp.pl?gene=PPARA
CROHN'S DISEASE	SDHA	Succinate Dehydrogenase Complex Flavoprotein Subunit A	Protein Coding	54	GC05P000220	14.3196	https://www.genecards.org/cgi-bin/carddisp.pl?gene=SDHA
CROHN'S DISEASE	HSPA4	Heat Shock Protein Family A (Hsp70) Member 4	Protein Coding	49	GC05P133054	14.3157	https://www.genecards.org/cgi-bin/carddisp.pl?gene=HSPA4
CROHN'S DISEASE	MIR22	MicroRNA 22	RNA Gene	23	GC17M001713	14.3131	https://www.genecards.org/cgi-bin/carddisp.pl?gene=MIR22
CROHN'S DISEASE	RAF1	Raf-1 Proto-Oncogene, Serine/Threonine Kinase	Protein Coding	61	GC03M012583	14.2978	https://www.genecards.org/cgi-bin/carddisp.pl?gene=RAF1
CROHN'S DISEASE	IL7	Interleukin 7	Protein Coding	50	GC08M078689	14.2905	https://www.genecards.org/cgi-bin/carddisp.pl?gene=IL7
CROHN'S DISEASE	CYP2D6	Cytochrome P450 Family 2 Subfamily D Member 6	Protein Coding	53	GC22M042126	14.2594	https://www.genecards.org/cgi-bin/carddisp.pl?gene=CYP2D6
CROHN'S DISEASE	SLC26A2	Solute Carrier Family 26 Member 2	Protein Coding	51	GC05P149944	14.234	https://www.genecards.org/cgi-bin/carddisp.pl?gene=SLC26A2
CROHN'S DISEASE	PLAT	Plasminogen Activator, Tissue Type	Protein Coding	57	GC08M042174	14.2146	https://www.genecards.org/cgi-bin/carddisp.pl?gene=PLAT
CROHN'S DISEASE	CACNA1C	Calcium Voltage-Gated Channel Subunit Alpha1 C	Protein Coding	56	GC12P001970	14.197	https://www.genecards.org/cgi-bin/carddisp.pl?gene=CACNA1C
CROHN'S DISEASE	TOR1A	Torsin Family 1 Member A	Protein Coding	52	GC09M129812	14.1956	https://www.genecards.org/cgi-bin/carddisp.pl?gene=TOR1A
CROHN'S DISEASE	KCNN4	Potassium Calcium-Activated Channel Subfamily N Member 4	Protein Coding	55	GC19M070686	14.1519	https://www.genecards.org/cgi-bin/carddisp.pl?gene=KCNN4
CROHN'S DISEASE	DRD2	Dopamine Receptor D2	Protein Coding	56	GC11M113409	14.1489	https://www.genecards.org/cgi-bin/carddisp.pl?gene=DRD2
CROHN'S DISEASE	KNG1	Kininogen 1	Protein Coding	55	GC03P186717	14.1473	https://www.genecards.org/cgi-bin/carddisp.pl?gene=KNG1
CROHN'S DISEASE	NOTCH2	Notch Receptor 2	Protein Coding	59	GC01M119911	14.1003	https://www.genecards.org/cgi-bin/carddisp.pl?gene=NOTCH2
CROHN'S DISEASE	SIAE	Sialic Acid Acetylesterase	Protein Coding	44	GC11M124633	14.085	https://www.genecards.org/cgi-bin/carddisp.pl?gene=SIAE
CROHN'S DISEASE	NBN	Nibrin	Protein Coding	55	GC08M089933	14.0609	https://www.genecards.org/cgi-bin/carddisp.pl?gene=NBN
CROHN'S DISEASE	DAG1	Dystroglycan 1	Protein Coding	53	GC03P050014	14.0538	https://www.genecards.org/cgi-bin/carddisp.pl?gene=DAG1
CROHN'S DISEASE	MIR199A1	MicroRNA 199a-1	RNA Gene	22	GC19M010817	14.0381	https://www.genecards.org/cgi-bin/carddisp.pl?gene=MIR199A1
CROHN'S DISEASE	ZNF687	Zinc Finger Protein 687	Protein Coding	44	GC01P151281	14.0268	https://www.genecards.org/cgi-bin/carddisp.pl?gene=ZNF687
CROHN'S DISEASE	MT-CO2	Mitochondrially Encoded Cytochrome C Oxidase II	Protein Coding	39	GCMTP007587	14.0214	https://www.genecards.org/cgi-bin/carddisp.pl?gene=MT-CO2
CROHN'S DISEASE	MBP	Myelin Basic Protein	Protein Coding	51	GC18M076978	14.0177	https://www.genecards.org/cgi-bin/carddisp.pl?gene=MBP
CROHN'S DISEASE	COL5A1	Collagen Type V Alpha 1 Chain	Protein Coding	53	GC09P134641	13.9855	https://www.genecards.org/cgi-bin/carddisp.pl?gene=COL5A1
CROHN'S DISEASE	CXCR3	C-X-C Motif Chemokine Receptor 3	Protein Coding	51	GC0XM071615	13.9744	https://www.genecards.org/cgi-bin/carddisp.pl?gene=CXCR3
CROHN'S DISEASE	SOCS1	Suppressor Of Cytokine Signaling 1	Protein Coding	52	GC16M012467	13.9682	https://www.genecards.org/cgi-bin/carddisp.pl?gene=SOCS1
CROHN'S DISEASE	RPS27A	Ribosomal Protein S27a	Protein Coding	48	GC02P055231	13.9545	https://www.genecards.org/cgi-bin/carddisp.pl?gene=RPS27A
CROHN'S DISEASE	ACTC1	Actin Alpha Cardiac Muscle 1	Protein Coding	51	GC15M034790	13.9476	https://www.genecards.org/cgi-bin/carddisp.pl?gene=ACTC1
CROHN'S DISEASE	CD80	CD80 Molecule	Protein Coding	51	GC03M119524	13.9326	https://www.genecards.org/cgi-bin/carddisp.pl?gene=CD80
CROHN'S DISEASE	INPP5D	Inositol Polyphosphate-5-Phosphatase D	Protein Coding	51	GC02P233059	13.89	https://www.genecards.org/cgi-bin/carddisp.pl?gene=INPP5D
CROHN'S DISEASE	IMPG2	Interphotoreceptor Matrix Proteoglycan 2	Protein Coding	46	GC03M101222	13.8758	https://www.genecards.org/cgi-bin/carddisp.pl?gene=IMPG2
CROHN'S DISEASE	CTSB	Cathepsin B	Protein Coding	59	GC08M011842	13.871	https://www.genecards.org/cgi-bin/carddisp.pl?gene=CTSB
CROHN'S DISEASE	BRIP1	BRCA1 Interacting Helicase 1	Protein Coding	54	GC17M061679	13.8696	https://www.genecards.org/cgi-bin/carddisp.pl?gene=BRIP1
CROHN'S DISEASE	IFNB1	Interferon Beta 1	Protein Coding	50	GC09M021077	13.8693	https://www.genecards.org/cgi-bin/carddisp.pl?gene=IFNB1
CROHN'S DISEASE	SPINK1	Serine Peptidase Inhibitor Kazal Type 1	Protein Coding	48	GC05M147825	13.8566	https://www.genecards.org/cgi-bin/carddisp.pl?gene=SPINK1
CROHN'S DISEASE	IKZF1	IKAROS Family Zinc Finger 1	Protein Coding	56	GC07P050303	13.847	https://www.genecards.org/cgi-bin/carddisp.pl?gene=IKZF1
CROHN'S DISEASE	MMP13	Matrix Metallopeptidase 13	Protein Coding	57	GC11M102942	13.8388	https://www.genecards.org/cgi-bin/carddisp.pl?gene=MMP13
CROHN'S DISEASE	ANG	Angiogenin	Protein Coding	51	GC14P034388	13.8374	https://www.genecards.org/cgi-bin/carddisp.pl?gene=ANG
CROHN'S DISEASE	CD209	CD209 Molecule	Protein Coding	50	GC19M007739	13.8155	https://www.genecards.org/cgi-bin/carddisp.pl?gene=CD209
CROHN'S DISEASE	PKD2L1	Polycystin 2 Like 1, Transient Receptor Potential Cation Channel	Protein Coding	48	GC10M100288	13.789	https://www.genecards.org/cgi-bin/carddisp.pl?gene=PKD2L1
CROHN'S DISEASE	JAK1	Janus Kinase 1	Protein Coding	60	GC01M064833	13.7691	https://www.genecards.org/cgi-bin/carddisp.pl?gene=JAK1
CROHN'S DISEASE	CACNA1S	Calcium Voltage-Gated Channel Subunit Alpha1 S	Protein Coding	55	GC01M201008	13.7649	https://www.genecards.org/cgi-bin/carddisp.pl?gene=CACNA1S
CROHN'S DISEASE	ACTB	Actin Beta	Protein Coding	56	GC07M005527	13.749	https://www.genecards.org/cgi-bin/carddisp.pl?gene=ACTB
CROHN'S DISEASE	CTSK	Cathepsin K	Protein Coding	57	GC01M152758	13.7451	https://www.genecards.org/cgi-bin/carddisp.pl?gene=CTSK
CROHN'S DISEASE	SYP	Synaptophysin	Protein Coding	52	GC0XM049187	13.7307	https://www.genecards.org/cgi-bin/carddisp.pl?gene=SYP
CROHN'S DISEASE	MIR34C	MicroRNA 34c	RNA Gene	24	GC11P111985	13.7017	https://www.genecards.org/cgi-bin/carddisp.pl?gene=MIR34C
CROHN'S DISEASE	MIR182	MicroRNA 182	RNA Gene	24	GC07M129770	13.6893	https://www.genecards.org/cgi-bin/carddisp.pl?gene=MIR182
CROHN'S DISEASE	PIK3CD	Phosphatidylinositol-4,5-Bisphosphate 3-Kinase Catalytic Subunit Delta	Protein Coding	60	GC01P009628	13.684	https://www.genecards.org/cgi-bin/carddisp.pl?gene=PIK3CD
CROHN'S DISEASE	BLM	BLM RecQ Like Helicase	Protein Coding	56	GC15P090717	13.6696	https://www.genecards.org/cgi-bin/carddisp.pl?gene=BLM
CROHN'S DISEASE	RB1	RB Transcriptional Corepressor 1	Protein Coding	55	GC13P048303	13.6681	https://www.genecards.org/cgi-bin/carddisp.pl?gene=RB1
CROHN'S DISEASE	SELL	Selectin L	Protein Coding	50	GC01M169690	13.6646	https://www.genecards.org/cgi-bin/carddisp.pl?gene=SELL
CROHN'S DISEASE	MIR127	MicroRNA 127	RNA Gene	23	GC14P110568	13.6633	https://www.genecards.org/cgi-bin/carddisp.pl?gene=MIR127
CROHN'S DISEASE	U2AF1	U2 Small Nuclear RNA Auxiliary Factor 1	Protein Coding	50	GC21M043092	13.6627	https://www.genecards.org/cgi-bin/carddisp.pl?gene=U2AF1
CROHN'S DISEASE	LCN2	Lipocalin 2	Protein Coding	52	GC09P128149	13.6615	https://www.genecards.org/cgi-bin/carddisp.pl?gene=LCN2
CROHN'S DISEASE	KCNJ10	Potassium Inwardly Rectifying Channel Subfamily J Member 10	Protein Coding	52	GC01M159998	13.6597	https://www.genecards.org/cgi-bin/carddisp.pl?gene=KCNJ10
CROHN'S DISEASE	BTK	Bruton Tyrosine Kinase	Protein Coding	60	GC0XM101349	13.6494	https://www.genecards.org/cgi-bin/carddisp.pl?gene=BTK
CROHN'S DISEASE	HGF	Hepatocyte Growth Factor	Protein Coding	58	GC07M081699	13.6292	https://www.genecards.org/cgi-bin/carddisp.pl?gene=HGF
CROHN'S DISEASE	CDKN1A	Cyclin Dependent Kinase Inhibitor 1A	Protein Coding	55	GC06P092294	13.6242	https://www.genecards.org/cgi-bin/carddisp.pl?gene=CDKN1A
CROHN'S DISEASE	TYMP	Thymidine Phosphorylase	Protein Coding	54	GC22M050525	13.6188	https://www.genecards.org/cgi-bin/carddisp.pl?gene=TYMP
CROHN'S DISEASE	IRS1	Insulin Receptor Substrate 1	Protein Coding	53	GC02M226731	13.6162	https://www.genecards.org/cgi-bin/carddisp.pl?gene=IRS1
CROHN'S DISEASE	MIR10B	MicroRNA 10b	RNA Gene	24	GC02P176150	13.6103	https://www.genecards.org/cgi-bin/carddisp.pl?gene=MIR10B
CROHN'S DISEASE	PRODH	Proline Dehydrogenase 1	Protein Coding	52	GC22M018912	13.6073	https://www.genecards.org/cgi-bin/carddisp.pl?gene=PRODH
CROHN'S DISEASE	SERPINH1	Serpin Family H Member 1	Protein Coding	53	GC11P075562	13.6068	https://www.genecards.org/cgi-bin/carddisp.pl?gene=SERPINH1
CROHN'S DISEASE	MIR214	MicroRNA 214	RNA Gene	25	GC01M172234	13.5965	https://www.genecards.org/cgi-bin/carddisp.pl?gene=MIR214
CROHN'S DISEASE	UBE2L3	Ubiquitin Conjugating Enzyme E2 L3	Protein Coding	51	GC22P021549	13.5839	https://www.genecards.org/cgi-bin/carddisp.pl?gene=UBE2L3
CROHN'S DISEASE	DEFB4A	Defensin Beta 4A	Protein Coding	42	GC08P007900	13.5681	https://www.genecards.org/cgi-bin/carddisp.pl?gene=DEFB4A
CROHN'S DISEASE	BMP4	Bone Morphogenetic Protein 4	Protein Coding	55	GC14M053949	13.5651	https://www.genecards.org/cgi-bin/carddisp.pl?gene=BMP4
CROHN'S DISEASE	DDC	Dopa Decarboxylase	Protein Coding	57	GC07M050458	13.5645	https://www.genecards.org/cgi-bin/carddisp.pl?gene=DDC
CROHN'S DISEASE	CYP19A1	Cytochrome P450 Family 19 Subfamily A Member 1	Protein Coding	55	GC15M051208	13.5496	https://www.genecards.org/cgi-bin/carddisp.pl?gene=CYP19A1
CROHN'S DISEASE	TCF4	Transcription Factor 4	Protein Coding	54	GC18M055222	13.5407	https://www.genecards.org/cgi-bin/carddisp.pl?gene=TCF4
CROHN'S DISEASE	MIR204	MicroRNA 204	RNA Gene	26	GC09M070809	13.531	https://www.genecards.org/cgi-bin/carddisp.pl?gene=MIR204
CROHN'S DISEASE	ESR2	Estrogen Receptor 2	Protein Coding	56	GC14M064084	13.5191	https://www.genecards.org/cgi-bin/carddisp.pl?gene=ESR2
CROHN'S DISEASE	LDHA	Lactate Dehydrogenase A	Protein Coding	57	GC11P018394	13.5178	https://www.genecards.org/cgi-bin/carddisp.pl?gene=LDHA
CROHN'S DISEASE	POFUT1	Protein O-Fucosyltransferase 1	Protein Coding	51	GC20P032207	13.5147	https://www.genecards.org/cgi-bin/carddisp.pl?gene=POFUT1
CROHN'S DISEASE	NCF4-AS1	NCF4 Antisense RNA 1	RNA Gene	18	GC22M061453	13.502	https://www.genecards.org/cgi-bin/carddisp.pl?gene=NCF4-AS1
CROHN'S DISEASE	CRYAB	Crystallin Alpha B	Protein Coding	53	GC11M111908	13.4933	https://www.genecards.org/cgi-bin/carddisp.pl?gene=CRYAB
CROHN'S DISEASE	CYP21A2	Cytochrome P450 Family 21 Subfamily A Member 2	Protein Coding	51	GC06P092176	13.4921	https://www.genecards.org/cgi-bin/carddisp.pl?gene=CYP21A2
CROHN'S DISEASE	TNFSF13B	TNF Superfamily Member 13b	Protein Coding	52	GC13P108251	13.4895	https://www.genecards.org/cgi-bin/carddisp.pl?gene=TNFSF13B
CROHN'S DISEASE	SYNE1	Spectrin Repeat Containing Nuclear Envelope Protein 1	Protein Coding	47	GC06M152121	13.4888	https://www.genecards.org/cgi-bin/carddisp.pl?gene=SYNE1
CROHN'S DISEASE	ARHGEF2	Rho/Rac Guanine Nucleotide Exchange Factor 2	Protein Coding	52	GC01M155946	13.4858	https://www.genecards.org/cgi-bin/carddisp.pl?gene=ARHGEF2
CROHN'S DISEASE	FGA	Fibrinogen Alpha Chain	Protein Coding	56	GC04M154583	13.4689	https://www.genecards.org/cgi-bin/carddisp.pl?gene=FGA
CROHN'S DISEASE	NR3C2	Nuclear Receptor Subfamily 3 Group C Member 2	Protein Coding	52	GC04M148078	13.4536	https://www.genecards.org/cgi-bin/carddisp.pl?gene=NR3C2
CROHN'S DISEASE	ALK	ALK Receptor Tyrosine Kinase	Protein Coding	59	GC02M029190	13.4433	https://www.genecards.org/cgi-bin/carddisp.pl?gene=ALK
CROHN'S DISEASE	DYRK1A	Dual Specificity Tyrosine Phosphorylation Regulated Kinase 1A	Protein Coding	57	GC21P037365	13.4222	https://www.genecards.org/cgi-bin/carddisp.pl?gene=DYRK1A
CROHN'S DISEASE	TREX1	Three Prime Repair Exonuclease 1	Protein Coding	49	GC03P049976	13.4062	https://www.genecards.org/cgi-bin/carddisp.pl?gene=TREX1
CROHN'S DISEASE	L1CAM	L1 Cell Adhesion Molecule	Protein Coding	54	GC0XM153864	13.4046	https://www.genecards.org/cgi-bin/carddisp.pl?gene=L1CAM
CROHN'S DISEASE	CYCS	Cytochrome C, Somatic	Protein Coding	55	GC07M025118	13.3766	https://www.genecards.org/cgi-bin/carddisp.pl?gene=CYCS
[truncated: 4,724 more rows]

## Sheet: UC_DisGenet
Disease	Disease_id	Gene	Gene_id	UniProt	Gene_Full_Name	Protein_Class	N_diseases_g	DSI_g	DPI_g	pLI	Score_gda	EL_gda	EI_gda	N_PMIDs	N_SNPs_gda	First_Ref	Last_Ref
[truncated: 1,458 more rows]

[truncated: 3 more sheets: CD_disgenet, IBD_genecards, IBD_disgenet]
