# Supplementary material for: Exploring the bioactives and the mechanism of Aegle marmelos in the treatment of Inflammatory bowel disease through network pharmacology and molecular docking approach
Source: Research Square preprint supplement (doi:10.21203/rs.3.rs-3421028/v1), 2023-10-13
Supplement: Supplementary file 3 [file 6e680c1ada9b3fc5da3e77c7.docx]

| **Protein**  **Name** | **Protein**  **PDB** | **Grids** | **Compounds** | **Docking Score (kcal/mol)** | **Hydrogen bond interaction** | **Binding site interactions** |
| --- | --- | --- | --- | --- | --- | --- |
| **PI3K** | **1E7U** | Center_x = 23.028  center_y = 62.413  center_z = 20.582    size_x = 42  size_y = 51  size_z = 50 | **Aegeline** | **-7.5** | ARG:849 | 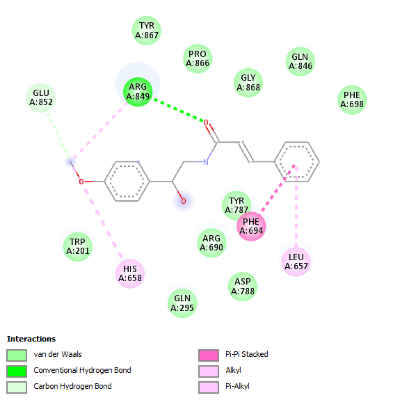 |
|  |  |  | **Auraptene** | **-8** | CYS: 869  ARG:690 | 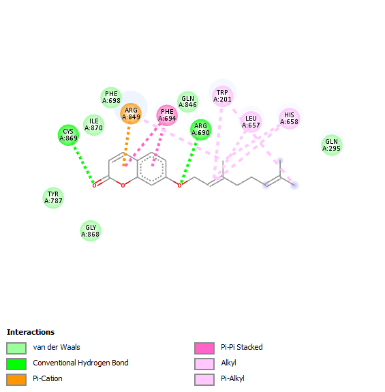 |
|  |  |  | **Bergapten** | **-8.2** | CYS: 869  ARG:690 | 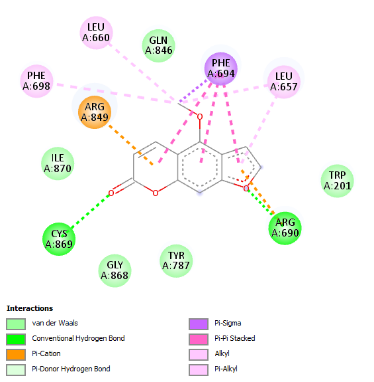 |
|  |  |  | **Imperatorin** | **-8.9** | ARG:690 | 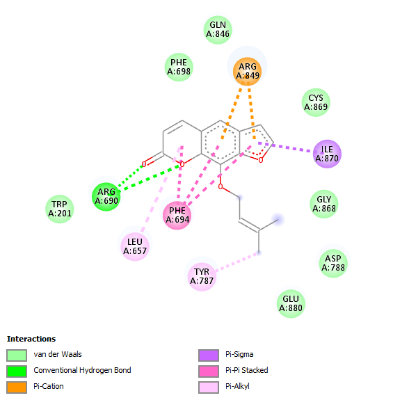 |
|  |  |  | **Marmesin** | **-7.7** | GLN:291  GLN:846 | 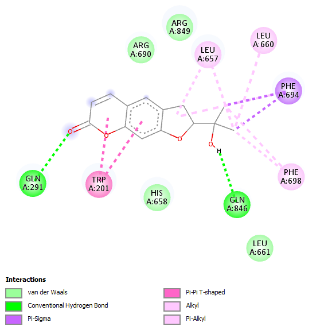 |
|  |  |  | **Nodakenin** | **-8.8** | TYR:210  GLU:852  GLN:291 | 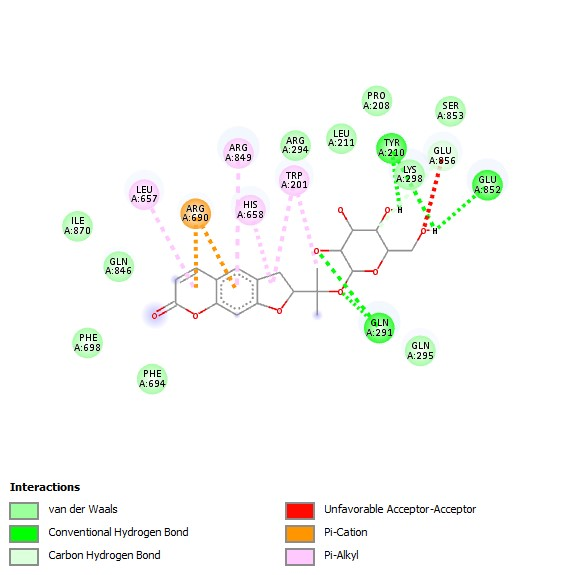 |
| **EGFR**  **(Endothelial Growth Factor Receptor)** | **3G5X** | center_x = 23.094  center_y = 18.130  center_z = 60.451  size_x = 40  size_y = 40  size_z = 40 | **Aegeline** | **-7.6** | THR:18  SER:68 | 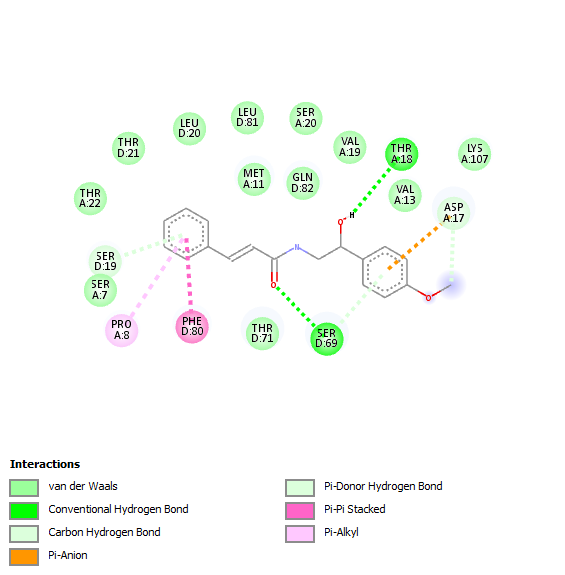 |
|  |  |  | **Auraptene** | **-8.2** | LEU:20  SER:19 | 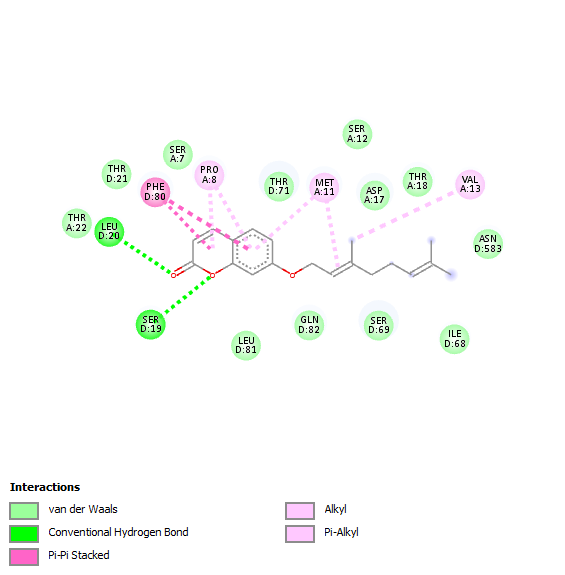 |
|  |  |  | **Bergapten** | **-6.8** | SER:69 | 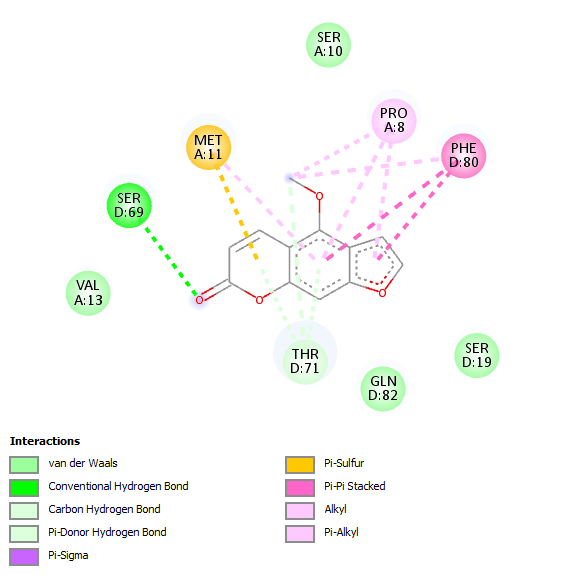 |
|  |  |  | **Imperatorin** | **-7.9** | SER:19 | 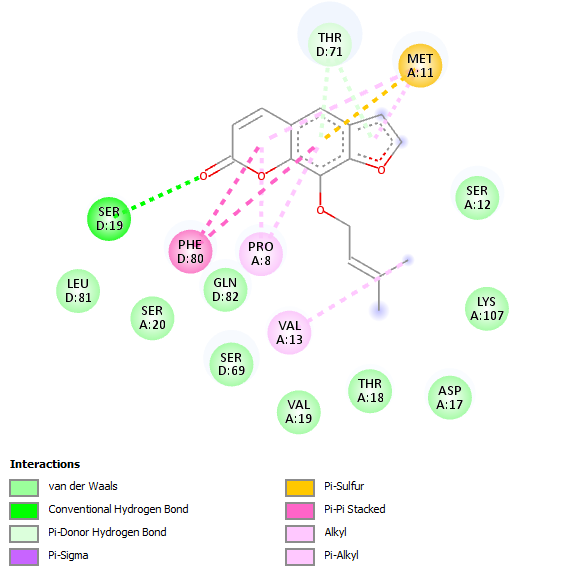 |
|  |  |  | **Marmesin** | **-8.1** | SER:69  THR:22 | 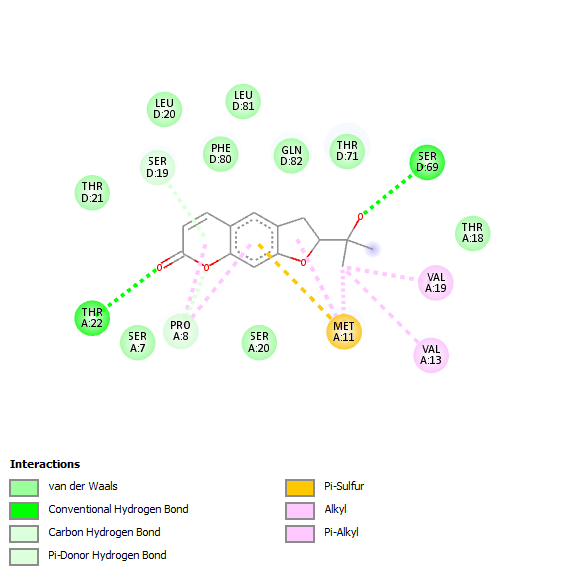 |
|  |  |  | **Nodakenin** | **10.1** | SER D:19  SER D:69  LEU: 20  THR: 18 | 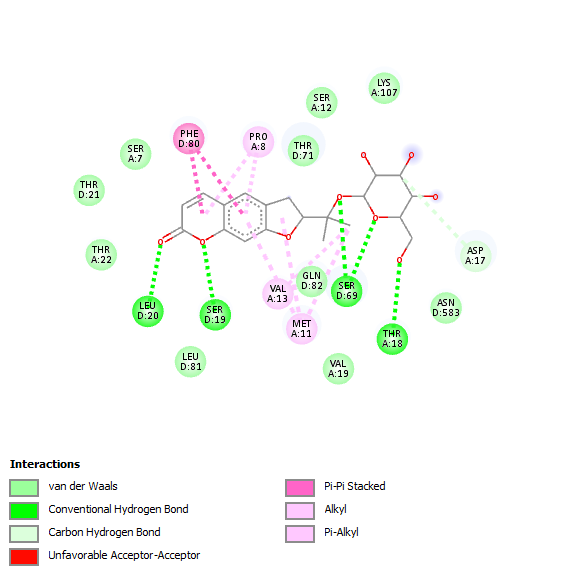 |
| **MAPK1**  **(Mitogen Activated Protein Kinase 1)** | **4FUX** | center_x = 18.517  center_y = 6.377  center_z = 16.735  size_x = 40  size_y = 45  size_z = 50 | **Aegeline** | **-7.0** | ARG: 89  LYS: 97  ASP: 98 | 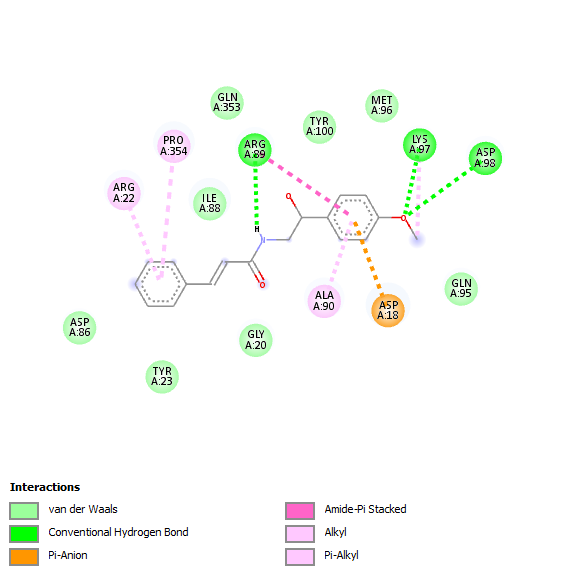 |
|  |  |  | **Auraptene** | **-6.1** | ASP: 109 | 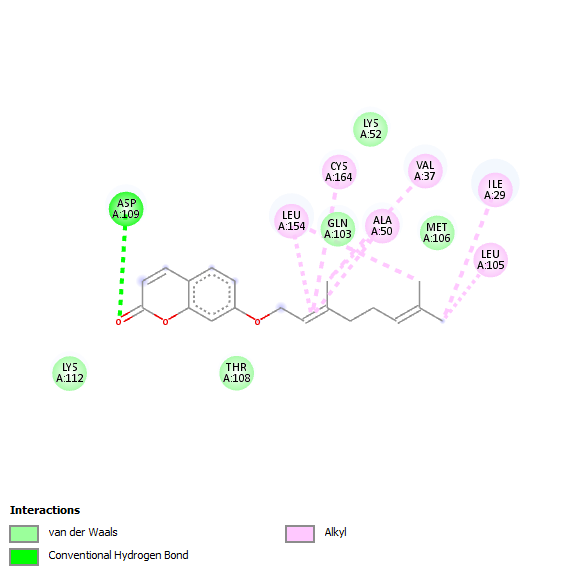 |
|  |  |  | **Bergapten** | **-6.0** | ASP: 109  MET: 106 | 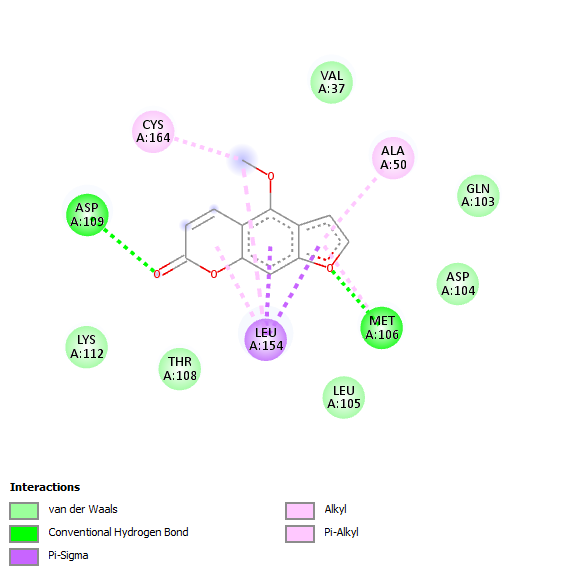 |
|  |  |  | **Imperatorin** | **-6.5** | -- | 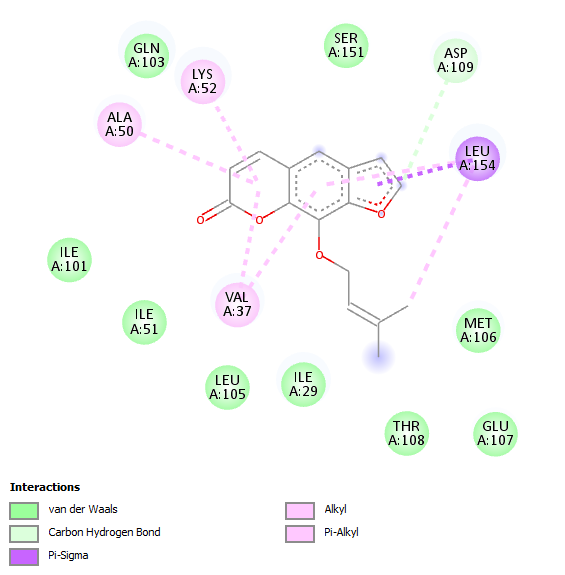 |
|  |  |  | **Marmesin** | **-6.7** | LYS: 52 | 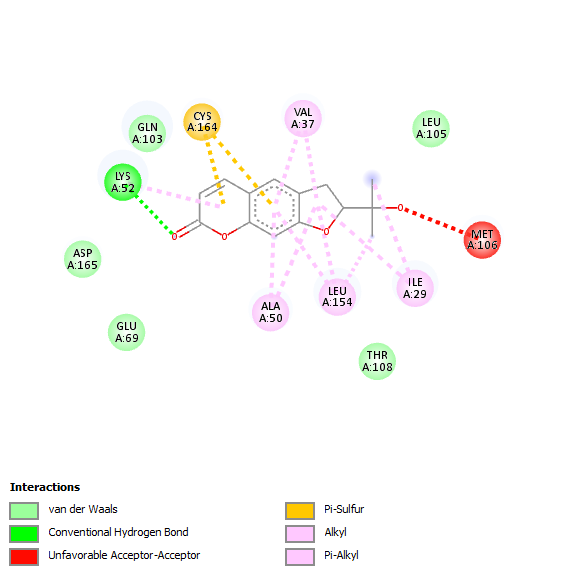 |
|  |  |  | **Nodakenin** | **-8.0** | THR: 108  LYS: 62  GLU: 69 | 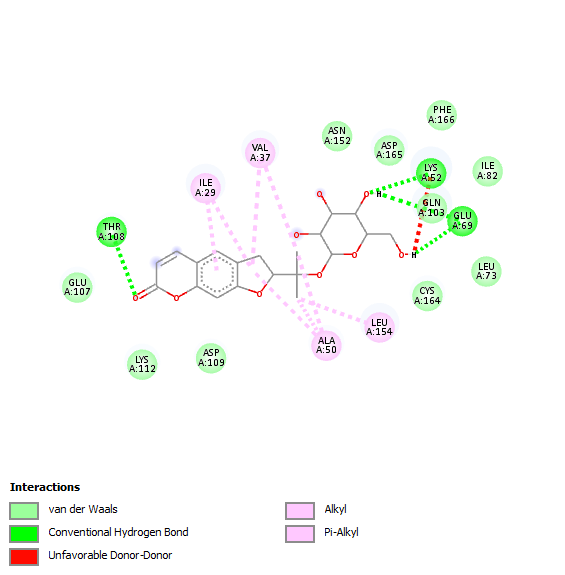 |
| **AKT1** | **7WSW** | center_x = 164.895  center_y = 189.623  center_z = 195.270  size_x = 48  size_y = 66  size_z = 67 | **Aegeline** | **-8.1** | -- | 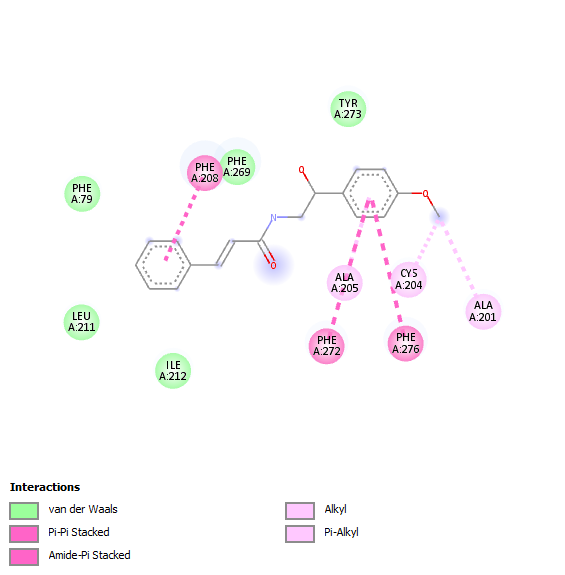 |
|  |  |  | **Auraptene** | **-7.7** | -- | 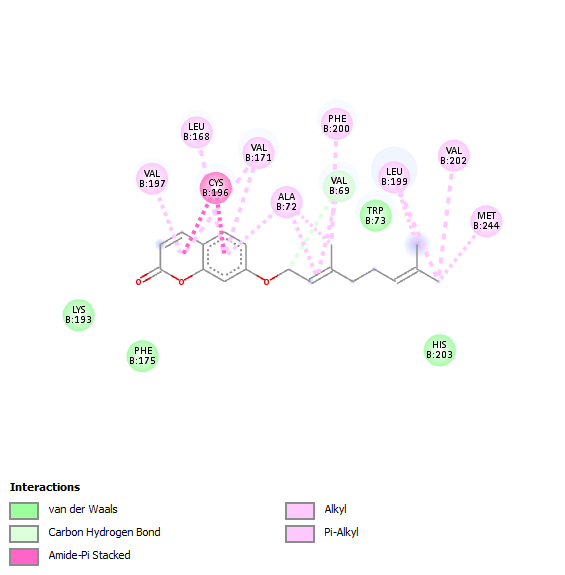 |
|  |  |  | **Bergapten** | **-6.9** | ARG:169  TRP:135 | 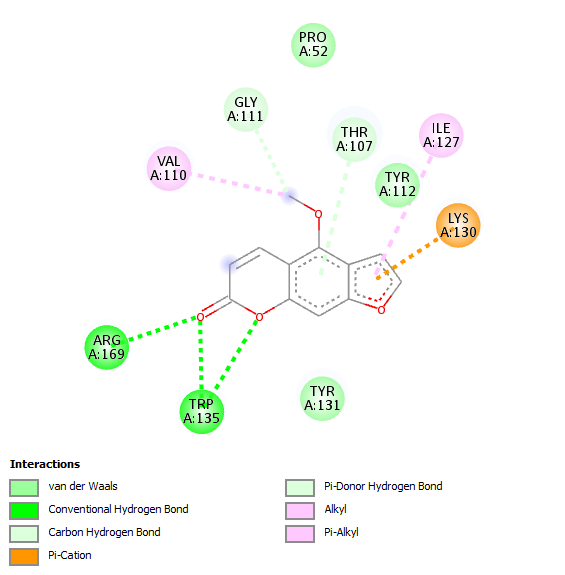 |
|  |  |  | **Imperatorin** | **-7.4** | ARG A:170  ARG A:169  THR:107 | 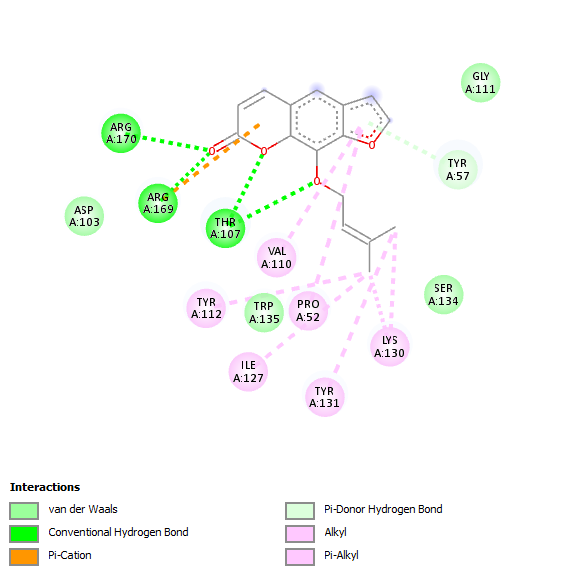 |
|  |  |  | **Marmesin** | **-7.7** | TYR: 240  HIS: 203  TRP: 73 | 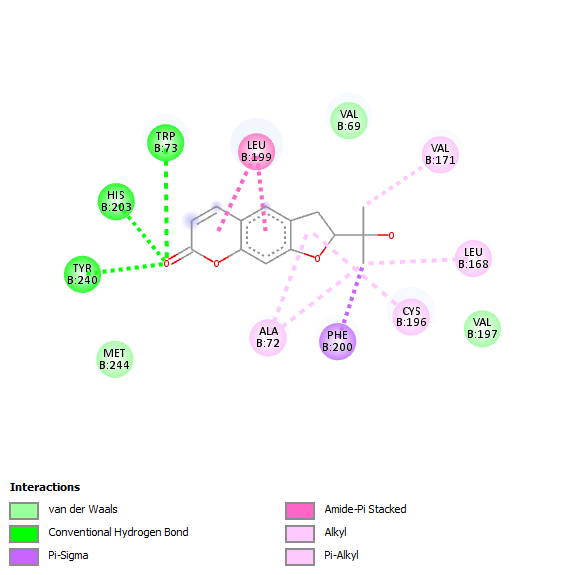 |
|  |  |  | **Nodakenin** | **-8.2** | GLU: 61  ARG: 177  ARG: 58  PRO: 52 | 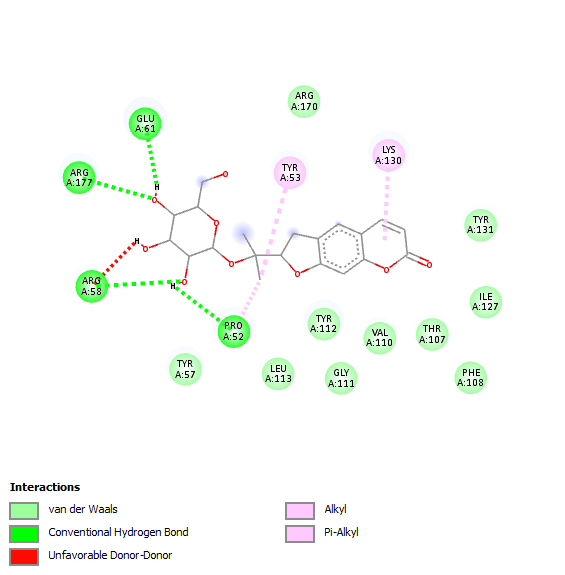 |
