# Supplementary material for: Exploring the bioactives and the mechanism of Aegle marmelos in the treatment of Inflammatory bowel disease through network pharmacology and molecular docking approach
Source: Research Square preprint supplement (doi:10.21203/rs.3.rs-3421028/v1), 2023-10-13
Supplement: Supplementary file 4 [file 7f1fcd70a5dc8ae1958aeb65.xlsx]

## Sheet: ADME of AM Compounds 
Molecules	Canonical SMILES	Formula	MW	Bioavailability Score	Leadlikeness #violations	Lipinski #violations	Ghose #violations	Veber #violations	#Heavy atoms	#Aromatic heavy atoms	Fraction Csp3	#Rotatable bonds	#H-bond acceptors	#H-bond donors	MR	TPSA	iLOGP	XLOGP3	WLOGP	MLOGP	Silicos-IT Log P	Consensus Log P	ESOL Log S	ESOL Solubility (mg/ml)	ESOL Solubility (mol/l)	ESOL Class	Ali Log S	Ali Solubility (mg/ml)	Ali Solubility (mol/l)	Ali Class	Silicos-IT LogSw	Silicos-IT Solubility (mg/ml)	Silicos-IT Solubility (mol/l)	Silicos-IT class	GI absorption	BBB permeant	Pgp substrate	CYP1A2 inhibitor	CYP2C19 inhibitor	CYP2C9 inhibitor	CYP2D6 inhibitor	CYP3A4 inhibitor	log Kp (cm/s)	Egan #violations	Muegge #violations	Bioavailability Score	PAINS #alerts	Brenk #alerts	Synthetic Accessibility
(+)-alpha-Phellandrene	CC1=CC[C@H](C=C1)C(C)C	C10H16	136.23	0.55	1	0	1	0	10	0	0.6	1	0	0	47.12	0	2.64	3.21	3.16	3.27	2.55	2.97	-2.64	0.311	0.00229	Soluble	-2.88	0.179	0.00131	Soluble	-1.78	2.27	0.0167	Soluble	Low	Yes	No	No	No	No	No	No	-4.85	0	2	0.55	0	0	4.15
3-Hydroxycoumarin	O=c1oc2ccccc2cc1O	C9H6O3	162.14	0.55	1	0	1	0	12	10	0	0	3	1	44.51	50.44	1.65	1.76	1.5	1.04	1.97	1.58	-2.57	0.436	0.00269	Soluble	-2.44	0.593	0.00366	Soluble	-3.03	0.153	0.000942	Soluble	High	Yes	No	Yes	No	No	No	No	-6.04	0	1	0.55	0	1	2.66
4-isopropylbenzaldehyde	O=Cc1ccc(cc1)C(C)C	C10H12O	148.2	0.55	1	0	1	0	11	6	0.3	2	1	0	46.41	17.07	2.03	2.37	2.62	2.4	2.96	2.48	-2.52	0.444	0.003	Soluble	-2.37	0.634	0.00428	Soluble	-3.15	0.105	0.000711	Soluble	High	Yes	No	Yes	No	No	No	No	-5.52	0	2	0.55	0	1	1
5-methoxy psoralen /Methoxsalen	COc1c2oc(=O)ccc2cc2c1occ2	C12H8O4	216.19	0.55	1	0	0	0	16	13	0.08	1	4	0	58.75	52.58	2.22	2	2.55	1.18	2.88	2.16	-2.98	0.229	0.00106	Soluble	-2.73	0.402	0.00186	Soluble	-4.63	0.00501	2.32e-05	Moderately soluble	High	Yes	No	Yes	No	No	No	No	-6.2	0	0	0.55	0	1	2.97
Aegeline	COc1ccc(cc1)C(CNC(=O)C=Cc1ccccc1)O	C18H19NO3	297.35	0.55	0	0	0	0	22	12	0.17	7	3	2	86.1	58.56	2.54	2.44	2.12	2.18	3.17	2.49	-3.16	0.205	0.000688	Soluble	-3.31	0.145	0.000486	Soluble	-5	0.00297	9.98e-06	Moderately soluble	High	Yes	No	Yes	No	No	Yes	Yes	-6.38	0	0	0.55	0	1	2.85
Aegelinol	O=c1ccc2c(o1)cc1c(c2)CC(C(O1)(C)C)O	C14H14O4	246.26	0.55	1	0	0	0	18	10	0.36	0	4	1	67.45	59.67	2.2	1.91	1.87	1.6	2.81	2.08	-2.98	0.257	0.00104	Soluble	-2.79	0.403	0.00164	Soluble	-4.14	0.0176	7.16e-05	Moderately soluble	High	Yes	No	Yes	No	No	No	No	-6.45	0	0	0.55	0	1	3.36
Alloimperatorin	CC(=CCc1c2ccc(=O)oc2c(c2c1cco2)O)C	C16H14O4	270.28	0.55	1	0	0	0	20	13	0.19	2	4	1	78	63.58	2.62	3.88	3.75	2.14	3.97	3.27	-4.31	0.0133	4.91e-05	Moderately soluble	-4.91	0.0033	1.22e-05	Moderately soluble	-5.2	0.00173	6.38e-06	Moderately soluble	High	Yes	No	Yes	Yes	Yes	No	No	-5.19	0	0	0.55	0	2	3.2
Alloimperatorin methyl	COc1c2oc(=O)ccc2c(c2c1occ2)CC=C(C)C	C17H16O4	284.31	0.55	1	0	0	0	21	13	0.24	3	4	0	82.47	52.58	3.12	3.93	4.06	2.38	4.5	3.6	-4.34	0.013	4.58e-05	Moderately soluble	-4.73	0.00525	1.85e-05	Moderately soluble	-5.89	0.000364	1.28e-06	Moderately soluble	High	Yes	No	Yes	Yes	Yes	No	No	-5.24	0	0	0.55	0	2	3.27
alloimperatorin methyl ether	COc1c2oc(=O)ccc2c(c2c1occ2)CC=C(C)C	C17H16O4	284.31	0.55	1	0	0	0	21	13	0.24	3	4	0	82.47	52.58	3.12	3.93	4.06	2.38	4.5	3.6	-4.34	0.013	4.58e-05	Moderately soluble	-4.73	0.00525	1.85e-05	Moderately soluble	-5.89	0.000364	1.28e-06	Moderately soluble	High	Yes	No	Yes	Yes	Yes	No	No	-5.24	0	0	0.55	0	2	3.27
Auraptene	CC(=CCOc1ccc2c(c1)oc(=O)cc2)CCC=C(C)C	C19H22O3	298.38	0.55	1	0	0	0	22	10	0.32	6	3	0	91.29	39.44	3.96	5.1	4.86	3.51	5.13	4.51	-4.84	0.00428	1.43e-05	Moderately soluble	-5.67	0.000635	2.13e-06	Moderately soluble	-5.9	0.000378	1.27e-06	Moderately soluble	High	Yes	No	Yes	Yes	Yes	No	No	-4.5	0	1	0.55	0	2	3.43
Bergapten / 5-methoxy psoralen	COc1c2ccc(=O)oc2cc2c1cco2	C12H8O4	216.19	0.55	1	0	0	0	16	13	0.08	1	4	0	58.75	52.58	2.29	1.93	2.55	1.18	2.88	2.16	-2.93	0.253	0.00117	Soluble	-2.66	0.475	0.0022	Soluble	-4.63	0.00501	2.32e-05	Moderately soluble	High	Yes	No	Yes	No	No	No	No	-6.25	0	0	0.55	0	1	2.9
beta-carotene	CC(=CC=CC=C(C=CC=C(C=CC1=C(C)CCCC1(C)C)C)C)C=CC=C(C=CC1=C(C)CCCC1(C)C)C	C40H56	536.87	0.17	3	2	4	0	40	0	0.45	10	0	0	184.43	0	7.79	13.54	12.61	8.96	12.65	11.11	-11.04	4.91e-09	9.15e-12	Insoluble	-13.6	1.34e-11	2.5e-14	Insoluble	-7.59	1.38e-05	2.56e-08	Poorly soluble	Low	No	Yes	No	No	No	No	No	0.04	1	2	0.17	0	1	6.19
beta-Sitosterol	CC[C@@H](C(C)C)CC[C@H]([C@H]1CC[C@@H]2[C@]1(C)CC[C@H]1[C@H]2CC=C2[C@]1(C)CC[C@@H](C2)O)C	C29H50O	414.71	0.55	2	1	3	0	30	0	0.93	6	1	1	133.23	20.23	5.05	9.34	8.02	6.73	7.04	7.24	-7.9	5.23e-06	1.26e-08	Poorly soluble	-9.67	8.9e-08	2.15e-10	Poorly soluble	-6.19	0.000269	6.49e-07	Poorly soluble	Low	No	No	No	No	No	No	No	-2.2	1	2	0.55	0	1	6.3
Citral	O=CC=C(CCC=C(C)C)C	C10H16O	152.23	0.55	1	0	1	0	11	0	0.5	4	1	0	49.44	17.07	2.47	3.03	2.88	2.49	2.65	2.71	-2.43	0.567	0.00373	Soluble	-3.05	0.134	0.000883	Soluble	-1.96	1.66	0.0109	Soluble	High	Yes	No	No	No	No	No	No	-5.08	0	2	0.55	0	3	2.49
citronellal	O=CCC(CCC=C(C)C)C	C10H18O	154.25	0.55	2	0	1	0	11	0	0.7	5	1	0	49.91	17.07	2.49	3.83	2.96	2.59	2.82	2.94	-2.88	0.204	0.00132	Soluble	-3.88	0.0201	0.000131	Soluble	-2.33	0.726	0.00471	Soluble	High	Yes	No	No	No	No	No	No	-4.52	0	2	0.55	0	2	2.57
D- Glucose	OC[C@H]1OC(O)[C@@H]([C@H]([C@@H]1O)O)O	C6H12O6	180.16	0.55	1	0	2	0	12	0	1	1	6	5	35.74	110.38	0.35	-3.24	-3.22	-2.75	-2.3	-2.23	1.15	2550	14.1	Highly soluble	1.49	5610	31.1	Highly soluble	2.62	74200	412	Soluble	Low	No	Yes	No	No	No	No	No	-9.7	0	2	0.55	0	0	4.08
Daucosterol / beta-sitosterol glucoside	CC[C@@H](C(C)C)CC[C@H]([C@H]1CC[C@@H]2[C@]1(C)CC[C@H]1[C@H]2CC=C2[C@]1(C)CC[C@@H](C2)O[C@@H]1O[C@H](CO)[C@H]([C@@H]([C@H]1O)O)O)C	C35H60O6	576.85	0.55	3	1	4	0	41	0	0.94	9	6	4	165.61	99.38	5.17	7.74	5.85	3.96	5.02	5.55	-7.7	1.15e-05	2e-08	Poorly soluble	-9.67	1.23e-07	2.14e-10	Poorly soluble	-4.4	0.0228	3.94e-05	Moderately soluble	Low	No	No	No	No	No	No	No	-4.32	0	1	0.55	0	1	8.02
D-Galactose	OC[C@H]1OC(O)[C@@H]([C@H]([C@H]1O)O)O	C6H12O6	180.16	0.55	1	0	2	0	12	0	1	1	6	5	35.74	110.38	0.73	-3.24	-3.22	-2.75	-2.3	-2.16	1.15	2550	14.1	Highly soluble	1.49	5610	31.1	Highly soluble	2.62	74200	412	Soluble	Low	No	Yes	No	No	No	No	No	-9.7	0	2	0.55	0	0	4.08
D-Galacturonic Acid	OC1O[C@H](C(=O)O)[C@@H]([C@@H]([C@H]1O)O)O	C6H10O7	194.14	0.56	1	0	2	0	13	0	0.83	1	7	5	36.35	127.45	0.46	-2.34	-3.13	-2.89	-2.72	-2.12	0.5	609	3.14	Highly soluble	0.2	308	1.59	Highly soluble	3.07	226000	1160	Soluble	Low	No	Yes	No	No	No	No	No	-9.15	0	2	0.56	0	0	3.94
Dictamnine	COc1c2ccccc2nc2c1cco2	C12H9NO2	199.21	0.55	1	0	0	0	15	13	0.08	1	3	0	58.01	35.26	2.38	2.9	2.99	1.96	2.89	2.63	-3.48	0.0664	0.000333	Soluble	-3.3	0.0996	0.0005	Soluble	-4.72	0.00378	1.9e-05	Moderately soluble	High	Yes	No	Yes	No	No	No	Yes	-5.46	0	1	0.55	0	0	2.48
Dipentene/ Limonene	CC1=CCC(CC1)C(=C)C	C10H16	136.23	0.55	2	0	1	0	10	0	0.6	1	0	0	47.12	0	2.72	4.57	3.31	3.27	2.97	3.37	-3.5	0.0433	0.000318	Soluble	-4.29	0.00693	5.09e-05	Moderately soluble	-2.26	0.754	0.00553	Soluble	Low	Yes	No	No	No	Yes	No	No	-3.89	0	2	0.55	0	1	3.46
Gamma-Fagarine	COc1cccc2c1nc1occc1c2OC	C13H11NO3	229.23	0.55	1	0	0	0	17	13	0.15	2	4	0	64.5	44.49	2.52	2.87	3	1.65	2.88	2.59	-3.5	0.072	0.000314	Soluble	-3.46	0.0788	0.000344	Soluble	-4.85	0.00322	1.4e-05	Moderately soluble	High	Yes	No	Yes	Yes	No	Yes	Yes	-5.66	0	0	0.55	0	0	2.77
Halfordinol	Oc1ccc(cc1)c1cnc(o1)c1cccnc1	C14H10N2O2	238.24	0.55	1	0	0	0	18	17	0	2	4	1	67.19	59.15	2.14	2.24	3.11	1.04	2.92	2.29	-3.3	0.121	0.000507	Soluble	-3.12	0.182	0.000762	Soluble	-5.33	0.00111	4.66e-06	Moderately soluble	High	Yes	Yes	Yes	Yes	No	Yes	Yes	-6.16	0	0	0.55	0	1	2.8
Imperatorin	CC(=CCOc1c2occc2cc2c1oc(=O)cc2)C	C16H14O4	270.28	0.55	0	0	0	0	20	13	0.19	3	4	0	77.5	52.58	3.05	3.5	3.88	2.14	3.99	3.31	-4	0.0268	9.91e-05	Moderately soluble	-4.29	0.0139	5.16e-05	Moderately soluble	-5.51	0.000833	3.08e-06	Moderately soluble	High	Yes	No	Yes	Yes	Yes	No	No	-5.46	0	0	0.55	0	2	3.22
Isoimperatorin	CC(=CCOc1c2ccoc2cc2c1ccc(=O)o2)C	C16H14O4	270.28	0.55	0	0	0	0	20	13	0.19	3	4	0	77.5	52.58	3.07	3.43	3.88	2.14	3.99	3.3	-3.96	0.0297	0.00011	Soluble	-4.21	0.0165	6.1e-05	Moderately soluble	-5.51	0.000833	3.08e-06	Moderately soluble	High	Yes	No	Yes	Yes	Yes	No	No	-5.51	0	0	0.55	0	2	3.24
Isopimpinellin / 5,8-dimethoxy psoralen	COc1c2ccc(=O)oc2c(c2c1cco2)OC	C13H10O5	246.22	0.55	1	0	0	0	18	13	0.15	2	5	0	65.24	61.81	2.49	1.97	2.56	0.89	2.88	2.16	-3.01	0.241	0.000977	Soluble	-2.89	0.315	0.00128	Soluble	-4.76	0.00426	1.73e-05	Moderately soluble	High	Yes	No	Yes	No	No	No	Yes	-6.4	0	0	0.55	0	1	3.22
L-(+)-Arabinose	OC[C@@H]([C@@H]([C@H](C=O)O)O)O	C5H10O5	150.13	0.55	1	0	3	0	10	0	0.8	4	5	4	31	97.99	-0.65	-2.32	-2.74	-2.48	-1.29	-1.9	0.95	1350	9.01	Highly soluble	0.8	944	6.29	Highly soluble	1.94	13000	86.9	Soluble	Low	No	No	No	No	No	No	No	-8.86	0	2	0.55	0	1	2.81
L-Arabinose	O[C@H]1COC([C@@H]([C@H]1O)O)O	C5H10O5	150.13	0.55	1	0	3	0	10	0	1	0	5	4	29.77	90.15	0.59	-3.02	-2.58	-2.32	-1.7	-1.8	1.13	2030	13.5	Highly soluble	1.69	7340	48.9	Highly soluble	2.23	25600	171	Soluble	Low	No	No	No	No	No	No	No	-9.36	0	2	0.55	0	0	3.8
l-ascorbic acid	OCC(C1OC(=O)C(=C1O)O)O	C6H8O6	176.12	0.56	1	0	2	0	12	0	0.5	2	6	4	35.12	107.22	0.39	-1.64	-1.41	-2.6	-1.15	-1.28	0.23	301	1.71	Highly soluble	-0.1	140	0.793	Very soluble	1.49	5460	31	Soluble	High	No	No	No	No	No	No	No	-8.54	0	1	0.56	0	0	3.47
Linoleic acid	CCCCCC=CCC=CCCCCCCCC(=O)O	C18H32O2	280.45	0.85	2	1	1	1	20	0	0.72	14	2	1	89.46	37.3	4.14	6.98	5.88	4.47	5.77	5.45	-5.05	0.00249	8.87e-06	Moderately soluble	-7.58	7.42e-06	2.64e-08	Poorly soluble	-4.67	0.00593	2.11e-05	Moderately soluble	High	Yes	No	Yes	No	Yes	No	No	-3.05	1	1	0.85	0	1	3.1
Linolenic acid	CCC=CCC=CCC=CCCCCCCCC(=O)O	C18H30O2	278.43	0.85	2	1	1	1	20	0	0.61	13	2	1	88.99	37.3	3.36	6.46	5.66	4.38	5.59	5.09	-4.78	0.00464	1.67e-05	Moderately soluble	-7.04	2.55e-05	9.16e-08	Poorly soluble	-3.96	0.0308	0.000111	Soluble	High	Yes	No	Yes	No	Yes	No	No	-3.41	0	1	0.85	0	1	3.03
L-Rhamnose	O[C@H]1[C@H](C)OC([C@@H]([C@@H]1O)O)O	C6H12O5	164.16	0.55	1	0	2	0	11	0	1	0	5	4	34.57	90.15	1.14	-2.09	-2.19	-1.94	-1.72	-1.36	0.46	472	2.88	Highly soluble	0.72	870	5.3	Highly soluble	2.06	19100	116	Soluble	High	No	Yes	No	No	No	No	No	-8.79	0	2	0.55	0	0	4.05
Luvangetin	COc1c2OC(C)(C)C=Cc2cc2c1oc(=O)cc2	C15H14O4	258.27	0.55	0	0	0	0	19	10	0.27	1	4	0	73.1	48.67	2.79	2.8	2.88	2.04	3.33	2.77	-3.53	0.0764	0.000296	Soluble	-3.48	0.0858	0.000332	Soluble	-4.61	0.00637	2.47e-05	Moderately soluble	High	Yes	No	Yes	Yes	No	No	No	-5.89	0	0	0.55	0	1	3.47
Marmeline	OC(c1ccc(cc1)OCC=C(C)C)CNC(=O)C=Cc1ccccc1	C22H25NO3	351.44	0.55	3	0	0	0	26	12	0.23	9	3	2	104.85	58.56	3.71	3.94	3.46	3.01	4.45	3.71	-4.25	0.0198	5.64e-05	Moderately soluble	-4.87	0.00475	1.35e-05	Moderately soluble	-5.85	0.000494	1.41e-06	Moderately soluble	High	Yes	Yes	Yes	Yes	Yes	Yes	Yes	-5.65	0	0	0.55	0	2	3.34
Marmesin /	O=c1ccc2c(o1)cc1c(c2)CC(O1)C(O)(C)C	C14H14O4	246.26	0.55	1	0	0	0	18	10	0.36	1	4	1	67.45	59.67	2.55	1.91	1.87	1.6	2.78	2.14	-2.92	0.299	0.00122	Soluble	-2.79	0.403	0.00164	Soluble	-3.93	0.0292	0.000119	Soluble	High	Yes	No	Yes	No	No	No	No	-6.45	0	0	0.55	0	1	3.35
Marmesinin	OCC1OC(OC(C2Oc3c(C2)cc2c(c3)oc(=O)cc2)(C)C)C(C(C1O)O)O	C20H24O9	408.4	0.55	1	0	0	0	29	10	0.55	4	9	4	99.83	138.82	2.3	0.32	-0.31	-0.56	0.67	0.48	-2.56	1.11	0.00272	Soluble	-2.8	0.65	0.00159	Soluble	-2.23	2.4	0.00587	Soluble	Low	No	No	No	No	No	No	No	-8.56	1	0	0.55	0	1	5.23
Marmin	CC(=CCOc1ccc2c(c1)oc(=O)cc2)CCC(C(O)(C)C)O	C19H24O5	332.39	0.55	0	0	0	0	24	10	0.42	7	5	2	94.13	79.9	3.09	2.81	3.03	1.91	3.78	2.92	-3.52	0.101	0.000304	Soluble	-4.15	0.0238	7.16e-05	Moderately soluble	-4.74	0.00609	1.83e-05	Moderately soluble	High	No	No	No	No	No	No	No	-6.33	0	0	0.55	0	2	4.02
o-(3,3-dimethyl allyl)-halfordinol	CC(=CCOc1ccc(cc1)c1cnc(o1)c1cccnc1)C	C19H18N2O2	306.36	0.55	1	0	0	0	23	17	0.16	5	4	0	90.42	48.15	3.6	4.06	4.75	2.18	4.55	3.83	-4.51	0.00938	3.06e-05	Moderately soluble	-4.78	0.00514	1.68e-05	Moderately soluble	-6.9	3.89e-05	1.27e-07	Poorly soluble	High	Yes	No	Yes	Yes	Yes	Yes	Yes	-5.29	0	0	0.55	0	1	3.21
oleic aicd	CCCCCCCCC=CCCCCCCCC(=O)O	C18H34O2	282.46	0.85	2	1	1	1	20	0	0.83	15	2	1	89.94	37.3	4.27	7.64	6.11	4.57	5.95	5.71	-5.41	0.00109	3.85e-06	Moderately soluble	-8.26	1.54e-06	5.46e-09	Poorly soluble	-5.39	0.00114	4.04e-06	Moderately soluble	High	No	No	Yes	No	Yes	No	No	-2.6	1	1	0.85	0	1	3.07
Palmitic acid	CCCCCCCCCCCCCCCC(=O)O	C16H32O2	256.42	0.85	2	1	0	1	18	0	0.94	14	2	1	80.8	37.3	3.85	7.17	5.55	4.19	5.25	5.2	-5.02	0.00243	9.49e-06	Moderately soluble	-7.77	4.31e-06	1.68e-08	Poorly soluble	-5.31	0.00125	4.88e-06	Moderately soluble	High	Yes	No	Yes	No	Yes	No	No	-2.77	0	1	0.85	0	0	2.31
pectin / beta-D-galacturonic acid	OC1OC(C(=O)O)C(C(C1O)O)O	C6H10O7	194.14	0.56	1	0	2	0	13	0	0.83	1	7	5	36.35	127.45	-0.19	-2.34	-3.13	-2.89	-2.72	-2.25	0.5	609	3.14	Highly soluble	0.2	308	1.59	Highly soluble	3.07	226000	1160	Soluble	Low	No	Yes	No	No	No	No	No	-9.15	0	2	0.56	0	0	3.94
Phytosterols	CCC(C(C)C)CCC(C1CCC2C1(C)CCC1C2CC=C2C1(C)CCC(C2)O)C	C29H50O	414.71	0.55	2	1	3	0	30	0	0.93	6	1	1	133.23	20.23	4.79	9.34	8.02	6.73	7.04	7.19	-7.9	5.23e-06	1.26e-08	Poorly soluble	-9.67	8.9e-08	2.15e-10	Poorly soluble	-6.19	0.000269	6.49e-07	Poorly soluble	Low	No	No	No	No	No	No	No	-2.2	1	2	0.55	0	1	6.3
Psoralen	O=c1ccc2c(o1)cc1c(c2)cco1	C11H6O3	186.16	0.55	1	0	0	0	14	13	0	0	3	0	52.26	43.35	2.01	1.67	2.54	1.48	2.91	2.12	-2.73	0.344	0.00185	Soluble	-2.19	1.19	0.00639	Soluble	-4.5	0.00587	3.16e-05	Moderately soluble	High	Yes	No	Yes	No	No	No	No	-6.25	0	1	0.55	0	1	3.06
Pyridine / o-(3,3-dimethylallyl)-halfordinol	CC(=CCOc1ccc(cc1)c1cnc(o1)c1cccnc1)C	C19H18N2O2	306.36	0.55	1	0	0	0	23	17	0.16	5	4	0	90.42	48.15	3.6	4.06	4.75	2.18	4.55	3.83	-4.51	0.00938	3.06e-05	Moderately soluble	-4.78	0.00514	1.68e-05	Moderately soluble	-6.9	3.89e-05	1.27e-07	Poorly soluble	High	Yes	No	Yes	Yes	Yes	Yes	Yes	-5.29	0	0	0.55	0	1	3.21
Scoparone	COc1cc2oc(=O)ccc2cc1OC	C11H10O4	206.19	0.55	1	0	0	0	15	10	0.18	2	4	0	55.47	48.67	2.23	1.71	1.81	1.05	2.42	1.84	-2.56	0.572	0.00277	Soluble	-2.35	0.926	0.00449	Soluble	-3.87	0.0276	0.000134	Soluble	High	Yes	No	Yes	No	No	No	No	-6.34	0	0	0.55	0	1	2.77
Scopoletin	COc1cc2ccc(=O)oc2cc1O	C10H8O4	192.17	0.55	1	0	0	0	14	10	0.1	1	4	1	51	59.67	1.86	1.53	1.51	0.76	1.94	1.52	-2.46	0.67	0.00348	Soluble	-2.39	0.779	0.00406	Soluble	-3.17	0.131	0.000681	Soluble	High	Yes	No	Yes	No	No	No	No	-6.39	0	1	0.55	0	1	2.62
Skimmin / 7-Hydroxycoumarin glucoside	OCC1OC(Oc2ccc3c(c2)oc(=O)cc3)C(C(C1O)O)O	C15H16O8	324.28	0.55	0	0	1	0	23	10	0.4	3	8	4	76.63	129.59	1.34	-0.7	-1.03	-0.97	-0.25	-0.32	-1.53	9.5	0.0293	Very soluble	-1.55	9.22	0.0284	Very soluble	-1.41	12.6	0.0389	Soluble	High	No	No	No	No	No	No	No	-8.78	0	0	0.55	0	1	4.68
stearic acid	CCCCCCCCCCCCCCCCCC(=O)O	C18H36O2	284.48	0.85	2	1	1	1	20	0	0.94	16	2	1	90.41	37.3	4.3	8.23	6.33	4.67	6.13	5.93	-5.73	0.000526	1.85e-06	Moderately soluble	-8.87	3.8e-07	1.33e-09	Poorly soluble	-6.11	0.000219	7.71e-07	Poorly soluble	High	No	No	Yes	No	No	No	No	-2.19	1	2	0.85	0	0	2.54
Umbelliferone	Oc1ccc2c(c1)oc(=O)cc2	C9H6O3	162.14	0.55	1	0	1	0	12	10	0	0	3	1	44.51	50.44	1.44	1.58	1.5	1.04	1.97	1.51	-2.46	0.566	0.00349	Soluble	-2.25	0.912	0.00562	Soluble	-3.03	0.153	0.000942	Soluble	High	Yes	No	Yes	No	No	No	No	-6.17	0	1	0.55	0	1	2.56
Xanthotoxol / 8-Hydroxypsoralen	O=c1ccc2c(o1)c(O)c1c(c2)cco1	C11H6O4	202.16	0.55	1	0	0	0	15	13	0	0	4	1	54.28	63.58	1.69	1.67	2.24	0.89	2.4	1.78	-2.79	0.33	0.00163	Soluble	-2.62	0.486	0.0024	Soluble	-3.93	0.0237	0.000117	Soluble	High	Yes	No	Yes	No	No	No	No	-6.35	0	0	0.55	0	0	2.94
