# Supplementary material for: Exploring the bioactives and the mechanism of Aegle marmelos in the treatment of Inflammatory bowel disease through network pharmacology and molecular docking approach
Source: Research Square preprint supplement (doi:10.21203/rs.3.rs-3421028/v1), 2023-10-13
Supplement: Supplementary file 5 [file a331a5721a6912f8b651c175.xlsx]

## Sheet: Details of worksheet
Protein-protein interaction (PPI) by STRING database and Cytoscape 3.10.0 was used for the network construction and analysis
Worksheet Name	Details
AM_Targets_PPI	PPI of all the hub targets of AM extracted from STRING (Confidence >0.9, highest confidence)
AM_Targets_Degree	Analysis of the PPI using Cytoscape (degree, closeness, betweeness)
MCODE Clusters	Details of the 5 clusters extracted using MCODE plugin of Cytoscape

## Sheet: AM_Targets_PPI
#node1	node2	node1_string_id	node2_string_id	neighborhood_on_chromosome	gene_fusion	phylogenetic_cooccurrence	homology	coexpression	experimentally_determined_interaction	database_annotated	automated_textmining	combined_score
ABL1	PLCG1	9606.ENSP00000361423	9606.ENSP00000244007	0	0	0	0.54	0.097	0.517	0.9	0.467	0.962
ABL1	MDM2	9606.ENSP00000361423	9606.ENSP00000258149	0	0	0	0	0	0.68	0.9	0.759	0.991
ABL1	PDGFRB	9606.ENSP00000361423	9606.ENSP00000261799	0	0	0	0.579	0.089	0.331	0.9	0.683	0.952
ABL1	CDK2	9606.ENSP00000361423	9606.ENSP00000266970	0	0	0	0.658	0.085	0.102	0.9	0.502	0.925
ABL1	TERT	9606.ENSP00000361423	9606.ENSP00000309572	0	0	0	0	0.049	0.213	0.9	0.453	0.953
ABL1	HSP90AA1	9606.ENSP00000361423	9606.ENSP00000335153	0	0	0	0	0	0.829	0	0.856	0.974
ABL1	PTPN1	9606.ENSP00000361423	9606.ENSP00000360683	0	0	0	0	0.062	0.426	0.9	0.308	0.957
ABL1	YES1	9606.ENSP00000361423	9606.ENSP00000462468	0	0	0	0.883	0	0	0.9	0.513	0.905
ABL1	LYN	9606.ENSP00000361423	9606.ENSP00000428924	0	0	0	0.881	0	0	0.9	0.722	0.908
ABL1	MAPK8	9606.ENSP00000361423	9606.ENSP00000378974	0	0	0	0.58	0	0.101	0.9	0.344	0.918
ABL1	HDAC1	9606.ENSP00000361423	9606.ENSP00000362649	0	0	0	0	0	0.078	0.9	0.351	0.934
ABL1	SRC	9606.ENSP00000361423	9606.ENSP00000362680	0	0	0	0.882	0.067	0.675	0.9	0.861	0.97
AKT1	RPS6KB1	9606.ENSP00000451828	9606.ENSP00000225577	0	0	0.383	0.856	0.183	0.764	0.9	0.938	0.982
AKT1	NFKB1	9606.ENSP00000451828	9606.ENSP00000226574	0	0	0	0	0.066	0.176	0.9	0.526	0.958
AKT1	IL2	9606.ENSP00000451828	9606.ENSP00000226730	0	0	0	0	0	0	0.9	0.682	0.966
AKT1	GAPDH	9606.ENSP00000451828	9606.ENSP00000229239	0	0	0	0	0.046	0.349	0	0.871	0.913
AKT1	MAPK14	9606.ENSP00000451828	9606.ENSP00000229795	0	0	0.303	0.623	0.083	0.83	0.6	0.769	0.956
AKT1	RARA	9606.ENSP00000451828	9606.ENSP00000254066	0	0	0	0	0.088	0.505	0.9	0.38	0.968
AKT1	MDM2	9606.ENSP00000451828	9606.ENSP00000258149	0	0	0	0	0	0.898	0.9	0.852	0.998
AKT1	PDGFRB	9606.ENSP00000451828	9606.ENSP00000261799	0	0	0	0.554	0.062	0.122	0.9	0.691	0.937
AKT1	CREBBP	9606.ENSP00000451828	9606.ENSP00000262367	0	0	0	0	0	0.528	0.9	0.576	0.978
AKT1	MAPK3	9606.ENSP00000451828	9606.ENSP00000263025	0	0	0.323	0.586	0.066	0.148	0.8	0.938	0.906
AKT1	PIK3CA	9606.ENSP00000451828	9606.ENSP00000263967	0	0	0	0	0.064	0.88	0.9	0.903	0.998
AKT1	PAK1	9606.ENSP00000451828	9606.ENSP00000278568	0	0	0.386	0.646	0.064	0.79	0.9	0.947	0.987
AKT1	PIK3CB	9606.ENSP00000451828	9606.ENSP00000289153	0	0	0	0	0.064	0.395	0.9	0.894	0.993
AKT1	S1PR1	9606.ENSP00000451828	9606.ENSP00000305416	0	0	0	0	0	0.226	0.9	0.575	0.964
AKT1	TERT	9606.ENSP00000451828	9606.ENSP00000309572	0	0	0	0	0.055	0.723	0.9	0.769	0.993
AKT1	CASP3	9606.ENSP00000451828	9606.ENSP00000311032	0	0	0	0	0	0.475	0	0.882	0.935
AKT1	HSPA5	9606.ENSP00000451828	9606.ENSP00000324173	0	0	0	0	0	0.531	0	0.983	0.992
AKT1	NOS2	9606.ENSP00000451828	9606.ENSP00000327251	0	0	0	0	0.063	0.077	0.9	0.646	0.965
AKT1	RARB	9606.ENSP00000451828	9606.ENSP00000332296	0	0	0	0	0	0.077	0.9	0.222	0.921
AKT1	HSP90AA1	9606.ENSP00000451828	9606.ENSP00000335153	0	0	0	0	0.062	0.946	0.9	0.991	0.999
AKT1	PTPN11	9606.ENSP00000451828	9606.ENSP00000340944	0	0	0	0	0.09	0.138	0.9	0.752	0.978
AKT1	JAK1	9606.ENSP00000451828	9606.ENSP00000343204	0	0	0	0.571	0.062	0	0.9	0.706	0.931
AKT1	MTOR	9606.ENSP00000451828	9606.ENSP00000354558	0	0	0	0	0.081	0.904	0.9	0.991	0.999
AKT1	HSP90AB1	9606.ENSP00000451828	9606.ENSP00000360609	0	0	0	0	0.062	0.819	0.6	0.78	0.983
AKT1	PTPN1	9606.ENSP00000451828	9606.ENSP00000360683	0	0	0	0	0.091	0.284	0.9	0.672	0.975
AKT1	SRC	9606.ENSP00000451828	9606.ENSP00000362680	0	0	0.391	0.562	0.098	0.683	0.9	0.986	0.985
AKT1	RXRB	9606.ENSP00000451828	9606.ENSP00000363817	0	0	0	0	0.07	0.077	0.9	0.102	0.912
AKT1	AR	9606.ENSP00000451828	9606.ENSP00000363822	0	0	0	0	0	0.87	0	0.847	0.979
AKT1	BCL2	9606.ENSP00000451828	9606.ENSP00000381185	0	0	0	0	0.062	0	0.9	0.457	0.944
AKT1	RARG	9606.ENSP00000451828	9606.ENSP00000388510	0	0	0	0	0.065	0.077	0.9	0.188	0.92
AKT1	JAK3	9606.ENSP00000451828	9606.ENSP00000391676	0	0	0	0.584	0.049	0	0.9	0.623	0.925
AKT1	ESR1	9606.ENSP00000451828	9606.ENSP00000405330	0	0	0	0	0.055	0.297	0.9	0.805	0.985
AKT1	RXRA	9606.ENSP00000451828	9606.ENSP00000419692	0	0	0	0	0.082	0.077	0.9	0.322	0.934
AKT1	IKBKB	9606.ENSP00000451828	9606.ENSP00000430684	0	0	0	0.601	0	0.784	0.9	0.716	0.983
AR	MAPK14	9606.ENSP00000363822	9606.ENSP00000229795	0	0	0	0	0	0.104	0.9	0.289	0.93
AR	NR3C1	9606.ENSP00000363822	9606.ENSP00000231509	0	0	0	0.816	0	0.213	0.9	0.834	0.93
AR	MDM2	9606.ENSP00000363822	9606.ENSP00000258149	0	0	0	0	0	0.898	0	0.988	0.998
AR	CREBBP	9606.ENSP00000363822	9606.ENSP00000262367	0	0	0	0	0	0.788	0.9	0.636	0.991
AR	PIK3CA	9606.ENSP00000363822	9606.ENSP00000263967	0	0	0	0	0	0.061	0.9	0.52	0.95
AR	EGFR	9606.ENSP00000363822	9606.ENSP00000275493	0	0	0	0	0.063	0.698	0	0.966	0.989
AR	HSP90AA1	9606.ENSP00000363822	9606.ENSP00000335153	0	0	0	0	0	0.884	0.9	0.989	0.999
AR	CASP8	9606.ENSP00000363822	9606.ENSP00000351273	0	0	0	0	0	0.345	0.9	0.614	0.972
AR	HSP90AB1	9606.ENSP00000363822	9606.ENSP00000360609	0	0	0	0	0	0.285	0.8	0.672	0.949
AR	HDAC1	9606.ENSP00000363822	9606.ENSP00000362649	0	0	0	0	0	0.762	0	0.833	0.958
AR	SRC	9606.ENSP00000363822	9606.ENSP00000362680	0	0	0	0	0	0.839	0.9	0.989	0.999
AR	HSPA1A	9606.ENSP00000363822	9606.ENSP00000364802	0	0	0	0	0	0.498	0.65	0.532	0.91
AR	MAPK8	9606.ENSP00000363822	9606.ENSP00000378974	0	0	0	0	0	0	0.9	0.285	0.925
BCL2	MAPK1	9606.ENSP00000381185	9606.ENSP00000215832	0	0	0	0	0	0.462	0.9	0.222	0.954
BCL2	CREBBP	9606.ENSP00000381185	9606.ENSP00000262367	0	0	0	0	0	0	0.9	0.074	0.903
BCL2	MAPK3	9606.ENSP00000381185	9606.ENSP00000263025	0	0	0	0	0	0.213	0.9	0.297	0.939
BCL2	JAK1	9606.ENSP00000381185	9606.ENSP00000343204	0	0	0	0	0	0	0.9	0.121	0.908
BCL2	RXRB	9606.ENSP00000381185	9606.ENSP00000363817	0	0	0	0	0.062	0.057	0.9	0	0.903
BCL2	MAPK8	9606.ENSP00000381185	9606.ENSP00000378974	0	0	0	0	0	0.471	0.9	0.258	0.957
BCL2	JAK3	9606.ENSP00000381185	9606.ENSP00000391676	0	0	0	0	0	0	0.9	0.046	0.9
BCL2	RXRA	9606.ENSP00000381185	9606.ENSP00000419692	0	0	0	0	0	0.057	0.9	0	0.901
BCL2	ESR1	9606.ENSP00000381185	9606.ENSP00000405330	0	0	0	0	0.069	0.057	0.9	0.244	0.924
BTK	PLCG1	9606.ENSP00000483570	9606.ENSP00000244007	0	0	0	0.546	0.063	0.258	0.9	0.576	0.943
BTK	PIK3CA	9606.ENSP00000483570	9606.ENSP00000263967	0	0	0	0	0.062	0.104	0.9	0.463	0.948
BTK	PIK3CB	9606.ENSP00000483570	9606.ENSP00000289153	0	0	0	0	0.062	0.104	0.9	0.462	0.948
BTK	SRC	9606.ENSP00000483570	9606.ENSP00000362680	0	0	0	0.85	0.062	0.347	0.9	0.77	0.941
BTK	SYK	9606.ENSP00000483570	9606.ENSP00000364907	0	0	0	0.656	0.305	0.462	0.9	0.984	0.973
BTK	JAK2	9606.ENSP00000483570	9606.ENSP00000371067	0	0	0	0.618	0.1	0	0.9	0.503	0.923
BTK	MAPK8	9606.ENSP00000483570	9606.ENSP00000378974	0	0	0	0.568	0.062	0.143	0.9	0.315	0.923
BTK	PTPN6	9606.ENSP00000483570	9606.ENSP00000391592	0	0	0	0	0.344	0.078	0.9	0.393	0.958
BTK	LYN	9606.ENSP00000483570	9606.ENSP00000428924	0	0	0	0.862	0.17	0.462	0.9	0.869	0.957
BTK	YES1	9606.ENSP00000483570	9606.ENSP00000462468	0	0	0	0.846	0.066	0.347	0.9	0.406	0.937
CASP3	MAPK1	9606.ENSP00000311032	9606.ENSP00000215832	0	0	0	0	0.048	0.057	0.8	0.578	0.914
CASP3	MAPK14	9606.ENSP00000311032	9606.ENSP00000229795	0	0	0	0	0.061	0.282	0.9	0.709	0.977
CASP3	MDM2	9606.ENSP00000311032	9606.ENSP00000258149	0	0	0	0	0.063	0.875	0	0.73	0.965
CASP3	MAPK3	9606.ENSP00000311032	9606.ENSP00000263025	0	0	0	0	0	0.057	0.8	0.821	0.963
CASP3	PAK1	9606.ENSP00000311032	9606.ENSP00000278568	0	0	0	0	0.055	0	0.9	0.241	0.922
CASP3	PTK2	9606.ENSP00000311032	9606.ENSP00000341189	0	0	0	0	0	0	0.9	0.558	0.953
CASP3	CASP8	9606.ENSP00000311032	9606.ENSP00000351273	0	0	0	0.835	0.062	0.768	0.9	0.96	0.98
CASP8	MAPK1	9606.ENSP00000351273	9606.ENSP00000215832	0	0	0	0	0	0.282	0.9	0.532	0.963
CASP8	NFKB1	9606.ENSP00000351273	9606.ENSP00000226574	0	0	0	0	0.062	0.09	0.9	0.443	0.946
CASP8	MAPK3	9606.ENSP00000351273	9606.ENSP00000263025	0	0	0	0	0	0.282	0.9	0.746	0.98
CASP8	IKBKB	9606.ENSP00000351273	9606.ENSP00000430684	0	0	0	0	0.062	0.317	0.9	0.579	0.969
CASP8	SRC	9606.ENSP00000351273	9606.ENSP00000362680	0	0	0	0	0	0.497	0	0.964	0.981
CASP8	TNF	9606.ENSP00000351273	9606.ENSP00000398698	0	0	0	0	0.062	0.282	0.9	0.868	0.989
CDK1	MDM2	9606.ENSP00000378699	9606.ENSP00000258149	0	0	0	0	0	0	0.9	0.664	0.965
CDK1	CDK2	9606.ENSP00000378699	9606.ENSP00000266970	0	0	0.441	0.968	0.68	0.617	0.9	0.978	0.987
CDK1	MAP2K1	9606.ENSP00000378699	9606.ENSP00000302486	0	0	0.34	0.697	0.065	0.103	0.9	0.515	0.929
CDK1	HSP90AA1	9606.ENSP00000378699	9606.ENSP00000335153	0	0	0	0	0.087	0.428	0	0.869	0.926
CDK1	HDAC1	9606.ENSP00000378699	9606.ENSP00000362649	0	0	0	0	0.134	0.104	0.9	0.606	0.965
CDK1	SRC	9606.ENSP00000378699	9606.ENSP00000362680	0	0	0.259	0.648	0.062	0.285	0.9	0.769	0.95
CDK1	RXRA	9606.ENSP00000378699	9606.ENSP00000419692	0	0	0	0	0	0.057	0.9	0.099	0.907
CDK2	MAPK1	9606.ENSP00000266970	9606.ENSP00000215832	0	0	0.399	0.863	0.049	0.235	0.9	0.615	0.931
CDK2	MDM2	9606.ENSP00000266970	9606.ENSP00000258149	0	0	0	0	0.051	0	0.9	0.727	0.971
CDK2	MAPK3	9606.ENSP00000266970	9606.ENSP00000263025	0	0	0.405	0.872	0.049	0.235	0.9	0.664	0.931
CDK2	TERT	9606.ENSP00000266970	9606.ENSP00000309572	0	0.002	0	0	0.076	0	0.9	0.477	0.947
CDK2	HDAC1	9606.ENSP00000266970	9606.ENSP00000362649	0	0	0	0	0.133	0.104	0.9	0.517	0.957
CREBBP	NFKB1	9606.ENSP00000262367	9606.ENSP00000226574	0	0	0	0	0.047	0.06	0.9	0.696	0.969
CREBBP	MAPK14	9606.ENSP00000262367	9606.ENSP00000229795	0	0	0	0	0	0.114	0.9	0.347	0.937
CREBBP	NR3C1	9606.ENSP00000262367	9606.ENSP00000231509	0	0	0	0	0.062	0.845	0.9	0.617	0.993
CREBBP	RARA	9606.ENSP00000262367	9606.ENSP00000254066	0	0	0	0	0	0.518	0.9	0.504	0.974
CREBBP	MDM2	9606.ENSP00000262367	9606.ENSP00000258149	0	0	0	0	0	0.866	0.9	0.856	0.997
CREBBP	SRC	9606.ENSP00000262367	9606.ENSP00000362680	0	0	0	0	0.063	0.528	0	0.791	0.9
CREBBP	RARB	9606.ENSP00000262367	9606.ENSP00000332296	0	0	0	0	0	0.102	0.9	0.135	0.915
CREBBP	HSPA1A	9606.ENSP00000262367	9606.ENSP00000364802	0	0	0	0	0	0.056	0.9	0.188	0.916
CREBBP	RARG	9606.ENSP00000262367	9606.ENSP00000388510	0	0	0	0	0	0.102	0.9	0.141	0.916
CREBBP	HSPA8	9606.ENSP00000262367	9606.ENSP00000432083	0	0	0	0	0	0.281	0.9	0.137	0.932
CREBBP	HSF1	9606.ENSP00000262367	9606.ENSP00000431512	0	0	0	0	0.071	0.303	0.9	0.281	0.947
CREBBP	VEGFA	9606.ENSP00000262367	9606.ENSP00000478570	0	0	0	0	0	0.317	0.9	0.326	0.95
CREBBP	TNF	9606.ENSP00000262367	9606.ENSP00000398698	0	0	0	0	0	0	0.9	0.553	0.953
CREBBP	HDAC3	9606.ENSP00000262367	9606.ENSP00000302967	0	0	0	0	0.071	0.376	0.9	0.518	0.968
CREBBP	PPARA	9606.ENSP00000262367	9606.ENSP00000385523	0	0	0	0	0	0.355	0.9	0.62	0.973
CREBBP	RXRA	9606.ENSP00000262367	9606.ENSP00000419692	0	0	0	0	0.105	0.812	0.9	0.3	0.986
CREBBP	HDAC1	9606.ENSP00000262367	9606.ENSP00000362649	0	0	0	0	0.13	0.58	0.9	0.693	0.987
CREBBP	ESR1	9606.ENSP00000262367	9606.ENSP00000405330	0	0	0	0	0	0.878	0.9	0.871	0.998
CREBBP	PPARG	9606.ENSP00000262367	9606.ENSP00000287820	0	0	0	0	0	0.974	0.9	0.931	0.999
EGFR	MAPK1	9606.ENSP00000275493	9606.ENSP00000215832	0	0	0	0.577	0	0.44	0.9	0.832	0.962
EGFR	GAPDH	9606.ENSP00000275493	9606.ENSP00000229239	0	0	0	0	0	0.846	0	0.721	0.955
EGFR	PLCG1	9606.ENSP00000275493	9606.ENSP00000244007	0	0	0	0	0.062	0.919	0.9	0.95	0.999
EGFR	PDGFRB	9606.ENSP00000275493	9606.ENSP00000261799	0	0	0	0.56	0.105	0.541	0.8	0.917	0.946
EGFR	MAPK3	9606.ENSP00000275493	9606.ENSP00000263025	0	0	0	0.58	0	0.413	0.9	0.859	0.96
EGFR	PIK3CA	9606.ENSP00000275493	9606.ENSP00000263967	0	0	0	0	0	0.741	0.9	0.875	0.996
EGFR	ERBB2	9606.ENSP00000275493	9606.ENSP00000269571	0	0	0	0.941	0.077	0.982	0.9	0.99	0.998
EGFR	PRKCB	9606.ENSP00000275493	9606.ENSP00000305355	0	0	0	0.553	0.049	0.282	0.9	0.325	0.935
EGFR	HSPA8	9606.ENSP00000275493	9606.ENSP00000432083	0	0	0	0	0	0.878	0	0.55	0.942
EGFR	VEGFA	9606.ENSP00000275493	9606.ENSP00000478570	0	0	0	0	0.089	0	0.6	0.861	0.944
EGFR	MET	9606.ENSP00000275493	9606.ENSP00000317272	0	0	0	0.58	0.23	0.887	0	0.988	0.946
EGFR	JAK1	9606.ENSP00000275493	9606.ENSP00000343204	0	0	0	0.569	0	0.32	0.9	0.681	0.949
EGFR	PTPN6	9606.ENSP00000275493	9606.ENSP00000391592	0	0	0	0	0	0.79	0	0.833	0.963
EGFR	HSP90AB1	9606.ENSP00000275493	9606.ENSP00000360609	0	0	0	0	0	0.89	0	0.699	0.965
EGFR	PIK3CB	9606.ENSP00000275493	9606.ENSP00000289153	0	0	0	0	0	0.326	0.9	0.54	0.966
EGFR	PTK2	9606.ENSP00000275493	9606.ENSP00000341189	0	0	0	0.597	0.108	0.79	0.8	0.859	0.973
EGFR	JAK2	9606.ENSP00000275493	9606.ENSP00000371067	0	0	0	0.573	0	0.807	0.8	0.858	0.974
EGFR	YES1	9606.ENSP00000275493	9606.ENSP00000462468	0	0	0	0.661	0.098	0.698	0.9	0.651	0.976
EGFR	ERBB4	9606.ENSP00000275493	9606.ENSP00000342235	0	0	0	0.946	0.062	0.757	0.9	0.99	0.976
EGFR	MTOR	9606.ENSP00000275493	9606.ENSP00000354558	0	0	0	0	0.062	0.197	0.9	0.751	0.978
EGFR	PTK2B	9606.ENSP00000275493	9606.ENSP00000380638	0	0	0	0.603	0.064	0.718	0.9	0.845	0.98
EGFR	PRKCA	9606.ENSP00000275493	9606.ENSP00000408695	0	0	0	0.557	0.049	0.751	0.9	0.639	0.981
EGFR	LYN	9606.ENSP00000275493	9606.ENSP00000428924	0	0	0	0.679	0	0.773	0.9	0.642	0.981
EGFR	PTPN2	9606.ENSP00000275493	9606.ENSP00000311857	0	0	0	0	0	0.714	0.9	0.509	0.984
EGFR	HSPA5	9606.ENSP00000275493	9606.ENSP00000324173	0	0	0	0	0	0.682	0	0.955	0.985
EGFR	SRC	9606.ENSP00000275493	9606.ENSP00000362680	0	0	0	0.671	0	0.931	0.9	0.99	0.995
EGFR	ESR1	9606.ENSP00000275493	9606.ENSP00000405330	0	0	0	0	0	0.696	0	0.988	0.996
EGFR	PTPN1	9606.ENSP00000275493	9606.ENSP00000360683	0	0	0	0	0	0.893	0.9	0.988	0.999
EGFR	PTPN11	9606.ENSP00000275493	9606.ENSP00000340944	0	0	0	0	0	0.941	0.9	0.986	0.999
EGFR	HSP90AA1	9606.ENSP00000275493	9606.ENSP00000335153	0	0	0	0	0	0.884	0.9	0.989	0.999
ERBB2	PLCG1	9606.ENSP00000269571	9606.ENSP00000244007	0	0	0	0	0.062	0.757	0.8	0.791	0.989
ERBB2	PIK3CA	9606.ENSP00000269571	9606.ENSP00000263967	0	0	0	0	0	0.12	0.9	0.875	0.988
ERBB2	VEGFA	9606.ENSP00000269571	9606.ENSP00000478570	0	0	0	0	0	0	0.6	0.805	0.918
ERBB2	HSP90AB1	9606.ENSP00000269571	9606.ENSP00000360609	0	0	0	0	0	0.713	0	0.769	0.931
ERBB2	ESR1	9606.ENSP00000269571	9606.ENSP00000405330	0	0	0	0	0	0.316	0	0.918	0.941
ERBB2	YES1	9606.ENSP00000269571	9606.ENSP00000462468	0	0	0	0.673	0.079	0.341	0.9	0.462	0.943
ERBB2	MAPK8	9606.ENSP00000269571	9606.ENSP00000378974	0	0	0	0	0	0	0.9	0.464	0.944
ERBB2	MAP2K1	9606.ENSP00000269571	9606.ENSP00000302486	0	0	0	0.61	0	0.285	0.9	0.767	0.947
ERBB2	JAK2	9606.ENSP00000269571	9606.ENSP00000371067	0	0	0	0.57	0	0.32	0.9	0.798	0.953
ERBB2	PIK3CB	9606.ENSP00000269571	9606.ENSP00000289153	0	0	0	0	0	0.12	0.9	0.638	0.965
ERBB2	IL6	9606.ENSP00000269571	9606.ENSP00000385675	0	0	0	0	0	0	0.9	0.673	0.965
ERBB2	PTK2	9606.ENSP00000269571	9606.ENSP00000341189	0	0	0	0.598	0.072	0.798	0.8	0.706	0.97
ERBB2	SRC	9606.ENSP00000269571	9606.ENSP00000362680	0	0	0	0.686	0.062	0.897	0.8	0.99	0.985
ERBB2	ERBB4	9606.ENSP00000269571	9606.ENSP00000342235	0	0	0	0.93	0.062	0.873	0.9	0.99	0.987
ERBB2	PTPN11	9606.ENSP00000269571	9606.ENSP00000340944	0	0	0	0	0	0.939	0.9	0.795	0.998
ERBB2	HSP90AA1	9606.ENSP00000269571	9606.ENSP00000335153	0	0	0	0	0	0.907	0.9	0.989	0.999
ERBB4	MAPK1	9606.ENSP00000342235	9606.ENSP00000215832	0	0	0	0.583	0	0.318	0.9	0.521	0.943
ERBB4	PLCG1	9606.ENSP00000342235	9606.ENSP00000244007	0	0	0	0	0.062	0.365	0.65	0.582	0.901
ERBB4	MDM2	9606.ENSP00000342235	9606.ENSP00000258149	0	0	0	0	0	0.27	0.9	0.376	0.95
ERBB4	MAPK3	9606.ENSP00000342235	9606.ENSP00000263025	0	0	0	0.572	0	0.318	0.9	0.667	0.948
ERBB4	PIK3CA	9606.ENSP00000342235	9606.ENSP00000263967	0	0	0	0	0	0.058	0.9	0.682	0.967
ERBB4	PIK3CB	9606.ENSP00000342235	9606.ENSP00000289153	0	0	0	0	0	0.058	0.9	0.29	0.927
ERBB4	PRKCB	9606.ENSP00000342235	9606.ENSP00000305355	0	0	0	0.553	0.049	0.057	0.9	0.173	0.908
ERBB4	HSP90AA1	9606.ENSP00000342235	9606.ENSP00000335153	0	0	0	0	0	0.45	0.9	0.54	0.972
ERBB4	PTPN11	9606.ENSP00000342235	9606.ENSP00000340944	0	0	0	0	0	0.841	0	0.551	0.925
ERBB4	PRKCA	9606.ENSP00000342235	9606.ENSP00000408695	0	0	0	0.559	0.049	0.057	0.9	0.238	0.911
ERBB4	JAK2	9606.ENSP00000342235	9606.ENSP00000371067	0	0	0	0.576	0	0.107	0.9	0.519	0.926
ERBB4	YES1	9606.ENSP00000342235	9606.ENSP00000462468	0	0	0	0.679	0	0.359	0.9	0.366	0.94
ERBB4	ESR1	9606.ENSP00000342235	9606.ENSP00000405330	0	0	0	0	0	0.316	0.5	0.951	0.982
ESR1	MAPK1	9606.ENSP00000405330	9606.ENSP00000215832	0	0	0	0	0	0.699	0.9	0.532	0.984
ESR1	RPS6KB1	9606.ENSP00000405330	9606.ENSP00000225577	0	0	0	0	0	0.068	0.8	0.525	0.903
ESR1	GAPDH	9606.ENSP00000405330	9606.ENSP00000229239	0	0	0	0	0	0.058	0.9	0.692	0.968
ESR1	MAPK14	9606.ENSP00000405330	9606.ENSP00000229795	0	0	0	0	0	0.264	0.9	0.458	0.956
ESR1	NR3C1	9606.ENSP00000405330	9606.ENSP00000231509	0	0	0	0.66	0	0	0.9	0.89	0.93
ESR1	NR0B2	9606.ENSP00000405330	9606.ENSP00000254227	0	0	0	0	0.06	0.501	0.9	0.638	0.98
ESR1	MDM2	9606.ENSP00000405330	9606.ENSP00000258149	0	0	0	0	0	0.757	0	0.81	0.952
ESR1	MAPK3	9606.ENSP00000405330	9606.ENSP00000263025	0	0	0	0	0	0.264	0.9	0.683	0.974
ESR1	PIK3CA	9606.ENSP00000405330	9606.ENSP00000263967	0	0	0	0	0	0.496	0.9	0.685	0.982
ESR1	IGF1R	9606.ENSP00000405330	9606.ENSP00000268035	0	0	0	0	0	0.774	0.9	0.989	0.999
ESR1	TERT	9606.ENSP00000405330	9606.ENSP00000309572	0	0	0	0	0	0	0.9	0.518	0.949
ESR1	HSP90AA1	9606.ENSP00000405330	9606.ENSP00000335153	0	0	0	0	0	0.887	0.6	0.989	0.999
ESR1	PTPN11	9606.ENSP00000405330	9606.ENSP00000340944	0	0	0	0	0	0.103	0	0.893	0.9
ESR1	HSP90AB1	9606.ENSP00000405330	9606.ENSP00000360609	0	0	0	0	0	0.591	0.6	0.705	0.947
ESR1	HDAC1	9606.ENSP00000405330	9606.ENSP00000362649	0	0	0	0	0	0.876	0.9	0.987	0.999
ESR1	SRC	9606.ENSP00000405330	9606.ENSP00000362680	0	0	0	0	0.05	0.921	0.9	0.989	0.999
ESR1	HSPA8	9606.ENSP00000405330	9606.ENSP00000432083	0	0	0	0	0	0.88	0	0.526	0.94
FGF2	MAPK1	9606.ENSP00000264498	9606.ENSP00000215832	0	0	0	0	0	0	0.9	0.444	0.942
FGF2	MMP2	9606.ENSP00000264498	9606.ENSP00000219070	0	0	0	0	0.088	0	0.9	0.691	0.969
FGF2	MAPK3	9606.ENSP00000264498	9606.ENSP00000263025	0	0	0	0	0	0	0.9	0.693	0.968
FGF2	KDR	9606.ENSP00000264498	9606.ENSP00000263923	0	0	0	0	0.069	0.183	0.6	0.819	0.937
FGF2	MMP1	9606.ENSP00000264498	9606.ENSP00000322788	0	0	0	0	0	0	0.9	0.61	0.959
FGF2	MMP9	9606.ENSP00000264498	9606.ENSP00000361405	0	0	0	0	0	0	0.9	0.754	0.974
FGF2	IL6	9606.ENSP00000264498	9606.ENSP00000385675	0	0	0	0	0.061	0	0.9	0.764	0.975
FGF2	VEGFA	9606.ENSP00000264498	9606.ENSP00000478570	0	0	0	0	0	0	0.9	0.923	0.991
GAPDH	HSP90AA1	9606.ENSP00000229239	9606.ENSP00000335153	0	0	0	0	0.266	0.322	0	0.837	0.912
GAPDH	HSPA8	9606.ENSP00000229239	9606.ENSP00000432083	0.046	0	0	0	0.308	0.502	0	0.888	0.958
GAPDH	PLG	9606.ENSP00000229239	9606.ENSP00000308938	0	0	0	0	0	0.059	0	0.989	0.99
HDAC1	NFKB1	9606.ENSP00000362649	9606.ENSP00000226574	0	0	0	0	0.074	0.894	0	0.971	0.996
HDAC1	NR3C1	9606.ENSP00000362649	9606.ENSP00000231509	0	0	0	0	0	0.859	0	0.586	0.939
HDAC1	RARA	9606.ENSP00000362649	9606.ENSP00000254066	0	0	0	0	0	0.298	0.9	0.32	0.948
HDAC1	NR0B2	9606.ENSP00000362649	9606.ENSP00000254227	0	0	0	0	0	0.841	0	0.908	0.984
HDAC1	MDM2	9606.ENSP00000362649	9606.ENSP00000258149	0	0	0	0	0	0.675	0	0.979	0.993
HDAC1	PPARG	9606.ENSP00000362649	9606.ENSP00000287820	0	0	0	0	0	0.505	0.65	0.622	0.929
HDAC1	HDAC3	9606.ENSP00000362649	9606.ENSP00000302967	0	0	0.447	0.964	0.117	0.322	0.9	0.698	0.937
HDAC1	TERT	9606.ENSP00000362649	9606.ENSP00000309572	0	0	0	0	0.066	0	0.9	0.437	0.942
HDAC1	RARB	9606.ENSP00000362649	9606.ENSP00000332296	0	0	0	0	0	0.078	0.9	0.288	0.928
HDAC1	RARG	9606.ENSP00000362649	9606.ENSP00000388510	0	0	0	0	0.062	0.078	0.9	0.044	0.906
HDAC1	RXRB	9606.ENSP00000362649	9606.ENSP00000363817	0	0	0	0	0.053	0.078	0.9	0.078	0.908
HDAC1	RXRA	9606.ENSP00000362649	9606.ENSP00000419692	0	0	0	0	0.145	0.078	0.9	0.172	0.926
HDAC3	NFKB1	9606.ENSP00000302967	9606.ENSP00000226574	0	0	0	0	0.062	0.565	0.9	0.496	0.976
HDAC3	RARA	9606.ENSP00000302967	9606.ENSP00000254066	0	0	0	0	0	0.298	0.9	0.113	0.932
HDAC3	PPARG	9606.ENSP00000302967	9606.ENSP00000287820	0	0	0	0	0	0.841	0.9	0.853	0.997
HDAC3	RARG	9606.ENSP00000302967	9606.ENSP00000388510	0	0	0	0	0	0.078	0.9	0	0.903
HDAC3	RXRB	9606.ENSP00000302967	9606.ENSP00000363817	0	0	0	0	0.062	0.078	0.9	0.049	0.906
HDAC3	RARB	9606.ENSP00000302967	9606.ENSP00000332296	0	0	0	0	0	0.078	0.9	0.081	0.907
HDAC3	TNF	9606.ENSP00000302967	9606.ENSP00000398698	0	0	0	0	0	0.067	0.9	0.222	0.921
HDAC3	RXRA	9606.ENSP00000302967	9606.ENSP00000419692	0	0	0	0	0.047	0.298	0.9	0.066	0.929
HSF1	MAPK1	9606.ENSP00000431512	9606.ENSP00000215832	0	0	0	0	0.065	0.357	0.9	0.252	0.949
HSF1	MAPK3	9606.ENSP00000431512	9606.ENSP00000263025	0	0	0	0	0.065	0.526	0.9	0.542	0.977
HSF1	HSP90AA1	9606.ENSP00000431512	9606.ENSP00000335153	0	0	0	0	0.056	0.899	0.6	0.994	0.999
HSF1	MTOR	9606.ENSP00000431512	9606.ENSP00000354558	0	0	0	0	0.062	0.058	0.9	0.268	0.926
HSF1	HSP90AB1	9606.ENSP00000431512	9606.ENSP00000360609	0	0	0	0	0.056	0.495	0.72	0.666	0.949
HSF1	HSPA1A	9606.ENSP00000431512	9606.ENSP00000364802	0	0	0	0	0.053	0.907	0.6	0.829	0.993
HSF1	HSPA8	9606.ENSP00000431512	9606.ENSP00000432083	0	0	0	0	0.049	0.737	0.6	0.613	0.956
HSP90AA1	MAPK1	9606.ENSP00000335153	9606.ENSP00000215832	0	0	0	0	0.062	0.365	0.9	0.705	0.98
HSP90AA1	MMP2	9606.ENSP00000335153	9606.ENSP00000219070	0	0	0	0	0	0.27	0	0.918	0.938
HSP90AA1	RPS6KB1	9606.ENSP00000335153	9606.ENSP00000225577	0	0	0	0	0.076	0.247	0.9	0.7	0.976
HSP90AA1	IL2	9606.ENSP00000335153	9606.ENSP00000226730	0	0	0	0	0	0	0.9	0.502	0.948
HSP90AA1	NR3C1	9606.ENSP00000335153	9606.ENSP00000231509	0	0	0	0	0	0.923	0.9	0.989	0.999
HSP90AA1	MDM2	9606.ENSP00000335153	9606.ENSP00000258149	0	0	0	0	0	0.675	0	0.951	0.983
HSP90AA1	MAPK3	9606.ENSP00000335153	9606.ENSP00000263025	0	0	0	0	0.054	0.299	0.9	0.866	0.99
HSP90AA1	KDR	9606.ENSP00000335153	9606.ENSP00000263923	0	0	0	0	0	0.488	0.9	0.873	0.992
HSP90AA1	TERT	9606.ENSP00000335153	9606.ENSP00000309572	0	0	0	0	0	0.883	0.9	0.947	0.999
HSP90AA1	HSPA5	9606.ENSP00000335153	9606.ENSP00000324173	0	0	0	0	0.639	0.415	0	0.907	0.978
HSP90AA1	NOS2	9606.ENSP00000335153	9606.ENSP00000327251	0	0	0	0	0.062	0.299	0.9	0.513	0.963
HSP90AA1	JAK2	9606.ENSP00000335153	9606.ENSP00000371067	0	0	0	0	0	0.362	0	0.912	0.942
HSP90AA1	PTK2B	9606.ENSP00000335153	9606.ENSP00000380638	0	0	0	0	0	0.129	0.9	0.424	0.945
HSP90AA1	PRKCA	9606.ENSP00000335153	9606.ENSP00000408695	0	0	0	0	0	0.288	0.9	0.325	0.947
HSP90AA1	PTK2	9606.ENSP00000335153	9606.ENSP00000341189	0	0	0	0	0	0.129	0.9	0.592	0.961
HSP90AA1	TLR4	9606.ENSP00000335153	9606.ENSP00000363089	0	0	0	0	0	0.056	0	0.971	0.972
HSP90AA1	MTOR	9606.ENSP00000335153	9606.ENSP00000354558	0	0	0	0	0	0.092	0.9	0.763	0.976
HSP90AA1	LYN	9606.ENSP00000335153	9606.ENSP00000428924	0	0	0	0	0	0.539	0	0.96	0.981
HSP90AA1	VEGFA	9606.ENSP00000335153	9606.ENSP00000478570	0	0	0	0	0	0.27	0.9	0.872	0.989
HSP90AA1	PPARA	9606.ENSP00000335153	9606.ENSP00000385523	0	0	0	0	0	0.51	0.9	0.869	0.993
HSP90AA1	HSP90AB1	9606.ENSP00000335153	9606.ENSP00000360609	0	0	0.449	0.984	0.781	0.888	0.8	0.883	0.994
HSP90AA1	IKBKB	9606.ENSP00000335153	9606.ENSP00000430684	0	0	0	0	0	0.723	0	0.983	0.995
HSP90AA1	HSPA8	9606.ENSP00000335153	9606.ENSP00000432083	0	0	0	0	0.771	0.936	0.6	0.991	0.999
HSP90AA1	HSPA1A	9606.ENSP00000335153	9606.ENSP00000364802	0	0	0	0	0.317	0.871	0.9	0.91	0.999
HSP90AA1	SRC	9606.ENSP00000335153	9606.ENSP00000362680	0	0	0	0	0	0.821	0.9	0.989	0.999
HSP90AB1	MAPK1	9606.ENSP00000360609	9606.ENSP00000215832	0	0	0	0	0.054	0.227	0.9	0.308	0.942
HSP90AB1	NR3C1	9606.ENSP00000360609	9606.ENSP00000231509	0	0	0	0	0	0.821	0.6	0.683	0.975
HSP90AB1	MAPK3	9606.ENSP00000360609	9606.ENSP00000263025	0	0	0	0	0.054	0.299	0.9	0.374	0.953
HSP90AB1	HSPA5	9606.ENSP00000360609	9606.ENSP00000324173	0	0	0	0	0.639	0.315	0	0.77	0.938
HSP90AB1	HSPA1A	9606.ENSP00000360609	9606.ENSP00000364802	0	0	0	0	0.317	0.815	0.6	0.741	0.985
HSP90AB1	SRC	9606.ENSP00000360609	9606.ENSP00000362680	0	0	0	0	0	0.488	0.9	0.887	0.993
HSP90AB1	HSPA8	9606.ENSP00000360609	9606.ENSP00000432083	0	0	0	0	0.641	0.84	0.6	0.862	0.996
HSPA1A	MAPK1	9606.ENSP00000364802	9606.ENSP00000215832	0	0	0	0	0	0.104	0.9	0.255	0.927
HSPA1A	NR3C1	9606.ENSP00000364802	9606.ENSP00000231509	0	0	0	0	0	0.288	0.65	0.669	0.91
HSPA1A	MAPK3	9606.ENSP00000364802	9606.ENSP00000263025	0	0	0	0	0	0.187	0.9	0.385	0.945
HSPA1A	HSPA5	9606.ENSP00000364802	9606.ENSP00000324173	0	0	0.448	0.965	0.22	0.747	0.6	0.765	0.917
HSPA1A	JAK2	9606.ENSP00000364802	9606.ENSP00000371067	0	0	0	0	0	0.146	0.9	0.201	0.925
HSPA1A	PPARA	9606.ENSP00000364802	9606.ENSP00000385523	0	0	0	0	0	0.065	0.9	0.447	0.943
HSPA1A	HSPA8	9606.ENSP00000364802	9606.ENSP00000432083	0	0	0.449	0.983	0.062	0.735	0.8	0.848	0.947
HSPA5	PLG	9606.ENSP00000324173	9606.ENSP00000308938	0	0	0	0	0	0.058	0	0.948	0.95
HSPA5	HSPA8	9606.ENSP00000324173	9606.ENSP00000432083	0	0	0.448	0.966	0.235	0.748	0.6	0.815	0.919
IGF1R	MAPK1	9606.ENSP00000268035	9606.ENSP00000215832	0	0	0	0.57	0	0.148	0.9	0.653	0.935
IGF1R	RPS6KB1	9606.ENSP00000268035	9606.ENSP00000225577	0	0	0	0.553	0.056	0.119	0.9	0.839	0.943
IGF1R	PLCG1	9606.ENSP00000268035	9606.ENSP00000244007	0	0	0	0	0.062	0.142	0.8	0.601	0.927
IGF1R	MDM2	9606.ENSP00000268035	9606.ENSP00000258149	0	0	0	0	0	0.88	0.6	0.779	0.988
IGF1R	MAPK3	9606.ENSP00000268035	9606.ENSP00000263025	0	0	0	0.568	0	0.148	0.9	0.739	0.939
IGF1R	PIK3CA	9606.ENSP00000268035	9606.ENSP00000263967	0	0	0	0	0.063	0.146	0.9	0.889	0.989
IGF1R	PIK3CB	9606.ENSP00000268035	9606.ENSP00000289153	0	0	0	0	0.063	0.146	0.8	0.615	0.93
IGF1R	JAK2	9606.ENSP00000268035	9606.ENSP00000371067	0	0	0	0.564	0	0.471	0.8	0.905	0.933
IGF1R	SRC	9606.ENSP00000268035	9606.ENSP00000362680	0	0	0	0.711	0	0.47	0.9	0.943	0.959
IGF1R	PTPN1	9606.ENSP00000268035	9606.ENSP00000360683	0	0	0	0	0.062	0.957	0.9	0.586	0.998
IGF1R	PTPN11	9606.ENSP00000268035	9606.ENSP00000340944	0	0	0	0	0.062	0.712	0.9	0.977	0.999
IKBKB	NFKB1	9606.ENSP00000430684	9606.ENSP00000226574	0	0	0	0	0.062	0.963	0.9	0.86	0.999
IKBKB	PRKCB	9606.ENSP00000430684	9606.ENSP00000305355	0	0	0	0.565	0	0.688	0.9	0.431	0.973
IKBKB	TLR4	9606.ENSP00000430684	9606.ENSP00000363089	0	0	0	0	0	0.089	0.9	0.707	0.971
IKBKB	TNF	9606.ENSP00000430684	9606.ENSP00000398698	0	0	0	0	0.062	0.696	0.9	0.811	0.993
IKBKB	PRKCA	9606.ENSP00000430684	9606.ENSP00000408695	0	0	0	0.567	0	0.285	0.9	0.325	0.935
IL2	MAPK1	9606.ENSP00000226730	9606.ENSP00000215832	0	0	0	0	0	0	0.9	0.346	0.931
IL2	RPS6KB1	9606.ENSP00000226730	9606.ENSP00000225577	0	0	0	0	0	0	0.9	0.37	0.934
IL2	IL6	9606.ENSP00000226730	9606.ENSP00000385675	0	0	0	0	0	0	0	0.914	0.914
IL2	PRKCB	9606.ENSP00000226730	9606.ENSP00000305355	0	0	0	0	0	0	0.9	0.204	0.916
IL2	PIK3CA	9606.ENSP00000226730	9606.ENSP00000263967	0	0	0	0	0	0	0.9	0.231	0.919
IL2	PTK2B	9606.ENSP00000226730	9606.ENSP00000380638	0	0	0	0	0	0	0.9	0.312	0.928
IL2	TERT	9606.ENSP00000226730	9606.ENSP00000309572	0	0	0	0	0	0	0.9	0.325	0.929
IL2	TNF	9606.ENSP00000226730	9606.ENSP00000398698	0	0	0	0	0	0	0	0.933	0.933
IL2	MAP2K1	9606.ENSP00000226730	9606.ENSP00000302486	0	0	0	0	0	0	0.9	0.37	0.934
IL2	MAPK8	9606.ENSP00000226730	9606.ENSP00000378974	0	0	0	0	0	0	0.9	0.401	0.937
IL2	MAPK14	9606.ENSP00000226730	9606.ENSP00000229795	0	0	0	0	0	0	0.9	0.412	0.938
IL2	PTPN11	9606.ENSP00000226730	9606.ENSP00000340944	0	0	0	0	0	0	0.9	0.497	0.947
IL2	MAPK3	9606.ENSP00000226730	9606.ENSP00000263025	0	0	0	0	0	0	0.9	0.523	0.95
IL2	SYK	9606.ENSP00000226730	9606.ENSP00000364907	0	0	0	0	0	0	0.9	0.56	0.954
IL2	MTOR	9606.ENSP00000226730	9606.ENSP00000354558	0	0	0	0	0	0	0.9	0.607	0.959
IL2	JAK1	9606.ENSP00000226730	9606.ENSP00000343204	0	0	0	0	0	0	0.9	0.843	0.983
IL2	JAK3	9606.ENSP00000226730	9606.ENSP00000391676	0	0	0	0	0	0	0.9	0.961	0.995
IL6	MAPK1	9606.ENSP00000385675	9606.ENSP00000215832	0	0	0	0	0	0	0.9	0.589	0.957
IL6	MMP2	9606.ENSP00000385675	9606.ENSP00000219070	0	0	0	0	0.076	0	0.9	0.715	0.971
IL6	NFKB1	9606.ENSP00000385675	9606.ENSP00000226574	0	0	0	0	0.086	0	0.9	0.644	0.964
IL6	MAPK3	9606.ENSP00000385675	9606.ENSP00000263025	0	0	0	0	0	0	0.9	0.741	0.973
IL6	MAP2K1	9606.ENSP00000385675	9606.ENSP00000302486	0	0	0	0	0	0	0.9	0.577	0.955
IL6	MMP1	9606.ENSP00000385675	9606.ENSP00000322788	0	0	0	0	0.154	0	0.9	0.71	0.973
IL6	PTPN11	9606.ENSP00000385675	9606.ENSP00000340944	0	0	0	0	0	0	0.9	0.601	0.958
IL6	JAK1	9606.ENSP00000385675	9606.ENSP00000343204	0	0	0	0	0.062	0.189	0.9	0.744	0.978
IL6	MMP9	9606.ENSP00000385675	9606.ENSP00000361405	0	0	0	0	0.075	0	0.9	0.861	0.986
IL6	TLR4	9606.ENSP00000385675	9606.ENSP00000363089	0	0	0	0	0.081	0	0	0.937	0.94
IL6	JAK2	9606.ENSP00000385675	9606.ENSP00000371067	0	0	0	0	0.064	0	0.9	0.892	0.989
IL6	JAK3	9606.ENSP00000385675	9606.ENSP00000391676	0	0	0	0	0.062	0	0.9	0.619	0.961
IL6	TYK2	9606.ENSP00000385675	9606.ENSP00000431885	0	0	0	0	0	0	0.9	0.645	0.963
IL6	VEGFA	9606.ENSP00000385675	9606.ENSP00000478570	0	0	0	0	0.063	0	0.9	0.879	0.987
IL6	TNF	9606.ENSP00000385675	9606.ENSP00000398698	0	0	0	0	0.125	0	0.9	0.941	0.994
JAK1	MAPK1	9606.ENSP00000343204	9606.ENSP00000215832	0	0	0	0.608	0.168	0.148	0.9	0.359	0.932
JAK1	MAPK14	9606.ENSP00000343204	9606.ENSP00000229795	0	0	0	0.597	0.063	0.148	0.9	0.39	0.925
JAK1	MAPK3	9606.ENSP00000343204	9606.ENSP00000263025	0	0	0	0.6	0.111	0.148	0.9	0.572	0.935
JAK1	PIK3CA	9606.ENSP00000343204	9606.ENSP00000263967	0	0	0	0	0.062	0.104	0.9	0.394	0.942
JAK1	MAP2K1	9606.ENSP00000343204	9606.ENSP00000302486	0	0	0	0.593	0.063	0.178	0.9	0.465	0.931
JAK1	PRKCB	9606.ENSP00000343204	9606.ENSP00000305355	0	0	0	0.55	0	0.061	0.9	0.207	0.909
JAK1	PTPN2	9606.ENSP00000343204	9606.ENSP00000311857	0	0	0	0	0.062	0.3	0.9	0.836	0.987
JAK1	PTPN11	9606.ENSP00000343204	9606.ENSP00000340944	0	0	0	0	0.062	0.799	0.9	0.86	0.997
JAK1	MAPK8	9606.ENSP00000343204	9606.ENSP00000378974	0	0	0	0.561	0.063	0.143	0.9	0.435	0.928
JAK1	JAK2	9606.ENSP00000343204	9606.ENSP00000371067	0	0	0	0.911	0.085	0.27	0.9	0.992	0.933
JAK1	SYK	9606.ENSP00000343204	9606.ENSP00000364907	0	0	0	0.643	0	0.213	0.9	0.544	0.933
JAK1	PTK2B	9606.ENSP00000343204	9606.ENSP00000380638	0	0	0	0.582	0.062	0.298	0.9	0.467	0.941
JAK1	TYK2	9606.ENSP00000343204	9606.ENSP00000431885	0	0	0	0.926	0.062	0.462	0.9	0.992	0.949
JAK1	JAK3	9606.ENSP00000343204	9606.ENSP00000391676	0	0	0	0.892	0.062	0.462	0.9	0.976	0.95
JAK1	PTPN6	9606.ENSP00000343204	9606.ENSP00000391592	0	0	0	0	0.062	0.483	0.9	0.451	0.969
JAK1	PTPN1	9606.ENSP00000343204	9606.ENSP00000360683	0	0	0	0	0.062	0.148	0.9	0.788	0.98
JAK2	MAPK1	9606.ENSP00000371067	9606.ENSP00000215832	0	0	0	0.606	0.065	0.148	0.9	0.492	0.929
JAK2	NFKB1	9606.ENSP00000371067	9606.ENSP00000226574	0	0	0	0	0.09	0.12	0.9	0.412	0.946
JAK2	PLCG1	9606.ENSP00000371067	9606.ENSP00000244007	0	0	0	0	0.062	0.415	0.9	0.362	0.96
JAK2	PDGFRB	9606.ENSP00000371067	9606.ENSP00000261799	0	0	0	0.553	0	0.279	0.9	0.68	0.947
JAK2	MAPK3	9606.ENSP00000371067	9606.ENSP00000263025	0	0	0	0.603	0.065	0.148	0.9	0.7	0.937
JAK2	PIK3CA	9606.ENSP00000371067	9606.ENSP00000263967	0	0	0	0	0.09	0.104	0.9	0.645	0.967
JAK2	PIK3CB	9606.ENSP00000371067	9606.ENSP00000289153	0	0	0	0	0.062	0.104	0.9	0.319	0.935
JAK2	PTPN2	9606.ENSP00000371067	9606.ENSP00000311857	0	0	0	0	0.062	0.152	0.9	0.56	0.96
JAK2	NOS2	9606.ENSP00000371067	9606.ENSP00000327251	0	0	0	0	0	0.077	0.9	0.394	0.939
JAK2	PTPN11	9606.ENSP00000371067	9606.ENSP00000340944	0	0	0	0	0.062	0.8	0.9	0.983	0.999
JAK2	PTK2	9606.ENSP00000371067	9606.ENSP00000341189	0	0	0	0.575	0	0.505	0.9	0.472	0.958
JAK2	PTPN1	9606.ENSP00000371067	9606.ENSP00000360683	0	0	0	0	0.062	0.856	0.9	0.858	0.997
JAK2	SRC	9606.ENSP00000371067	9606.ENSP00000362680	0	0	0	0.636	0.062	0.345	0.9	0.972	0.956
JAK2	TYK2	9606.ENSP00000371067	9606.ENSP00000431885	0	0	0	0.881	0.062	0.27	0.9	0.965	0.934
JAK2	JAK3	9606.ENSP00000371067	9606.ENSP00000391676	0	0	0	0.943	0	0.462	0.9	0.868	0.946
JAK2	PTPN6	9606.ENSP00000371067	9606.ENSP00000391592	0	0	0	0	0.082	0.505	0.9	0.786	0.989
JAK3	MAPK1	9606.ENSP00000391676	9606.ENSP00000215832	0	0	0	0.597	0.065	0.148	0.9	0.306	0.923
JAK3	MAPK14	9606.ENSP00000391676	9606.ENSP00000229795	0	0	0	0.597	0.062	0.148	0.9	0.296	0.922
JAK3	MAPK3	9606.ENSP00000391676	9606.ENSP00000263025	0	0	0	0.592	0.065	0.148	0.9	0.438	0.928
JAK3	PIK3CA	9606.ENSP00000391676	9606.ENSP00000263967	0	0	0	0	0.062	0.104	0.9	0.508	0.953
JAK3	MAP2K1	9606.ENSP00000391676	9606.ENSP00000302486	0	0	0	0.617	0	0.178	0.9	0.365	0.925
JAK3	PRKCB	9606.ENSP00000391676	9606.ENSP00000305355	0	0	0	0.558	0.077	0.061	0.9	0.134	0.909
JAK3	PTPN2	9606.ENSP00000391676	9606.ENSP00000311857	0	0	0	0	0.062	0.304	0.9	0.615	0.971
JAK3	PTPN11	9606.ENSP00000391676	9606.ENSP00000340944	0	0	0	0	0.062	0.183	0.9	0.612	0.966
JAK3	SYK	9606.ENSP00000391676	9606.ENSP00000364907	0	0	0	0.646	0.087	0	0.9	0.558	0.923
JAK3	MAPK8	9606.ENSP00000391676	9606.ENSP00000378974	0	0	0	0.569	0.063	0.143	0.9	0.356	0.925
JAK3	PTK2B	9606.ENSP00000391676	9606.ENSP00000380638	0	0	0	0.573	0.085	0.298	0.9	0.703	0.95
JAK3	PTPN6	9606.ENSP00000391676	9606.ENSP00000391592	0	0	0	0	0.107	0.243	0.9	0.326	0.948
JAK3	TYK2	9606.ENSP00000391676	9606.ENSP00000431885	0	0	0	0.871	0.062	0.27	0.9	0.883	0.933
KDR	MAPK14	9606.ENSP00000263923	9606.ENSP00000229795	0	0	0	0.579	0	0.081	0.9	0.528	0.924
KDR	PLCG1	9606.ENSP00000263923	9606.ENSP00000244007	0	0	0	0	0	0.556	0.9	0.787	0.989
KDR	PTPN2	9606.ENSP00000263923	9606.ENSP00000311857	0	0	0	0	0	0.06	0.9	0.195	0.917
KDR	PTK2B	9606.ENSP00000263923	9606.ENSP00000380638	0	0	0	0.576	0	0.124	0.9	0.316	0.919
KDR	PTK2	9606.ENSP00000263923	9606.ENSP00000341189	0	0	0	0.577	0.065	0.124	0.9	0.583	0.932
KDR	PIK3CA	9606.ENSP00000263923	9606.ENSP00000263967	0	0	0	0	0.053	0.306	0.9	0.679	0.976
KDR	PTPN6	9606.ENSP00000263923	9606.ENSP00000391592	0	0	0	0	0.063	0.843	0.9	0.164	0.986
KDR	PTPN11	9606.ENSP00000263923	9606.ENSP00000340944	0	0	0	0	0.063	0.543	0.9	0.721	0.986
KDR	SRC	9606.ENSP00000263923	9606.ENSP00000362680	0	0	0	0.651	0.062	0.889	0.9	0.988	0.992
KDR	VEGFA	9606.ENSP00000263923	9606.ENSP00000478570	0	0	0	0	0.062	0.984	0.9	0.992	0.999
LYN	MAPK1	9606.ENSP00000428924	9606.ENSP00000215832	0	0	0.319	0.622	0	0.351	0.9	0.401	0.948
LYN	NFKB1	9606.ENSP00000428924	9606.ENSP00000226574	0	0	0	0	0.087	0.12	0.9	0.163	0.923
LYN	MAPK14	9606.ENSP00000428924	9606.ENSP00000229795	0	0	0.248	0.621	0	0.148	0.9	0.475	0.932
LYN	PLCG1	9606.ENSP00000428924	9606.ENSP00000244007	0	0	0	0	0.062	0.258	0.9	0.636	0.971
LYN	PDGFRB	9606.ENSP00000428924	9606.ENSP00000261799	0	0	0	0.701	0	0.122	0.9	0.492	0.921
LYN	MAPK3	9606.ENSP00000428924	9606.ENSP00000263025	0	0	0.338	0.607	0	0.543	0.9	0.718	0.969
LYN	PIK3CA	9606.ENSP00000428924	9606.ENSP00000263967	0	0	0	0	0.062	0.104	0.9	0.298	0.933
LYN	PIK3CB	9606.ENSP00000428924	9606.ENSP00000289153	0	0	0	0	0.062	0.104	0.8	0.509	0.906
LYN	PRKCB	9606.ENSP00000428924	9606.ENSP00000305355	0	0	0	0.576	0.057	0.496	0.8	0.517	0.918
LYN	S1PR1	9606.ENSP00000428924	9606.ENSP00000305416	0	0	0	0	0.062	0.069	0.9	0.15	0.915
LYN	PTPN11	9606.ENSP00000428924	9606.ENSP00000340944	0	0	0	0	0.062	0.078	0.9	0.729	0.973
LYN	PTK2	9606.ENSP00000428924	9606.ENSP00000341189	0	0	0	0.742	0.062	0.695	0.9	0.725	0.974
LYN	SRC	9606.ENSP00000428924	9606.ENSP00000362680	0	0	0.442	0.952	0	0.486	0.9	0.909	0.949
LYN	SYK	9606.ENSP00000428924	9606.ENSP00000364907	0	0	0	0.723	0.244	0.462	0.9	0.99	0.967
LYN	MAPK8	9606.ENSP00000428924	9606.ENSP00000378974	0	0	0.371	0.569	0.062	0.143	0.9	0.408	0.937
LYN	PTK2B	9606.ENSP00000428924	9606.ENSP00000380638	0	0	0	0.732	0.062	0.298	0.9	0.774	0.943
LYN	PTPN6	9606.ENSP00000428924	9606.ENSP00000391592	0	0	0	0	0.107	0.87	0.9	0.6	0.994
LYN	YES1	9606.ENSP00000428924	9606.ENSP00000462468	0	0	0	0.956	0	0	0.9	0.72	0.903
MAP2K1	MAPK1	9606.ENSP00000302486	9606.ENSP00000215832	0	0	0.311	0.594	0.066	0.974	0.9	0.964	0.998
MAP2K1	MAPK14	9606.ENSP00000302486	9606.ENSP00000229795	0	0	0.364	0.632	0.066	0.603	0.9	0.714	0.973
MAP2K1	MAPK3	9606.ENSP00000302486	9606.ENSP00000263025	0	0	0.317	0.59	0.066	0.963	0.9	0.956	0.998
MAP2K1	PIK3CA	9606.ENSP00000302486	9606.ENSP00000263967	0	0	0	0	0.062	0.152	0.9	0.72	0.974
MAP2K1	PAK1	9606.ENSP00000302486	9606.ENSP00000278568	0	0	0.393	0.653	0.062	0.616	0.9	0.603	0.972
MAP2K1	TYK2	9606.ENSP00000302486	9606.ENSP00000431885	0	0	0	0.588	0	0.178	0.9	0.24	0.921
MAP2K1	SRC	9606.ENSP00000302486	9606.ENSP00000362680	0	0	0.215	0.589	0.062	0.317	0.9	0.751	0.955
MAP2K1	PTPN11	9606.ENSP00000302486	9606.ENSP00000340944	0	0	0	0	0.065	0.429	0.9	0.713	0.982
MAP2K3	MAPK1	9606.ENSP00000345083	9606.ENSP00000215832	0	0	0.308	0.642	0.071	0.396	0.8	0.635	0.914
MAP2K3	MAPK14	9606.ENSP00000345083	9606.ENSP00000229795	0	0	0.369	0.615	0.064	0.927	0.9	0.943	0.995
MAP2K3	MAPK3	9606.ENSP00000345083	9606.ENSP00000263025	0	0	0.28	0.645	0.071	0.501	0.8	0.624	0.928
MAP2K3	PAK1	9606.ENSP00000345083	9606.ENSP00000278568	0	0	0.394	0.661	0.062	0	0.9	0.096	0.916
MAP2K3	PTK2B	9606.ENSP00000345083	9606.ENSP00000380638	0	0	0	0.594	0	0	0.9	0.15	0.904
MAP2K3	SRC	9606.ENSP00000345083	9606.ENSP00000362680	0	0	0.248	0.601	0.077	0.056	0.9	0.412	0.926
MAP2K3	MAPK8	9606.ENSP00000345083	9606.ENSP00000378974	0	0	0.392	0.609	0.062	0.139	0.9	0.748	0.946
MAP2K3	TNF	9606.ENSP00000345083	9606.ENSP00000398698	0	0	0	0	0.065	0	0.9	0.524	0.951
MAPK1	S1PR1	9606.ENSP00000215832	9606.ENSP00000305416	0	0	0	0	0	0	0.9	0.094	0.905
MAPK1	RXRB	9606.ENSP00000215832	9606.ENSP00000363817	0	0	0	0	0	0.104	0.9	0.05	0.907
MAPK1	RARG	9606.ENSP00000215832	9606.ENSP00000388510	0	0	0	0	0	0.104	0.9	0.053	0.907
MAPK1	RARB	9606.ENSP00000215832	9606.ENSP00000332296	0	0	0	0	0	0.104	0.9	0.108	0.913
MAPK1	TYK2	9606.ENSP00000215832	9606.ENSP00000431885	0	0	0	0.594	0	0.148	0.9	0.27	0.919
MAPK1	YES1	9606.ENSP00000215832	9606.ENSP00000462468	0	0	0	0.618	0.062	0.148	0.9	0.326	0.922
MAPK1	TERT	9606.ENSP00000215832	9606.ENSP00000309572	0	0	0	0	0.057	0	0.9	0.268	0.924
MAPK1	MET	9606.ENSP00000215832	9606.ENSP00000317272	0	0	0	0.589	0.062	0.148	0.9	0.386	0.925
MAPK1	PTK2	9606.ENSP00000215832	9606.ENSP00000341189	0	0	0	0.582	0.063	0.139	0.9	0.498	0.929
MAPK1	MAPK8	9606.ENSP00000215832	9606.ENSP00000378974	0	0	0.386	0.886	0.081	0.225	0.9	0.735	0.931
MAPK1	PRKCB	9606.ENSP00000215832	9606.ENSP00000305355	0	0	0	0.59	0.053	0.213	0.9	0.427	0.932
MAPK1	PRKCA	9606.ENSP00000215832	9606.ENSP00000408695	0	0	0	0.594	0.053	0.275	0.9	0.514	0.94
MAPK1	PPARA	9606.ENSP00000215832	9606.ENSP00000385523	0	0	0	0	0	0.264	0.9	0.271	0.941
MAPK1	NR3C1	9606.ENSP00000215832	9606.ENSP00000231509	0	0	0	0	0	0.264	0.9	0.296	0.943
MAPK1	NFKB1	9606.ENSP00000215832	9606.ENSP00000226574	0	0	0	0	0.042	0.134	0.9	0.424	0.945
MAPK1	RARA	9606.ENSP00000215832	9606.ENSP00000254066	0	0	0	0	0	0.436	0.9	0.123	0.946
MAPK1	RPS6KB1	9606.ENSP00000215832	9606.ENSP00000225577	0	0	0.355	0.649	0.062	0.309	0.9	0.594	0.95
MAPK1	RXRA	9606.ENSP00000215832	9606.ENSP00000419692	0	0	0	0	0	0.498	0.9	0.134	0.952
MAPK1	SRC	9606.ENSP00000215832	9606.ENSP00000362680	0	0	0.311	0.626	0.062	0.351	0.9	0.706	0.956
MAPK1	PTPN11	9606.ENSP00000215832	9606.ENSP00000340944	0	0	0	0	0.099	0.349	0.9	0.641	0.976
MAPK1	MAPK14	9606.ENSP00000215832	9606.ENSP00000229795	0	0	0.412	0.926	0.106	0.874	0.8	0.776	0.977
MAPK1	MAPK3	9606.ENSP00000215832	9606.ENSP00000263025	0	0	0.446	0.983	0	0.887	0.9	0.923	0.988
MAPK14	NFKB1	9606.ENSP00000229795	9606.ENSP00000226574	0	0	0	0	0.065	0.134	0.9	0.463	0.95
MAPK14	RARB	9606.ENSP00000229795	9606.ENSP00000332296	0	0	0	0	0	0.104	0.9	0.057	0.908
MAPK14	RARG	9606.ENSP00000229795	9606.ENSP00000388510	0	0	0	0	0	0.104	0.9	0.077	0.91
MAPK14	RARA	9606.ENSP00000229795	9606.ENSP00000254066	0	0	0	0	0	0.104	0.9	0.119	0.914
MAPK14	YES1	9606.ENSP00000229795	9606.ENSP00000462468	0	0	0	0.624	0.048	0.148	0.9	0.261	0.919
MAPK14	PTK2B	9606.ENSP00000229795	9606.ENSP00000380638	0	0	0	0.571	0.065	0.1	0.9	0.484	0.926
MAPK14	SYK	9606.ENSP00000229795	9606.ENSP00000364907	0	0	0	0.574	0.062	0.148	0.9	0.523	0.931
MAPK14	NR3C1	9606.ENSP00000229795	9606.ENSP00000231509	0	0	0	0	0	0.104	0.9	0.334	0.935
MAPK14	SRC	9606.ENSP00000229795	9606.ENSP00000362680	0	0	0.254	0.627	0	0.148	0.9	0.704	0.939
MAPK14	VEGFA	9606.ENSP00000229795	9606.ENSP00000478570	0	0	0	0	0	0	0.9	0.539	0.951
MAPK14	MAPK3	9606.ENSP00000229795	9606.ENSP00000263025	0	0	0.394	0.924	0.048	0.777	0.8	0.831	0.957
MAPK14	PAK1	9606.ENSP00000229795	9606.ENSP00000278568	0	0	0.371	0.644	0.053	0.501	0.9	0.336	0.959
MAPK14	TNF	9606.ENSP00000229795	9606.ENSP00000398698	0	0	0	0	0	0	0.9	0.768	0.975
MAPK3	RPS6KB1	9606.ENSP00000263025	9606.ENSP00000225577	0	0	0.372	0.625	0.062	0.309	0.9	0.78	0.956
MAPK3	NFKB1	9606.ENSP00000263025	9606.ENSP00000226574	0	0	0	0	0	0.134	0.9	0.402	0.943
MAPK3	NR3C1	9606.ENSP00000263025	9606.ENSP00000231509	0	0	0	0	0	0.104	0.9	0.627	0.963
MAPK3	RARA	9606.ENSP00000263025	9606.ENSP00000254066	0	0	0	0	0.062	0.104	0.9	0.21	0.924
MAPK3	RXRB	9606.ENSP00000263025	9606.ENSP00000363817	0	0	0	0	0	0.104	0.9	0.05	0.907
MAPK3	RARG	9606.ENSP00000263025	9606.ENSP00000388510	0	0	0	0	0	0.104	0.9	0.074	0.909
MAPK3	RARB	9606.ENSP00000263025	9606.ENSP00000332296	0	0	0	0	0	0.104	0.9	0.161	0.918
MAPK3	TYK2	9606.ENSP00000263025	9606.ENSP00000431885	0	0	0	0.589	0	0.148	0.9	0.397	0.924
MAPK3	TERT	9606.ENSP00000263025	9606.ENSP00000309572	0	0	0	0	0.057	0	0.9	0.342	0.932
MAPK3	PRKCB	9606.ENSP00000263025	9606.ENSP00000305355	0	0	0	0.587	0.053	0.213	0.9	0.468	0.933
MAPK3	MAPK8	9606.ENSP00000263025	9606.ENSP00000378974	0	0	0.39	0.874	0.083	0.225	0.9	0.837	0.934
MAPK3	MET	9606.ENSP00000263025	9606.ENSP00000317272	0	0	0	0.582	0.062	0.148	0.9	0.666	0.936
MAPK3	S1PR1	9606.ENSP00000263025	9606.ENSP00000305416	0	0	0	0	0	0	0.9	0.397	0.937
MAPK3	RXRA	9606.ENSP00000263025	9606.ENSP00000419692	0	0	0	0	0	0.317	0.9	0.152	0.937
MAPK3	PTK2	9606.ENSP00000263025	9606.ENSP00000341189	0	0	0	0.575	0.063	0.139	0.9	0.863	0.944
MAPK3	PRKCA	9606.ENSP00000263025	9606.ENSP00000408695	0	0	0	0.588	0.053	0.369	0.9	0.656	0.952
MAPK3	PPARA	9606.ENSP00000263025	9606.ENSP00000385523	0	0	0	0	0	0.264	0.9	0.511	0.96
MAPK3	SRC	9606.ENSP00000263025	9606.ENSP00000362680	0	0	0.308	0.611	0.062	0.538	0.9	0.835	0.971
MAPK3	PTPN11	9606.ENSP00000263025	9606.ENSP00000340944	0	0	0	0	0.067	0.784	0.9	0.83	0.996
MAPK8	NFKB1	9606.ENSP00000378974	9606.ENSP00000226574	0	0	0	0	0.068	0.102	0.8	0.493	0.903
MAPK8	NR3C1	9606.ENSP00000378974	9606.ENSP00000231509	0	0	0	0	0.065	0.213	0.9	0.292	0.94
MAPK8	RARA	9606.ENSP00000378974	9606.ENSP00000254066	0	0	0	0	0	0	0.9	0.159	0.912
MAPK8	PAK1	9606.ENSP00000378974	9606.ENSP00000278568	0	0	0.376	0.624	0.064	0.132	0.9	0.387	0.933
MAPK8	PRKCB	9606.ENSP00000378974	9606.ENSP00000305355	0	0	0	0.576	0.049	0	0.9	0.477	0.919
MAPK8	MET	9606.ENSP00000378974	9606.ENSP00000317272	0	0	0	0.56	0.062	0.101	0.9	0.326	0.92
MAPK8	SRC	9606.ENSP00000378974	9606.ENSP00000362680	0	0	0.376	0.573	0.063	0.143	0.9	0.704	0.947
MAPK8	RXRA	9606.ENSP00000378974	9606.ENSP00000419692	0	0	0	0	0	0	0.9	0.143	0.91
MAPK8	PTK2B	9606.ENSP00000378974	9606.ENSP00000380638	0	0	0	0	0.085	0	0.9	0.491	0.949
MET	PLCG1	9606.ENSP00000317272	9606.ENSP00000244007	0	0	0	0	0.048	0.321	0.9	0.386	0.955
MET	PIK3CA	9606.ENSP00000317272	9606.ENSP00000263967	0	0	0	0	0.063	0.104	0.9	0.753	0.976
MET	PTPN2	9606.ENSP00000317272	9606.ENSP00000311857	0	0	0	0	0.062	0.142	0.9	0.13	0.92
MET	VEGFA	9606.ENSP00000317272	9606.ENSP00000478570	0	0	0	0	0.067	0	0.6	0.769	0.906
MET	PTPN1	9606.ENSP00000317272	9606.ENSP00000360683	0	0	0	0	0.062	0.731	0.9	0.334	0.981
MET	SRC	9606.ENSP00000317272	9606.ENSP00000362680	0	0	0	0.684	0.064	0.756	0.9	0.939	0.982
MET	PTPN11	9606.ENSP00000317272	9606.ENSP00000340944	0	0	0	0	0.062	0.701	0.9	0.675	0.989
MMP1	MMP2	9606.ENSP00000322788	9606.ENSP00000219070	0	0	0	0.869	0.154	0	0.9	0.883	0.921
MMP1	PLG	9606.ENSP00000322788	9606.ENSP00000308938	0	0	0	0	0.064	0	0.9	0.631	0.962
MMP1	MMP9	9606.ENSP00000322788	9606.ENSP00000361405	0	0	0	0.75	0.518	0	0.9	0.901	0.961
MMP1	VEGFA	9606.ENSP00000322788	9606.ENSP00000478570	0	0	0	0	0.069	0	0.9	0.683	0.967
MMP2	MMP9	9606.ENSP00000219070	9606.ENSP00000361405	0	0	0	0.929	0.062	0	0.9	0.923	0.908
MMP2	SRC	9606.ENSP00000219070	9606.ENSP00000362680	0	0	0	0	0	0	0.9	0.622	0.96
MMP2	VEGFA	9606.ENSP00000219070	9606.ENSP00000478570	0	0	0	0	0.065	0	0.9	0.848	0.984
MMP9	PLG	9606.ENSP00000361405	9606.ENSP00000308938	0	0	0	0	0.064	0.213	0.9	0.812	0.984
MMP9	SRC	9606.ENSP00000361405	9606.ENSP00000362680	0	0	0	0	0.089	0	0.9	0.7	0.97
MMP9	VEGFA	9606.ENSP00000361405	9606.ENSP00000478570	0	0	0	0	0	0	0.9	0.879	0.987
MTOR	RPS6KB1	9606.ENSP00000354558	9606.ENSP00000225577	0	0	0	0	0.062	0.992	0.9	0.951	0.999
MTOR	NFKB1	9606.ENSP00000354558	9606.ENSP00000226574	0	0	0	0	0.054	0.159	0.9	0.233	0.93
MTOR	PIK3CA	9606.ENSP00000354558	9606.ENSP00000263967	0	0	0	0.541	0.062	0.347	0.9	0.782	0.957
MTOR	PPARG	9606.ENSP00000354558	9606.ENSP00000287820	0	0	0	0	0	0.061	0.8	0.813	0.961
MTOR	PIK3CB	9606.ENSP00000354558	9606.ENSP00000289153	0	0	0	0.541	0.062	0.347	0.8	0.67	0.906
MTOR	TERT	9606.ENSP00000354558	9606.ENSP00000309572	0	0	0	0	0	0.33	0.9	0.432	0.958
MTOR	PRKCA	9606.ENSP00000354558	9606.ENSP00000408695	0	0	0	0	0.049	0.27	0.9	0.605	0.968
NFKB1	TERT	9606.ENSP00000226574	9606.ENSP00000309572	0	0	0	0	0.062	0	0.9	0.158	0.914
NFKB1	TLR4	9606.ENSP00000226574	9606.ENSP00000363089	0	0	0	0	0.089	0.072	0.8	0.587	0.92
NFKB1	SYK	9606.ENSP00000226574	9606.ENSP00000364907	0	0	0	0	0.062	0.12	0.9	0.209	0.926
NFKB1	TYK2	9606.ENSP00000226574	9606.ENSP00000431885	0	0	0	0	0.073	0.12	0.9	0.204	0.926
NFKB1	PRKCA	9606.ENSP00000226574	9606.ENSP00000408695	0	0	0	0	0	0.176	0.9	0.265	0.934
NFKB1	SRC	9606.ENSP00000226574	9606.ENSP00000362680	0	0	0	0	0.063	0.12	0.9	0.3	0.934
NFKB1	PIK3CA	9606.ENSP00000226574	9606.ENSP00000263967	0	0	0	0	0.074	0.266	0.9	0.301	0.946
NFKB1	PPARG	9606.ENSP00000226574	9606.ENSP00000287820	0	0	0	0	0	0.282	0.9	0.421	0.954
NFKB1	TNF	9606.ENSP00000226574	9606.ENSP00000398698	0	0	0	0	0.108	0	0.9	0.699	0.97
NFKB1	NR3C1	9606.ENSP00000226574	9606.ENSP00000231509	0	0	0	0	0.064	0.683	0.9	0.358	0.978
NOS2	NR0B2	9606.ENSP00000327251	9606.ENSP00000254227	0	0	0	0	0	0.067	0.9	0.141	0.912
NOS2	RXRA	9606.ENSP00000327251	9606.ENSP00000419692	0	0	0	0	0	0.067	0.9	0.047	0.903
NOS2	PPARA	9606.ENSP00000327251	9606.ENSP00000385523	0	0	0	0	0	0.067	0.9	0.378	0.936
NOS2	TYK2	9606.ENSP00000327251	9606.ENSP00000431885	0	0	0	0	0	0.077	0.9	0.501	0.949
NOS2	SRC	9606.ENSP00000327251	9606.ENSP00000362680	0	0	0	0	0.065	0.242	0.9	0.371	0.949
NOS2	TNF	9606.ENSP00000327251	9606.ENSP00000398698	0	0	0	0	0.063	0	0.9	0.796	0.979
NR0B2	TNF	9606.ENSP00000254227	9606.ENSP00000398698	0	0	0	0	0	0	0.9	0.39	0.936
NR0B2	RXRA	9606.ENSP00000254227	9606.ENSP00000419692	0	0	0	0.653	0.062	0.486	0.9	0.501	0.956
NR0B2	PPARA	9606.ENSP00000254227	9606.ENSP00000385523	0	0	0	0	0.065	0	0.9	0.625	0.962
NR3C1	PIK3CA	9606.ENSP00000231509	9606.ENSP00000263967	0	0	0	0	0.082	0.061	0.9	0.208	0.922
NR3C1	RXRA	9606.ENSP00000231509	9606.ENSP00000419692	0	0	0	0.632	0	0	0.9	0.643	0.923
NR3C1	RARA	9606.ENSP00000231509	9606.ENSP00000254066	0	0	0	0.614	0	0.228	0.9	0.425	0.932
NR3C1	TNF	9606.ENSP00000231509	9606.ENSP00000398698	0	0	0	0	0	0	0.9	0.621	0.96
PAK1	PDGFRB	9606.ENSP00000278568	9606.ENSP00000261799	0	0	0	0.558	0	0	0.9	0.123	0.903
PAK1	YES1	9606.ENSP00000278568	9606.ENSP00000462468	0	0	0	0.566	0.062	0.076	0.9	0.194	0.912
PAK1	PTK2	9606.ENSP00000278568	9606.ENSP00000341189	0	0	0	0.571	0.063	0	0.9	0.306	0.913
PAK1	SRC	9606.ENSP00000278568	9606.ENSP00000362680	0	0	0.32	0.568	0.062	0.076	0.9	0.521	0.935
PDGFRB	PLCG1	9606.ENSP00000261799	9606.ENSP00000244007	0	0	0	0	0.062	0.977	0.9	0.867	0.999
PDGFRB	PTPN2	9606.ENSP00000261799	9606.ENSP00000311857	0	0	0	0	0	0.228	0.9	0.212	0.933
PDGFRB	PIK3CB	9606.ENSP00000261799	9606.ENSP00000289153	0	0	0	0	0	0.097	0.9	0.338	0.935
PDGFRB	YES1	9606.ENSP00000261799	9606.ENSP00000462468	0	0	0	0.652	0.049	0.331	0.9	0.251	0.936
PDGFRB	VEGFA	9606.ENSP00000261799	9606.ENSP00000478570	0	0	0	0	0.062	0.318	0.6	0.818	0.947
PDGFRB	PIK3CA	9606.ENSP00000261799	9606.ENSP00000263967	0	0	0	0	0	0.258	0.9	0.525	0.961
PDGFRB	S1PR1	9606.ENSP00000261799	9606.ENSP00000305416	0	0	0	0	0.097	0.27	0.9	0.66	0.974
PDGFRB	PTPN1	9606.ENSP00000261799	9606.ENSP00000360683	0	0	0	0	0	0.68	0.9	0.291	0.975
PDGFRB	SRC	9606.ENSP00000261799	9606.ENSP00000362680	0	0	0	0.659	0.062	0.885	0.9	0.873	0.991
PDGFRB	PTPN11	9606.ENSP00000261799	9606.ENSP00000340944	0	0	0	0	0.063	0.899	0.9	0.891	0.998
PIK3CA	RPS6KB1	9606.ENSP00000263967	9606.ENSP00000225577	0	0	0	0	0.065	0.354	0.9	0.809	0.986
PIK3CA	S1PR1	9606.ENSP00000263967	9606.ENSP00000305416	0	0	0	0	0	0	0.9	0.066	0.902
PIK3CA	PIK3CB	9606.ENSP00000263967	9606.ENSP00000289153	0	0	0	0.886	0.062	0	0.9	0.989	0.913
PIK3CA	PTPN6	9606.ENSP00000263967	9606.ENSP00000391592	0	0	0	0	0	0.066	0.9	0.151	0.913
PIK3CA	TYK2	9606.ENSP00000263967	9606.ENSP00000431885	0	0	0	0	0.062	0.104	0.9	0.17	0.92
PIK3CA	PTPN1	9606.ENSP00000263967	9606.ENSP00000360683	0	0	0	0	0.062	0.132	0.9	0.219	0.927
PIK3CA	SYK	9606.ENSP00000263967	9606.ENSP00000364907	0	0	0	0	0.063	0.104	0.9	0.338	0.937
PIK3CA	PTK2	9606.ENSP00000263967	9606.ENSP00000341189	0	0	0	0	0.072	0.297	0.9	0.369	0.953
PIK3CA	VEGFA	9606.ENSP00000263967	9606.ENSP00000478570	0	0	0	0	0	0	0.9	0.56	0.954
PIK3CA	SRC	9606.ENSP00000263967	9606.ENSP00000362680	0	0	0	0	0.062	0.104	0.9	0.695	0.971
PIK3CA	PTPN11	9606.ENSP00000263967	9606.ENSP00000340944	0	0	0	0	0.064	0.683	0.9	0.544	0.984
PIK3CB	SYK	9606.ENSP00000289153	9606.ENSP00000364907	0	0	0	0	0.063	0.104	0.9	0.394	0.942
PIK3CB	SRC	9606.ENSP00000289153	9606.ENSP00000362680	0	0	0	0	0.062	0.104	0.9	0.538	0.956
PLCG1	S1PR1	9606.ENSP00000244007	9606.ENSP00000305416	0	0	0	0	0	0	0.9	0.071	0.903
PLCG1	YES1	9606.ENSP00000244007	9606.ENSP00000462468	0	0	0	0.555	0.062	0.097	0.9	0.403	0.923
PLCG1	PRKCB	9606.ENSP00000244007	9606.ENSP00000305355	0	0	0	0	0.062	0.112	0.9	0.357	0.939
PLCG1	PRKCA	9606.ENSP00000244007	9606.ENSP00000408695	0	0	0	0	0.062	0.112	0.9	0.484	0.951
PLCG1	VEGFA	9606.ENSP00000244007	9606.ENSP00000478570	0	0	0	0	0	0	0.9	0.542	0.952
PLCG1	SRC	9606.ENSP00000244007	9606.ENSP00000362680	0	0	0	0.55	0.062	0.493	0.9	0.974	0.97
PLCG1	PTK2	9606.ENSP00000244007	9606.ENSP00000341189	0	0	0	0	0.062	0.739	0.9	0.586	0.988
PLCG1	SYK	9606.ENSP00000244007	9606.ENSP00000364907	0	0	0	0.556	0.064	0.935	0.9	0.974	0.996
PPARA	RXRB	9606.ENSP00000385523	9606.ENSP00000363817	0	0	0	0.689	0.058	0.294	0.9	0.594	0.94
PPARA	TNF	9606.ENSP00000385523	9606.ENSP00000398698	0	0	0	0	0	0	0.9	0.7	0.968
PPARA	RXRA	9606.ENSP00000385523	9606.ENSP00000419692	0	0	0	0.695	0.062	0.885	0.9	0.989	0.991
PPARG	RXRB	9606.ENSP00000287820	9606.ENSP00000363817	0	0	0	0.662	0.049	0.483	0.9	0.536	0.955
PPARG	TNF	9606.ENSP00000287820	9606.ENSP00000398698	0	0	0	0	0	0	0.9	0.807	0.979
PPARG	RXRA	9606.ENSP00000287820	9606.ENSP00000419692	0	0	0	0.694	0.062	0.981	0.9	0.99	0.998
PRKCA	RPS6KB1	9606.ENSP00000408695	9606.ENSP00000225577	0	0	0	0.821	0	0	0.9	0.6	0.91
PRKCA	RARA	9606.ENSP00000408695	9606.ENSP00000254066	0	0	0	0	0	0.213	0.9	0.135	0.926
PRKCA	TERT	9606.ENSP00000408695	9606.ENSP00000309572	0	0	0	0	0	0.213	0.9	0.256	0.936
PRKCA	SRC	9606.ENSP00000408695	9606.ENSP00000362680	0	0	0	0.575	0	0.229	0.9	0.863	0.948
PRKCA	RXRB	9606.ENSP00000408695	9606.ENSP00000363817	0	0	0	0	0	0	0.9	0	0.9
PRKCA	PTK2B	9606.ENSP00000408695	9606.ENSP00000380638	0	0	0	0.553	0	0	0.9	0.37	0.915
PRKCA	RXRA	9606.ENSP00000408695	9606.ENSP00000419692	0	0	0	0	0	0	0.9	0.095	0.905
PRKCB	RPS6KB1	9606.ENSP00000305355	9606.ENSP00000225577	0	0	0	0.808	0	0	0.9	0.259	0.904
PRKCB	PTK2B	9606.ENSP00000305355	9606.ENSP00000380638	0	0	0	0.552	0.123	0	0.9	0.229	0.916
PRKCB	SRC	9606.ENSP00000305355	9606.ENSP00000362680	0	0	0	0.572	0	0.061	0.9	0.465	0.92
PTK2	RPS6KB1	9606.ENSP00000341189	9606.ENSP00000225577	0	0	0	0.583	0	0	0.9	0.468	0.918
PTK2	PTPN11	9606.ENSP00000341189	9606.ENSP00000340944	0	0	0	0	0.064	0.869	0.9	0.518	0.993
PTK2	PTK2B	9606.ENSP00000341189	9606.ENSP00000380638	0	0	0	0.917	0	0.409	0.9	0.811	0.942
PTK2	SYK	9606.ENSP00000341189	9606.ENSP00000364907	0	0	0	0.703	0.07	0.505	0.9	0.691	0.96
PTK2	VEGFA	9606.ENSP00000341189	9606.ENSP00000478570	0	0	0	0	0	0	0.9	0.657	0.964
PTK2	YES1	9606.ENSP00000341189	9606.ENSP00000462468	0	0	0	0.722	0.09	0.836	0.9	0.578	0.986
PTK2	SRC	9606.ENSP00000341189	9606.ENSP00000362680	0	0	0	0.735	0.062	0.931	0.9	0.991	0.994
PTK2B	PTPN11	9606.ENSP00000380638	9606.ENSP00000340944	0	0	0	0	0.064	0.311	0.9	0.825	0.987
PTK2B	SRC	9606.ENSP00000380638	9606.ENSP00000362680	0	0	0	0.711	0.062	0.789	0.9	0.991	0.984
PTK2B	SYK	9606.ENSP00000380638	9606.ENSP00000364907	0	0	0	0.687	0.097	0.298	0.9	0.704	0.946
PTK2B	YES1	9606.ENSP00000380638	9606.ENSP00000462468	0	0	0	0.71	0.062	0.184	0.9	0.483	0.927
PTK2B	VEGFA	9606.ENSP00000380638	9606.ENSP00000478570	0	0	0	0	0	0	0.9	0.391	0.936
PTPN1	TYK2	9606.ENSP00000360683	9606.ENSP00000431885	0	0	0	0	0.062	0.298	0.9	0.452	0.959
PTPN1	SRC	9606.ENSP00000360683	9606.ENSP00000362680	0	0	0	0	0.086	0.875	0.9	0.804	0.997
PTPN11	PTPN2	9606.ENSP00000340944	9606.ENSP00000311857	0	0	0	0.775	0.065	0.154	0.9	0.698	0.927
PTPN11	PTPN6	9606.ENSP00000340944	9606.ENSP00000391592	0	0	0	0.952	0	0.273	0.9	0.688	0.926
PTPN11	TYK2	9606.ENSP00000340944	9606.ENSP00000431885	0	0	0	0	0.062	0.298	0.8	0.526	0.929
PTPN11	SYK	9606.ENSP00000340944	9606.ENSP00000364907	0	0	0	0.55	0.062	0.078	0.9	0.696	0.934
PTPN11	TLR4	9606.ENSP00000340944	9606.ENSP00000363089	0	0	0	0	0.049	0.148	0.9	0.338	0.939
PTPN11	VEGFA	9606.ENSP00000340944	9606.ENSP00000478570	0	0	0	0	0	0	0.9	0.535	0.951
PTPN11	SRC	9606.ENSP00000340944	9606.ENSP00000362680	0	0	0	0.55	0.064	0.747	0.9	0.99	0.985
PTPN2	TYK2	9606.ENSP00000311857	9606.ENSP00000431885	0	0	0	0	0.062	0.078	0.8	0.505	0.902
PTPN2	VEGFA	9606.ENSP00000311857	9606.ENSP00000478570	0	0	0	0	0	0	0.9	0.183	0.914
PTPN2	SRC	9606.ENSP00000311857	9606.ENSP00000362680	0	0	0	0	0.063	0.298	0.9	0.512	0.963
PTPN2	PTPN6	9606.ENSP00000311857	9606.ENSP00000391592	0	0	0	0.753	0.062	0.735	0.9	0.561	0.976
PTPN6	SRC	9606.ENSP00000391592	9606.ENSP00000362680	0	0	0	0	0.062	0.691	0	0.795	0.935
PTPN6	SYK	9606.ENSP00000391592	9606.ENSP00000364907	0	0	0	0	0.23	0.87	0.9	0.689	0.996
PTPN6	VEGFA	9606.ENSP00000391592	9606.ENSP00000478570	0	0	0	0	0	0	0.9	0.202	0.916
PTPN6	TYK2	9606.ENSP00000391592	9606.ENSP00000431885	0	0	0	0	0.089	0.482	0.9	0.668	0.982
RARA	RARB	9606.ENSP00000254066	9606.ENSP00000332296	0	0	0	0.976	0	0.475	0.9	0.715	0.946
RARA	RARG	9606.ENSP00000254066	9606.ENSP00000388510	0	0	0	0.973	0.081	0.674	0.9	0.758	0.968
RARA	RXRB	9606.ENSP00000254066	9606.ENSP00000363817	0	0	0	0.763	0.088	0.875	0.9	0.832	0.99
RARA	RXRA	9606.ENSP00000254066	9606.ENSP00000419692	0	0	0	0.773	0.095	0.982	0.9	0.988	0.998
RARB	RARG	9606.ENSP00000332296	9606.ENSP00000388510	0	0	0	0.974	0	0	0.9	0.816	0.902
RARB	RXRB	9606.ENSP00000332296	9606.ENSP00000363817	0	0	0	0.776	0.052	0.749	0.9	0.855	0.979
RARB	RXRA	9606.ENSP00000332296	9606.ENSP00000419692	0	0	0	0.782	0.062	0.955	0.9	0.778	0.996
RARG	RXRB	9606.ENSP00000388510	9606.ENSP00000363817	0	0	0	0.774	0.062	0.754	0.9	0.78	0.979
RARG	RXRA	9606.ENSP00000388510	9606.ENSP00000419692	0	0	0	0.79	0.085	0.351	0.9	0.907	0.947
RPS6KB1	RXRB	9606.ENSP00000225577	9606.ENSP00000363817	0	0	0	0	0.062	0.068	0.9	0.063	0.907
RPS6KB1	RXRA	9606.ENSP00000225577	9606.ENSP00000419692	0	0	0	0	0.062	0.068	0.9	0.084	0.909
RPS6KB1	TERT	9606.ENSP00000225577	9606.ENSP00000309572	0	0	0	0	0.062	0.297	0.9	0.369	0.952
RXRA	RXRB	9606.ENSP00000419692	9606.ENSP00000363817	0	0	0	0.968	0.07	0	0.9	0.838	0.905
RXRA	TNF	9606.ENSP00000419692	9606.ENSP00000398698	0	0	0	0	0	0	0.9	0.328	0.93
S1PR1	YES1	9606.ENSP00000305416	9606.ENSP00000462468	0	0	0	0	0	0.147	0.9	0	0.911
S1PR1	SRC	9606.ENSP00000305416	9606.ENSP00000362680	0	0	0	0	0	0.241	0.9	0.259	0.938
SRC	SYK	9606.ENSP00000362680	9606.ENSP00000364907	0	0	0	0.729	0.053	0.675	0.9	0.988	0.975
SRC	YES1	9606.ENSP00000362680	9606.ENSP00000462468	0	0	0	0.976	0	0.8	0.9	0.684	0.979
SRC	VEGFA	9606.ENSP00000362680	9606.ENSP00000478570	0	0	0	0	0.065	0	0.9	0.815	0.981
SYK	TLR4	9606.ENSP00000364907	9606.ENSP00000363089	0	0	0	0	0.124	0.488	0	0.988	0.994
SYK	YES1	9606.ENSP00000364907	9606.ENSP00000462468	0	0	0	0.731	0.053	0	0.9	0.545	0.915
TLR4	TNF	9606.ENSP00000363089	9606.ENSP00000398698	0	0	0	0	0.083	0	0	0.925	0.929

## Sheet: AM_Targets_Degree
Hub targets	Target name	CHEMBL	Target Class	Uniprot id	Degree	Closeness	Betweenness	Topological Coeffecient	String db identifier	Description of the target
AKT1	Serine/threonine-protein kinase AKT	CHEMBL4282	Kinase	P31749	69	0.88764	0.0492403	0.463952	9606.ENSP00000451828	V-akt murine thymoma viral oncogene homolog 1; AKT1 is one of 3 closely related serine/threonine- protein kinases (AKT1, AKT2 and AKT3) called the AKT kinase, and which regulate many processes including metabolism, proliferation, cell survival, growth and angiogenesis. This is mediated through serine and/or threonine phosphorylation of a range of downstream substrates. Over 100 substrate candidat…
SRC	Tyrosine-protein kinase SRC	CHEMBL267	Kinase	P12931	69	0.88764	0.0456062	0.451844	9606.ENSP00000362680	SRC proto-oncogene, non-receptor tyrosine kinase; Non-receptor protein tyrosine kinase which is activated following engagement of many different classes of cellular receptors including immune response receptors, integrins and other adhesion receptors, receptor protein tyrosine kinases, G protein- coupled receptors as well as cytokine receptors. Participates in signaling pathways that control a di…
MAPK3	MAP kinase ERK1	CHEMBL3385	Kinase	P27361	67	0.868132	0.0394271	0.461742	9606.ENSP00000263025	Extracellular signal-regulated kinase 1; Serine/threonine kinase which acts as an essential component of the MAP kinase signal transduction pathway. MAPK1/ERK2 and MAPK3/ERK1 are the 2 MAPKs which play an important role in the MAPK/ERK cascade. They participate also in a signaling cascade initiated by activated KIT and KITLG/SCF. Depending on the cellular context, the MAPK/ERK cascade mediates di…
EGFR	Epidermal growth factor receptor erbB1	CHEMBL203	Kinase	Q9H2C9	64	0.840426	0.0223438	0.485759	9606.ENSP00000275493	Receptor tyrosine-protein kinase erbB-1; Receptor tyrosine kinase binding ligands of the EGF family and activating several signaling cascades to convert extracellular cues into appropriate cellular responses. Known ligands include EGF, TGFA/TGF-alpha, amphiregulin, epigen/EPGN, BTC/betacellulin, epiregulin/EREG and HBEGF/heparin-binding EGF. Ligand binding triggers receptor homo- and/or heterodim…
GAPDH	Glyceraldehyde-3-phosphate dehydrogenase liver	CHEMBL2284	Oxidoreductase	P04406	61	0.814433	0.0243442	0.495331	9606.ENSP00000229239	Glyceraldehyde-3-phosphate dehydrogenase; Has both glyceraldehyde-3-phosphate dehydrogenase and nitrosylase activities, thereby playing a role in glycolysis and nuclear functions, respectively. Participates in nuclear events including transcription, RNA transport, DNA replication and apoptosis. Nuclear functions are probably due to the nitrosylase activity that mediates cysteine S-nitrosylation o…
HSP90AA1	Heat shock protein HSP 90-alpha	CHEMBL3880	Other cytosolic protein	P07900	60	0.806122	0.019848	0.492405	9606.ENSP00000335153	Heat shock protein 90kDa alpha (cytosolic), class A member 1; Molecular chaperone that promotes the maturation, structural maintenance and proper regulation of specific target proteins involved for instance in cell cycle control and signal transduction. Undergoes a functional cycle that is linked to its ATPase activity which is essential for its chaperone activity. This cycle probably induces con…
MAPK1	MAP kinase ERK2	CHEMBL4040	Kinase	P28482	60	0.806122	0.0289067	0.479325	9606.ENSP00000215832	Extracellular signal-regulated kinase 2; Serine/threonine kinase which acts as an essential component of the MAP kinase signal transduction pathway. MAPK1/ERK2 and MAPK3/ERK1 are the 2 MAPKs which play an important role in the MAPK/ERK cascade. They participate also in a signaling cascade initiated by activated KIT and KITLG/SCF. Depending on the cellular context, the MAPK/ERK cascade mediates di…
TNF	Tumor Necrosis factor- alpha	CHEMBL1825	Secreted protein	P01375	60	0.806122	0.0189441	0.494726	9606.ENSP00000398698	Tumor necrosis factor ligand superfamily member 2; Cytokine that binds to TNFRSF1A/TNFR1 and TNFRSF1B/TNFBR. It is mainly secreted by macrophages and can induce cell death of certain tumor cell lines. It is potent pyrogen causing fever by direct action or by stimulation of interleukin-1 secretion and is implicated in the induction of cachexia, Under certain conditions it can stimulate cell prolif…
CASP3	Caspase 3	CHEMBL2334	Protease	P42574	57	0.782178	0.014833	0.500555	9606.ENSP00000311032	Caspase 3, apoptosis-related cysteine peptidase; Involved in the activation cascade of caspases responsible for apoptosis execution. At the onset of apoptosis it proteolytically cleaves poly(ADP-ribose) polymerase (PARP) at a '216-Asp-|-Gly-217' bond. Cleaves and activates sterol regulatory element binding proteins (SREBPs) between the basic helix-loop- helix leucine zipper domain and the membran…
IL6	Interleukin-6	CHEMBL1795129	Secreted protein	P05231	56	0.77451	0.013249	0.51085	9606.ENSP00000385675	B-cell stimulatory factor 2; Cytokine with a wide variety of biological functions. It is a potent inducer of the acute phase response. Plays an essential role in the final differentiation of B-cells into Ig- secreting cells Involved in lymphocyte and monocyte differentiation. Acts on B-cells, T-cells, hepatocytes, hematopoietic progenitor cells and cells of the CNS. Required for the generation of…
VEGFA	Vascular endothelial growth factor A	CHEMBL1783	Secreted protein	Q9H1W9	56	0.77451	0.0133087	0.508816	9606.ENSP00000478570	Vascular endothelial growth factor A; Growth factor active in angiogenesis, vasculogenesis and endothelial cell growth. Induces endothelial cell proliferation, promotes cell migration, inhibits apoptosis and induces permeabilization of blood vessels. Binds to the FLT1/VEGFR1 and KDR/VEGFR2 receptors, heparan sulfate and heparin. NRP1/Neuropilin-1 binds isoforms VEGF-165 and VEGF-145. Isoform VEGF…
MTOR	Serine/threonine-protein kinase mTOR	CHEMBL2842	Kinase	P42345	55	0.76699	0.0117246	0.520829	9606.ENSP00000354558	FK506-binding protein 12-rapamycin complex-associated protein 1; Serine/threonine protein kinase which is a central regulator of cellular metabolism, growth and survival in response to hormones, growth factors, nutrients, energy and stress signals. MTOR directly or indirectly regulates the phosphorylation of at least 800 proteins. Functions as part of 2 structurally and functionally distinct sign…
ESR1	Estrogen receptor alpha	CHEMBL206	Nuclear receptor	P03372	54	0.759615	0.0209627	0.495781	9606.ENSP00000405330	Nuclear receptor subfamily 3 group A member 1; Nuclear hormone receptor. The steroid hormones and their receptors are involved in the regulation of eukaryotic gene expression and affect cellular proliferation and differentiation in target tissues. Ligand-dependent nuclear transactivation involves either direct homodimer binding to a palindromic estrogen response element (ERE) sequence or associat…
ERBB2	Receptor protein-tyrosine kinase erbB-2	CHEMBL1824	Kinase	P04626	53	0.752381	0.0119417	0.510867	9606.ENSP00000269571	V-erb-b2 avian erythroblastic leukemia viral oncogene homolog 2; Protein tyrosine kinase that is part of several cell surface receptor complexes, but that apparently needs a coreceptor for ligand binding. Essential component of a neuregulin-receptor complex, although neuregulins do not interact with it alone. GP30 is a potential ligand for this receptor. Regulates outgrowth and stabilization of p…
MAPK14	MAP kinase p38 alpha	CHEMBL260	Kinase	Q16539	51	0.738318	0.0167452	0.502358	9606.ENSP00000229795	Cytokine suppressive anti-inflammatory drug-binding protein; Serine/threonine kinase which acts as an essential component of the MAP kinase signal transduction pathway. MAPK14 is one of the four p38 MAPKs which play an important role in the cascades of cellular responses evoked by extracellular stimuli such as proinflammatory cytokines or physical stress leading to direct activation of transcript…
MAPK8	c-Jun N-terminal kinase 1	CHEMBL2276	Kinase	P45983	50	0.731481	0.0140533	0.503291	9606.ENSP00000378974	Stress-activated protein kinase JNK1; Serine/threonine-protein kinase involved in various processes such as cell proliferation, differentiation, migration, transformation and programmed cell death. Extracellular stimuli such as proinflammatory cytokines or physical stress stimulate the stress-activated protein kinase/c-Jun N-terminal kinase (SAP/JNK) signaling pathway. In this cascade, two dual s…
JAK2	Tyrosine-protein kinase JAK2	CHEMBL2971	Kinase	O60674	48	0.718182	0.00931015	0.512658	9606.ENSP00000371067	Tyrosine-protein kinase JAK2; Non-receptor tyrosine kinase involved in various processes such as cell growth, development, differentiation or histone modifications. Mediates essential signaling events in both innate and adaptive immunity. In the cytoplasm, plays a pivotal role in signal transduction via its association with type I receptors such as growth hormone (GHR), prolactin (PRLR), leptin (…
PIK3CA	PI3-kinase p110-alpha subunit	CHEMBL4005	Enzyme	P42336	48	0.718182	0.00824355	0.521624	9606.ENSP00000263967	Phosphatidylinositol 4,5-bisphosphate 3-kinase 110 kDa catalytic subunit alpha; Phosphoinositide-3-kinase (PI3K) that phosphorylates PtdIns (Phosphatidylinositol), PtdIns4P (Phosphatidylinositol 4- phosphate) and PtdIns(4,5)P2 (Phosphatidylinositol 4,5- bisphosphate) to generate phosphatidylinositol 3,4,5-trisphosphate (PIP3). PIP3 plays a key role by recruiting PH domain-containing proteins to t…
S1PR1	Sphingosine 1-phosphate receptor Edg-1	CHEMBL4333	Family A G protein-coupled receptor	P21453	48	0.7102	0.00111	0.521642	9606.ENSP00000305416	Endothelial differentiation G-protein coupled receptor 1; G-protein coupled receptor for the bioactive lysosphingolipid sphingosine 1-phosphate (S1P) that seems to be coupled to the G(i) subclass of heteromeric G proteins. Signaling leads to the activation of RAC1, SRC, PTK2/FAK1 and MAP kinases. Plays an important role in cell migration, probably via its role in the reorganization of the actin c…
PPARG	Peroxisome proliferator-activated receptor gamma	CHEMBL235	Nuclear receptor	Q15180	46	0.705357	0.0101602	0.522289	9606.ENSP00000287820	Peroxisome proliferator-activated receptor gamma; Nuclear receptor that binds peroxisome proliferators such as hypolipidemic drugs and fatty acids. Once activated by a ligand, the nuclear receptor binds to DNA specific PPAR response elements (PPRE) and modulates the transcription of its target genes, such as acyl-CoA oxidase. It therefore controls the peroxisomal beta-oxidation pathway of fatty a…
IL2	Interleukin-2	CHEMBL5880	Secreted protein	P60568	45	0.699115	0.00726694	0.532489	9606.ENSP00000226730	T-cell growth factor; Produced by T-cells in response to antigenic or mitogenic stimulation, this protein is required for T-cell proliferation and other activities crucial to regulation of the immune response. Can stimulate B-cells, monocytes, lymphokine- activated killer cells, natural killer cells, and glioma cells; Interleukins
MDM2	p53-binding protein Mdm-2	CHEMBL5023	Other nuclear protein	Q53XW0	43	0.686957	0.00595608	0.546364	9606.ENSP00000258149	MDM2 proto-oncogene, E3 ubiquitin protein ligase; E3 ubiquitin-protein ligase that mediates ubiquitination of p53/TP53, leading to its degradation by the proteasome. Inhibits p53/TP53- and p73/TP73-mediated cell cycle arrest and apoptosis by binding its transcriptional activation domain. Also acts as a ubiquitin ligase E3 toward itself and ARRB1. Permits the nuclear export of p53/TP53. Promotes p…
PTPN11	Protein-tyrosine phosphatase 2C	CHEMBL3864	Phosphatase	Q06124	42	0.681034	0.00618718	0.526221	9606.ENSP00000340944	Protein tyrosine phosphatase, non-receptor type 11; Acts downstream of various receptor and cytoplasmic protein tyrosine kinases to participate in the signal transduction from the cell surface to the nucleus. Positively regulates MAPK signal transduction pathway. Dephosphorylates GAB1, ARHGAP35 and EGFR. Dephosphorylates ROCK2 at 'Tyr-722' resulting in stimulatation of its RhoA binding activity. …
TLR4	Toll-like receptor 4	CHEMBL5255	Toll-like and Il-1 receptors	Q5VZI9	41	0.675214	0.0071673	0.516517	9606.ENSP00000363089	Toll-like receptor 4; Cooperates with LY96 and CD14 to mediate the innate immune response to bacterial lipopolysaccharide (LPS). Acts via MYD88, TIRAP and TRAF6, leading to NF-kappa-B activation, cytokine secretion and the inflammatory response. Also involved in LPS-independent inflammatory responses triggered by free fatty acids, such as palmitate, and Ni(2+). Responses triggered by Ni(2+) requi…
CREBBP	CREB-binding protein/p53	CHEMBL5747	Writer	Q92793	40	0.669492	0.00355367	0.562975	9606.ENSP00000262367	CREB binding protein; Acetylates histones, giving a specific tag for transcriptional activation. Also acetylates non-histone proteins, like NCOA3 and FOXO1. Binds specifically to phosphorylated CREB and enhances its transcriptional activity toward cAMP-responsive genes. Acts as a coactivator of ALX1. Acts as a circadian transcriptional coactivator which enhances the activity of the circadian tran…
MMP9	Matrix metalloproteinase 9	CHEMBL321	Protease	P14780	40	0.669492	0.0119	0.500949	9606.ENSP00000361405	Matrix metallopeptidase 9 (gelatinase B, 92kDa gelatinase, 92kDa type IV collagenase); May play an essential role in local proteolysis of the extracellular matrix and in leukocyte migration. Could play a role in bone osteoclastic resorption. Cleaves KiSS1 at a Gly-|-Leu bond. Cleaves type IV and type V collagen into large C-terminal three quarter fragments and shorter N-terminal one quarter fragm…
FGF2	Basic fibroblast growth factor	CHEMBL3107	Secreted protein	Q9UCS5	39	0.663866	0.00406352	0.567024	9606.ENSP00000264498	Fibroblast growth factor 2 (basic); Plays an important role in the regulation of cell survival, cell division, angiogenesis, cell differentiation and cell migration. Functions as potent mitogen in vitro. Can induce angiogenesis; Belongs to the heparin-binding growth factors family.
HDAC1	Histone deacetylase 1	CHEMBL325	Eraser	Q13547	39	0.663866	0.0100874	0.506978	9606.ENSP00000362649	Histone deacetylase 1; Responsible for the deacetylation of lysine residues on the N-terminal part of the core histones (H2A, H2B, H3 and H4). Histone deacetylation gives a tag for epigenetic repression and plays an important role in transcriptional regulation, cell cycle progression and developmental events. Histone deacetylases act via the formation of large multiprotein complexes. Deacetylates…
MAP2K1	Dual specificity mitogen-activated protein kinase kinase 1	CHEMBL3587	Kinase	Q02750	39	0.663866	0.0034738	0.55826	9606.ENSP00000302486	Dual specificity mitogen-activated protein kinase kinase 1; Dual specificity protein kinase which acts as an essential component of the MAP kinase signal transduction pathway. Binding of extracellular ligands such as growth factors, cytokines and hormones to their cell-surface receptors activates RAS and this initiates RAF1 activation. RAF1 then further activates the dual-specificity protein kina…
AR	Androgen Receptor	CHEMBL1871	Nuclear receptor	P10275	38	0.658333	0.00625632	0.537308	9606.ENSP00000363822	Nuclear receptor subfamily 3 group C member 4; Steroid hormone receptors are ligand-activated transcription factors that regulate eukaryotic gene expression and affect cellular proliferation and differentiation in target tissues. Transcription factor activity is modulated by bound coactivator and corepressor proteins. Transcription activation is down-regulated by NR0B2. Activated, but not phospho…
CASP8	Caspase-8	CHEMBL3776	Protease	Q9UQ81	38	0.658333	0.00338551	0.575283	9606.ENSP00000351273	Caspase 8, apoptosis-related cysteine peptidase; Most upstream protease of the activation cascade of caspases responsible for the TNFRSF6/FAS mediated and TNFRSF1A induced cell death. Binding to the adapter molecule FADD recruits it to either receptor. The resulting aggregate called death- inducing signaling complex (DISC) performs CASP8 proteolytic activation. The active dimeric enzyme is then l…
JAK1	Tyrosine-protein kinase JAK1	CHEMBL2835	Kinase	P23458	38	0.652893	0.00524836	0.539811	9606.ENSP00000343204	Tyrosine-protein kinase JAK1; Tyrosine kinase of the non-receptor type, involved in the IFN-alpha/beta/gamma signal pathway. Kinase partner for the interleukin (IL)-2 receptor; FERM domain containing
PTK2	Protein tyrosine kinase 2 beta	CHEMBL5469	Kinase	Q05397	38	0.658333	0.00353797	0.56429	9606.ENSP00000341189	Protein phosphatase 1 regulatory subunit 71; Non-receptor protein-tyrosine kinase that plays an essential role in regulating cell migration, adhesion, spreading, reorganization of the actin cytoskeleton, formation and disassembly of focal adhesions and cell protrusions, cell cycle progression, cell proliferation and apoptosis. Required for early embryonic development and placenta development. Req…
RPS6KB1	Ribosomal protein S6 kinase 1	CHEMBL4501	Kinase	P23443	38	0.658333	0.00483047	0.552965	9606.ENSP00000225577	Ribosomal protein S6 kinase, 70kDa, polypeptide 1; Serine/threonine-protein kinase that acts downstream of mTOR signaling in response to growth factors and nutrients to promote cell proliferation, cell growth and cell cycle progression. Regulates protein synthesis through phosphorylation of EIF4B, RPS6 and EEF2K, and contributes to cell survival by repressing the pro-apoptotic function of BAD. Un…
LYN	Tyrosine-protein kinase Lyn (by homology)	CHEMBL3905	Kinase	P07948	37	0.652893	0.00545929	0.530619	9606.ENSP00000428924	V-yes-1 Yamaguchi sarcoma viral related oncogene homolog; Non-receptor tyrosine-protein kinase that transmits signals from cell surface receptors and plays an important role in the regulation of innate and adaptive immune responses, hematopoiesis, responses to growth factors and cytokines, integrin signaling, but also responses to DNA damage and genotoxic agents. Functions primarily as negative r…
IGF1R	Insulin-like growth factor I receptor	CHEMBL1957	Kinase	P08069	36	0.647541	0.00499401	0.548875	9606.ENSP00000268035	Insulin-like growth factor 1 receptor; Receptor tyrosine kinase which mediates actions of insulin-like growth factor 1 (IGF1). Binds IGF1 with high affinity and IGF2 and insulin (INS) with a lower affinity. The activated IGF1R is involved in cell growth and survival control. IGF1R is crucial for tumor transformation and survival of malignant cell. Ligand binding activates the receptor kinase, lea…
KDR	Vascular endothelial growth factor receptor 2	CHEMBL279	Kinase	P35968	36	0.647541	0.00340116	0.554149	9606.ENSP00000263923	Kinase insert domain receptor (a type III receptor tyrosine kinase); Tyrosine-protein kinase that acts as a cell-surface receptor for VEGFA, VEGFC and VEGFD. Plays an essential role in the regulation of angiogenesis, vascular development, vascular permeability, and embryonic hematopoiesis. Promotes proliferation, survival, migration and differentiation of endothelial cells. Promotes reorganizatio…
NFKB1	Nuclear factor NF-kappa-B p105 subunit	CHEMBL3251	Other cytosolic protein	P19838	36	0.647541	0.0025017	0.591772	9606.ENSP00000226574	Nuclear factor of kappa light polypeptide gene enhancer in B-cells 1; NF-kappa-B is a pleiotropic transcription factor present in almost all cell types and is the endpoint of a series of signal transduction events that are initiated by a vast array of stimuli related to many biological processes such as inflammation, immunity, differentiation, cell growth, tumorigenesis and apoptosis. NF-kappa-B …
HSP90AB1	Heat shock protein HSP 90-beta	CHEMBL4303	Other cytosolic protein	P08238	35	0.642276	0.00392124	0.542495	9606.ENSP00000360609	Heat shock protein 90kDa alpha (cytosolic), class B member 1; Molecular chaperone that promotes the maturation, structural maintenance and proper regulation of specific target proteins involved for instance in cell cycle control and signal transduction. Undergoes a functional cycle that is linked to its ATPase activity. This cycle probably induces conformational changes in the client proteins, th…
PDGFRB	Platelet-derived growth factor receptor beta	CHEMBL1913	Kinase	P09619	35	0.642276	0.00366721	0.545027	9606.ENSP00000261799	Platelet-derived growth factor receptor, beta polypeptide; Tyrosine-protein kinase that acts as cell-surface receptor for homodimeric PDGFB and PDGFD and for heterodimers formed by PDGFA and PDGFB, and plays an essential role in the regulation of embryonic development, cell proliferation, survival, differentiation, chemotaxis and migration. Plays an essential role in blood vessel development by p…
ABL1	Tyrosine-protein kinase ABL	CHEMBL1862	Kinase	P00519	34	0.637097	0.00423254	0.535741	9606.ENSP00000361423	ABL proto-oncogene 1, non-receptor tyrosine kinase; Non-receptor tyrosine-protein kinase that plays a role in many key processes linked to cell growth and survival such as cytoskeleton remodeling in response to extracellular stimuli, cell motility and adhesion, receptor endocytosis, autophagy, DNA damage response and apoptosis. Coordinates actin remodeling through tyrosine phosphorylation of prot…
MET	Hepatocyte growth factor receptor	CHEMBL3717	Kinase	P08581	34	0.637097	0.00641164	0.553239	9606.ENSP00000317272	MET proto-oncogene, receptor tyrosine kinase; Receptor tyrosine kinase that transduces signals from the extracellular matrix into the cytoplasm by binding to hepatocyte growth factor/HGF ligand. Regulates many physiological processes including proliferation, scattering, morphogenesis and survival. Ligand binding at the cell surface induces autophosphorylation of MET on its intracellular domain th…
MMP2	Matrix metalloproteinase 2	CHEMBL333	Protease	P08253	31	0.622047	0.00244415	0.576562	9606.ENSP00000219070	Matrix metallopeptidase 2 (gelatinase A, 72kDa gelatinase, 72kDa type IV collagenase); Ubiquitinous metalloproteinase that is involved in diverse functions such as remodeling of the vasculature, angiogenesis, tissue repair, tumor invasion, inflammation, and atherosclerotic plaque rupture. As well as degrading extracellular matrix proteins, can also act on several nonmatrix proteins such as big en…
NR3C1	Glucocorticoid receptor	CHEMBL2034	Nuclear receptor	P04150	31	0.622047	0.00120878	0.592895	9606.ENSP00000231509	Nuclear receptor subfamily 3, group C, member 1 (glucocorticoid receptor); Isoform Alpha-D3: Has lowest transcriptional activation activity of all isoforms created by alternative initiation. Has transcriptional repression activity; Nuclear hormone receptors
PIK3CB	PI3-kinase p110-beta subunit	CHEMBL3145	Enzyme	P42338	31	0.622047	0.00760971	0.57942	9606.ENSP00000289153	Phosphatidylinositol 4,5-bisphosphate 3-kinase 110 kDa catalytic subunit beta; Phosphoinositide-3-kinase (PI3K) that phosphorylates PtdIns (Phosphatidylinositol), PtdIns4P (Phosphatidylinositol 4- phosphate) and PtdIns(4,5)P2 (Phosphatidylinositol 4,5- bisphosphate) to generate phosphatidylinositol 3,4,5-trisphosphate (PIP3). PIP3 plays a key role by recruiting PH domain-containing proteins to th…
PTPN1	Protein-tyrosine phosphatase 1B	CHEMBL335	Phosphatase	P18031	31	0.622047	0.00287333	0.521437	9606.ENSP00000360683	Protein tyrosine phosphatase, non-receptor type 1; Tyrosine-protein phosphatase which acts as a regulator of endoplasmic reticulum unfolded protein response. Mediates dephosphorylation of EIF2AK3/PERK; inactivating the protein kinase activity of EIF2AK3/PERK. May play an important role in CKII- and p60c-src-induced signal transduction cascades. May regulate the EFNA5-EPHA3 signaling pathway which…
PRKCA	Protein kinase C alpha	CHEMBL299	Kinase	P17252	30	0.617188	0.00121642	0.608017	9606.ENSP00000408695	Protein kinase C alpha type; Calcium-activated, phospholipid- and diacylglycerol (DAG)-dependent serine/threonine-protein kinase that is involved in positive and negative regulation of cell proliferation, apoptosis, differentiation, migration and adhesion, tumorigenesis, cardiac hypertrophy, angiogenesis, platelet function and inflammation, by directly phosphorylating targets such as RAF1, BCL2, …
TERT	Telomerase reverse transcriptase	CHEMBL2916	Enzyme	O14746	30	0.617188	0.00397803	0.542616	9606.ENSP00000309572	Telomerase reverse transcriptase; Telomerase is a ribonucleoprotein enzyme essential for the replication of chromosome termini in most eukaryotes. Active in progenitor and cancer cells. Inactive, or very low activity, in normal somatic cells. Catalytic component of the teleromerase holoenzyme complex whose main activity is the elongation of telomeres by acting as a reverse transcriptase that adds…
HSPA5	78 kDa glucose-regulated protein	CHEMBL1781865	Unclassified protein	P11021	29	0.612403	0.00182235	0.583588	9606.ENSP00000324173	Heat shock 70kDa protein 5 (glucose-regulated protein, 78kDa); Plays a role in facilitating the assembly of multimeric protein complexes inside the endoplasmic reticulum. Involved in the correct folding of proteins and degradation of misfolded proteins via its interaction with DNAJC10, probably to facilitate the release of DNAJC10 from its substrate (By similarity); Belongs to the heat shock prot…
PPARA	Peroxisome proliferator-activated receptor alpha	CHEMBL239	Nuclear receptor	Q07869	29	0.612403	0.00697652	0.545613	9606.ENSP00000385523	Peroxisome proliferator-activated receptor alpha; Ligand-activated transcription factor. Key regulator of lipid metabolism. Activated by the endogenous ligand 1-palmitoyl- 2-oleoyl-sn-glycerol-3-phosphocholine (16:0/18:1-GPC). Activated by oleylethanolamide, a naturally occurring lipid that regulates satiety. Receptor for peroxisome proliferators such as hypolipidemic drugs and fatty acids. Regul…
CDK2	Cyclin-dependent kinase 2/cyclin E1	CHEMBL1907605	Kinase	P24941	28	0.603053	0.00189996	0.574634	9606.ENSP00000266970	Cell division protein kinase 2; Serine/threonine-protein kinase involved in the control of the cell cycle; essential for meiosis, but dispensable for mitosis. Phosphorylates CTNNB1, USP37, p53/TP53, NPM1, CDK7, RB1, BRCA2, MYC, NPAT, EZH2. Triggers duplication of centrosomes and DNA. Acts at the G1-S transition to promote the E2F transcriptional program and the initiation of DNA synthesis, and mo…
HSPA1A	Heat shock 70 kDa protein 1	CHEMBL5460	Other cytosolic protein	P0DMV8	27	0.603053	0.00184654	0.575246	9606.ENSP00000364802	Heat shock 70 kDa protein 1A; Molecular chaperone implicated in a wide variety of cellular processes, including protection of the proteome from stress, folding and transport of newly synthesized polypeptides, activation of proteolysis of misfolded proteins and the formation and dissociation of protein complexes. Plays a pivotal role in the protein quality control system, ensuring the correct fold…
IKBKB	Inhibitor of nuclear factor kappa B kinase beta subunit	CHEMBL1991	Kinase	O14920	27	0.603053	0.00196942	0.548054	9606.ENSP00000430684	Inhibitor of kappa light polypeptide gene enhancer in B-cells, kinase beta; Serine kinase that plays an essential role in the NF- kappa-B signaling pathway which is activated by multiple stimuli such as inflammatory cytokines, bacterial or viral products, DNA damages or other cellular stresses. Acts as part of the canonical IKK complex in the conventional pathway of NF-kappa-B activation and phos…
JAK3	Tyrosine-protein kinase JAK3	CHEMBL2148	Kinase	P52333	27	0.603053	0.00213845	0.543366	9606.ENSP00000391676	Tyrosine-protein kinase JAK3; Non-receptor tyrosine kinase involved in various processes such as cell growth, development, or differentiation. Mediates essential signaling events in both innate and adaptive immunity and plays a crucial role in hematopoiesis during T-cells development. In the cytoplasm, plays a pivotal role in signal transduction via its association with type I receptors sharing t…
PTPN6	Protein-tyrosine phosphatase 1C	CHEMBL3166	Phosphatase	P29350	27	0.598485	0.00239363	0.526591	9606.ENSP00000391592	Protein tyrosine phosphatase, non-receptor type 6; Modulates signaling by tyrosine phosphorylated cell surface receptors such as KIT and the EGF receptor/EGFR. The SH2 regions may interact with other cellular components to modulate its own phosphatase activity against interacting substrates. Together with MTUS1, induces UBE2V2 expression upon angiotensin II stimulation. Plays a key role in hemato…
SYK	Tyrosine-protein kinase SYK	CHEMBL2599	Kinase	P43405	27	0.593985	0.00257288	0.546417	9606.ENSP00000364907	Tyrosine-protein kinase SYK; Non-receptor tyrosine kinase which mediates signal transduction downstream of a variety of transmembrane receptors including classical immunoreceptors like the B-cell receptor (BCR). Regulates several biological processes including innate and adaptive immunity, cell adhesion, osteoclast maturation, platelet activation and vascular development. Assembles into signaling…
PTK2B	Protein tyrosine kinase 2 beta	CHEMBL5469	Kinase	Q14289	26	0.598485	0.00260735	0.527264	9606.ENSP00000380638	Calcium-regulated non-receptor proline-rich tyrosine kinase; Non-receptor protein-tyrosine kinase that regulates reorganization of the actin cytoskeleton, cell polarization, cell migration, adhesion, spreading and bone remodeling. Plays a role in the regulation of the humoral immune response, and is required for normal levels of marginal B-cells in the spleen and normal migration of splenic B-cel…
CDK1	Cyclin-dependent kinase 1/cyclin B1	CHEMBL1907602	Other cytosolic protein	P06493	25	0.593985	0.00230603	0.536203	9606.ENSP00000378699	Cell division control protein 2 homolog; Plays a key role in the control of the eukaryotic cell cycle by modulating the centrosome cycle as well as mitotic onset; promotes G2-M transition, and regulates G1 progress and G1-S transition via association with multiple interphase cyclins. Required in higher cells for entry into S-phase and mitosis. Phosphorylates PARVA/actopaxin, APC, AMPH, APC, BARD1…
ERBB4	Receptor protein-tyrosine kinase erbB-4	CHEMBL3009	Kinase	Q15303	25	0.593985	0.00123726	0.577722	9606.ENSP00000342235	V-erb-b2 avian erythroblastic leukemia viral oncogene homolog 4; Tyrosine-protein kinase that plays an essential role as cell surface receptor for neuregulins and EGF family members and regulates development of the heart, the central nervous system and the mammary gland, gene transcription, cell proliferation, differentiation, migration and apoptosis. Required for normal cardiac muscle differenti…
HSPA8	Heat shock cognate 71 kDa protein	CHEMBL1275223	Other cytosolic protein	P11142	25	0.593985	0.0012097	0.599494	9606.ENSP00000432083	Lipopolysaccharide-associated protein 1; Molecular chaperone implicated in a wide variety of cellular processes, including protection of the proteome from stress, folding and transport of newly synthesized polypeptides, activation of proteolysis of misfolded proteins and the formation and dissociation of protein complexes. Plays a pivotal role in the protein quality control system, ensuring the c…
RXRA	Retinoid X receptor alpha	CHEMBL2061	Nuclear receptor	P19793	23	0.585185	0.00365324	0.452394	9606.ENSP00000419692	Nuclear receptor subfamily 2 group B member 1; Receptor for retinoic acid. Retinoic acid receptors bind as heterodimers to their target response elements in response to their ligands, all-trans or 9-cis retinoic acid, and regulate gene expression in various biological processes. The RAR/RXR heterodimers bind to the retinoic acid response elements (RARE) composed of tandem 5'-AGGTCA-3' sites known…
BTK	Tyrosine-protein kinase BTK	CHEMBL5251	Kinase	Q06187	22	0.572464	0.00131507	0.557851	9606.ENSP00000483570	Bruton agammaglobulinemia tyrosine kinase; Non-receptor tyrosine kinase indispensable for B lymphocyte development, differentiation and signaling. Binding of antigen to the B-cell antigen receptor (BCR) triggers signaling that ultimately leads to B-cell activation. After BCR engagement and activation at the plasma membrane, phosphorylates PLCG2 at several sites, igniting the downstream signaling …
NOS2	Nitric oxide synthase, inducible	CHEMBL4481	Enzyme	P35228	22	0.580882	0.0027808	0.505754	9606.ENSP00000327251	Peptidyl-cysteine S-nitrosylase NOS2; Produces nitric oxide (NO) which is a messenger molecule with diverse functions throughout the body. In macrophages, NO mediates tumoricidal and bactericidal actions. Also has nitrosylase activity and mediates cysteine S-nitrosylation of cytoplasmic target proteins such PTGS2/COX2 (By similarity). As component of the iNOS-S100A8/9 transnitrosylase complex inv…
RARA	Retinoic acid receptor alpha	CHEMBL2055	Nuclear receptor	Q96S41	22	0.580882	0.00118214	0.594361	9606.ENSP00000254066	Nuclear receptor subfamily 1 group B member 1; Receptor for retinoic acid. Retinoic acid receptors bind as heterodimers to their target response elements in response to their ligands, all-trans or 9-cis retinoic acid, and regulate gene expression in various biological processes. The RXR/RAR heterodimers bind to the retinoic acid response elements (RARE) composed of tandem 5'-AGGTCA-3' sites known…
NR0B2	Nuclear receptor subfamily 0 group B member 2	CHEMBL5603	Nuclear receptor	Q15466	21	0.572464	0.00124213	0.57265	9606.ENSP00000254227	Nuclear receptor subfamily 0, group B, member 2; Acts as a transcriptional regulator. Acts as a negative regulator of receptor-dependent signaling pathways. Specifically inhibits transactivation of the nuclear receptor with whom it interacts. Inhibits transcriptional activity of NEUROD1 on E-box- containing promoter by interfering with the coactivation function of the p300/CBP-mediated transcript…
PLG	Plasminogen	CHEMBL1801	Protease	P00747	21	0.568345	0.000920166	0.552257	9606.ENSP00000308938	Plasminogen; Plasmin dissolves the fibrin of blood clots and acts as a proteolytic factor in a variety of other processes including embryonic development, tissue remodeling, tumor invasion, and inflammation. In ovulation, weakens the walls of the Graafian follicle. It activates the urokinase-type plasminogen activator, collagenases and several complement zymogens, such as C1 and C5. Cleavage of f…
PRKCB	Protein kinase C beta	CHEMBL3045	Kinase	Q9UEH8	21	0.572464	0.00124423	0.539683	9606.ENSP00000305355	Protein kinase C beta type; Calcium-activated, phospholipid- and diacylglycerol (DAG)-dependent serine/threonine-protein kinase involved in various cellular processes such as regulation of the B-cell receptor (BCR) signalosome, oxidative stress-induced apoptosis, androgen receptor-dependent transcription regulation, insulin signaling and endothelial cells proliferation. Plays a key role in B-cell…
TYK2	Tyrosine-protein kinase TYK2	CHEMBL3553	Kinase	P29597	21	0.576642	0.000350623	0.607595	9606.ENSP00000431885	Non-receptor tyrosine-protein kinase TYK2; Probably involved in intracellular signal transduction by being involved in the initiation of type I IFN signaling. Phosphorylates the interferon-alpha/beta receptor alpha chain; FERM domain containing
YES1	Tyrosine-protein kinase YES	CHEMBL2073	Kinase	P07947	21	0.576642	0.00229773	0.496685	9606.ENSP00000462468	YES proto-oncogene 1, Src family tyrosine kinase; Non-receptor protein tyrosine kinase that is involved in the regulation of cell growth and survival, apoptosis, cell-cell adhesion, cytoskeleton remodeling, and differentiation. Stimulation by receptor tyrosine kinases (RTKs) including EGRF, PDGFR, CSF1R and FGFR leads to recruitment of YES1 to the phosphorylated receptor, and activation and phosp…
PAK1	Serine/threonine-protein kinase PAK 1	CHEMBL4600	Kinase	Q13153	20	0.572464	0.000905899	0.59557	9606.ENSP00000278568	P21 protein (Cdc42/Rac)-activated kinase 1; Protein kinase involved in intracellular signaling pathways downstream of integrins and receptor-type kinases that plays an important role in cytoskeleton dynamics, in cell adhesion, migration, proliferation, apoptosis, mitosis, and in vesicle-mediated transport processes. Can directly phosphorylate BAD and protects cells against apoptosis. Activated by…
MMP1	Matrix metalloproteinase 1	CHEMBL332	Protease	P03956	19	0.568345	0.000113009	0.638241	9606.ENSP00000322788	Matrix metallopeptidase 1 (interstitial collagenase); Cleaves collagens of types I, II, and III at one site in the helical domain. Also cleaves collagens of types VII and X. In case of HIV infection, interacts and cleaves the secreted viral Tat protein, leading to a decrease in neuronal Tat's mediated neurotoxicity; Endogenous ligands
HDAC3	Histone deacetylase 3	CHEMBL1829	Eraser	O15379	16	0.556338	0.000397177	0.563291	9606.ENSP00000302967	Histone deacetylase 3; Responsible for the deacetylation of lysine residues on the N-terminal part of the core histones (H2A, H2B, H3 and H4), and some other non-histone substrates. Histone deacetylation gives a tag for epigenetic repression and plays an important role in transcriptional regulation, cell cycle progression and developmental events. Histone deacetylases act via the formation of lar…
PTPN2	T-cell protein-tyrosine phosphatase	CHEMBL3807	Phosphatase	P17706	16	0.556338	0.00128012	0.461234	9606.ENSP00000311857	Protein tyrosine phosphatase, non-receptor type 2; Non-receptor type tyrosine-specific phosphatase that dephosphorylates receptor protein tyrosine kinases including INSR, EGFR, CSF1R, PDGFR. Also dephosphorylates non-receptor protein tyrosine kinases like JAK1, JAK2, JAK3, Src family kinases, STAT1, STAT3 and STAT6 either in the nucleus or the cytoplasm. Negatively regulates numerous signaling pa…
BCL2	Apoptosis regulator Bcl-2	CHEMBL4860	Other ion channel	P10415	15	0.548611	0.00105196	0.55641	9606.ENSP00000381185	Apoptosis regulator Bcl-2; Suppresses apoptosis in a variety of cell systems including factor-dependent lymphohematopoietic and neural cells. Regulates cell death by controlling the mitochondrial membrane permeability. Appears to function in a feedback loop system with caspases. Inhibits caspase activity either by preventing the release of cytochrome c from the mitochondria and/or by binding to t…
RXRB	Retinoid X receptor beta	CHEMBL1870	Nuclear receptor	P28702	15	0.548611	0.00108595	0.441026	9606.ENSP00000363817	Nuclear receptor subfamily 2 group B member 2; Receptor for retinoic acid. Retinoic acid receptors bind as heterodimers to their target response elements in response to their ligands, all-trans or 9-cis retinoic acid, and regulate gene expression in various biological processes. The RAR/RXR heterodimers bind to the retinoic acid response elements (RARE); Nuclear hormone receptors
HSF1	Heat shock factor protein 1	CHEMBL5869	Other cytosolic protein	Q00613	13	0.544828	0.000218181	0.668939	9606.ENSP00000431512	Heat shock transcription factor 1; Function as a stress-inducible and DNA-binding transcription factor that plays a central role in the transcriptional activation of the heat shock response (HSR), leading to the expression of a large class of molecular chaperones heat shock proteins (HSPs) that protect cells from cellular insults' damage. In unstressed cells, is present in a HSP90-containing mult…
MAP2K3	Dual specificity mitogen-activated protein kinase kinase 3	CHEMBL2109	Kinase	P46734	13	0.537415	0.000199274	0.591409	9606.ENSP00000345083	Dual specificity mitogen-activated protein kinase kinase 3; Dual specificity kinase. Is activated by cytokines and environmental stress in vivo. Catalyzes the concomitant phosphorylation of a threonine and a tyrosine residue in the MAP kinase p38. Part of a signaling cascade that begins with the activation of the adrenergic receptor ADRA1B and leads to the activation of MAPK14; Belongs to the pro…
RARB	Retinoic acid receptor beta	CHEMBL2008	Nuclear receptor	P10826	11	0.526667	0.000132077	0.494019	9606.ENSP00000332296	Nuclear receptor subfamily 1 group B member 2; Receptor for retinoic acid. Retinoic acid receptors bind as heterodimers to their target response elements in response to their ligands, all-trans or 9-cis retinoic acid, and regulate gene expression in various biological processes. The RXR/RAR heterodimers bind to the retinoic acid response elements (RARE) composed of tandem 5'-AGGTCA-3' sites known…
RARG	Retinoic acid receptor gamma	CHEMBL2003	Nuclear receptor	Q9H1I3	11	0.526667	0.000132077	0.494019	9606.ENSP00000388510	Nuclear receptor subfamily 1 group B member 3; Receptor for retinoic acid. Retinoic acid receptors bind as heterodimers to their target response elements in response to their ligands, all-trans or 9-cis retinoic acid, and regulate gene expression in various biological processes. The RAR/RXR heterodimers bind to the retinoic acid response elements (RARE) composed of tandem 5'-AGGTCA-3' sites known…

## Sheet: MCODE CLUSTERS 
Target	Uniprot ID	MCODE Score	Clusters
PTPN1	P18031	16.44	Cluster 1
PIK3CA	P42336	16.491	Cluster 1
ESR1	P03372	16.813	Cluster 1
TERT	O14746	16.8889	Cluster 1
PDGFRB	P09619	17.0513	Cluster 1
HDAC1	Q13547	17.1877	Cluster 1
HSPA5	P11021	17.2987	Cluster 1
PPARG	Q15180	17.5561	Cluster 1
RPS6KB1	P23443	17.67	Cluster 1
MDM2	Q53XW0	17.7718	Cluster 1
AR	P10275	17.8669	Cluster 1
MAPK1	P28482	17.9512	Cluster 1
MMP2	P08253	17.9803	Cluster 1
FGF2	Q9UCS5	18.0363	Cluster 1
SRC	P12931	18.2303	Cluster 1
HSP90AA1	P07900	18.2664	Cluster 1
EGFR	Q9H2C9	18.4693	Cluster 1
CASP3	P42574	18.6047	Cluster 1
AKT1	P31749	18.6481	Cluster 1
MET	P08581	18.6667	Cluster 1
GAPDH	P04406	18.8647	Cluster 1
MAPK3	P27361	18.8711	Cluster 1
KDR	P35968	18.8793	Cluster 1
IGF1R	P08069	19.0196	Cluster 1
PTPN11	Q06124	19.265	Cluster 1
MTOR	P42345	19.3182	Cluster 1
MAPK8	P45983	19.3831	Cluster 1
JAK2	O60674	19.5398	Cluster 1
MMP9	P14780	19.6492	Cluster 1
IL2	P60568	19.6736	Cluster 1
MAP2K1	Q02750	19.7763	Cluster 1
PTK2	Q05397	20.0493	Cluster 1
ERBB2	P04626	20.1301	Cluster 1
CASP8	Q9UQ81	20.3744	Cluster 1
VEGFA	Q9H1W9	20.4324	Cluster 1
CDK2	P24941	13.1738	Cluster 2
ABL1	P00519	13.3264	Cluster 2
CDK1	P06493	14.0351	Cluster 2
PIK3CB	P42338	14.166	Cluster 2
HSP90AB1	P08238	14.2452	Cluster 2
NOS2	P35228	14.386	Cluster 2
IKBKB	O14920	14.6078	Cluster 2
TLR4	Q5VZI9	14.8645	Cluster 2
HSPA1A	P0DMV8	15.0095	Cluster 2
JAK1	P23458	15.1856	Cluster 2
ERBB4	Q15303	15.3263	Cluster 2
NFKB1	P19838	15.381	Cluster 2
PRKCA	P17252	15.4386	Cluster 2
MAPK14	Q16539	15.5707	Cluster 2
NR3C1	P04150	15.6667	Cluster 2
MMP1	P03956	15.7908	Cluster 2
PLG	P00747	15.7908	Cluster 2
PPARA	Q07869	15.8954	Cluster 2
IL6	P05231	16.1156	Cluster 2
CREBBP	Q92793	16.14	Cluster 2
TNF	P01375	16.2134	Cluster 2
YES1	P07947	10.4314	Cluster 3
TYK2	P29597	11.2895	Cluster 3
LYN	P07948	11.3797	Cluster 3
BTK	Q06187	11.7574	Cluster 3
PTK2B	Q14289	12	Cluster 3
SYK	P43405	12.4506	Cluster 3
PTPN6	P29350	12.7273	Cluster 3
JAK3	P52333	12.8063	Cluster 3
RXRA	P19793	8.61988	Cluster 4
NR0B2	Q15466	8.85714	Cluster 4
RARA	Q96S41	10.2667	Cluster 4
RXRB	P28702	6.32381	Cluster 5
RARG	Q9H1I3	7.27273	Cluster 5
RARB	P10826	7.27273	Cluster 5
HDAC3	O15379	5.76471	Unclustered
SP1R1	P21453	6.90909	Unclustered
HSF1	Q00613	7.61538	Unclustered
BCL2	P10415	7.82222	Unclustered
PTPN2	P17706	8.66667	Unclustered
MAP2K3	P46734	9.84848	Unclustered
PAK1	Q13153	9.97895	Unclustered
PRKCB	Q9UEH8	9.99167	Unclustered
HSPA8	P11142	12.6	Unclustered
