# Supplementary material for: Exploring the bioactives and the mechanism of Aegle marmelos in the treatment of Inflammatory bowel disease through network pharmacology and molecular docking approach
Source: Research Square preprint supplement (doi:10.21203/rs.3.rs-3421028/v1), 2023-10-13
Supplement: Supplementary file 6 [file de745f050260f6c5a8dccb22.xlsx]

## Sheet: Details of the worksheets
It comprises of all the targets of indiviual compounds of AM and a combined list of AM targets
Compounds
Aegeline
Marmeline
Isopimpinelline
Methoxsalen
Xanthotoxol
Dictamnine
Luvangetin
3-hydroxycoumarin
4-isopropylbenzaldehyde
Alloimperatorin
Alloimperatorin Methyl
Alloimperatorin Methyl Ether
Auraptene
Bergapten
Citral
Citronellal
Gamma-Fagarine
Nodakenin
Halfordinol
Imperatorin
Isoimperatorin
L-Rhamnose
O-halfordinol
Psoralen
yridine
Scoparone
Scopoletin
Skimmin
Combined Targets of AM

## Sheet: Aegeline
AEGELINE	Target	COOMON NAME	Uniprot ID	ChEMBL ID	Target Class	Probability*	Known actives (3D/2D)	BT ATTRIBUTE
AEGELINE	Matrix metalloproteinase 1	MMP1	P03956	CHEMBL332	Protease	0.127303	547 / 34Â Â Â Â Â	BIO-TARGET
AEGELINE	Matrix metalloproteinase 9	MMP9	P14780	CHEMBL321	Protease	0.119404	450 / 34Â Â Â Â Â	BIO-TARGET
AEGELINE	Matrix metalloproteinase 2	MMP2	P08253	CHEMBL333	Protease	0.119404	475 / 45Â Â Â Â Â	BIO-TARGET
AEGELINE	Melatonin receptor 1A	MTNR1A	P48039	CHEMBL1945	Family A G protein-coupled receptor	0.111502	44 / 130Â Â Â Â Â	BIO-TARGET
AEGELINE	Epidermal growth factor receptor erbB1	EGFR	P00533	CHEMBL203	Kinase	0.111502	487 / 38Â Â Â Â Â	BIO-TARGET
AEGELINE	Anandamide amidohydrolase	FAAH	O00519	CHEMBL2243	Enzyme	0.111502	82 / 0Â Â Â Â Â	BIO-TARGET
AEGELINE	Peroxisome proliferator-activated receptor gamma	PPARG	P37231	CHEMBL235	Nuclear receptor	0.111502	76 / 5Â Â Â Â Â	BIO-TARGET
AEGELINE	Sulfonylurea receptor 2	ABCC9	O60706	CHEMBL1971	Primary active transporter	0.111502	39 / 0Â Â Â Â Â	BIO-TARGET
AEGELINE	Cytochrome P450 17A1	CYP17A1	P05093	CHEMBL3522	Cytochrome P450	0.111502	83 / 0Â Â Â Â Â	BIO-TARGET
AEGELINE	Cannabinoid receptor 2	CNR2	P34972	CHEMBL253	Family A G protein-coupled receptor	0.111502	347 / 13Â Â Â Â Â	BIO-TARGET
AEGELINE	Adenosine A1 receptor (by homology)	ADORA1	P30542	CHEMBL226	Family A G protein-coupled receptor	0.111502	778 / 0Â Â Â Â Â	BIO-TARGET
AEGELINE	HMG-CoA reductase (by homology)	HMGCR	P04035	CHEMBL402	Oxidoreductase	0.111502	221 / 0Â Â Â Â Â	BIO-TARGET
AEGELINE	Adenosine deaminase	ADA	P00813	CHEMBL1910	Hydrolase	0.111502	33 / 0Â Â Â Â Â	BIO-TARGET
AEGELINE	Rho-associated protein kinase 2	ROCK2	O75116	CHEMBL2973	Kinase	0.111502	138 / 0Â Â Â Â Â	BIO-TARGET
AEGELINE	Rho-associated protein kinase 1	ROCK1	Q13464	CHEMBL3231	Kinase	0.111502	71 / 0Â Â Â Â Â	BIO-TARGET
AEGELINE	Phosphodiesterase 2A	PDE2A	O00408	CHEMBL2652	Phosphodiesterase	0.111502	141 / 0Â Â Â Â Â	BIO-TARGET
AEGELINE	Receptor protein-tyrosine kinase erbB-4	ERBB4	Q15303	CHEMBL3009	Kinase	0.111502	12 / 0Â Â Â Â Â	BIO-TARGET
AEGELINE	ADAM17	ADAM17	P78536	CHEMBL3706	Protease	0.111502	329 / 0Â Â Â Â Â	BIO-TARGET
AEGELINE	Phosphodiesterase 10A	PDE10A	Q9Y233	CHEMBL4409	Phosphodiesterase	0.111502	1030 / 0Â Â Â Â Â	BIO-TARGET
AEGELINE	Serine/threonine-protein kinase Chk1	CHEK1	O14757	CHEMBL4630	Kinase	0.111502	141 / 0Â Â Â Â Â	BIO-TARGET
AEGELINE	Melatonin receptor 1B	MTNR1B	P49286	CHEMBL1946	Family A G protein-coupled receptor	0.111502	38 / 87Â Â Â Â Â	BIO-TARGET
AEGELINE	Complement factor D	CFD	P00746	CHEMBL2176771	Protease	0.111502	167 / 0Â Â Â Â Â	BIO-TARGET
AEGELINE	11-beta-hydroxysteroid dehydrogenase 1	HSD11B1	P28845	CHEMBL4235	Enzyme	0.111502	414 / 0Â Â Â Â Â	BIO-TARGET
AEGELINE	Epoxide hydrolase 1	EPHX1	P07099	CHEMBL1968	Protease	0.111502	10 / 0Â Â Â Â Â	BIO-TARGET
AEGELINE	Matrix metalloproteinase 14	MMP14	P50281	CHEMBL3869	Protease	0.111502	131 / 0Â Â Â Â Â	BIO-TARGET
AEGELINE	Matrix metalloproteinase 7	MMP7	P09237	CHEMBL4073	Protease	0.111502	91 / 0Â Â Â Â Â	BIO-TARGET
AEGELINE	ADAM10	ADAM10	O14672	CHEMBL5028	Protease	0.111502	51 / 0Â Â Â Â Â	BIO-TARGET
AEGELINE	MAP kinase ERK2	MAPK1	P28482	CHEMBL4040	Kinase	0.111502	398 / 0Â Â Â Â Â	BIO-TARGET
AEGELINE	Tyrosine-protein kinase SYK	SYK	P43405	CHEMBL2599	Kinase	0.111502	448 / 0Â Â Â Â Â	BIO-TARGET
AEGELINE	Thymidine kinase, cytosolic	TK1	P04183	CHEMBL2883	Transferase	0.111502	12 / 0Â Â Â Â Â	BIO-TARGET
AEGELINE	Toll-like receptor 8	TLR8	Q9NR97	CHEMBL5805	Toll-like and Il-1 receptors	0.111502	6 / 0Â Â Â Â Â	BIO-TARGET
AEGELINE	Toll-like receptor (TLR7/TLR9)	TLR7	Q9NYK1	CHEMBL5936	Toll-like and Il-1 receptors	0.111502	9 / 0Â Â Â Â Â	BIO-TARGET
AEGELINE	Phosphodiesterase 7A	PDE7A	Q13946	CHEMBL3012	Phosphodiesterase	0.111502	61 / 0Â Â Â Â Â	BIO-TARGET
AEGELINE	Nerve growth factor receptor Trk-A	NTRK1	P04629	CHEMBL2815	Kinase	0.111502	257 / 0Â Â Â Â Â	BIO-TARGET
AEGELINE	Carbonic anhydrase VI	CA6	P23280	CHEMBL3025	Lyase	0.111502	21 / 0Â Â Â Â Â	BIO-TARGET
AEGELINE	Carbonic anhydrase IV	CA4	P22748	CHEMBL3729	Lyase	0.111502	37 / 0Â Â Â Â Â	BIO-TARGET
AEGELINE	Metabotropic glutamate receptor 5 (by homology)	GRM5	P41594	CHEMBL3227	Family C G protein-coupled receptor	0.111502	183 / 0Â Â Â Â Â	BIO-TARGET
AEGELINE	Peptidyl-prolyl cis-trans isomerase NIMA-interacting 1	PIN1	Q13526	CHEMBL2288	Enzyme	0.111502	4 / 0Â Â Â Â Â	BIO-TARGET
AEGELINE	Serine/threonine-protein kinase mTOR	MTOR	P42345	CHEMBL2842	Kinase	0.111502	757 / 0Â Â Â Â Â	BIO-TARGET
AEGELINE	PI3-kinase p110-alpha subunit	PIK3CA	P42336	CHEMBL4005	Enzyme	0.111502	1363 / 0Â Â Â Â Â	BIO-TARGET
AEGELINE	Prostanoid EP1 receptor	PTGER1	P34995	CHEMBL1811	Family A G protein-coupled receptor	0.111502	50 / 0Â Â Â Â Â	BIO-TARGET
AEGELINE	Thromboxane A2 receptor	TBXA2R	P21731	CHEMBL2069	Family A G protein-coupled receptor	0.111502	24 / 0Â Â Â Â Â	BIO-TARGET
AEGELINE	GABA-A receptor; alpha-3/beta-3/gamma-2	GABRB3 GABRA3 GABRG2	P28472 P34903 P18507	CHEMBL2094120	Ligand-gated ion channel	0.111502	45 / 0Â Â Â Â Â	BIO-TARGET
AEGELINE	GABA-A receptor; alpha-1/beta-3/gamma-2	GABRB3 GABRG2 GABRA1	P28472 P18507 P14867	CHEMBL2094121	Ligand-gated ion channel	0.111502	44 / 0Â Â Â Â Â	BIO-TARGET
AEGELINE	GABA-A receptor; alpha-5/beta-3/gamma-2	GABRB3 GABRG2 GABRA5	P28472 P18507 P31644	CHEMBL2094122	Ligand-gated ion channel	0.111502	40 / 0Â Â Â Â Â	BIO-TARGET
AEGELINE	GABA-A receptor; alpha-2/beta-3/gamma-2	GABRA2 GABRB3 GABRG2	P47869 P28472 P18507	CHEMBL2094130	Ligand-gated ion channel	0.111502	31 / 0Â Â Â Â Â	BIO-TARGET
AEGELINE	P2X purinoceptor 7	P2RX7	Q99572	CHEMBL4805	Ligand-gated ion channel	0.111502	75 / 0Â Â Â Â Â	BIO-TARGET
AEGELINE	Protein arginine N-methyltransferase 3	PRMT3	O60678	CHEMBL5891	Writer	0.111502	6 / 0Â Â Â Â Â	BIO-TARGET
AEGELINE	Tyrosine-protein kinase JAK3	JAK3	P52333	CHEMBL2148	Kinase	0.111502	295 / 0Â Â Â Â Â	BIO-TARGET
AEGELINE	Cytochrome P450 11B1	CYP11B1	P15538	CHEMBL1908	Cytochrome P450	0.111502	28 / 0Â Â Â Â Â	BIO-TARGET
AEGELINE	Cytochrome P450 11B2	CYP11B2	P19099	CHEMBL2722	Cytochrome P450	0.111502	30 / 0Â Â Â Â Â	BIO-TARGET
AEGELINE	MAP kinase p38 alpha	MAPK14	Q16539	CHEMBL260	Kinase	0.111502	450 / 0Â Â Â Â Â	BIO-TARGET
AEGELINE	PI3-kinase p110-delta subunit	PIK3CD	O00329	CHEMBL3130	Enzyme	0.111502	464 / 0Â Â Â Â Â	BIO-TARGET
AEGELINE	PI3-kinase p110-gamma subunit	PIK3CG	P48736	CHEMBL3267	Enzyme	0.111502	429 / 0Â Â Â Â Â	BIO-TARGET
AEGELINE	Presenilin 1	PSEN1	P49768	CHEMBL2473	Other ion channel	0.111502	5 / 0Â Â Â Â Â	BIO-TARGET
AEGELINE	Sodium channel protein type IX alpha subunit	SCN9A	Q15858	CHEMBL4296	Voltage-gated ion channel	0.111502	952 / 0Â Â Â Â Â	BIO-TARGET
AEGELINE	Tyrosine-protein kinase ABL	ABL1	P00519	CHEMBL1862	Kinase	0.111502	129 / 0Â Â Â Â Â	BIO-TARGET
AEGELINE	Cyclin-dependent kinase 1/cyclin B1	CDK1 CCNB1	P06493 P14635	CHEMBL1907602	Other cytosolic protein	0.111502	51 / 0Â Â Â Â Â	BIO-TARGET
AEGELINE	Cyclin-dependent kinase 2/cyclin E1	CCNE1 CDK2	P24864 P24941	CHEMBL1907605	Kinase	0.111502	99 / 0Â Â Â Â Â	BIO-TARGET
AEGELINE	Cyclin-dependent kinase 7/ cyclin H	CDK7 CCNH	P50613 P51946	CHEMBL2111288	Other cytosolic protein	0.111502	51 / 0Â Â Â Â Â	BIO-TARGET
AEGELINE	Transient receptor potential cation channel subfamily V member 4	TRPV4	Q9HBA0	CHEMBL3119	Voltage-gated ion channel	0.111502	9 / 0Â Â Â Â Â	BIO-TARGET
AEGELINE	Tyrosine-protein kinase BTK	BTK	Q06187	CHEMBL5251	Kinase	0.111502	81 / 0Â Â Â Â Â	BIO-TARGET
AEGELINE	Corticotropin releasing factor receptor 1	CRHR1	P34998	CHEMBL1800	Family B G protein-coupled receptor	0.111502	212 / 0Â Â Â Â Â	BIO-TARGET
AEGELINE	Cyclin-dependent kinase 5/CDK5 activator 1	CDK5R1 CDK5	Q15078 Q00535	CHEMBL1907600	Kinase	0.111502	138 / 0Â Â Â Â Â	BIO-TARGET
AEGELINE	Eukaryotic initiation factor 4A-I	EIF4A1	P60842	CHEMBL2052028	Hydrolase	0.111502	15 / 0Â Â Â Â Â	BIO-TARGET
AEGELINE	Tyrosine-protein kinase JAK2	JAK2	O60674	CHEMBL2971	Kinase	0.111502	463 / 0Â Â Â Â Â	BIO-TARGET
AEGELINE	Bradykinin B1 receptor	BDKRB1	P46663	CHEMBL4308	Family A G protein-coupled receptor	0.111502	77 / 0Â Â Â Â Â	BIO-TARGET
AEGELINE	Endothelial lipase	LIPG	Q9Y5X9	CHEMBL5080	Hydrolase	0.111502	25 / 0Â Â Â Â Â	BIO-TARGET
AEGELINE	Caspase-3	CASP3	P42574	CHEMBL2334	Protease	0.111502	199 / 0Â Â Â Â Â	BIO-TARGET
AEGELINE	Interleukin-8 receptor B	CXCR2	P25025	CHEMBL2434	Family A G protein-coupled receptor	0.111502	222 / 0Â Â Â Â Â	BIO-TARGET
AEGELINE	Poly [ADP-ribose] polymerase-1	PARP1	P09874	CHEMBL3105	Enzyme	0.111502	172 / 0Â Â Â Â Â	BIO-TARGET
AEGELINE	Caspase-7	CASP7	P55210	CHEMBL3468	Protease	0.111502	129 / 0Â Â Â Â Â	BIO-TARGET
AEGELINE	Phosphodiesterase 9A	PDE9A	O76083	CHEMBL3535	Phosphodiesterase	0.111502	56 / 0Â Â Â Â Â	BIO-TARGET
AEGELINE	Caspase-8	CASP8	Q14790	CHEMBL3776	Protease	0.111502	105 / 0Â Â Â Â Â	BIO-TARGET
AEGELINE	Caspase-1	CASP1	P29466	CHEMBL4801	Protease	0.111502	148 / 0Â Â Â Â Â	BIO-TARGET
AEGELINE	C-X3-C chemokine receptor 1	CX3CR1	P49238	CHEMBL4843	Family A G protein-coupled receptor	0.111502	46 / 0Â Â Â Â Â	BIO-TARGET
AEGELINE	Smoothened homolog	SMO	Q99835	CHEMBL5971	Frizzled family G protein-coupled receptor	0.111502	57 / 0Â Â Â Â Â	BIO-TARGET
AEGELINE	Bromodomain-containing protein 4	BRD4	O60885	CHEMBL1163125	Reader	0.111502	130 / 0Â Â Â Â Â	BIO-TARGET
AEGELINE	Serine/threonine-protein kinase PIM1	PIM1	P11309	CHEMBL2147	Kinase	0.111502	172 / 0Â Â Â Â Â	BIO-TARGET
AEGELINE	Serine/threonine-protein kinase PIM2	PIM2	Q9P1W9	CHEMBL4523	Kinase	0.111502	114 / 0Â Â Â Â Â	BIO-TARGET
AEGELINE	CREB-binding protein/p53	CREBBP	Q92793	CHEMBL5747	Writer	0.111502	22 / 0Â Â Â Â Â	BIO-TARGET
AEGELINE	Matrix metalloproteinase 3	MMP3	P08254	CHEMBL283	Protease	0.111502	313 / 0Â Â Â Â Â	BIO-TARGET
AEGELINE	P2X purinoceptor 3	P2RX3	P56373	CHEMBL2998	Ligand-gated ion channel	0.111502	347 / 0Â Â Â Â Â	BIO-TARGET
AEGELINE	Tyrosine-protein kinase TYK2	TYK2	P29597	CHEMBL3553	Kinase	0.111502	101 / 0Â Â Â Â Â	BIO-TARGET
AEGELINE	Protein-tyrosine phosphatase 1B	PTPN1	P18031	CHEMBL335	Phosphatase	0.111502	130 / 18Â Â Â Â Â	BIO-TARGET
AEGELINE	DNA topoisomerase I	TOP1	P11387	CHEMBL1781	Isomerase	0.111502	84 / 0Â Â Â Â Â	BIO-TARGET
AEGELINE	Hexokinase type IV	GCK	P35557	CHEMBL3820	Enzyme	0.111502	182 / 0Â Â Â Â Â	BIO-TARGET
AEGELINE	Poly [ADP-ribose] polymerase 3	PARP3	Q9Y6F1	CHEMBL5083	Enzyme	0.111502	2 / 0Â Â Â Â Â	BIO-TARGET
AEGELINE	Cyclin-dependent kinase 2/cyclin E	CCNE2 CDK2 CCNE1	O96020 P24941 P24864	CHEMBL2094126	Other cytosolic protein	0.111502	98 / 0Â Â Â Â Â	BIO-TARGET
AEGELINE	Type-1 angiotensin II receptor (by homology)	AGTR1	P30556	CHEMBL227	Family A G protein-coupled receptor	0.111502	264 / 0Â Â Â Â Â	BIO-TARGET
AEGELINE	Cholecystokinin B receptor	CCKBR	P32239	CHEMBL298	Family A G protein-coupled receptor	0.111502	163 / 0Â Â Â Â Â	BIO-TARGET
AEGELINE	c-Jun N-terminal kinase 1	MAPK8	P45983	CHEMBL2276	Kinase	0.111502	160 / 0Â Â Â Â Â	BIO-TARGET
AEGELINE	Caspase-6	CASP6	P55212	CHEMBL3308	Protease	0.111502	29 / 0Â Â Â Â Â	BIO-TARGET
AEGELINE	Hormone sensitive lipase	LIPE	Q05469	CHEMBL3590	Enzyme	0.111502	28 / 0Â Â Â Â Â	BIO-TARGET
AEGELINE	Dual specificity protein kinase TTK	TTK	P33981	CHEMBL3983	Kinase	0.111502	25 / 0Â Â Â Â Â	BIO-TARGET
AEGELINE	Serine/threonine-protein kinase PAK 1	PAK1	Q13153	CHEMBL4600	Kinase	0.111502	41 / 0Â Â Â Â Â	BIO-TARGET
AEGELINE	Proto-oncogene tyrosine-protein kinase MER	MERTK	Q12866	CHEMBL5331	Kinase	0.111502	46 / 0Â Â Â Â Â	BIO-TARGET
AEGELINE	CDK9/cyclin T1	CDK9 CCNT1	P50750 O60563	CHEMBL2111389	Other cytosolic protein	0.111502	44 / 0Â Â Â Â Â	BIO-TARGET
AEGELINE	Cyclin-dependent kinase 7	CDK7	P50613	CHEMBL3055	Kinase	0.111502	32 / 0Â Â Â Â Â	BIO-TARGET
AEGELINE	Transient receptor potential cation channel subfamily M member 8	TRPM8	Q7Z2W7	CHEMBL1075319	Voltage-gated ion channel	0.111502	6 / 0Â Â Â Â Â	BIO-TARGET

## Sheet: Marmeline
MARMELINE	Target	Common name	Uniprot ID	ChEMBL ID	Target Class	Probability*	Known actives (3D/2D)	BIO-TARGET
MARMELINE	Matrix metalloproteinase 9	MMP9	P14780	CHEMBL321	Protease	0.10934	214 / 11Â Â Â Â Â	BIO-TARGET
MARMELINE	Matrix metalloproteinase 1	MMP1	P03956	CHEMBL332	Protease	0.10934	232 / 11Â Â Â Â Â	BIO-TARGET
MARMELINE	Hormone sensitive lipase	LIPE	Q05469	CHEMBL3590	Enzyme	0.10934	15 / 0Â Â Â Â Â	BIO-TARGET
MARMELINE	Anandamide amidohydrolase	FAAH	O00519	CHEMBL2243	Enzyme	0.10934	69 / 0Â Â Â Â Â	BIO-TARGET
MARMELINE	Protein farnesyltransferase	FNTA FNTB	P49354 P49356	CHEMBL2094108	Enzyme	0.10934	40 / 0Â Â Â Â Â	BIO-TARGET
MARMELINE	Cannabinoid receptor 2	CNR2	P34972	CHEMBL253	Family A G protein-coupled receptor	0.10934	196 / 9Â Â Â Â Â	BIO-TARGET
MARMELINE	Peroxisome proliferator-activated receptor gamma	PPARG	P37231	CHEMBL235	Nuclear receptor	0.10934	39 / 5Â Â Â Â Â	BIO-TARGET
MARMELINE	Cyclin T1	CCNT1	O60563	CHEMBL2108	Other cytosolic protein	0.10934	12 / 0Â Â Â Â Â	BIO-TARGET
MARMELINE	Tyrosine-protein kinase ABL	ABL1	P00519	CHEMBL1862	Kinase	0.10934	83 / 0Â Â Â Â Â	BIO-TARGET
MARMELINE	Nociceptin receptor	OPRL1	P41146	CHEMBL2014	Family A G protein-coupled receptor	0.10934	23 / 0Â Â Â Â Â	BIO-TARGET
MARMELINE	Sphingosine 1-phosphate receptor Edg-1	S1PR1	P21453	CHEMBL4333	Family A G protein-coupled receptor	0.10934	8 / 0Â Â Â Â Â	BIO-TARGET
MARMELINE	Muscle glycogen synthase	GYS1	P13807	CHEMBL4000	Enzyme	0.10934	9 / 0Â Â Â Â Â	BIO-TARGET
MARMELINE	Thrombin and coagulation factor X	F10	P00742	CHEMBL244	Protease	0.10934	212 / 0Â Â Â Â Â	BIO-TARGET
MARMELINE	Tyrosine-protein kinase BTK	BTK	Q06187	CHEMBL5251	Kinase	0.10934	97 / 0Â Â Â Â Â	BIO-TARGET
MARMELINE	Matrix metalloproteinase 2	MMP2	P08253	CHEMBL333	Protease	0.10934	236 / 20Â Â Â Â Â	BIO-TARGET
MARMELINE	Phosphodiesterase 10A (by homology)	PDE10A	Q9Y233	CHEMBL4409	Phosphodiesterase	0.10934	763 / 0Â Â Â Â Â	BIO-TARGET
MARMELINE	Metabotropic glutamate receptor 5 (by homology)	GRM5	P41594	CHEMBL3227	Family C G protein-coupled receptor	0.10934	101 / 0Â Â Â Â Â	BIO-TARGET
MARMELINE	Beta-secretase 1	BACE1	P56817	CHEMBL4822	Protease	0.10934	590 / 0Â Â Â Â Â	BIO-TARGET
MARMELINE	Cytochrome P450 17A1	CYP17A1	P05093	CHEMBL3522	Cytochrome P450	0.10934	20 / 0Â Â Â Â Â	BIO-TARGET
MARMELINE	Neuropeptide Y receptor type 2	NPY2R	P49146	CHEMBL4018	Family A G protein-coupled receptor	0.10934	3 / 0Â Â Â Â Â	BIO-TARGET
MARMELINE	Voltage-gated potassium channel subunit Kv1.5	KCNA5	P22460	CHEMBL4306	Voltage-gated ion channel	0.10934	62 / 0Â Â Â Â Â	BIO-TARGET
MARMELINE	Insulin-like growth factor I receptor	IGF1R	P08069	CHEMBL1957	Kinase	0.10934	138 / 0Â Â Â Â Â	BIO-TARGET
MARMELINE	Dual specificity mitogen-activated protein kinase kinase 1	MAP2K1	Q02750	CHEMBL3587	Kinase	0.10934	59 / 0Â Â Â Â Â	BIO-TARGET
MARMELINE	Smoothened homolog	SMO	Q99835	CHEMBL5971	Frizzled family G protein-coupled receptor	0.10934	40 / 0Â Â Â Â Â	BIO-TARGET
MARMELINE	MAP kinase p38 alpha	MAPK14	Q16539	CHEMBL260	Kinase	0.10934	274 / 0Â Â Â Â Â	BIO-TARGET
MARMELINE	Adenosine deaminase	ADA	P00813	CHEMBL1910	Hydrolase	0.10934	19 / 0Â Â Â Â Â	BIO-TARGET
MARMELINE	GABA receptor alpha-2 subunit	GABRA2	P47869	CHEMBL4956	Ligand-gated ion channel	0.10934	2 / 0Â Â Â Â Â	BIO-TARGET
MARMELINE	ADAM17	ADAM17	P78536	CHEMBL3706	Protease	0.10934	200 / 0Â Â Â Â Â	BIO-TARGET
MARMELINE	Bradykinin B1 receptor	BDKRB1	P46663	CHEMBL4308	Family A G protein-coupled receptor	0.10934	50 / 0Â Â Â Â Â	BIO-TARGET
MARMELINE	Tyrosine-protein kinase SYK	SYK	P43405	CHEMBL2599	Kinase	0.10934	299 / 0Â Â Â Â Â	BIO-TARGET
MARMELINE	Matrix metalloproteinase 3	MMP3	P08254	CHEMBL283	Protease	0.10934	159 / 0Â Â Â Â Â	BIO-TARGET
MARMELINE	Sodium channel protein type IX alpha subunit	SCN9A	Q15858	CHEMBL4296	Voltage-gated ion channel	0.10934	91 / 0Â Â Â Â Â	BIO-TARGET
MARMELINE	Voltage-gated potassium channel, IKs; KCNQ1(Kv7.1)/KCNE1(MinK)	KCNE1 KCNQ1	P15382 P51787	CHEMBL2221347	Voltage-gated ion channel	0.10934	4 / 0Â Â Â Â Â	BIO-TARGET
MARMELINE	Lysosomal Pro-X carboxypeptidase	PRCP	P42785	CHEMBL2335	Protease	0.10934	17 / 0Â Â Â Â Â	BIO-TARGET
MARMELINE	Vasopressin V2 receptor	AVPR2	P30518	CHEMBL1790	Family A G protein-coupled receptor	0.10934	41 / 0Â Â Â Â Â	BIO-TARGET
MARMELINE	Serine/threonine-protein kinase PIM1	PIM1	P11309	CHEMBL2147	Kinase	0.10934	36 / 0Â Â Â Â Â	BIO-TARGET
MARMELINE	Serine/threonine-protein kinase PIM2	PIM2	Q9P1W9	CHEMBL4523	Kinase	0.10934	24 / 0Â Â Â Â Â	BIO-TARGET
MARMELINE	Serine/threonine-protein kinase PIM3	PIM3	Q86V86	CHEMBL5407	Kinase	0.10934	15 / 0Â Â Â Â Â	BIO-TARGET
MARMELINE	Mitogen-activated protein kinase kinase kinase 11	MAP3K11	Q16584	CHEMBL2708	Kinase	0.10934	5 / 0Â Â Â Â Â	BIO-TARGET
MARMELINE	Mitogen-activated protein kinase kinase kinase 9	MAP3K9	P80192	CHEMBL2872	Kinase	0.10934	6 / 0Â Â Â Â Â	BIO-TARGET
MARMELINE	Mitogen-activated protein kinase kinase kinase 10	MAP3K10	Q02779	CHEMBL2873	Kinase	0.10934	4 / 0Â Â Â Â Â	BIO-TARGET
MARMELINE	C-C chemokine receptor type 1	CCR1	P32246	CHEMBL2413	Family A G protein-coupled receptor	0.10934	87 / 0Â Â Â Â Â	BIO-TARGET
MARMELINE	C-X3-C chemokine receptor 1	CX3CR1	P49238	CHEMBL4843	Family A G protein-coupled receptor	0.10934	45 / 0Â Â Â Â Â	BIO-TARGET
MARMELINE	Vasopressin V1a receptor (by homology)	AVPR1A	P37288	CHEMBL1889	Family A G protein-coupled receptor	0.10934	40 / 0Â Â Â Â Â	BIO-TARGET
MARMELINE	Orexin receptor 2	HCRTR2	O43614	CHEMBL4792	Family A G protein-coupled receptor	0.10934	41 / 0Â Â Â Â Â	BIO-TARGET
MARMELINE	Orexin receptor 1	HCRTR1	O43613	CHEMBL5113	Family A G protein-coupled receptor	0.10934	33 / 0Â Â Â Â Â	BIO-TARGET
MARMELINE	Caspase-3	CASP3	P42574	CHEMBL2334	Protease	0.10934	119 / 0Â Â Â Â Â	BIO-TARGET
MARMELINE	Caspase-6	CASP6	P55212	CHEMBL3308	Protease	0.10934	24 / 0Â Â Â Â Â	BIO-TARGET
MARMELINE	Caspase-7	CASP7	P55210	CHEMBL3468	Protease	0.10934	76 / 0Â Â Â Â Â	BIO-TARGET
MARMELINE	Caspase-8	CASP8	Q14790	CHEMBL3776	Protease	0.10934	89 / 0Â Â Â Â Â	BIO-TARGET
MARMELINE	Sphingosine 1-phosphate receptor Edg-3	S1PR3	Q99500	CHEMBL3892	Family A G protein-coupled receptor	0.10934	11 / 0Â Â Â Â Â	BIO-TARGET
MARMELINE	Tyrosine kinase non-receptor protein 2	TNK2	Q07912	CHEMBL4599	Kinase	0.10934	83 / 0Â Â Â Â Â	BIO-TARGET
MARMELINE	Caspase-1	CASP1	P29466	CHEMBL4801	Protease	0.10934	124 / 0Â Â Â Â Â	BIO-TARGET
MARMELINE	Sulfonylurea receptor 2	ABCC9	O60706	CHEMBL1971	Primary active transporter	0.10934	12 / 0Â Â Â Â Â	BIO-TARGET
MARMELINE	Interleukin-8 receptor B	CXCR2	P25025	CHEMBL2434	Family A G protein-coupled receptor	0.10934	140 / 0Â Â Â Â Â	BIO-TARGET
MARMELINE	Sphingosine 1-phosphate receptor Edg-5	S1PR2	O95136	CHEMBL2955	Family A G protein-coupled receptor	0.10934	22 / 0Â Â Â Â Â	BIO-TARGET
MARMELINE	Tyrosine-protein kinase JAK3	JAK3	P52333	CHEMBL2148	Kinase	0.10934	90 / 0Â Â Â Â Â	BIO-TARGET
MARMELINE	Adenosine A1 receptor (by homology)	ADORA1	P30542	CHEMBL226	Family A G protein-coupled receptor	0.10934	350 / 0Â Â Â Â Â	BIO-TARGET
MARMELINE	Nerve growth factor receptor Trk-A	NTRK1	P04629	CHEMBL2815	Kinase	0.10934	97 / 0Â Â Â Â Â	BIO-TARGET
MARMELINE	Tyrosine-protein kinase JAK2	JAK2	O60674	CHEMBL2971	Kinase	0.10934	145 / 0Â Â Â Â Â	BIO-TARGET
MARMELINE	Cannabinoid receptor 1	CNR1	P21554	CHEMBL218	Family A G protein-coupled receptor	0.10934	242 / 5Â Â Â Â Â	BIO-TARGET
MARMELINE	Prostaglandin E synthase	PTGES	O14684	CHEMBL5658	Enzyme	0.10934	41 / 0Â Â Â Â Â	BIO-TARGET
MARMELINE	G-protein coupled receptor 55	GPR55	Q9Y2T6	CHEMBL1075322	Family A G protein-coupled receptor	0.10934	11 / 0Â Â Â Â Â	BIO-TARGET
MARMELINE	Cyclin-dependent kinase 2	CDK2	P24941	CHEMBL301	Kinase	0.10934	116 / 0Â Â Â Â Â	BIO-TARGET
MARMELINE	Cyclin-dependent kinase 9	CDK9	P50750	CHEMBL3116	Kinase	0.10934	21 / 0Â Â Â Â Â	BIO-TARGET
MARMELINE	MAP kinase ERK2	MAPK1	P28482	CHEMBL4040	Kinase	0.10934	265 / 0Â Â Â Â Â	BIO-TARGET
MARMELINE	Protein tyrosine kinase 2 beta	PTK2B	Q14289	CHEMBL5469	Kinase	0.10934	16 / 0Â Â Â Â Â	BIO-TARGET
MARMELINE	Protein-tyrosine phosphatase 1C	PTPN6	P29350	CHEMBL3166	Phosphatase	0.10934	0 / 2Â Â Â Â Â	BIO-TARGET
MARMELINE	Epidermal growth factor receptor erbB1	EGFR	P00533	CHEMBL203	Kinase	0.10934	275 / 28Â Â Â Â Â	BIO-TARGET
MARMELINE	Oxytocin receptor	OXTR	P30559	CHEMBL2049	Family A G protein-coupled receptor	0.10934	91 / 0Â Â Â Â Â	BIO-TARGET
MARMELINE	Serine/threonine-protein kinase mTOR	MTOR	P42345	CHEMBL2842	Kinase	0.10934	447 / 0Â Â Â Â Â	BIO-TARGET
MARMELINE	PI3-kinase p110-alpha subunit	PIK3CA	P42336	CHEMBL4005	Enzyme	0.10934	578 / 0Â Â Â Â Â	BIO-TARGET
MARMELINE	dUTP pyrophosphatase	DUT	P33316	CHEMBL5203	Enzyme	0.10934	20 / 0Â Â Â Â Â	BIO-TARGET
MARMELINE	Cyclin-dependent kinase 5/CDK5 activator 1	CDK5R1 CDK5	Q15078 Q00535	CHEMBL1907600	Kinase	0.10934	82 / 0Â Â Â Â Â	BIO-TARGET
MARMELINE	Nicotinamide phosphoribosyltransferase	NAMPT	P43490	CHEMBL1744525	Enzyme	0.10934	46 / 0Â Â Â Â Â	BIO-TARGET
MARMELINE	Mitogen-activated protein kinase kinase kinase 5	MAP3K5	Q99683	CHEMBL5285	Kinase	0.10934	11 / 0Â Â Â Â Â	BIO-TARGET
MARMELINE	c-Jun N-terminal kinase 3	MAPK10	P53779	CHEMBL2637	Kinase	0.10934	73 / 0Â Â Â Â Â	BIO-TARGET
MARMELINE	Hexokinase type IV	GCK	P35557	CHEMBL3820	Enzyme	0.10934	159 / 0Â Â Â Â Â	BIO-TARGET
MARMELINE	Cathepsin L	CTSL	P07711	CHEMBL3837	Protease	0.10934	81 / 0Â Â Â Â Â	BIO-TARGET
MARMELINE	Voltage-gated calcium channel alpha2/delta subunit 1	CACNA2D1	P54289	CHEMBL1919	Calcium channel auxiliary subunit alpha2delta family	0.10934	5 / 0Â Â Â Â Â	BIO-TARGET
MARMELINE	Potassium channel subfamily K member 3	KCNK3	O14649	CHEMBL2321613	Voltage-gated ion channel	0.10934	9 / 0Â Â Â Â Â	BIO-TARGET
MARMELINE	Beta secretase 2	BACE2	Q9Y5Z0	CHEMBL2525	Protease	0.10934	44 / 0Â Â Â Â Â	BIO-TARGET
MARMELINE	Cathepsin E	CTSE	P14091	CHEMBL3092	Protease	0.10934	13 / 0Â Â Â Â Â	BIO-TARGET
MARMELINE	Voltage-gated calcium channel alpha2/delta subunit 2	CACNA2D2	Q9NY47	CHEMBL3896	Calcium channel auxiliary subunit alpha2delta family	0.10934	4 / 0Â Â Â Â Â	BIO-TARGET
MARMELINE	Cathepsin G	CTSG	P08311	CHEMBL4071	Protease	0.10934	7 / 0Â Â Â Â Â	BIO-TARGET
MARMELINE	Protein-tyrosine phosphatase 1B	PTPN1	P18031	CHEMBL335	Phosphatase	0.10934	39 / 17Â Â Â Â Â	BIO-TARGET
MARMELINE	Type-1 angiotensin II receptor	AGTR1	P30556	CHEMBL227	Family A G protein-coupled receptor	0.10934	153 / 0Â Â Â Â Â	BIO-TARGET
MARMELINE	Tyrosine-protein kinase SRC	SRC	P12931	CHEMBL267	Kinase	0.10934	125 / 0Â Â Â Â Â	BIO-TARGET
MARMELINE	Tyrosine-protein kinase TYK2	TYK2	P29597	CHEMBL3553	Kinase	0.10934	24 / 0Â Â Â Â Â	BIO-TARGET
MARMELINE	Cyclin-dependent kinase 2/cyclin A	CDK2 CCNA1 CCNA2	P24941 P78396 P20248	CHEMBL2094128	Other cytosolic protein	0.10934	58 / 0Â Â Â Â Â	BIO-TARGET
MARMELINE	Dual-specificity tyrosine-phosphorylation regulated kinase 1A	DYRK1A	Q13627	CHEMBL2292	Kinase	0.10934	54 / 0Â Â Â Â Â	BIO-TARGET
MARMELINE	Rho-associated protein kinase 2	ROCK2	O75116	CHEMBL2973	Kinase	0.10934	80 / 0Â Â Â Â Â	BIO-TARGET
MARMELINE	Rho-associated protein kinase 1	ROCK1	Q13464	CHEMBL3231	Kinase	0.10934	37 / 0Â Â Â Â Â	BIO-TARGET
MARMELINE	c-Jun N-terminal kinase 1	MAPK8	P45983	CHEMBL2276	Kinase	0.10934	77 / 0Â Â Â Â Â	BIO-TARGET
MARMELINE	Interleukin-1 receptor-associated kinase 4	IRAK4	Q9NWZ3	CHEMBL3778	Kinase	0.10934	23 / 0Â Â Â Â Â	BIO-TARGET
MARMELINE	Nuclear receptor ROR-gamma	RORC	P51449	CHEMBL1741186	Nuclear receptor	0.10934	13 / 0Â Â Â Â Â	BIO-TARGET
MARMELINE	Cyclin-dependent kinase 1/cyclin B	CCNB3 CDK1 CCNB1 CCNB2	Q8WWL7 P06493 P14635 O95067	CHEMBL2094127	Other cytosolic protein	0.10934	26 / 0Â Â Â Â Â	BIO-TARGET
MARMELINE	Cyclin-dependent kinase 5/CDK5 activator 1	CDK5	Q00535	CHEMBL4036	Kinase	0.10934	43 / 0Â Â Â Â Â	BIO-TARGET
MARMELINE	Aldo-keto-reductase family 1 member C3	AKR1C3	P42330	CHEMBL4681	Enzyme	0.10934	11 / 0Â Â Â Â Â	BIO-TARGET
MARMELINE	Bile acid receptor FXR	NR1H4	Q96RI1	CHEMBL2047	Nuclear receptor	0.10934	31 / 0Â Â Â Â Â	BIO-TARGET

## Sheet: Isopimpinellin
ISOPIMPINELLIN	Target	Common name	Uniprot ID	ChEMBL ID	Target Class	Probability*	Known actives (3D/2D)	BIO-TARGET
ISOPIMPINELLIN	Acetylcholinesterase	ACHE	P22303	CHEMBL220	Hydrolase	0.0898721	5 / 33Â Â Â Â Â	BIO-TARGET
ISOPIMPINELLIN	Cytochrome P450 1A2	CYP1A2	P05177	CHEMBL3356	Cytochrome P450	0.0898721	2 / 3Â Â Â Â Â	BIO-TARGET
ISOPIMPINELLIN	Carbonic anhydrase II	CA2	P00918	CHEMBL205	Lyase	0.062622	32 / 6Â Â Â Â Â	BIO-TARGET
ISOPIMPINELLIN	Carbonic anhydrase I	CA1	P00915	CHEMBL261	Lyase	0.0535561	25 / 14Â Â Â Â Â	BIO-TARGET
ISOPIMPINELLIN	Carbonic anhydrase XII	CA12	O43570	CHEMBL3242	Lyase	0.0535561	19 / 32Â Â Â Â Â	BIO-TARGET
ISOPIMPINELLIN	Carbonic anhydrase IX	CA9	Q16790	CHEMBL3594	Lyase	0.0535561	23 / 42Â Â Â Â Â	BIO-TARGET
ISOPIMPINELLIN	Voltage-gated potassium channel subunit Kv1.3	KCNA3	P22001	CHEMBL4633	Voltage-gated ion channel	0.0535561	0 / 13Â Â Â Â Â	BIO-TARGET
ISOPIMPINELLIN	Carbonic anhydrase VII	CA7	P43166	CHEMBL2326	Lyase	0.0535561	6 / 17Â Â Â Â Â	BIO-TARGET
ISOPIMPINELLIN	Carbonic anhydrase XIII	CA13	Q8N1Q1	CHEMBL3912	Lyase	0.0535561	6 / 19Â Â Â Â Â	BIO-TARGET
ISOPIMPINELLIN	Beta-secretase 1	BACE1	P56817	CHEMBL4822	Protease	0.0535561	4 / 7Â Â Â Â Â	BIO-TARGET
ISOPIMPINELLIN	Carbonyl reductase [NADPH] 1	CBR1	P16152	CHEMBL5586	Enzyme	0.0535561	0 / 1Â Â Â Â Â	BIO-TARGET
ISOPIMPINELLIN	Arachidonate 5-lipoxygenase	ALOX5	P09917	CHEMBL215	Oxidoreductase	0.0535561	15 / 1Â Â Â Â Â	BIO-TARGET
ISOPIMPINELLIN	Alkaline phosphatase, tissue-nonspecific isozyme	ALPL	P05186	CHEMBL5979	Enzyme	0.0535561	22 / 0Â Â Â Â Â	BIO-TARGET
ISOPIMPINELLIN	Serine/threonine-protein kinase Aurora-B	AURKB	Q96GD4	CHEMBL2185	Kinase	0.0535561	7 / 3Â Â Â Â Â	BIO-TARGET
ISOPIMPINELLIN	Serine/threonine-protein kinase Aurora-A	AURKA	O14965	CHEMBL4722	Kinase	0.0535561	13 / 1Â Â Â Â Â	BIO-TARGET
ISOPIMPINELLIN	Tyrosine-protein kinase JAK1	JAK1	P23458	CHEMBL2835	Kinase	0.0535561	16 / 0Â Â Â Â Â	BIO-TARGET
ISOPIMPINELLIN	Tyrosine-protein kinase JAK2	JAK2	O60674	CHEMBL2971	Kinase	0.0535561	19 / 0Â Â Â Â Â	BIO-TARGET
ISOPIMPINELLIN	PI3-kinase p110-alpha subunit	PIK3CA	P42336	CHEMBL4005	Enzyme	0.0535561	23 / 0Â Â Â Â Â	BIO-TARGET
ISOPIMPINELLIN	Monoamine oxidase B	MAOB	P27338	CHEMBL2039	Oxidoreductase	0.0535561	9 / 53Â Â Â Â Â	BIO-TARGET
ISOPIMPINELLIN	G-protein coupled receptor 35	GPR35	Q9HC97	CHEMBL1293267	Family A G protein-coupled receptor	0.0535561	0 / 1Â Â Â Â Â	BIO-TARGET
ISOPIMPINELLIN	Aldose reductase	AKR1B1	P15121	CHEMBL1900	Enzyme	0.0535561	0 / 19Â Â Â Â Â	BIO-TARGET
ISOPIMPINELLIN	Vascular endothelial growth factor receptor 3	FLT4	P35916	CHEMBL1955	Kinase	0.0535561	0 / 1Â Â Â Â Â	BIO-TARGET
ISOPIMPINELLIN	Insulin receptor	INSR	P06213	CHEMBL1981	Kinase	0.0535561	0 / 1Â Â Â Â Â	BIO-TARGET
ISOPIMPINELLIN	Hepatocyte growth factor receptor	MET	P08581	CHEMBL3717	Kinase	0.0535561	0 / 2Â Â Â Â Â	BIO-TARGET
ISOPIMPINELLIN	Serine/threonine-protein kinase PLK4	PLK4	O00444	CHEMBL3788	Kinase	0.0535561	0 / 1Â Â Â Â Â	BIO-TARGET
ISOPIMPINELLIN	Mitogen-activated protein kinase kinase kinase 8	MAP3K8	P41279	CHEMBL4899	Kinase	0.0535561	0 / 1Â Â Â Â Â	BIO-TARGET
ISOPIMPINELLIN	Ephrin receptor	EPHB4	P54760	CHEMBL5147	Kinase	0.0535561	0 / 1Â Â Â Â Â	BIO-TARGET
ISOPIMPINELLIN	Heat shock 70 kDa protein 1	HSPA1A	P0DMV8	CHEMBL5460	Other cytosolic protein	0.0535561	0 / 1Â Â Â Â Â	BIO-TARGET
ISOPIMPINELLIN	NUAK family SNF1-like kinase 1	NUAK1	O60285	CHEMBL5784	Kinase	0.0535561	0 / 1Â Â Â Â Â	BIO-TARGET
ISOPIMPINELLIN	Squalene monooxygenase (by homology)	SQLE	Q14534	CHEMBL3592	Enzyme	0.0535561	0 / 1Â Â Â Â Â	BIO-TARGET
ISOPIMPINELLIN	Tyrosine-protein kinase FGR (by homology)	FGR	P09769	CHEMBL4454	Kinase	0.0535561	0 / 1Â Â Â Â Â	BIO-TARGET
ISOPIMPINELLIN	Tyrosine-protein kinase Lyn (by homology)	LYN	P07948	CHEMBL3905	Kinase	0.0535561	0 / 1Â Â Â Â Â	BIO-TARGET
ISOPIMPINELLIN	Epidermal growth factor receptor erbB1	EGFR	P00533	CHEMBL203	Kinase	0.0535561	27 / 2Â Â Â Â Â	BIO-TARGET
ISOPIMPINELLIN	Monoamine oxidase A	MAOA	P21397	CHEMBL1951	Oxidoreductase	0.0535561	6 / 40Â Â Â Â Â	BIO-TARGET
ISOPIMPINELLIN	Melanin-concentrating hormone receptor 1	MCHR1	Q99705	CHEMBL344	Family A G protein-coupled receptor	0.0535561	6 / 0Â Â Â Â Â	BIO-TARGET
ISOPIMPINELLIN	Ribosomal protein S6 kinase 1	RPS6KB1	P23443	CHEMBL4501	Kinase	0.0535561	4 / 0Â Â Â Â Â	BIO-TARGET
ISOPIMPINELLIN	Toll-like receptor 4	TLR4	O00206	CHEMBL5255	Toll-like and Il-1 receptors	0.0535561	5 / 0Â Â Â Â Â	BIO-TARGET
ISOPIMPINELLIN	Poly [ADP-ribose] polymerase-1	PARP1	P09874	CHEMBL3105	Enzyme	0.0535561	7 / 0Â Â Â Â Â	BIO-TARGET
ISOPIMPINELLIN	Poly [ADP-ribose] polymerase 2	PARP2	Q9UGN5	CHEMBL5366	Enzyme	0.0535561	2 / 0Â Â Â Â Â	BIO-TARGET
ISOPIMPINELLIN	Carbonic anhydrase VI	CA6	P23280	CHEMBL3025	Lyase	0.0535561	4 / 6Â Â Â Â Â	BIO-TARGET
ISOPIMPINELLIN	Carbonic anhydrase XIV	CA14	Q9ULX7	CHEMBL3510	Lyase	0.0535561	4 / 12Â Â Â Â Â	BIO-TARGET
ISOPIMPINELLIN	Carbonic anhydrase IV	CA4	P22748	CHEMBL3729	Lyase	0.0535561	3 / 6Â Â Â Â Â	BIO-TARGET
ISOPIMPINELLIN	Carbonic anhydrase VA	CA5A	P35218	CHEMBL4789	Lyase	0.0535561	4 / 6Â Â Â Â Â	BIO-TARGET
ISOPIMPINELLIN	Serine/threonine-protein kinase AKT	AKT1	P31749	CHEMBL4282	Kinase	0.0535561	11 / 1Â Â Â Â Â	BIO-TARGET
ISOPIMPINELLIN	C-C chemokine receptor type 1	CCR1	P32246	CHEMBL2413	Family A G protein-coupled receptor	0.0535561	8 / 0Â Â Â Â Â	BIO-TARGET
ISOPIMPINELLIN	C-C chemokine receptor type 2	CCR2	P41597	CHEMBL4015	Family A G protein-coupled receptor	0.0535561	9 / 0Â Â Â Â Â	BIO-TARGET
ISOPIMPINELLIN	Trace amine-associated receptor 1	TAAR1	Q96RJ0	CHEMBL5857	Family A G protein-coupled receptor	0.0535561	4 / 0Â Â Â Â Â	BIO-TARGET

## Sheet: Methoxsalen 
METHOXSALEN	Target	Common name	Uniprot ID	ChEMBL ID	Target Class	Probability*	Known actives (3D/2D)	BIO-TARGET
METHOXSALEN	Acetylcholinesterase	ACHE	P22303	CHEMBL220	Hydrolase	0.980244	2 / 10Â Â Â Â Â	BIO-TARGET
METHOXSALEN	Cytochrome P450 1A2	CYP1A2	P05177	CHEMBL3356	Cytochrome P450	0.980244	3 / 5Â Â Â Â Â	BIO-TARGET
METHOXSALEN	Carbonic anhydrase XII	CA12	O43570	CHEMBL3242	Lyase	0.0690974	17 / 29Â Â Â Â Â	BIO-TARGET
METHOXSALEN	Carbonic anhydrase IX	CA9	Q16790	CHEMBL3594	Lyase	0.0690974	17 / 34Â Â Â Â Â	BIO-TARGET
METHOXSALEN	Voltage-gated potassium channel subunit Kv1.3	KCNA3	P22001	CHEMBL4633	Voltage-gated ion channel	0.0690974	0 / 10Â Â Â Â Â	BIO-TARGET
METHOXSALEN	Carbonic anhydrase VII	CA7	P43166	CHEMBL2326	Lyase	0.0604246	3 / 13Â Â Â Â Â	BIO-TARGET
METHOXSALEN	Carbonic anhydrase XIII	CA13	Q8N1Q1	CHEMBL3912	Lyase	0.0604246	3 / 17Â Â Â Â Â	BIO-TARGET
METHOXSALEN	Carbonic anhydrase II	CA2	P00918	CHEMBL205	Lyase	0.0604246	22 / 3Â Â Â Â Â	BIO-TARGET
METHOXSALEN	Monoamine oxidase A	MAOA	P21397	CHEMBL1951	Oxidoreductase	0.0604246	4 / 31Â Â Â Â Â	BIO-TARGET
METHOXSALEN	Epidermal growth factor receptor erbB1	EGFR	P00533	CHEMBL203	Kinase	0.0604246	22 / 2Â Â Â Â Â	BIO-TARGET
METHOXSALEN	Carbonic anhydrase I	CA1	P00915	CHEMBL261	Lyase	0.0604246	17 / 10Â Â Â Â Â	BIO-TARGET
METHOXSALEN	Nuclear factor NF-kappa-B p105 subunit	NFKB1	P19838	CHEMBL3251	Other cytosolic protein	0.0604246	2 / 2Â Â Â Â Â	BIO-TARGET
METHOXSALEN	Trace amine-associated receptor 1 (by homology)	TAAR1	Q96RJ0	CHEMBL5857	Family A G protein-coupled receptor	0.0604246	4 / 0Â Â Â Â Â	BIO-TARGET
METHOXSALEN	D-amino-acid oxidase	DAO	P14920	CHEMBL5485	Enzyme	0.0604246	0 / 1Â Â Â Â Â	BIO-TARGET
METHOXSALEN	Monoamine oxidase B	MAOB	P27338	CHEMBL2039	Oxidoreductase	0.0604246	11 / 34Â Â Â Â Â	BIO-TARGET
METHOXSALEN	Adenosine A1 receptor	ADORA1	P30542	CHEMBL226	Family A G protein-coupled receptor	0.0604246	44 / 0Â Â Â Â Â	BIO-TARGET
METHOXSALEN	Adenosine A2b receptor	ADORA2B	P29275	CHEMBL255	Family A G protein-coupled receptor	0.0604246	31 / 0Â Â Â Â Â	BIO-TARGET
METHOXSALEN	Adenosine A3 receptor	ADORA3	P0DMS8	CHEMBL256	Family A G protein-coupled receptor	0.0604246	13 / 0Â Â Â Â Â	BIO-TARGET
METHOXSALEN	Tyrosine-protein kinase JAK1	JAK1	P23458	CHEMBL2835	Kinase	0.0604246	6 / 0Â Â Â Â Â	BIO-TARGET
METHOXSALEN	Tyrosine-protein kinase JAK2	JAK2	O60674	CHEMBL2971	Kinase	0.0604246	7 / 0Â Â Â Â Â	BIO-TARGET
								BIO-TARGET
								BIO-TARGET
								BIO-TARGET
								BIO-TARGET
								BIO-TARGET
								BIO-TARGET
								BIO-TARGET
								BIO-TARGET
								BIO-TARGET
								BIO-TARGET
								BIO-TARGET
								BIO-TARGET
								BIO-TARGET
								BIO-TARGET
								BIO-TARGET
								BIO-TARGET
								BIO-TARGET
								BIO-TARGET
								BIO-TARGET
								BIO-TARGET
								BIO-TARGET
								BIO-TARGET
								BIO-TARGET
								BIO-TARGET
								BIO-TARGET
								BIO-TARGET
								BIO-TARGET
								BIO-TARGET
								BIO-TARGET
								BIO-TARGET
								BIO-TARGET
								BIO-TARGET
								BIO-TARGET
								BIO-TARGET
								BIO-TARGET
								BIO-TARGET
								BIO-TARGET
								BIO-TARGET
								BIO-TARGET
								BIO-TARGET
								BIO-TARGET
								BIO-TARGET
								BIO-TARGET
								BIO-TARGET
								BIO-TARGET
								BIO-TARGET
								BIO-TARGET
								BIO-TARGET
								BIO-TARGET
								BIO-TARGET
								BIO-TARGET
								BIO-TARGET
								BIO-TARGET
								BIO-TARGET
								BIO-TARGET
								BIO-TARGET
								BIO-TARGET
								BIO-TARGET
								BIO-TARGET
								BIO-TARGET
								BIO-TARGET
								BIO-TARGET
								BIO-TARGET
								BIO-TARGET
								BIO-TARGET
								BIO-TARGET
								BIO-TARGET
								BIO-TARGET
								BIO-TARGET
								BIO-TARGET
								BIO-TARGET
								BIO-TARGET
								BIO-TARGET
								BIO-TARGET
								BIO-TARGET
								BIO-TARGET
								BIO-TARGET
								BIO-TARGET
								BIO-TARGET
								BIO-TARGET

## Sheet: Xanthotoxol
XANTHOTOXOL	Target	Common name	Uniprot ID	ChEMBL ID	Target Class	Probability*	Known actives (3D/2D)	BIO-TARGET
XANTHOTOXOL	Acetylcholinesterase	ACHE	P22303	CHEMBL220	Hydrolase	0.0714808	0 / 6Â Â Â Â Â	BIO-TARGET
XANTHOTOXOL	Cytochrome P450 1A2	CYP1A2	P05177	CHEMBL3356	Cytochrome P450	0.0714808	0 / 5Â Â Â Â Â	BIO-TARGET
XANTHOTOXOL	D-amino-acid oxidase	DAO	P14920	CHEMBL5485	Enzyme	0.052424	7 / 1Â Â Â Â Â	BIO-TARGET
XANTHOTOXOL	Epidermal growth factor receptor erbB1	EGFR	P00533	CHEMBL203	Kinase	0.052424	8 / 2Â Â Â Â Â	BIO-TARGET
XANTHOTOXOL	Nuclear factor NF-kappa-B p105 subunit	NFKB1	P19838	CHEMBL3251	Other cytosolic protein	0.052424	0 / 2Â Â Â Â Â	BIO-TARGET
XANTHOTOXOL	Carbonic anhydrase XII	CA12	O43570	CHEMBL3242	Lyase	0.0428942	20 / 32Â Â Â Â Â	BIO-TARGET
XANTHOTOXOL	Carbonic anhydrase IX	CA9	Q16790	CHEMBL3594	Lyase	0.0428942	29 / 37Â Â Â Â Â	BIO-TARGET
XANTHOTOXOL	Carbonic anhydrase II	CA2	P00918	CHEMBL205	Lyase	0.0428942	57 / 4Â Â Â Â Â	BIO-TARGET
XANTHOTOXOL	G-protein coupled receptor 35	GPR35	Q9HC97	CHEMBL1293267	Family A G protein-coupled receptor	0.0428942	0 / 1Â Â Â Â Â	BIO-TARGET
XANTHOTOXOL	Cyclin-dependent kinase 4/cyclin D1	CCND1 CDK4	P24385 P11802	CHEMBL1907601	Kinase	0.0428942	0 / 1Â Â Â Â Â	BIO-TARGET
XANTHOTOXOL	Platelet-derived growth factor receptor beta	PDGFRB	P09619	CHEMBL1913	Kinase	0.0428942	0 / 1Â Â Â Â Â	BIO-TARGET
XANTHOTOXOL	Vascular endothelial growth factor receptor 3	FLT4	P35916	CHEMBL1955	Kinase	0.0428942	0 / 1Â Â Â Â Â	BIO-TARGET
XANTHOTOXOL	Insulin receptor	INSR	P06213	CHEMBL1981	Kinase	0.0428942	0 / 1Â Â Â Â Â	BIO-TARGET
XANTHOTOXOL	Tyrosine-protein kinase SRC	SRC	P12931	CHEMBL267	Kinase	0.0428942	0 / 1Â Â Â Â Â	BIO-TARGET
XANTHOTOXOL	Focal adhesion kinase 1	PTK2	Q05397	CHEMBL2695	Kinase	0.0428942	0 / 1Â Â Â Â Â	BIO-TARGET
XANTHOTOXOL	Serine/threonine-protein kinase PLK1	PLK1	P53350	CHEMBL3024	Kinase	0.0428942	0 / 2Â Â Â Â Â	BIO-TARGET
XANTHOTOXOL	Serine/threonine-protein kinase PLK4	PLK4	O00444	CHEMBL3788	Kinase	0.0428942	0 / 1Â Â Â Â Â	BIO-TARGET
XANTHOTOXOL	Tyrosine-protein kinase TIE-2	TEK	Q02763	CHEMBL4128	Kinase	0.0428942	0 / 1Â Â Â Â Â	BIO-TARGET
XANTHOTOXOL	Beta-secretase 1	BACE1	P56817	CHEMBL4822	Protease	0.0428942	0 / 5Â Â Â Â Â	BIO-TARGET
XANTHOTOXOL	Ephrin receptor	EPHB4	P54760	CHEMBL5147	Kinase	0.0428942	0 / 1Â Â Â Â Â	BIO-TARGET
XANTHOTOXOL	Heat shock 70 kDa protein 1	HSPA1A	P0DMV8	CHEMBL5460	Other cytosolic protein	0.0428942	0 / 1Â Â Â Â Â	BIO-TARGET
XANTHOTOXOL	NUAK family SNF1-like kinase 1	NUAK1	O60285	CHEMBL5784	Kinase	0.0428942	0 / 1Â Â Â Â Â	BIO-TARGET
XANTHOTOXOL	Squalene monooxygenase (by homology)	SQLE	Q14534	CHEMBL3592	Enzyme	0.0428942	0 / 1Â Â Â Â Â	BIO-TARGET
XANTHOTOXOL	Tyrosine-protein kinase FGR (by homology)	FGR	P09769	CHEMBL4454	Kinase	0.0428942	0 / 1Â Â Â Â Â	BIO-TARGET
XANTHOTOXOL	Tyrosine-protein kinase Lyn (by homology)	LYN	P07948	CHEMBL3905	Kinase	0.0428942	0 / 1Â Â Â Â Â	BIO-TARGET
XANTHOTOXOL	Protein tyrosine kinase 2 beta	PTK2B	Q14289	CHEMBL5469	Kinase	0.0428942	4 / 0Â Â Â Â Â	BIO-TARGET
XANTHOTOXOL	Receptor protein-tyrosine kinase erbB-2	ERBB2	P04626	CHEMBL1824	Kinase	0.0428942	5 / 1Â Â Â Â Â	BIO-TARGET
XANTHOTOXOL	Fructose-1,6-bisphosphatase	FBP1	P09467	CHEMBL3975	Enzyme	0.0428942	30 / 0Â Â Â Â Â	BIO-TARGET
XANTHOTOXOL	Estrogen receptor alpha	ESR1	P03372	CHEMBL206	Nuclear receptor	0.0428942	8 / 37Â Â Â Â Â	BIO-TARGET
XANTHOTOXOL	Estrogen receptor beta	ESR2	Q92731	CHEMBL242	Nuclear receptor	0.0428942	10 / 52Â Â Â Â Â	BIO-TARGET
XANTHOTOXOL	Prostatic acid phosphatase	ACPP	P15309	CHEMBL2633	Enzyme	0.0428942	9 / 0Â Â Â Â Â	BIO-TARGET
XANTHOTOXOL	Glutathione reductase	GSR	P00390	CHEMBL2755	Oxidoreductase	0.0428942	0 / 1Â Â Â Â Â	BIO-TARGET
XANTHOTOXOL	Voltage-gated potassium channel subunit Kv1.3	KCNA3	P22001	CHEMBL4633	Voltage-gated ion channel	0.0428942	0 / 9Â Â Â Â Â	BIO-TARGET
XANTHOTOXOL	Carbonic anhydrase I	CA1	P00915	CHEMBL261	Lyase	0.0428942	39 / 13Â Â Â Â Â	BIO-TARGET
XANTHOTOXOL	Carbonic anhydrase VA	CA5A	P35218	CHEMBL4789	Lyase	0.0428942	6 / 8Â Â Â Â Â	BIO-TARGET
XANTHOTOXOL	Carbonic anhydrase XIII	CA13	Q8N1Q1	CHEMBL3912	Lyase	0.0428942	9 / 19Â Â Â Â Â	BIO-TARGET
XANTHOTOXOL	Carbonic anhydrase VII	CA7	P43166	CHEMBL2326	Lyase	0.0428942	10 / 15Â Â Â Â Â	BIO-TARGET
XANTHOTOXOL	Carbonic anhydrase VI	CA6	P23280	CHEMBL3025	Lyase	0.0428942	5 / 6Â Â Â Â Â	BIO-TARGET
XANTHOTOXOL	Carbonic anhydrase XIV	CA14	Q9ULX7	CHEMBL3510	Lyase	0.0428942	8 / 12Â Â Â Â Â	BIO-TARGET

## Sheet:  Dictamnine
DICTAMNINE	Target	Common name	Uniprot ID	ChEMBL ID	Target Class	Probability*	Known actives (3D/2D)	BIO-TARGET
DICTAMNINE	Voltage-gated potassium channel subunit Kv1.3	KCNA3	P22001	CHEMBL4633	Voltage-gated ion channel	0.0428942	2 / 4Â Â Â Â Â	BIO-TARGET
DICTAMNINE	Cyclooxygenase-1	PTGS1	P23219	CHEMBL221	Oxidoreductase	0.0428942	17 / 0Â Â Â Â Â	BIO-TARGET
DICTAMNINE	MAP kinase p38 alpha	MAPK14	Q16539	CHEMBL260	Kinase	0.0428942	21 / 0Â Â Â Â Â	BIO-TARGET
DICTAMNINE	Muscarinic acetylcholine receptor M3	CHRM3	P20309	CHEMBL245	Family A G protein-coupled receptor	0.0428942	9 / 0Â Â Â Â Â	BIO-TARGET
DICTAMNINE	Muscarinic acetylcholine receptor M1 (by homology)	CHRM1	P11229	CHEMBL216	Family A G protein-coupled receptor	0.0428942	13 / 0Â Â Â Â Â	BIO-TARGET
DICTAMNINE	Induced myeloid leukemia cell differentiation protein Mcl-1	MCL1	Q07820	CHEMBL4361	Other cytosolic protein	0.0428942	3 / 0Â Â Â Â Â	BIO-TARGET
DICTAMNINE	Nischarin	NISCH	Q9Y2I1	CHEMBL3923	Other cytosolic protein	0.0428942	3 / 0Â Â Â Â Â	BIO-TARGET
DICTAMNINE	Fatty acid desaturase 1	FADS1	O60427	CHEMBL5840	Enzyme	0.0428942	3 / 0Â Â Â Â Â	BIO-TARGET
DICTAMNINE	Adenosine A1 receptor	ADORA1	P30542	CHEMBL226	Family A G protein-coupled receptor	0.0428942	30 / 0Â Â Â Â Â	BIO-TARGET
DICTAMNINE	Transmembrane domain-containing protein TMIGD3	TMIGD3	P0DMS9	CHEMBL3712907	Unclassified protein	0.0428942	2 / 0Â Â Â Â Â	BIO-TARGET
DICTAMNINE	Epoxide hydrolase 1	EPHX1	P07099	CHEMBL1968	Protease	0.0428942	23 / 0Â Â Â Â Â	BIO-TARGET
DICTAMNINE	c-Jun N-terminal kinase 1	MAPK8	P45983	CHEMBL2276	Kinase	0.0428942	28 / 0Â Â Â Â Â	BIO-TARGET
DICTAMNINE	Estrogen receptor beta	ESR2	Q92731	CHEMBL242	Nuclear receptor	0.0428942	12 / 0Â Â Â Â Â	BIO-TARGET
DICTAMNINE	P2X purinoceptor 7	P2RX7	Q99572	CHEMBL4805	Ligand-gated ion channel	0.0428942	29 / 0Â Â Â Â Â	BIO-TARGET
DICTAMNINE	Adenosine A2a receptor	ADORA2A	P29274	CHEMBL251	Family A G protein-coupled receptor	0.0428942	33 / 0Â Â Â Â Â	BIO-TARGET
DICTAMNINE	Adenosine A2b receptor	ADORA2B	P29275	CHEMBL255	Family A G protein-coupled receptor	0.0428942	36 / 0Â Â Â Â Â	BIO-TARGET
DICTAMNINE	Adenosine A3 receptor	ADORA3	P0DMS8	CHEMBL256	Family A G protein-coupled receptor	0.0428942	16 / 0Â Â Â Â Â	BIO-TARGET

## Sheet: Luvangetin 
Target	LUVANGETIN	Common name	Uniprot ID	ChEMBL ID	Target Class	Probability*	Known actives (3D/2D)	BIO-TARGET
Carbonic anhydrase VII	LUVANGETIN	CA7	P43166	CHEMBL2326	Lyase	0.37921	81 / 19Â Â Â Â Â	BIO-TARGET
Carbonic anhydrase I	LUVANGETIN	CA1	P00915	CHEMBL261	Lyase	0.37921	239 / 15Â Â Â Â Â	BIO-TARGET
Carbonic anhydrase XII	LUVANGETIN	CA12	O43570	CHEMBL3242	Lyase	0.37921	178 / 29Â Â Â Â Â	BIO-TARGET
Carbonic anhydrase IX	LUVANGETIN	CA9	Q16790	CHEMBL3594	Lyase	0.37921	227 / 34Â Â Â Â Â	BIO-TARGET
Carbonic anhydrase XIII	LUVANGETIN	CA13	Q8N1Q1	CHEMBL3912	Lyase	0.159189	32 / 17Â Â Â Â Â	BIO-TARGET
Phosphodiesterase 4D	LUVANGETIN	PDE4D	Q08499	CHEMBL288	Phosphodiesterase	0.143473	33 / 6Â Â Â Â Â	BIO-TARGET
Retinoic acid receptor alpha	LUVANGETIN	RARA	P10276	CHEMBL2055	Nuclear receptor	0.112042	0 / 4Â Â Â Â Â	BIO-TARGET
Monoamine oxidase A (by homology)	LUVANGETIN	MAOA	P21397	CHEMBL1951	Oxidoreductase	0.112042	170 / 25Â Â Â Â Â	BIO-TARGET
Poly [ADP-ribose] polymerase-1	LUVANGETIN	PARP1	P09874	CHEMBL3105	Enzyme	0.112042	226 / 0Â Â Â Â Â	BIO-TARGET
Epidermal growth factor receptor erbB1	LUVANGETIN	EGFR	P00533	CHEMBL203	Kinase	0.112042	374 / 0Â Â Â Â Â	BIO-TARGET
Tyrosine-protein kinase JAK1	LUVANGETIN	JAK1	P23458	CHEMBL2835	Kinase	0.112042	131 / 0Â Â Â Â Â	BIO-TARGET
Tyrosine-protein kinase JAK2	LUVANGETIN	JAK2	O60674	CHEMBL2971	Kinase	0.112042	190 / 0Â Â Â Â Â	BIO-TARGET
Bradykinin B2 receptor	LUVANGETIN	BDKRB2	P30411	CHEMBL3157	Family A G protein-coupled receptor	0.112042	16 / 0Â Â Â Â Â	BIO-TARGET
Mineralocorticoid receptor	LUVANGETIN	NR3C2	P08235	CHEMBL1994	Nuclear receptor	0.112042	69 / 0Â Â Â Â Â	BIO-TARGET
Regulator of G-protein signaling 4	LUVANGETIN	RGS4	P49798	CHEMBL1795091	Unclassified protein	0.112042	2 / 0Â Â Â Â Â	BIO-TARGET
Regulator of G-protein signaling 8	LUVANGETIN	RGS8	P57771	CHEMBL2034803	Enzyme	0.112042	1 / 0Â Â Â Â Â	BIO-TARGET
Lysine-specific demethylase 4C	LUVANGETIN	KDM4C	Q9H3R0	CHEMBL6175	Eraser	0.112042	15 / 0Â Â Â Â Â	BIO-TARGET
Tyrosine-protein kinase TYK2	LUVANGETIN	TYK2	P29597	CHEMBL3553	Kinase	0.112042	71 / 0Â Â Â Â Â	BIO-TARGET
Myeloperoxidase	LUVANGETIN	MPO	P05164	CHEMBL2439	Enzyme	0.112042	18 / 0Â Â Â Â Â	BIO-TARGET
Glycogen synthase kinase-3 beta	LUVANGETIN	GSK3B	P49841	CHEMBL262	Kinase	0.112042	251 / 0Â Â Â Â Â	BIO-TARGET
Platelet-derived growth factor receptor	LUVANGETIN	PDGFRA PDGFRB	P16234 P09619	CHEMBL2095189	Kinase	0.112042	25 / 0Â Â Â Â Â	BIO-TARGET
Phosphodiesterase 1B	LUVANGETIN	PDE1B	Q01064	CHEMBL4425	Phosphodiesterase	0.112042	10 / 0Â Â Â Â Â	BIO-TARGET
Trace amine-associated receptor 1 (by homology)	LUVANGETIN	TAAR1	Q96RJ0	CHEMBL5857	Family A G protein-coupled receptor	0.112042	50 / 0Â Â Â Â Â	BIO-TARGET
Protein kinase C gamma (by homology)	LUVANGETIN	PRKCG	P05129	CHEMBL2938	Kinase	0.112042	36 / 0Â Â Â Â Â	BIO-TARGET
Cyclin-dependent kinase 1/cyclin B	LUVANGETIN	CCNB3 CDK1 CCNB1 CCNB2	Q8WWL7 P06493 P14635 O95067	CHEMBL2094127	Other cytosolic protein	0.112042	80 / 0Â Â Â Â Â	BIO-TARGET
Cyclin-dependent kinase 2/cyclin A	LUVANGETIN	CDK2 CCNA1 CCNA2	P24941 P78396 P20248	CHEMBL2094128	Other cytosolic protein	0.112042	64 / 0Â Â Â Â Â	BIO-TARGET
Glycogen synthase kinase-3 alpha	LUVANGETIN	GSK3A	P49840	CHEMBL2850	Kinase	0.112042	19 / 0Â Â Â Â Â	BIO-TARGET
Tyrosyl-DNA phosphodiesterase 2	LUVANGETIN	TDP2	O95551	CHEMBL2169736	Enzyme	0.112042	10 / 0Â Â Â Â Â	BIO-TARGET
Cytochrome P450 19A1	LUVANGETIN	CYP19A1	P11511	CHEMBL1978	Cytochrome P450	0.112042	301 / 0Â Â Â Â Â	BIO-TARGET
ATP-binding cassette sub-family G member 2	LUVANGETIN	ABCG2	Q9UNQ0	CHEMBL5393	Primary active transporter	0.112042	24 / 0Â Â Â Â Â	BIO-TARGET
Matrix metalloproteinase 13	LUVANGETIN	MMP13	P45452	CHEMBL280	Protease	0.112042	22 / 0Â Â Â Â Â	BIO-TARGET
Serine/threonine-protein kinase PLK1	LUVANGETIN	PLK1	P53350	CHEMBL3024	Kinase	0.112042	22 / 0Â Â Â Â Â	BIO-TARGET
NAD-dependent deacetylase sirtuin 2	LUVANGETIN	SIRT2	Q8IXJ6	CHEMBL4462	Eraser	0.112042	50 / 0Â Â Â Â Â	BIO-TARGET
Endoplasmin	LUVANGETIN	HSP90B1	P14625	CHEMBL1075323	Other membrane protein	0.112042	30 / 0Â Â Â Â Â	BIO-TARGET
11-beta-hydroxysteroid dehydrogenase 1	LUVANGETIN	HSD11B1	P28845	CHEMBL4235	Enzyme	0.112042	226 / 0Â Â Â Â Â	BIO-TARGET
Macrophage colony stimulating factor receptor	LUVANGETIN	CSF1R	P07333	CHEMBL1844	Kinase	0.112042	42 / 0Â Â Â Â Â	BIO-TARGET
Cytochrome P450 11B1	LUVANGETIN	CYP11B1	P15538	CHEMBL1908	Cytochrome P450	0.112042	138 / 0Â Â Â Â Â	BIO-TARGET
Cytochrome P450 11B2	LUVANGETIN	CYP11B2	P19099	CHEMBL2722	Cytochrome P450	0.112042	164 / 0Â Â Â Â Â	BIO-TARGET
Phosphodiesterase 7A	LUVANGETIN	PDE7A	Q13946	CHEMBL3012	Phosphodiesterase	0.112042	62 / 0Â Â Â Â Â	BIO-TARGET
Cytochrome P450 17A1 (by homology)	LUVANGETIN	CYP17A1	P05093	CHEMBL3522	Cytochrome P450	0.112042	95 / 0Â Â Â Â Â	BIO-TARGET
Cytochrome P450 2C19	LUVANGETIN	CYP2C19	P33261	CHEMBL3622	Cytochrome P450	0.112042	15 / 0Â Â Â Â Â	BIO-TARGET
Melatonin receptor 1B	LUVANGETIN	MTNR1B	P49286	CHEMBL1946	Family A G protein-coupled receptor	0.112042	331 / 0Â Â Â Â Â	BIO-TARGET
Serotonin 2c (5-HT2c) receptor	LUVANGETIN	HTR2C	P28335	CHEMBL225	Family A G protein-coupled receptor	0.112042	95 / 0Â Â Â Â Â	BIO-TARGET
Vascular endothelial growth factor receptor 2	LUVANGETIN	KDR	P35968	CHEMBL279	Kinase	0.112042	178 / 0Â Â Â Â Â	BIO-TARGET
Inhibitor of nuclear factor kappa B kinase beta subunit	LUVANGETIN	IKBKB	O14920	CHEMBL1991	Kinase	0.112042	33 / 0Â Â Â Â Â	BIO-TARGET
Adenosine A1 receptor (by homology)	LUVANGETIN	ADORA1	P30542	CHEMBL226	Family A G protein-coupled receptor	0.112042	210 / 0Â Â Â Â Â	BIO-TARGET
Protein kinase C alpha	LUVANGETIN	PRKCA	P17252	CHEMBL299	Kinase	0.112042	22 / 0Â Â Â Â Â	BIO-TARGET
Group X secretory phospholipase A2	LUVANGETIN	PLA2G10	O15496	CHEMBL4342	Enzyme	0.112042	8 / 0Â Â Â Â Â	BIO-TARGET
Protein tyrosine kinase 2 beta	LUVANGETIN	PTK2B	Q14289	CHEMBL5469	Kinase	0.112042	7 / 0Â Â Â Â Â	BIO-TARGET
Cyclin-dependent kinase 4/cyclin D	LUVANGETIN	CCND3 CCND1 CDK4 CCND2	P30281 P24385 P11802 P30279	CHEMBL2095942	Other cytosolic protein	0.112042	11 / 0Â Â Â Â Â	BIO-TARGET
c-Jun N-terminal kinase 3	LUVANGETIN	MAPK10	P53779	CHEMBL2637	Kinase	0.112042	77 / 0Â Â Â Â Â	BIO-TARGET
Protein-glutamine gamma-glutamyltransferase	LUVANGETIN	TGM2	P21980	CHEMBL2730	Enzyme	0.112042	38 / 0Â Â Â Â Â	BIO-TARGET
Coagulation factor XIII	LUVANGETIN	F13A1	P00488	CHEMBL4530	Aminoacyltransferase	0.112042	4 / 0Â Â Â Â Â	BIO-TARGET
Thymidine phosphorylase	LUVANGETIN	TYMP	P19971	CHEMBL3106	Enzyme	0.112042	27 / 0Â Â Â Â Â	BIO-TARGET
Transthyretin	LUVANGETIN	TTR	P02766	CHEMBL3194	Secreted protein	0.112042	8 / 0Â Â Â Â Â	BIO-TARGET
Serine-protein kinase ATR	LUVANGETIN	ATR	Q13535	CHEMBL5024	Kinase	0.112042	22 / 0Â Â Â Â Â	BIO-TARGET
Phosphodiesterase 4B	LUVANGETIN	PDE4B	Q07343	CHEMBL275	Phosphodiesterase	0.112042	77 / 0Â Â Â Â Â	BIO-TARGET
Metabotropic glutamate receptor 5 (by homology)	LUVANGETIN	GRM5	P41594	CHEMBL3227	Family C G protein-coupled receptor	0.112042	268 / 0Â Â Â Â Â	BIO-TARGET
Hexokinase type IV	LUVANGETIN	GCK	P35557	CHEMBL3820	Enzyme	0.112042	25 / 0Â Â Â Â Â	BIO-TARGET
MAP kinase p38 alpha	LUVANGETIN	MAPK14	Q16539	CHEMBL260	Kinase	0.112042	113 / 0Â Â Â Â Â	BIO-TARGET
Intercellular adhesion molecule-1	LUVANGETIN	ICAM1	P05362	CHEMBL3070	Adhesion	0.112042	44 / 0Â Â Â Â Â	BIO-TARGET
Small conductance calcium-activated potassium channel protein 3	LUVANGETIN	KCNN3	Q9UGI6	CHEMBL3381	Voltage-gated ion channel	0.112042	6 / 0Â Â Â Â Â	BIO-TARGET
Selectin E	LUVANGETIN	SELE	P16581	CHEMBL3890	Adhesion	0.112042	44 / 0Â Â Â Â Â	BIO-TARGET
Histone deacetylase 3	LUVANGETIN	HDAC3	O15379	CHEMBL1829	Eraser	0.112042	7 / 0Â Â Â Â Â	BIO-TARGET
Histone deacetylase 2	LUVANGETIN	HDAC2	Q92769	CHEMBL1937	Eraser	0.112042	9 / 0Â Â Â Â Â	BIO-TARGET
Tyrosine-protein kinase SRC	LUVANGETIN	SRC	P12931	CHEMBL267	Kinase	0.112042	93 / 0Â Â Â Â Â	BIO-TARGET
Histone deacetylase 1	LUVANGETIN	HDAC1	Q13547	CHEMBL325	Eraser	0.112042	37 / 0Â Â Â Â Â	BIO-TARGET
MAP kinase-activated protein kinase 2	LUVANGETIN	MAPKAPK2	P49137	CHEMBL2208	Kinase	0.112042	51 / 0Â Â Â Â Â	BIO-TARGET
ADAMTS5	LUVANGETIN	ADAMTS5	Q9UNA0	CHEMBL2285	Protease	0.112042	25 / 0Â Â Â Â Â	BIO-TARGET
Caspase-1	LUVANGETIN	CASP1	P29466	CHEMBL4801	Protease	0.112042	7 / 0Â Â Â Â Â	BIO-TARGET
Dual specificity tyrosine-phosphorylation-regulated kinase 1B	LUVANGETIN	DYRK1B	Q9Y463	CHEMBL5543	Kinase	0.112042	33 / 0Â Â Â Â Â	BIO-TARGET
Receptor protein-tyrosine kinase erbB-2	LUVANGETIN	ERBB2	P04626	CHEMBL1824	Kinase	0.112042	45 / 0Â Â Â Â Â	BIO-TARGET
Caspase-3	LUVANGETIN	CASP3	P42574	CHEMBL2334	Protease	0.112042	26 / 0Â Â Â Â Â	BIO-TARGET
Caspase-7	LUVANGETIN	CASP7	P55210	CHEMBL3468	Protease	0.112042	15 / 0Â Â Â Â Â	BIO-TARGET
Heat shock protein HSP 90-alpha	LUVANGETIN	HSP90AA1	P07900	CHEMBL3880	Other cytosolic protein	0.112042	23 / 0Â Â Â Â Â	BIO-TARGET
P2X purinoceptor 7	LUVANGETIN	P2RX7	Q99572	CHEMBL4805	Ligand-gated ion channel	0.112042	168 / 0Â Â Â Â Â	BIO-TARGET
Cytochrome P450 1A2	LUVANGETIN	CYP1A2	P05177	CHEMBL3356	Cytochrome P450	0.112042	8 / 7Â Â Â Â Â	BIO-TARGET
Heat shock protein 75 kDa, mitochondrial	LUVANGETIN	TRAP1	Q12931	CHEMBL1075132	Other cytosolic protein	0.112042	5 / 0Â Â Â Â Â	BIO-TARGET
Bromodomain-containing protein 4	LUVANGETIN	BRD4	O60885	CHEMBL1163125	Reader	0.112042	53 / 0Â Â Â Â Â	BIO-TARGET
Epoxide hydrolase 1	LUVANGETIN	EPHX1	P07099	CHEMBL1968	Protease	0.112042	23 / 0Â Â Â Â Â	BIO-TARGET
Epoxide hydratase	LUVANGETIN	EPHX2	P34913	CHEMBL2409	Protease	0.112042	94 / 0Â Â Â Â Â	BIO-TARGET
Metabotropic glutamate receptor 4	LUVANGETIN	GRM4	Q14833	CHEMBL2736	Family C G protein-coupled receptor	0.112042	45 / 0Â Â Â Â Â	BIO-TARGET
Ribosomal protein S6 kinase 1	LUVANGETIN	RPS6KB1	P23443	CHEMBL4501	Kinase	0.112042	75 / 0Â Â Â Â Â	BIO-TARGET
Serine/threonine-protein kinase Aurora-A	LUVANGETIN	AURKA	O14965	CHEMBL4722	Kinase	0.112042	87 / 0Â Â Â Â Â	BIO-TARGET
CREB-binding protein/p53	LUVANGETIN	CREBBP	Q92793	CHEMBL5747	Writer	0.112042	12 / 0Â Â Â Â Â	BIO-TARGET
Serine/threonine-protein kinase PIM1	LUVANGETIN	PIM1	P11309	CHEMBL2147	Kinase	0.112042	102 / 0Â Â Â Â Â	BIO-TARGET
Arachidonate 5-lipoxygenase	LUVANGETIN	ALOX5	P09917	CHEMBL215	Oxidoreductase	0.112042	58 / 0Â Â Â Â Â	BIO-TARGET
Serine/threonine-protein kinase Aurora-B	LUVANGETIN	AURKB	Q96GD4	CHEMBL2185	Kinase	0.112042	34 / 0Â Â Â Â Â	BIO-TARGET
Casein kinase I gamma 1	LUVANGETIN	CSNK1G1	Q9HCP0	CHEMBL2426	Kinase	0.112042	2 / 0Â Â Â Â Â	BIO-TARGET
Ribosomal protein S6 kinase alpha 1	LUVANGETIN	RPS6KA1	Q15418	CHEMBL2553	Kinase	0.112042	2 / 0Â Â Â Â Â	BIO-TARGET
Casein kinase I alpha	LUVANGETIN	CSNK1A1	P48729	CHEMBL2793	Kinase	0.112042	6 / 0Â Â Â Â Â	BIO-TARGET
Phosphoglycerate kinase 1	LUVANGETIN	PGK1	P00558	CHEMBL2886	Enzyme	0.112042	15 / 0Â Â Â Â Â	BIO-TARGET
Rho-associated protein kinase 1	LUVANGETIN	ROCK1	Q13464	CHEMBL3231	Kinase	0.112042	48 / 0Â Â Â Â Â	BIO-TARGET
Hormone sensitive lipase	LUVANGETIN	LIPE	Q05469	CHEMBL3590	Enzyme	0.112042	14 / 0Â Â Â Â Â	BIO-TARGET
Protein kinase C mu	LUVANGETIN	PRKD1	Q15139	CHEMBL3863	Kinase	0.112042	5 / 0Â Â Â Â Â	BIO-TARGET
MAP kinase ERK2	LUVANGETIN	MAPK1	P28482	CHEMBL4040	Kinase	0.112042	32 / 0Â Â Â Â Â	BIO-TARGET
Serine/threonine-protein kinase receptor R3	LUVANGETIN	ACVRL1	P37023	CHEMBL5311	Kinase	0.112042	4 / 0Â Â Â Â Â	BIO-TARGET
Poly [ADP-ribose] polymerase 2 (by homology)	LUVANGETIN	PARP2	Q9UGN5	CHEMBL5366	Enzyme	0.112042	21 / 0Â Â Â Â Â	BIO-TARGET
Serotonin 2a (5-HT2a) receptor	LUVANGETIN	HTR2A	P28223	CHEMBL224	Family A G protein-coupled receptor	0.112042	72 / 0Â Â Â Â Â	BIO-TARGET
Phosphodiesterase 5A	LUVANGETIN	PDE5A	O76074	CHEMBL1827	Phosphodiesterase	0.112042	85 / 0Â Â Â Â Â	BIO-TARGET

## Sheet: 3-Hydroxycoumarin 
3-HYDROXYCOUMARIN	Target	Common name	Uniprot ID	ChEMBL ID	Target Class	Probability*	Known actives (3D/2D)	BIO-TARGET
3-HYDROXYCOUMARIN	D-amino-acid oxidase	DAO	P14920	CHEMBL5485	Enzyme	0.989976	19 / 1Â Â Â Â Â	BIO-TARGET
3-HYDROXYCOUMARIN	Carbonic anhydrase XII	CA12	O43570	CHEMBL3242	Lyase	0.183364	24 / 40Â Â Â Â Â	BIO-TARGET
3-HYDROXYCOUMARIN	Carbonic anhydrase IX	CA9	Q16790	CHEMBL3594	Lyase	0.183364	23 / 49Â Â Â Â Â	BIO-TARGET
3-HYDROXYCOUMARIN	Tyrosine-protein kinase SRC	SRC	P12931	CHEMBL267	Kinase	0.133391	1 / 1Â Â Â Â Â	BIO-TARGET
3-HYDROXYCOUMARIN	Xanthine dehydrogenase	XDH	P47989	CHEMBL1929	Oxidoreductase	0.133391	4 / 2Â Â Â Â Â	BIO-TARGET
3-HYDROXYCOUMARIN	G-protein coupled receptor 35	GPR35	Q9HC97	CHEMBL1293267	Family A G protein-coupled receptor	0.133391	0 / 2Â Â Â Â Â	BIO-TARGET
3-HYDROXYCOUMARIN	Aldose reductase	AKR1B1	P15121	CHEMBL1900	Enzyme	0.133391	0 / 12Â Â Â Â Â	BIO-TARGET
3-HYDROXYCOUMARIN	Platelet-derived growth factor receptor beta	PDGFRB	P09619	CHEMBL1913	Kinase	0.133391	0 / 1Â Â Â Â Â	BIO-TARGET
3-HYDROXYCOUMARIN	Vascular endothelial growth factor receptor 3	FLT4	P35916	CHEMBL1955	Kinase	0.133391	0 / 1Â Â Â Â Â	BIO-TARGET
3-HYDROXYCOUMARIN	Insulin-like growth factor I receptor	IGF1R	P08069	CHEMBL1957	Kinase	0.133391	0 / 2Â Â Â Â Â	BIO-TARGET
3-HYDROXYCOUMARIN	Insulin receptor	INSR	P06213	CHEMBL1981	Kinase	0.133391	0 / 1Â Â Â Â Â	BIO-TARGET
3-HYDROXYCOUMARIN	Serine/threonine-protein kinase Aurora-B	AURKB	Q96GD4	CHEMBL2185	Kinase	0.133391	0 / 3Â Â Â Â Â	BIO-TARGET
3-HYDROXYCOUMARIN	Focal adhesion kinase 1	PTK2	Q05397	CHEMBL2695	Kinase	0.133391	0 / 1Â Â Â Â Â	BIO-TARGET
3-HYDROXYCOUMARIN	Serine/threonine-protein kinase PLK1	PLK1	P53350	CHEMBL3024	Kinase	0.133391	0 / 2Â Â Â Â Â	BIO-TARGET
3-HYDROXYCOUMARIN	Carbonic anhydrase VI	CA6	P23280	CHEMBL3025	Lyase	0.133391	0 / 6Â Â Â Â Â	BIO-TARGET
3-HYDROXYCOUMARIN	Casein kinase II alpha	CSNK2A1	P68400	CHEMBL3629	Kinase	0.133391	0 / 1Â Â Â Â Â	BIO-TARGET
3-HYDROXYCOUMARIN	Hepatocyte growth factor receptor	MET	P08581	CHEMBL3717	Kinase	0.133391	0 / 2Â Â Â Â Â	BIO-TARGET
3-HYDROXYCOUMARIN	Serine/threonine-protein kinase PLK4	PLK4	O00444	CHEMBL3788	Kinase	0.133391	0 / 1Â Â Â Â Â	BIO-TARGET
3-HYDROXYCOUMARIN	Carbonic anhydrase XIII	CA13	Q8N1Q1	CHEMBL3912	Lyase	0.133391	0 / 22Â Â Â Â Â	BIO-TARGET
3-HYDROXYCOUMARIN	Tyrosine-protein kinase TIE-2	TEK	Q02763	CHEMBL4128	Kinase	0.133391	0 / 1Â Â Â Â Â	BIO-TARGET
3-HYDROXYCOUMARIN	Serine/threonine-protein kinase AKT	AKT1	P31749	CHEMBL4282	Kinase	0.133391	0 / 1Â Â Â Â Â	BIO-TARGET
3-HYDROXYCOUMARIN	Beta-secretase 1	BACE1	P56817	CHEMBL4822	Protease	0.133391	0 / 5Â Â Â Â Â	BIO-TARGET
3-HYDROXYCOUMARIN	Mitogen-activated protein kinase kinase kinase 8	MAP3K8	P41279	CHEMBL4899	Kinase	0.133391	0 / 1Â Â Â Â Â	BIO-TARGET
3-HYDROXYCOUMARIN	Ephrin receptor	EPHB4	P54760	CHEMBL5147	Kinase	0.133391	0 / 1Â Â Â Â Â	BIO-TARGET
3-HYDROXYCOUMARIN	Heat shock 70 kDa protein 1	HSPA1A	P0DMV8	CHEMBL5460	Other cytosolic protein	0.133391	0 / 1Â Â Â Â Â	BIO-TARGET
3-HYDROXYCOUMARIN	NUAK family SNF1-like kinase 1	NUAK1	O60285	CHEMBL5784	Kinase	0.133391	0 / 1Â Â Â Â Â	BIO-TARGET
3-HYDROXYCOUMARIN	Squalene monooxygenase (by homology)	SQLE	Q14534	CHEMBL3592	Enzyme	0.133391	0 / 1Â Â Â Â Â	BIO-TARGET
3-HYDROXYCOUMARIN	Tyrosine-protein kinase FGR (by homology)	FGR	P09769	CHEMBL4454	Kinase	0.133391	0 / 1Â Â Â Â Â	BIO-TARGET
3-HYDROXYCOUMARIN	Tyrosine-protein kinase Lyn (by homology)	LYN	P07948	CHEMBL3905	Kinase	0.133391	0 / 1Â Â Â Â Â	BIO-TARGET
3-HYDROXYCOUMARIN	Carbonic anhydrase I	CA1	P00915	CHEMBL261	Lyase	0.133391	20 / 22Â Â Â Â Â	BIO-TARGET
3-HYDROXYCOUMARIN	Carbonic anhydrase II	CA2	P00918	CHEMBL205	Lyase	0.133391	35 / 9Â Â Â Â Â	BIO-TARGET
3-HYDROXYCOUMARIN	Carbonic anhydrase VA	CA5A	P35218	CHEMBL4789	Lyase	0.133391	2 / 12Â Â Â Â Â	BIO-TARGET
3-HYDROXYCOUMARIN	Glutathione reductase	GSR	P00390	CHEMBL2755	Oxidoreductase	0.125076	0 / 1Â Â Â Â Â	BIO-TARGET
3-HYDROXYCOUMARIN	Receptor protein-tyrosine kinase erbB-2	ERBB2	P04626	CHEMBL1824	Kinase	0.125076	1 / 1Â Â Â Â Â	BIO-TARGET
3-HYDROXYCOUMARIN	Carbonic anhydrase VB	CA5B	Q9Y2D0	CHEMBL3969	Lyase	0.125076	0 / 10Â Â Â Â Â	BIO-TARGET
3-HYDROXYCOUMARIN	Serine/threonine-protein kinase Aurora-A	AURKA	O14965	CHEMBL4722	Kinase	0.125076	2 / 1Â Â Â Â Â	BIO-TARGET
3-HYDROXYCOUMARIN	Estrogen receptor alpha	ESR1	P03372	CHEMBL206	Nuclear receptor	0.125076	0 / 39Â Â Â Â Â	BIO-TARGET
3-HYDROXYCOUMARIN	Methionine aminopeptidase 2	METAP2	P50579	CHEMBL3922	Protease	0.125076	2 / 0Â Â Â Â Â	BIO-TARGET
3-HYDROXYCOUMARIN	Epidermal growth factor receptor erbB1	EGFR	P00533	CHEMBL203	Kinase	0.125076	8 / 2Â Â Â Â Â	BIO-TARGET
3-HYDROXYCOUMARIN	Troponin, cardiac muscle	TNNC1 TNNT2 TNNI3	P63316 P45379 P19429	CHEMBL2095202	Unclassified protein	0.116739	0 / 1Â Â Â Â Â	BIO-TARGET
3-HYDROXYCOUMARIN	Proteasome Macropain subunit MB1	PSMB5	P28074	CHEMBL4662	Protease	0.116739	1 / 0Â Â Â Â Â	BIO-TARGET
3-HYDROXYCOUMARIN	Indoleamine 2,3-dioxygenase	IDO1	P14902	CHEMBL4685	Enzyme	0.116739	4 / 0Â Â Â Â Â	BIO-TARGET
3-HYDROXYCOUMARIN	Tryptophan 2,3-dioxygenase (by homology)	TDO2	P48775	CHEMBL2140	Enzyme	0.116739	1 / 0Â Â Â Â Â	BIO-TARGET
3-HYDROXYCOUMARIN	Cyclooxygenase-2	PTGS2	P35354	CHEMBL230	Oxidoreductase	0.116739	0 / 3Â Â Â Â Â	BIO-TARGET
3-HYDROXYCOUMARIN	Estradiol 17-beta-dehydrogenase 3	HSD17B3	P37058	CHEMBL4234	Enzyme	0.116739	6 / 17Â Â Â Â Â	BIO-TARGET
3-HYDROXYCOUMARIN	Glycogen synthase kinase-3 beta	GSK3B	P49841	CHEMBL262	Kinase	0.116739	3 / 1Â Â Â Â Â	BIO-TARGET
3-HYDROXYCOUMARIN	Cyclin-dependent kinase 2/cyclin A	CDK2 CCNA1 CCNA2	P24941 P78396 P20248	CHEMBL2094128	Other cytosolic protein	0.116739	6 / 1Â Â Â Â Â	BIO-TARGET
3-HYDROXYCOUMARIN	Cyclin-dependent kinase 4/cyclin D1	CCND1 CDK4	P24385 P11802	CHEMBL1907601	Kinase	0.116739	1 / 1Â Â Â Â Â	BIO-TARGET

## Sheet: 4-isopropylbenzaldehyde 
4-ISOPROPYLBENZALDEHYDE	Target	Common name	Uniprot ID	ChEMBL ID	Target Class	Probability*	Known actives (3D/2D)	BIO-TARGET
4-ISOPROPYLBENZALDEHYDE	Alcohol dehydrogenase alpha chain	ADH1A	P07327	CHEMBL1970	Oxidoreductase	0.0535179	13 / 0Â Â Â Â Â	BIO-TARGET
4-ISOPROPYLBENZALDEHYDE	Alcohol dehydrogenase class II	ADH4	P08319	CHEMBL2990	Enzyme	0.0535179	1 / 0Â Â Â Â Â	BIO-TARGET
4-ISOPROPYLBENZALDEHYDE	Alcohol dehydrogenase beta chain	ADH1B	P00325	CHEMBL3284	Oxidoreductase	0.0535179	7 / 0Â Â Â Â Â	BIO-TARGET
4-ISOPROPYLBENZALDEHYDE	Alcohol dehydrogenase gamma chain	ADH1C	P00326	CHEMBL3285	Oxidoreductase	0.0535179	4 / 0Â Â Â Â Â	BIO-TARGET
4-ISOPROPYLBENZALDEHYDE	Tyrosinase	TYR	P14679	CHEMBL1973	Oxidoreductase	0.0439186	0 / 1Â Â Â Â Â	BIO-TARGET
4-ISOPROPYLBENZALDEHYDE	Acyl coenzyme A:cholesterol acyltransferase	CES1	P23141	CHEMBL2265	Enzyme	0.0439186	0 / 32Â Â Â Â Â	BIO-TARGET
4-ISOPROPYLBENZALDEHYDE	Carboxylesterase 2	CES2	O00748	CHEMBL3180	Enzyme	0.0439186	0 / 28Â Â Â Â Â	BIO-TARGET
4-ISOPROPYLBENZALDEHYDE	Aldehyde dehydrogenase 1A1	ALDH1A1	P00352	CHEMBL3577	Enzyme	0.0439186	1 / 0Â Â Â Â Â	BIO-TARGET
4-ISOPROPYLBENZALDEHYDE	Glycogen synthase kinase-3 beta	GSK3B	P49841	CHEMBL262	Kinase	0.0439186	8 / 16Â Â Â Â Â	BIO-TARGET
4-ISOPROPYLBENZALDEHYDE	Steroid 5-alpha-reductase 1	SRD5A1	P18405	CHEMBL1787	Oxidoreductase	0.0439186	49 / 0Â Â Â Â Â	BIO-TARGET

[truncated: 20 more sheets: Alloimperatorin, Alloimperatorin methyl, alloimperatorin methyl ether, Auraptene, Bergapten , Citral , CITRONELLAL, gamma-Fagarine, Nodakenin, Halfordinol, IMPERATORIN, Isoimperatorin, L-Rhamnose, o-halfordiol, Psoralen, Pyridine, Scoparone, Scopoletin, Skimmin, Combined targets of AM]
